# Supplementary material
Source: publisher figshare collection journal article supplement (https://gsajournals.figshare.com/articles/dataset/_/7473365)
Supplement: Supplementary file 1 [file 1]

## Sheet: S4 Table
chrom	pos	ref	alt	maximum_allele_frequency	num_suppressors_pass_0.7_allele_frequency	upstream_gene	downstream_gene	overlapping_gene	gene_effect	YJT75	SUP1	SUP2	SUP3	SUP4	SUP5	SUP6	SUP7	SUP8	SUP9	SUP10	SUP13	SUP14	SUP15	SUP17	SUP18	SUP19	SUP20	SUP21	SUP22	SUP23	SUP26	SUP27	SUP30	SUP35	SUP36	SUP38	SUP39	SUP40	SUP45	SUP46	SUP47	SUP52	SUP53	SUP54	SUP57	SUP58	SUP59	SUP61	SUP62
chrI	358	G	A	0.4217	0	YAL068W-A	YAL068C	YAL069W	SYNONYMOUS_CODING	0.0957	0.1164	0.1709	0.1182	0.1307	0.1429	0.0833	0.1086	0.1381	0.0889	0.1493	0.1875	0.1227	0.1292	0.0923	0.1121	0.2179	0.1382	0.1558	0.175	0.1626	0.1882	0.1089	0.2059	0.093	0.1171	0.1396	0.1297	0.1391	0.1307	0.1786	0.1745	0.177	0.1345	0.1412	0.1498	0.1096	0.2242	0.1421	0.189
chrI	648	A	T	0.7391	1	YAL067W-A	YAL068C	YAL069W	STOP_LOST	0	0	0	0	0	0	0	0	0	0	0	0	0	0	0	0	0	0	0	0	0	0	0	0	0	0	0	0	0	0	0	0	0	0	0	0	0	0	0	0
chrI	2127	C	G	0.8857	1	YAL067W-A	YAL068W-A	YAL068C	NON_SYNONYMOUS_CODING	0	0	0	0	0	0	0	0	0	0.8857	0	0	0	0	0	0	0	0	0	0	0	0	0	0	0	0	0	0	0	0	0	0	0	0	0	0	0	0	0	0
chrI	5461	T	C	10	1	YAL068C	YAL067C	NONE	NONE	0	0	0	0	0	0	0	0	0	0	0	0	0	0	0	0	0	0	0	0	0	0	0	0	0	0	0	0	0	0	0	0	0	0	0	0.0044	0	0	0	0
chrI	5648	C	A	10	1	YAL068C	YAL067C	NONE	NONE	0	0	0	0	0	0	0	0	0	0	0	0	0	0	0	0	0	0	0	0	0	0	0	0	0	0	0	0	0	0	0	0	0	0	0	0	0	0	0	0
chrI	6289	A	G	10	1	YAL066W	YAL067C	NONE	NONE	0	0	0	0	0	0	0	0	0	0	0	0	0	0	0	0	0	0	0	0	0	0	0	0	0	0	0	0	0	0	0	0	0	0	0	0	10	0	0	0
chrI	17147	T	A	0.7635	1	YAL064C-A	YAL064W-B	NONE	NONE	0	0	0	0	0	0	0	0	0	0	0	0	0	0	0	0	0	0	0	0	0	0	0	0	0	0	0	0	0	0	0	0	0	0	0	0	0	0	0	0
chrI	17807	C	A	0.9949	1	YAL064W	YAL063C-A	NONE	NONE	0	0	0	0	0	0	0	0	0	0	0	0	0	0	0	0	0	0	0	0	0	0	0	0	0	0	0	0	0	0	0	0	0	0	0	0	0	0	0	0
chrI	22458	T	C	0.4811	0	NONE	YAL064W	YAL063C-A	NON_SYNONYMOUS_CODING	0	0	0	0	0	0	0	0	0	0	0	0	0	0	0	0	0	0	0	0	0	0	0	0	0	0	0	0	0	0	0	0	0	0	0	0	0	0	0	0
chrI	24131	G	A	0.4874	0	YAL063C-A	YAL064W	YAL063C	NON_SYNONYMOUS_CODING	0	0	0	0	0	0	0	0	0	0	0	0	0	0	0	0	0	0	0	0	0	0	0	0	0	0	0	0	0	0	0	0	0	0	0	0	0	0	0.4874	0
chrI	30897	G	A	10	1	YAL062W	NONE	NONE	NONE	0	10	0	0	0	0	0	0	0	0.0052	0	0	0	0	0	0	0	0	0	0	0	0	0	0	0	0	0	0	0	0	0	0	0	0	0	0	0	0	0	0
chrI	31505	C	T	0.9881	1	YAL062W	YAL059C-A	NONE	NONE	0.0226	0.0119	0.027	0.0407	0.0326	0.0083	0.0122	0.0187	0.0345	0.0108	0.0133	0.03	0.0204	0.0099	0.015	0.0139	0.0213	0.044	0.0357	0.0405	0.0299	0.0259	0.0122	0.0089	0.0338	0.0082	0.0296	0.0286	0.0256	0.0345	0.0167	0.0114	0.0102	0	0.0267	0.0219	0.0244	0.0104	0.0215	0.018
chrI	32740	A	T	10	1	YAL061W	YAL059C-A	YAL062W	NON_SYNONYMOUS_CODING	0	0	0	0	0	0	0	0	0	0	0	0	0	0	0	0	0	0	0	0	0	0	0	0	0	0	0	0	0	0	0	0	0	0	10	0	0	0	0	0
chrI	38982	T	G	0.9931	1	YAL056W	YAL058W	YAL056C-A	SYNONYMOUS_CODING	0	0	0	0	0	0	0	0.0075	0	0	0	0	0	0	0	0.9931	0	0	0	0	0	0	0	0	0.005	0	0	0	0	0	0	0	0	0	0	0	0	0	0	0
chrI	40251	T	C	10	1	YAL056C-A	YAL058W	YAL056W	NON_SYNONYMOUS_CODING	0	0	0	0	0	0	0	0	0	0	0	0	0	0	0	0	0	0	0	0	0	0	0	0	0	0	0	0	0	0	0	0	0	0	0	0	0	0	0	0
chrI	40715	G	C	0.9939	1	YAL055W	YAL058W	YAL056W	NON_SYNONYMOUS_CODING	0	0	0	0	0	0	0	0	0	0	0	0	0	0	0	0.9939	0	0	0	0	0	0	0	0	0	0	0	0	0	0	0	0	0	0	0	0	0	0	0	0
chrI	41731	T	G	10	1	YAL055W	YAL054C	YAL056W	NON_SYNONYMOUS_CODING	0	0	0	0	0	0	0	0	0	0	0	0	0	0	0	0	0	0	0	0	0	0	0	0	0	0	0	0	0	0	0	0	0	0	0	0	0	0	0	0
chrI	49905	A	G	0.9865	1	YAL047W-A	YAL053W	YAL051W	SYNONYMOUS_CODING	0	0	0	0	0	0	0	0	0	0	0	0	0	0	0	0	0	0	0.9865	0	0	0	0	0	0	0	0	0	0	0	0	0	0	0	0	0	0	0	0	0
chrI	50940	A	G	10	1	YAL047W-A	YAL049C	YAL051W	NON_SYNONYMOUS_CODING	0	0	0	0	0	0	0	0	0	0	0	0	0	0	0	0	0	0	0	0	0	0	0	0	0	0	0	0	0	0	0	0	0	0	0	0	0	0	0	0
chrI	54351	T	A	0.9942	1	YAL047W-A	YAL047C	YAL048C	NON_SYNONYMOUS_CODING	0.0034	0	0	0	0	0	0	0	0	0	0	0	0	0	0	0	0	0	0	0	0	0	0	0	0	0	0	0	0	0.0054	0	0	0	0	0	0	0	0	0	0
chrI	54454	G	T	0.9946	1	YAL047W-A	YAL047C	YAL048C	NON_SYNONYMOUS_CODING	0	0	0	0	0	0	0	0	0	0.0052	0	0	0	0	0	0	0	0	0	0	0	0	0	0	0	0	0	0	0	0	0	0	0	0	0.9946	0	0.0041	0	0	0
chrI	56269	G	C	0.9912	1	YAL044W-A	YAL046C	YAL047C	NON_SYNONYMOUS_CODING	0	0	0	0	0	0	0	0	0	0	0	0	0	0	0	0	0	0	0	0	0	0	0	0	0	0	0	0	0	0	0	0	0	0	0	0	0	0	0	0
chrI	60881	T	C	10	1	YAL042W	YAL042C-A	YAL043C	NON_SYNONYMOUS_CODING	0	0	0	0	0	0	0	0	0	0	0	0	0	0	0	0	0	0	0	10	0	0	0	0	0	0	0	0	0	0	0	0	0	0	0	0	0	0	0	0
chrI	61144	C	A	0.984	1	YAL043C	YAL042C-A	NONE	NONE	0	0	0	0	0	0	0	0	0	0	0	0	0	0	0	0	0.0055	0	0	0	0	0	0	0	0	0	0	0	0	0	0	0	0.984	0	0	0	0.0046	0	0	0
chrI	61472	A	T	0.9589	1	YAL043C	YAL044W-A	YAL042C-A	SYNONYMOUS_CODING	0	0	0	0	0	0	0	0	0	0	0	0	0	0	0	0	0	0	0	0	0	0	0	0	0	0	0	0	0	0	0.9589	0	0	0	0	0	0	0	0	0
chrI	62790	T	A	10	1	YAL041W	YAL042W	NONE	NONE	0	0	0	0	0	0	0	0	0.005	0	0	0	0	0	0	0	0	0	0	0	0	0	0	0	0	0	0	0	0	0	0	0	0	0	0	0	0	0	0	0
chrI	65195	A	T	10	1	YAL042C-A	YAL040C	YAL041W	SYNONYMOUS_CODING	0	0	0	0	0	0	0	0	0	0	0	0	0	0	0	0	0	0	0	0	0	0	0	0	0	0	0	0	0	0	0	0	0	0	0	0	0	0	10	0
chrI	68779	G	A	10	1	YAL040C	YAL041W	YAL039C	NON_SYNONYMOUS_CODING	0	0	0	0	0	0	0	0	0	0	0	0	0	0	0	0	0	0	0	0	0	0	0	0	0	10	0	0	0	0	0	0	0	0	0	0	0	0	0	0
chrI	72108	G	A	10	1	YAL037W	YAL037C-B	YAL038W	NON_SYNONYMOUS_CODING	0	0	0	0	0	0	0	0	0	0	0	0	0	0	0	0	0	0	0	0	0	0	0	0	0	0	0	0.0041	10	0	0	0	0	0	0	0	0	0	0	0
chrI	80389	A	G	10	1	YAL034C-B	YAL034C	YAL034W-A	NON_SYNONYMOUS_CODING	0	0	0	0	0	0	0	0	0.005	0	0	0	0	0	0	0	0	0	0	0	0	0	0	0	0	0	0	0	0	0	0	0	0	0	0	0	0	0	0	0
chrI	80488	A	G	10	1	YAL034C-B	YAL034C	YAL034W-A	NON_SYNONYMOUS_CODING	0	0	0	0	0	0	0	0	0	0	0	0	0	0	0	0	0	0	0	0	0	0	0	0	0	0	0	0	10	0	0	0	0	0	0	0	0	0	0	0
chrI	93275	A	T	10	1	YAL029C	YAL026C-A	YAL028W	SYNONYMOUS_CODING	0	0	0	0	0	0	0	0	0	0	0	0	0	0	0	0	0	0	0	0	0	0	0	0	0	0	0	0	0	0	0	0	0	0	0	0	0	0	0	0
chrI	99584	T	C	0.98	1	YAL026C-A	YAL025C	YAL026C	NON_SYNONYMOUS_CODING	0	0	0	0	0	0	0	0	0	0	0	0	0	0	0	0	0	0	0	0	0	0	0	0	0	0	0	0	0	0	0	0	0	0	0	0	0	0	0	0
chrI	101678	T	A	0.6319	0	YAL025C	HRA1	YAL024C	NON_SYNONYMOUS_CODING	0	0	0	0	0	0	0	0	0	0	0	0	0	0	0	0	0	0	0	0	0	0	0	0	0	0	0	0	0	0	0	0	0	0	0	0	0	0	0	0
chrI	104460	T	C	10	1	YAL025C	YAL023C	YAL024C	NON_SYNONYMOUS_CODING	0	0	0.006	0	0	0	0	0	0	0	0	0	0	0	0	0	0	0	0	0	0	0	0	0	0	0	0	0	0	0	0	0	0	0	0	0	0	0	0	0
chrI	104519	A	G	0.931	1	YAL025C	YAL023C	YAL024C	NON_SYNONYMOUS_CODING	0	0	0	0	0	0	0	0	0	0	0	0	0	0	0	0	0	0	0.931	0	0	0	0	0	0	0	0	0	0	0	0	0	0	0	0	0	0	0	0	0
chrI	104531	G	C	0.9949	1	YAL025C	YAL023C	YAL024C	NON_SYNONYMOUS_CODING	0	0	0	0	0	0	0	0	0	0	0	0	0	0.0078	0	0	0	0	0	0	0	0	0	0	0	0	0	0	0	0	0	0	0	0	0	0	0	0.0045	0.9949	0
chrI	106464	A	G	0.9794	1	YAL024C	YAL022C	YAL023C	SYNONYMOUS_CODING	0	0	0	0	0	0	0	0	0	0	0	0	0	0	0	0	0	0	0	0	0	0	0	0	0	0	0	0	0	0	0	0	0	0	0	0	0	0	0	0
chrI	107246	A	G	10	1	YAL024C	YAL022C	YAL023C	NON_SYNONYMOUS_CODING	0	0	0	0	0	0	0	0	0	0	0	0	0	0	0	0	0	0	0	0	0	0	0	0	0	0	0	0	0	0	0	0	0	0	0	0	0	0	0	0
chrI	109237	G	T	0.9946	1	YAL023C	YAL021C	YAL022C	NON_SYNONYMOUS_CODING	0	0	0	0	0	0	0	0	0	0	0	0	0	0	0	0	0	0	0	0	0	0	0	0	0	0	0	0	0	0	0	0	0	0	0	0	0	0	0	0
chrI	109764	A	G	10	1	YAL023C	YAL021C	YAL022C	NON_SYNONYMOUS_CODING	0	0	0	0	0	0	0	0	0	0	0	0	0	0	0	0	0	0	0	0	0	0	0	0	0	0	0	0	0	0	0	0	0	0	0	0	0	0	0	0
chrI	127877	G	C	10	1	YAL013W	YAL014C	YAL015C	NON_SYNONYMOUS_CODING	0	0	0	0	0	0	0	0	0	0	0	0	0	0	0	0	0	0	0	0	0	0	0	0	0	0	0	0	0	0	0	0	0	0	0	0	0	0	0	0
chrI	127881	A	C	10	1	YAL013W	YAL014C	YAL015C	NON_SYNONYMOUS_CODING	0	0	0	0	0	0	0	0	0	0	0	0	0	0	0	0	0	0	0	0	0	0	0	0	0	0	0	0	0	0	0	0	0	0	0	0	0	0	0.0096	0
chrI	139503	G	T	10	1	YAL007C	YAL005C	NONE	NONE	0	0	0	0	0	0	0	0	0	0	0	0	0	0	0	0	0	0	0	0	0	0	0	0	0	0	0	0	0	0	0	0	0	0	0	0	0	0	0	0
chrI	142695	T	C	0.9904	1	YAL002W	snR18	YAL003W	NON_SYNONYMOUS_CODING	0	0	0	0	0	0	0	0	0	0	0	0	0	0	0	0	0	0	0	0	0	0	0.9904	0	0	0	0	0	0	0	0	0	0	0	0	0	0	0	0	0
chrI	147722	T	A	10	1	YAR002W	YAL002W	YAL001C	NON_SYNONYMOUS_CODING	0	0	0	0	0	0	0	0	0	0	0	0	0	0	0	0	0	0	0	0	0	0	0	0	0	0	0	0	0	0	0	0	0	0	0	0	0	0	0	0
chrI	155586	G	A	0.9938	1	YAR002C-A	YAR007C	YAR003W	NON_SYNONYMOUS_CODING	0	0	0	0	0	0	0	0	0	0	0	0	0	0	0	0	0	0	0	0	0	0	0	0	0	0	0	0	0	0	0	0	0.009	0	0	0	0	0	0	0.9938
chrI	166315	C	T	0.9932	1	YAR010C	YAR014C	tA(UGC)A	EXON	0	0	0	0	0	0	0	0	0	0	0	0	0	0	0	0	0	0	0	0	0	0	0	0	0	0	0	0	0	0	0	0	0	0	0	0	0	0	0	0
chrI	166615	G	A	10	1	YAR010C	YAR014C	NONE	NONE	0	0	0	0	0	0	0	0	0	0	0	0	0	0	0	0	0	0	0	0	0	0	0	0	0	0	0	0	0	0	0	0	0	0	0	0	0	0	0	0
chrI	167850	A	T	0.9944	1	YAR015W	tA(UGC)A	YAR014C	SYNONYMOUS_CODING	0.0029	0	0.9944	0	0	0	0	0	0	0	0	0	0	0	0	0	0	0	0	0	0	0	0	0	0	0	0	0	0	0	0	0	0	0	0	0	0	0	0	0
chrI	169442	G	A	10	1	YAR014C	YAR018C	YAR015W	NON_SYNONYMOUS_CODING	0	0	0	0	0	0	0	0	0	0	0	0	0	0	0	0.0041	0	0	0	0	0	0	0	0	0	0	0	0	0	0	0	0	0	0	0	0	0	0	0	0
chrI	172162	G	A	10	1	YAR018C	YAR019C	NONE	NONE	0	0	0	0	0	0	0	0	0	0	0	0	0	0	0	0	0	0	0	10	0	0	0	0	0	0	0	0	0	0	0	0	0	0	0	0	0	0	0	0
chrI	183231	A	C	0.9942	1	YAR027W	tL(CAA)A	NONE	NONE	0	0	0	0	0	0	0	0	0.0054	0	0	0	0	0	0	0	0	0	0	0	0	0	0	0	0	0	0	0	0	0	0	0	0	0	0	0	0	0	0	0
chrI	190773	A	T	10	1	YAR042W	YAR035C-A	YAR035W	NON_SYNONYMOUS_CODING	0	0	0	0	0	0	0	0	0	0	0	0	0	0	0	0	0	0	0	0	0	0	0	0	0	0	0	0	0	0	0	0	0	0	0	0	0	0	0	0
chrI	193866	A	G	0.9942	1	YAR035C-A	YAR035W	YAR042W	SYNONYMOUS_CODING	0	0	0	0.0067	0	0	0	0	0	0	0	0	0	0	0	0	0	0	0	0	0	0	0	0	0	0	0	0	0	0	0	0	0	0	0	0	0	0	0	0
chrI	223156	A	T	10	1	YAR071W	YAR068W	NONE	NONE	0	10	0	0	0	0	0	0	0	0	0	0	0	0	0	0	0	0	0	0	0	0	0	0	0	0	0	0	0	0	0	0	0	0	0	0	0	0	0	0
chrII	1187	C	T	10	1	YBL109W	YBL113W-A	YBL113C	NON_SYNONYMOUS_CODING	0.0863	0.16	0.0932	0.0968	0.1124	0.0808	0.1389	0.0926	0.0677	0.1351	0.0833	0.1049	0.1786	0.1961	0.0829	0.1304	0.1818	0.1324	0.1168	0.0987	0.0825	0.0993	10	0.0949	0.1207	0.1779	0.0909	0.1494	0.2331	0.1206	0.0795	0.2028	0.172	0.1878	0.1591	0.1893	0.2151	0.1452	0.1732	0.0896
chrII	1785	C	T	0.7292	1	YBL109W	YBL113W-A	YBL113C	NON_SYNONYMOUS_CODING	0.0923	0.1299	0.1278	0.129	0.1654	0.149	0.1402	0.1487	0.1071	0.1561	0.1281	0.1991	0.1564	0.1483	0.1434	0.1333	0.1101	0.1579	0.0773	0.1326	0.1159	0.1366	0.7292	0.1068	0.1741	0.1618	0.1449	0.1584	0.1017	0.1295	0.1269	0.1383	0.1239	0.1375	0.2199	0.1699	0.0873	0.1269	0.1075	0.1406
chrII	1867	A	C	0.7826	1	YBL109W	YBL112C	YBL113C	SYNONYMOUS_CODING	0.0671	0.1392	0.1814	0.1142	0.1767	0.1476	0.1718	0.1288	0.1628	0.125	0.0963	0.0943	0.1948	0.1117	0.1571	0.1048	0.1593	0.0573	0.1397	0.179	0.162	0.1436	0.7826	0.1508	0.1209	0.1726	0.1573	0.1093	0.1988	0.1207	0.1696	0.1494	0.1582	0.1261	0.1324	0.125	0.1982	0.1805	0.1808	0.1302
chrII	11636	G	T	10	2	YBL107C	tL(UAA)B1	YBL106C	NON_SYNONYMOUS_CODING	0	0	0	0	0	0	0	0	0	0	0	0	0	0	0	0	0	0	0	0	0	0	0	0	0	0	0	0	0	0	0	0	0	0	0	0	0	0	0	0
chrII	13669	C	A	10	1	YBL107C	YBL105C	YBL106C	NON_SYNONYMOUS_CODING	0	0	0	0	0.0056	0	0	10	0	0	0	0	0	0	0	0	0	0	0	0	0	0	0	0	0	0	0	0	0	0	0	0	0	0	0	0	0	0	0	0.0072
chrII	16767	T	A	10	1	YBL106C	YBL104C	YBL105C	NON_SYNONYMOUS_CODING	0	0	0	0	0	0	0	0.005	0	0	0	0	0	0	0	0	0	0	0	0	0	0	0	0	0	0	0	0	0	0	0	0	0	0	0	0	0	0	0	0
chrII	17024	G	T	0.9919	1	YBL106C	YBL104C	YBL105C	NON_SYNONYMOUS_CODING	0	0	0	0	0	0	0	0	0	0	0	0	0	0	0	0	0	0	0	0	0	0	0	0	0	0	0	0	0	0	0	0	0	0	0	0.9919	0	0	0	0
chrII	23433	T	C	10	1	YBL102W	YBL101C	YBL103C	NON_SYNONYMOUS_CODING	0	0	0	0	0	0	0	0	0	0	0	0	0	0	0	0	0	0	0	0	0	0	0.0073	0	0	0	0	0	0	0	0	0	0	0	0	0	0	0	0	0
chrII	23671	T	A	0.9947	1	YBL103C	YBL101C	NONE	NONE	0	0	0	0	0	0	0	0	0	0	0	0	0	0	0	0	0	0	0	0	0	0	0	0	0	0	0	0	0	0	0	0	0	0.9947	0	0	0	0	0	0
chrII	26650	T	A	10	1	YBL100W-C	YBL102W	YBL101C	SYNONYMOUS_CODING	0	0	0	0	0	0	0	0	0	0	0	0	0	0	0	0	0	0	0	0	0	0	0	0	0	0	0	0	0	0	0	0	0	0	0	0	0	0	0	0
chrII	27365	G	T	0.9586	1	YBL100W-C	YBL102W	YBL101C	NON_SYNONYMOUS_CODING	0	0	0	0	0	0	0	0	0	0	0	0	0	0	0	0	0	0	0	0	0	0	0	0	0	0.9586	0	0	0	0	0	0	0	0	0	0	0	0	0	0
chrII	33771	A	T	10	1	tF(GAA)B	YBL100W-A	YBL100W-B	NON_SYNONYMOUS_CODING	0	0	0	0	0	0	0	0	0	0	0	0	0	0	0	0	0	0	0	0	0	0	0	0	0	0	0	0	0	0	0	0	0	0	0	0	0	0	0	0
chrII	34204	C	T	0.4535	0	tF(GAA)B	YBL100C	YBL100W-B	SYNONYMOUS_CODING	0	0	0	0	0	0	0	0	0	0	0.0189	0	0	0	0	0	0	0	0	0	0	0	0	0	0	0	0	0.4535	0	0	0	0.3562	0	0	0.0233	0.0154	0	0	0	0
chrII	36473	C	T	0.9909	1	YBL099W	YBL100C	tF(GAA)B	EXON	0	0	0	0	0	0	0	0	0	0	0	0	0	0	0	0	0	0	0	0	0	0	0	0	0	0.0101	0	0	0	0	0	0	0	0	0	0	0	0	0	0
chrII	46733	G	T	10	1	YBL093C	YBL092W	YBL091C-A	SYNONYMOUS_CODING	0	0	0	10	0	0	0	0	0	0	0	0	0	0	0	0	0	0	0	0	0	0	0	0	0	0	0	0	0	0	0	0	0	0	0	0	0	0	0	0
chrII	52194	C	A	0.9914	1	YBL091C	YBL089W	YBL088C	NON_SYNONYMOUS_CODING	0	0	0	0	0	0	0	0	0	0	0	0	0	0	0	0	0	0	0	0	0	0.0055	0	0	0	0	0	0	0	0	0	0	0	0	0	0	0	0	0	0
chrII	57591	A	C	10	1	NONE	YBL087C	YBL088C	NON_SYNONYMOUS_CODING	0	0	0	0	0	0	0	0	10	0	0	0	0	0	0	0	0	0	0	0	0	0	0	0	0	0	0	0	0	0	0	0	0	0	0	0	0	0	0	0
chrII	62613	G	C	0.9866	1	YBL086C	YBL084C	NONE	NONE	0	0	0	0	0	0	0	0	0	0	0	0	0	0	0	0.0037	0	0	0	0	0	0	0.9866	0	0	0	0	0	0	0	0	0	0	0	0	0	0	0	0	0
chrII	63329	C	A	10	1	YBL085W	YBL084C	NONE	NONE	0	0	0	0	0	0	0	0	0	0	0	0	0	0	0	0	0	0	0	0	0	0	0	0	0	0	0	0	0	0	0	0	0	0	0	0	0.0042	0	0	0
chrII	63611	C	G	10	1	YBL085W	YBL084C	NONE	NONE	0	0	0	0	0	0	0	0	0	0	0	0	0	0	0	0	0	0	0	0	0	0	0	0	0	0	0	0	0	0	0	0	0	0	0	0	0	0	0	0
chrII	63670	G	T	0.9885	1	YBL085W	YBL084C	NONE	NONE	0	0	0	0	0	0	0	0	0	0	0	0	0	0.0059	0	0	0	0	0	0	0	0	0	0	0	0	0	0	0	0	0.0072	0	0	0	0	0	0	0	0	0
chrII	68889	G	A	0.4062	0	YBL081W	YBL083C	YBL084C	NON_SYNONYMOUS_CODING	0	0	0	0	0	0	0	0	0	0	0	0	0	0	0	0	0.0059	0	0	0	0	0	0.0054	0	0	0	0	0	0	0	0	0	0	0	0	0	0	0	0	0
chrII	71961	C	A	10	1	YBL082C	YBL080C	YBL081W	SYNONYMOUS_CODING	0	0	0	0	0	0	0	0	0	0	0	0	0	0	0	0	0	0	0	0	0	0	0	0	0	0	0	0	0	0	0	0.0079	0	0	0	0	0.0054	0	0	0
chrII	73688	C	A	0.9825	1	YBL079W	YBL081W	YBL080C	NON_SYNONYMOUS_CODING	0	0	0	0	0	0	0	0	0	0	0	0	0	0	0	0	0	0	0	0	0	0	0	0	0	0	0	0	0	0	0	0	0.0112	0	0.9825	0	0	0.0069	0	0
chrII	75168	T	C	10	1	YBL079W	YBL081W	NONE	NONE	0	0	0	0	0	0	0	0	0	0	0	0	0	0	0	0	0	0	0	0	0	0	0	0	0	0	0	0	0	0	0	0	0	0	0	0	0	0	0	0
chrII	78775	C	A	10	1	YBL077W	YBL078C	YBL079W	NON_SYNONYMOUS_CODING	0	0	0	10	0	0	0	0	0	0	0	0	0	0	0	0	0	0	0	0	0	0	0	0	0	0	0	0	0	0	0	0	0	0	0	0	0	0	0	0
chrII	81423	T	C	10	1	YBL078C	YBL077W	YBL076C	NON_SYNONYMOUS_CODING	0	0	0	0	0	0	0	0.0055	0	0	0.0055	0	0	0	0	0	0	0	0	0	0	0	0	0	0	0	0	0	0	0	0	0	0.0069	0	0	0	0	0	0	0
chrII	90113	T	C	0.9934	1	YBL071C-B	YBL071C	YBL071W-A	SYNONYMOUS_CODING	0	0	0	0	0	0	0	0	0	0	0	0	0	0	0	0	0	0	0	0	0	0	0	0	0	0	0	0	0	0	0	0	0	0	0	0	0	0	0	0
chrII	99211	C	G	10	1	YBL065W	YBL064C	YBL066C	NON_SYNONYMOUS_CODING	0	0	0	0	0	0	10	0	0	0	0	0.0104	0	0	0	0	0	0	0	0	0	0	0	0	0	0	0	0	0	0	0	0	0	0	0	0	0	0	0	0
chrII	104107	G	T	0.9886	1	YBL062W	YBL061C	YBL063W	NON_SYNONYMOUS_CODING	0	0	0	0	0	0	0	0	0	0	0	0	0	0	0	0	0	0	0	0	0	0	0	0	0	0	0	0	0	0	0	0	0	0	0	0	0	0	0	0
chrII	105273	A	G	0.8302	1	YBL062W	YBL061C	NONE	NONE	0	0	0	0	0	0	0	0	0	0	0	0	0	0	0	0	0	0	0	0	0	0	0	0	0	0	0	0	0	0	0	0	0	0	0	0	0	0	0	0
chrII	105288	T	C	10	1	YBL062W	YBL061C	NONE	NONE	0	0	0	0	0	0	0	0	0	0	0	0	0	0	0	0	0	0	0	0	0	0	0	0	0	0	0	0	0	0	0	0	0	0	0	10	0	0	0	0
chrII	109924	T	G	10	1	YBL059W	YBL059C-A	YBL060W	NON_SYNONYMOUS_CODING	0	0	0	0	0	0	0	0	0	0	0	0	0	0	0	0	0	0	0	0	0	0	0	0	10	0	0	0	0	0	0	0	0	0	0	0	0	0	0	0
chrII	110333	C	A	10	1	YBL059W	YBL060W	YBL059C-A	NON_SYNONYMOUS_CODING	0	0	0	0	0	0	0	0	0	0	0	0	0	0	0	0	0	0	0	0	0	0	0	0	0	0	0.0047	0	0.0062	0	0	0	0	0	0	0	0	0	0	0
chrII	111493	T	G	0.9241	1	YBL059C-A	YBL059W	YBL058W	NON_SYNONYMOUS_CODING	0	0	0	0	0	0	0	0	0	0.0068	0	0	0	0.9241	0	0	0	0	0	0	0	0	0	0	0	0	0	0	0	0	0	0	0	0	0	0	0	0	0	0
chrII	120264	G	A	0.9926	1	YBL055C	YBL053W	YBL052C	SYNONYMOUS_CODING	0	0	0	0	0	0	0	0	0	0	0	0	0	0	0	0	0	0	0	0	0	0	0	0	0	0	0	0	0	0	0	0	0	0	0	0	0	0	0	0
chrII	120405	T	A	0.9944	1	YBL055C	YBL053W	YBL052C	NON_SYNONYMOUS_CODING	0	0	0	0	0	0	0	0	0	0	0	0	0	0	0	0	0	0	0	0	0	0	0	0	0	0	0	0	0	0	0	0	0	0	0	0	0	0	0	0
chrII	120706	G	A	10	1	YBL055C	YBL053W	YBL052C	NON_SYNONYMOUS_CODING	0	0	0	0	0	0	0	0	0	0	10	0	0	0	0	0	0	0	0	0	0	0	0	0	0	0	0	0	0	0	0	0.0065	0	0	0	0	0	0	0	0
chrII	123353	G	C	10	1	YBL052C	YBL053W	YBL051C	NON_SYNONYMOUS_CODING	0	0	0	0	0	0	0	0	0	0	0	0	0	0	0	0	0	0	0	0	0	0	0.0077	0	0	0	0	0	0	0	0	0	0	0	0	0	0	0	10	0
chrII	124118	G	C	10	1	YBL050W	YBL047C	YBL051C	NON_SYNONYMOUS_CODING	0	0	0	0	0	0	0	0	0	0	0	0	0	0	0	0	0	0	0	0	0	0	0	0	0	0	0	0	0	0	0	0	0	0	0	0	0	0	10	0
chrII	125669	G	C	10	1	YBL051C	YBL047C	YBL050W	NON_SYNONYMOUS_CODING	0	0	0	0	0	0	0	0	0	0	0	0	0	0	0	0	0	0	0	0	0	0	0	0	0	0	0	0	0	0	0	0	0	0	0	0	0	0	10	0
chrII	130061	T	G	0.9843	1	YBL046W	YBL048W	YBL047C	NON_SYNONYMOUS_CODING	0	0	0	0	0	0	0	0	0	0	0	0	0	0	0	0	0	0	0	0	0	0	0	0	0	0	0	0	0	0	0	0	0	0	0	0	0	0	0	0
chrII	131254	A	G	0.9882	1	YBL046W	YBL045C	YBL047C	NON_SYNONYMOUS_CODING	0	0	0	0	0	0	0	0	0	0	0	0	0	0	0	0	0	0	0.0054	0	0	0	0	0	0	0	0	0	0	0.9882	0	0	0	0	0	0	0	0	0	0
chrII	133880	A	T	10	1	YBL047C	YBL046W	NONE	NONE	0	0	0	0	0	0	0	0	0	0	0	0	0	0	0	10	0	0	0	0	0	0	0	0	0	0	0	0	0	0	0	0	0	0	0	0	0	0	0	0
chrII	135706	G	A	10	1	YBL045C	YBL046W	NONE	NONE	0	0	0	0	0	0	0	0	0	0	0	0	0	0	0	0	0	0	0	0	0	0	0	0	0	0.0059	0	0	0	0	0	0	0	0	0	0	0	0	0	0
chrII	136365	A	T	10	1	YBL043W	YBL042C	YBL044W	NON_SYNONYMOUS_CODING	0	0	0	0	0	0	0	0	0	0	0	0	0	0	0	0	0	0	0	0	0	0	0	0	0	0	0	0	0	10	0	0	0	0	0	0	0	0	0	0
chrII	138443	G	T	0.9664	1	YBL041W	YBL043W	YBL042C	SYNONYMOUS_CODING	0	0	0	0	0	0	0	0	0	0	0	0	0	0	0	0.0053	0	0	0	0	0	0	0	0	0	0.9664	0	0	0	0	0.0069	0	0	0	0	0	0	0	0	0
chrII	141100	T	C	0.7073	1	YBL041W	YBL040C	NONE	NONE	0	0	0	0	0	0	0	0	0	0	0	0	0	0	0	0	0	0	0	0	0	0	0	0	0	0	0	0	0	0	0	0	0	0	0	0	0	0	0	0
chrII	141884	A	G	10	1	YBL039W-B	YBL040C	YBL041W	NON_SYNONYMOUS_CODING	0	0	10	0	0	0	0	0	0	0	0	0	0	0	0	0	0	0	0	0	0	0	0	0	0	0	0	0	0	0	0	0	0	0	0	0	0	0	0	0
chrII	142351	A	T	0.9955	1	YBL039W-B	YBL041W	YBL040C	NON_SYNONYMOUS_CODING	0	0	0	0	0	0	0	0	0	0	0	0	0	0	0	0	0	0	0	0	0	0	0	0	0	0	0	0	0	0	0	0	0	0	0	0	0	0	0	0
chrII	142920	A	T	0.6803	0	YBL040C	YBL041W	NONE	NONE	0	0	0	0	0	0	0	0	0	0	0	0	0	0	0	0	0	0	0	0	0	0	0	0	0	0	0	0	0	0	0	0	0	0	0	0	0	0	0	0
chrII	143721	C	A	10	1	YBL040C	YBL039W-B	NONE	NONE	0	0	0	0	0	0	0	0	0	0	0	0	0	0	0	0	0	0	0	0	0	0	0	0	0	0	0	0	0	0	0	0	0	0.005	0	0	0	0	0	0
chrII	145173	G	A	10	1	YBL039C-A	YBL039W-B	YBL039C	NON_SYNONYMOUS_CODING	0	0	0	0	0	0	0	0	0	0	0	0	0	0	0	0	0	0	0	0	0	0	0	0	0	0	0	0	0	0	0	0	0	0	0	0	0	0	0	0
chrII	157334	T	A	0.993	1	YBL032W	YBL033C	YBL034C	SYNONYMOUS_CODING	0	0	0	0	0	0	0	0	0	0	0	0	0	0	0	0	0	0	0	0	0	0	0	0	0	0	0	0	0	0	0	0	0	0	0	0	0	0	0	0
chrII	158087	T	C	0.9833	1	YBL032W	YBL033C	YBL034C	SYNONYMOUS_CODING	0	0	0	0	0	0	0	0	0	0	0	0	0	0	0	0	0	0	0	0	0	0	0	0	0	0	0	0	0	0	0	0	0	0	0	0	0	0	0	0
chrII	158215	G	T	0.9815	1	YBL032W	YBL033C	YBL034C	NON_SYNONYMOUS_CODING	0	0	0	0	0	0	0	0	0	0	0	0	0	0	0	0	0.0075	0	0	0	0	0	0	0	0	0.0076	0	0	0	0	0	0	0	0	0	0	0	0	0	0
chrII	165199	C	A	0.9661	1	YBL029C-A	YBL028C	NONE	NONE	0	0	0	0	0	0	0	0	0	0	0	0	0	0	0	0	0	0	0	0	0	0	0	0	0	0	0	0	0	0	0.9661	0	0	0	0	0	0	0	0	0
chrII	168397	A	T	0.9919	1	YBL027W	YBL029W	NONE	NONE	0	0	0	0	0	0	0	0	0	0	0	0	0	0	0	0	0	0	0	0	0	0	0	0.0055	0	0	0	0	0	0	0	0	0	0	0	0.9919	0	0	0	0
chrII	169166	G	A	10	1	YBL028C	YBL029W	YBL027W	SYNONYMOUS_CODING	0	0	0	0	0	0	0	0	0	10	0	0	0	0.0048	0	0	0	0	0	0	0	0	0	0	0	0	0	0	0	0	0	0	0	0	0	0	0	0	0	0
chrII	173298	C	A	0.9828	1	NONE	YBL025W	YBL024W	SYNONYMOUS_CODING	0	0	0	0	0	0	0	0	0	0	0	0	0	0	0	0	0	0	0	0	0	0	0	0	0	0	0	0	0	0	0	0	0	0	0	0	0	0	0.0056	0.0063
chrII	197316	C	T	10	1	tI(AAU)B	tG(GCC)B	NONE	NONE	0	0	0	0	0	0	0	0	0	10	0	0	0	0	0	0	0	0	0	0	0	0	0	0	0	0	0	0	0	0	0	0	0	0	0	0	0	0	0	0
chrII	200058	G	T	10	1	YBL013W	tI(AAU)B	YBL014C	NON_SYNONYMOUS_CODING	0	0	0	0	0	0	0	0	0	0	0	0	0	0	0	0	0	0	0	0	0	0	0	0	0	0	0	0	0	0	0	0	0	0	0	0	0	0	0	0
chrII	217834	A	G	0.991	1	YBL006C	YBL006W-A	YBL005W	NON_SYNONYMOUS_CODING	0	0.0096	0	0	0	0	0	0	0	0	0	0	0	0	0	0	0	0.0071	0	0	0	0	0	0	0	0	0	0	0	0	0	0	0	0.0075	0	0	0	0	0	0
chrII	217873	A	G	10	1	YBL006C	YBL006W-A	YBL005W	NON_SYNONYMOUS_CODING	0	0	0	0	0	0	0	0	0	0	0.0075	0	0	0	0	0	0	0	0	0	0	0	0	0	0	0	0	0	0	0	0	0	0	0	0	0	0	0	0	0
chrII	219886	A	G	0.6228	0	YBL005W-A	YBL006W-A	YBL005W	NON_SYNONYMOUS_CODING	0	0	0	0	0	0	0	0	0	0	0	0	0	0	0	0	0	0	0	0	0	0	0	0	0	0	0	0	0	0	0	0	0	0	0	0	0	0	0	0
chrII	220050	A	C	0.9952	1	YBL005W-A	YBL006W-A	YBL005W	NON_SYNONYMOUS_CODING	0	0	0	0	0	0	0	0	0	0	0	0	0	0	0	0	0	0	0	0	0	0	0	0	0	0	0	0	0	0	0	0	0	0	0	0	0	0	0	0
chrII	222545	A	T	0.5077	0	tS(AGA)B	YBL005W	YBL005W-A	NON_SYNONYMOUS_CODING	0	0	0	0	0	0	0	0	0	0	0	0	0	0	0	0	0	0	0	0	0.5077	0	0	0	0	0	0	0	0	0	0	0	0	0	0	0	0	0	0	0
chrII	235130	A	G	10	49	YBL002W	YBL004W	NONE	NONE	0	0	0	0	0	0	0	0	0	0	0	0	0	0	0	0	0	0	0	0	10	0	0	0	0	0	0	0	0	0	0	0	0	0	0	0	0	0	0	0
chrII	238624	G	C	0.6475	0	YBL001C	YBR001C	NONE	NONE	0	0	0	0	0	0	0	0	0	0	0	0	0	0	0	0	0	0	0	0	0	0	0	0	0	0	0	0	0	0	0	0	0	0	0	0	0	0	0	0
chrII	255959	G	A	10	1	YBR009C	YBR011C	NONE	NONE	0	0	0	0	0	0	0	0	0	0	0	10	0	0	0	0	0	0	0	0	0	0	0	0	0	0	0	0	0	0	0	0	0	0	0	0	0	0	0	0
chrII	256261	C	T	0.9939	1	YBR010W	YBR011C	NONE	NONE	0	0	0	0	0	0	0	0	0	0	0	0	0	0	0	0	0	0	0	0	0	0	0	0	0	0	0	0	0	0	0	0	0	0	0	0	0	0	0	0
chrII	275719	G	A	10	1	YBR018C	YBR019C	NONE	NONE	0	0	0	0	0	0	0	0.0066	0	0	0	0	0	0	0	0	0	0	0	0.0091	0	0	0	0	0	0	0	0	10	0	0	0	0	0	0	0	0	0	0	0
chrII	283874	C	G	0.99	1	NONE	YBR021W	YBR022W	NON_SYNONYMOUS_CODING	0	0	0	0	0	0	0	0	0	0	0	0	0	0	0	0	0	0	0	0	0	0	0	0	0	0	0	0	0	0	0	0	0.0352	0	0	0	0.0062	0	0	0.99
chrII	286813	G	T	0.986	1	YBR024W	YBR022W	YBR023C	NON_SYNONYMOUS_CODING	0	0	0	0	0	0	0	0	0	0	0	0	0	0	0	0	0	0	0	0	0	0	0	0	0	0	0	0	0	0	0	0	0	0	0	0	0	0	0.0054	0.986
chrII	287653	G	A	10	1	YBR024W	YBR025C	YBR023C	SYNONYMOUS_CODING	0	0	0	0	0	0	0	0	0	0	0	0	0	0	0	0	0	0	0	0	0	0	0	0	0	0	0	0	0	0	0	0	0	0	0	0	0	0	0	0
chrII	288020	T	C	10	1	YBR023C	YBR025C	NONE	NONE	0	0	0	0	0	10	0	0	0	0	0	0	0	0	0	0	0	0	0	0	0	0	0	0	0	0	0	0	0	0	0	0	0	0	0	0	0	0	0	0
chrII	288028	C	T	0.98	1	YBR023C	YBR025C	NONE	NONE	0	0	0	0	0	0	0	0	0	0	0	0	0	0	0	0	0	0	0	0	0	0	0	0	0	0	0	0	0	0	0	0	0	0	0	0	0	0	0	0.98
chrII	288714	C	T	10	1	YBR024W	YBR025C	NONE	NONE	0	0	0	0	0	0	0	0	0	0	0	0	0	0	0	0	0	0	0	0	0	0	0	0	0	0	0	0	0	0	0	0	0	0	0	0	0	0	0	0
chrII	290083	T	A	0.9907	1	YBR023C	YBR025C	YBR024W	SYNONYMOUS_CODING	0	0.9907	0	0	0	0	0	0	0	0	0	0	0	0	0	0	0	0	0	0	0	0	0	0	0	0	0	0	0	0	0.0667	0	0	0	0	0	0	0	0	0
chrII	300571	T	A	10	1	YBR032W	YBR030W	YBR031W	NON_SYNONYMOUS_CODING	0	0	0	0	0	0	0	0	0	0	0	0	0	0	0	0	0	0	0	0	0	0	0	0	0	0	0	0	0	0	0	0	0	0	0	0	0	0	0	0
chrII	314960	T	A	10	1	YBR039W	YBR038W	NONE	NONE	0	0	0	0	0	0	0	0	0	0	0	0	0	0	0	0	0	0	0	0	0	0	0	0	0	0	0	0	0	0	0	0	0	0	0	0	0	0	0	10
chrII	328119	G	T	10	1	tV(UAC)B	YBR045C	NONE	NONE	0	0	0	0	0	0	0	0	0	0	0	0	0	0	0	0	0	0	0	0	0	0	0	0	0	0	0	0	0	0	0	0	0	0	0	0	0	0	0	0
chrII	331782	G	T	10	1	YBR047W	YBR049C	NONE	NONE	0	0	0	0	0	0	0	0	0	0	0	0	0	0	0	0	0	0	0	0	0	0	0	0	0	0	0	0	0	0	0	0	0	0	0	0	0	0	10	0
chrII	332239	C	G	10	1	YBR048W	YBR049C	YBR047W	NON_SYNONYMOUS_CODING	0	0	0	0	0	0	0	0	0	0	0	0	0	0	0	0	0	0	0	0	0	0	0	0	0	0	0	0	0	0	0	0	0	0	0	0	0.005	0	0	0
chrII	344690	G	C	10	1	tL(UAA)B2	YBR054W	YBR055C	STOP_GAINED	0	0	0	0	0	0	0	0	0	0	0	0	0	0	0	0	0	0	0	0	0	0	0	0	0	0	0	0	0	0	0	0	0	0	0	0	0	10	0	0
chrII	347600	C	T	0.9831	1	tL(UAA)B2	YBR054W	NONE	NONE	0	0	0	0	0	0	0	0	0	0	0	0	0	0	0.9831	0	0	0	0	0	0	0	0	0	0	0	0	0	0	0	0	0	0	0	0	0	0	0	0	0
chrII	350860	G	A	10	1	YBR056W-A	YBR056C-B	tQ(UUG)B	EXON	0	0	0	0	0	0	0	0	0	10	0	0	0	0	0	0	0	0	0	0	0	0	0	0	0	0	0	0	0	0	0	0	0	0	0	0	0	0	0	0
chrII	354233	T	A	10	1	YBR057C	YBR058C-A	YBR058C	NON_SYNONYMOUS_CODING	0	0	0	0	0	0	10	0	0	0	0	0	0	0	0	0	0	0	0	0	0	0	0	0	0	0	0	0	0	0	0	0	0	0	0	0	0	0	0	0
chrII	355993	T	A	10	1	YBR057C	YBR058C-A	YBR058C	NON_SYNONYMOUS_CODING	0	0	0	0	0	0	0	0	0	0	0	0	0	0	0	0	0	0	0	0	0	0	0	0	0	0	0	0	0	0	0	0	0	0	0	0	0	0	0	0
chrII	356625	G	C	10	1	YBR058C-A	YBR059C	NONE	NONE	0	0	0	0	0	0	0	0	0	0	0	0	0	0	0	0	0	0	0	0	0	0	0	0	0	0	0	0	0	0	0	0	0	0	0	0	0	0	0.0062	0
chrII	358236	T	C	10	1	YBR058C-A	YBR060C	YBR059C	SYNONYMOUS_CODING	0	0	0	0	0	0	0	0	0	0	0	0	0	0	0	0	0	0	0	0	0	0	0	0	0	0	0	0	0	0	0	0	0	0	0	10	0	0	0	0
chrII	361900	T	C	10	1	YBR059C	YBR061C	YBR060C	NON_SYNONYMOUS_CODING	0	0	0	0	0	0	0	0	0	0	0	0	0	0	0	0	0	0	0	0	0	0	0	0	0	0	0	0	0	10	0.0097	0	0	0	0	0	0	0	0	0
chrII	363575	A	G	10	1	YBR060C	YBR061C	NONE	NONE	0	0	0	0	0	0	10	0	0	0	0	0	0	0	0	0	0	0	0	0	0	0	0	0	0	0	0	0	0	0	0	0.0059	0	0	0.0058	0	0	0	0	0
chrII	364147	T	C	10	1	YBR060C	YBR061C	NONE	NONE	0	0	0	0	0	0	0	0	0	0	0	0	0	0	0	0	0	0	0	0	0	0	0	0	0	0	0	0	0	0	0	0	0	0	0	0	0	0	0	0
chrII	367111	A	G	0.99	1	YBR062C	YBR065C	YBR063C	SYNONYMOUS_CODING	0	0	0	0	0	0	0	0	0	0	0	0	0	0	0	0	0	0	0	0	0	0	0	0	0	0	0	0	0	0	0	0	0	0	0	0	0	0	0	0
chrII	369236	T	G	10	1	YBR063C	YBR066C	YBR065C	SYNONYMOUS_CODING	0	0	0	0	0	0	0	0	0	0	0	0	0	0	0	0	0	0	0	0	0	0	0	0	0	0	0	0	0	0	0	0	0	0	0.0081	0	0	0	0	0
chrII	373791	G	T	10	1	YBR067C	YBR068C	NONE	NONE	0	0	0	0	0	0	0	0	0	0	0	0	0	0	0	0	0	10	0	0	0	0	0	0	0	0	0	0	0	0	0	0	0	0	0	0	0	0	0	0
chrII	373892	G	C	0.991	1	YBR067C	YBR069C	YBR068C	NON_SYNONYMOUS_CODING	0	0	0	0	0	0	0	0	0	0	0	0	0	0	0.0052	0	0	0	0	0	0	0	0	0	0	0	0	0	0	0	0	0	0	0	0	0	0	0	0	0
chrII	374073	G	C	0.5826	0	YBR067C	YBR069C	YBR068C	NON_SYNONYMOUS_CODING	0	0	0	0	0	0	0	0	0	0	0	0	0	0	0	0	0	0	0	0	0	0	0	0	0	0	0	0	0	0	0	0	0	0	0	0	0	0	0	0
chrII	374557	T	C	10	1	YBR067C	YBR069C	YBR068C	SYNONYMOUS_CODING	0	0	0	0	0	0	0	0	0	0	0	0.0087	0	0	0	0	0	0	0	0	0	0	0	0	0	0	0	0	10	0	0	0	0.0066	0	0	0	0	0	0	0
chrII	380097	T	A	10	1	YBR070C	YBR072C-A	NONE	NONE	0	0	0	0	0	0	0	0	0	0	0	0	0	0	0	0	0	0	0	0	0	0	0	0	0	0	0	0	0	0	0	0	0	0	0	0	0	0	0	0
chrII	380697	A	G	10	2	YBR070C	YBR072C-A	YBR071W	NON_SYNONYMOUS_CODING	0	0	0	0	0	0	0.0061	0	0	0	0	0	0	0	0	0	0	0	0	0	0	0	0	0	0	0	0	0	0	0	0	0	0	0	0	0	0	0	0	0
chrII	381764	G	C	0.4365	0	YBR072W	YBR071W	NONE	NONE	0	0	0	0	0	0	0	0	0	0	0	0	0	0	0	0	0	0	0	0	0	0	0	0	0	0	0	0	0	0	0	0	0	0	0	0	0	0	0	0
chrII	383013	G	T	10	1	YBR073W	YBR072W	YBR072C-A	NON_SYNONYMOUS_CODING	0	0	0	0	0	0	0	0	0	0	0	0	0	0	0	0	0	0	0	0	0	0	0	0	0	0	0	0	0	0	0.0088	0	0	0	0	0	0	0	0	0
chrII	387629	C	A	10	1	YBR076W	YBR073W	YBR074W	NON_SYNONYMOUS_CODING	0	0	0.0049	0	0	0	0	0	0	0	0	0	0	0	0	0	0	0	0	0	0	0	0	0	0	0	0.0046	0	0	0	0	0	0	0	0	0	0	0	0	0
chrII	388152	T	G	10	1	YBR076W	YBR073W	YBR074W	STOP_GAINED	0	0	0	0	0	0	0	0	0	0	0	0	0	0.0052	0	0	0	0	0	0	0	0	0	0	0	0	0	0	0	0	0	0	0	0	0	0	0	0	0	0
chrII	394293	A	G	0.9953	1	YBR077C	YBR079C	YBR078W	SYNONYMOUS_CODING	0	0	0	0	0	0	0	0	0	0	0	0	0	0	0.0044	0	0	0	0	0	0	0	0	0	0	0	0	0	0	0	0	0	0.0042	0	0	0	0	0	0	0
chrII	398208	C	G	10	1	NONE	YBR080C	YBR079C	NON_SYNONYMOUS_CODING	0	0	0	0	0	0	0	0	0	10	0	0	0	0	0	0	0	0	0	0	0	0	0	0	0	0	0	0	0	0	0	0	0	0	0	0	0	0	0	0
chrII	403328	T	A	10	1	YBR080C	YBR082C	YBR081C	NON_SYNONYMOUS_CODING	0	0	0	0	0	10	0.0053	0	0	0	0	0	0	0	0	0	0	0	0	0	0	0	0	0	0	0	0	0	0	0	0	0	0	0	0	0	0	0	0	0
chrII	407683	G	T	10	1	YBR082C	tD(GUC)B	NONE	NONE	0	0	0	0	0	0	0	0	0	0	0	0	0	0	0	0	0	0	0	0	0	0	0	0	0	0	0	0	0	0	0	0	0	0	0	0.0078	0	0	0	0
chrII	410638	A	T	10	1	YBR084W	YBR083W	NONE	NONE	0	0	0	0	0	0	0	0	0	0	0	0	0.0061	0	0	0	0	0	0	0	0.0081	0	0	0	10	0	0	0	0	0	0	0	0	0	0	0	0	0	0	0
chrII	415015	C	A	10	1	YBR085W	YBR084W	YBR084C-A	INTRON	0	0	0	0	0	0	0	0	0	0	0	0	0.0046	0	0	0	0	0	0	0.0078	0	0	0	0	0.0045	0	0	0	0	0	0	0	0	0	0	0	0	0	0	0
chrII	433854	T	A	10	1	YBR096W	YBR095C	YBR094W	NON_SYNONYMOUS_CODING	0	0	0	0	0	0	0	0	0	0	0	0	0	0	0	0	0	0	0	0	0	0	0	0	0	0	0	0	0	0	0	0	0	0	0	0	0	0	0	0
chrII	443113	A	T	10	1	YBR103W	YBR101C	YBR098W	NON_SYNONYMOUS_CODING	0	0	0	0	0	0	0	0	0	0	0	10	0	0	0	0	0	0	0	0	0	0	0	0	0	0	0	0	0	0	0	0	0	0	0	0	0	0	0	0
chrII	443253	T	A	10	1	YBR103W	YBR101C	YBR098W	NON_SYNONYMOUS_CODING	0	0	0	0	0	0	0	0	0	0	0	0	0	0	0	0	0	0	0	0	0	0	0	0	0	0	0	0	0	0	0	0	0	0	0	0	0	0	0	0
chrII	443310	C	A	0.9933	1	YBR099C	YBR101C	YBR098W	NON_SYNONYMOUS_CODING	0	0	0	0	0	0	0	0	0	0	0	0	0	0	0	0	0	0	0	0	0	0	0	0	0.9933	0	0	0	0	0	0	0	0	0	0	0	0	0	0	0
chrII	446463	A	C	10	1	YBR103W	YBR103C-A	YBR102C	SYNONYMOUS_CODING	0	0	0	0	0	0	0	0	0	0	0	0	0	0	0	0	0	0	0	0	0	0	0	0	0	0	0	10	0	0	0	0.638	0	0	0	0	0	0	0	0
chrII	446463	A	G	10	1	YBR103W	YBR103C-A	YBR102C	SYNONYMOUS_CODING	0	0	0	0	0	0	0	0	0	0	0	0	0	0	0	0	0	0	0	0	0	0	0	0	0	0	0	0	0	0	0	0	0	0	0	0	0	0	0	0
chrII	453733	A	G	10	1	YBR108W	YBR107C	NONE	NONE	0	0	0	0	0	0	0	0	0	0	0	0	0	0	0	0	0	0	0	0	0	0	0	0	0	0	0	0	0	0	0	0	0	10	0	0	0	0	0	0
chrII	456350	A	G	0.9885	1	YBR107C	YBR109C	YBR108W	NON_SYNONYMOUS_CODING	0	0	0	0	0	0	0	0	0	0	0	0	0	0	0	0	0	0	0	0	0	0	0	0	0	0	0	0.0066	0	0	0	0	0	0	0	0	0	0	0	0
chrII	457199	A	C	0.8384	1	YBR109W-A	YBR109C	YBR108W	NON_SYNONYMOUS_CODING	0	0	0	0	0	0	0	0	0	0	0	0	0	0	0	0	0	0	0	0	0	0	0	0	0	0	0	0	0	0	0	0	0	0	0	0	0	0	0	0
chrII	460894	A	T	10	1	YBR111W-A	YBR111C	NONE	NONE	0	0	0	0	0	0	0	0	0	0	0	0	0	0	0	0	0	0	0	0	0	0	0	0	0	10	0	0	0	0	0	0	0	0	0	0	0	0	0	0
chrII	465972	G	T	10	1	YBR112C	YBR111W-A	YBR113W	NON_SYNONYMOUS_CODING	0	0	0	0	0	0	0	0	0	0	0	0	0	0	0	0	0	0	0	0	0	0	0	10	0	0	0	0	0	0	0	0	0	0	0	0	0	0	0	0
chrII	479615	T	A	10	1	YBR117C	YBR118W	YBR119W	SYNONYMOUS_CODING	0	0	0	0	0	0	0	0	0	0	0	0	0	0	0	0	0	0	0	0	0	0	0	0	0	0	0	0	0	0	0	0	0	0	0	0	0	0	0	0
chrII	485006	A	C	0.425	0	YBR122C	YBR125C	YBR123C	NON_SYNONYMOUS_CODING	0	0	0	0	0	0	0	0	0	0	0	0	0	0	0	0	0	0	0	0	0	0	0	0	0	0	0	0	0	0	0	0	0	0	0	0	0	0	0	0
chrII	485053	T	A	10	1	YBR122C	YBR125C	YBR123C	NON_SYNONYMOUS_CODING	0	0	0	0	0	0	0	0	0	0	0	0	0	0	0	0	0	0	0	0	0	0	0	0	0	0	0	0	0	0	0	0	0	0	0	0	0	0	10	0
chrII	491045	G	A	10	1	YBR126C	YBR127C	YBR126W-A	NON_SYNONYMOUS_CODING	0	0	0	0	0	0	0	0	0	0	0	0	0	0	0	0	0	0	0	0	0	0	0	0	0	0	0	0	0	10	0	0	0	0	0	0	0	0	0	0
chrII	492454	G	T	10	1	YBR126C	YBR128C	YBR127C	NON_SYNONYMOUS_CODING	0	0	0	0	0	0	0	0	0	0	0	0	0	0	0	0	0	0	0	0	0	0	0	0	0	0	0	0	0	0.0062	0	0	0	0	0	0	0	0	0	0
chrII	493931	A	T	10	1	YBR127C	YBR129C	YBR128C	STOP_GAINED	0	0	0	0	0	0	0	0	0	0	0	0	0	0	0	0	0	0	0	0	0	0	0	0	0	0	0	0	0	0	0	0	0	0	0	0	0	0	0	0
chrII	496408	T	A	0.9933	1	YBR131W	YBR131C-A	YBR130C	NON_SYNONYMOUS_CODING	0	0	0	0	0	0	0	0	0	0	0	0	0	0	0	0	0	0	0	0	0	0	0	0	0	0	0	0	0	0	0	0	0	0	0	0	0	0	0	0
chrII	504648	T	A	10	1	YBR135W	YBR134W	NONE	NONE	0	0	0	0	0	0	0	0	0	0	0	0	0	0	0	0	0	0	0	0	0	0	0	0	0	0	0	0	0	0	0	0	0	0	10	0	0	0	0	0
chrII	508347	G	T	10	1	YBR133C	YBR135W	YBR136W	NON_SYNONYMOUS_CODING	0	0	0	0	0	0	0	0	0	0	0	0	0	0	0	0	0	0	0	0	0	0	0	10	0	0	0	0	0	0	0	0	0	0	0	0	0	0	0	0.0078
chrII	508993	A	G	0.9935	1	YBR137W	YBR135W	YBR136W	NON_SYNONYMOUS_CODING	0	0	0	0	0	0	0	0	0	0	0	0	0	0	0	0	0	0	0	0	0	0	0	0	0	0	0	0	0	0	0	0	0	0	0	0	0	0	0	0
chrII	514358	C	G	10	1	YBR139W	YBR137W	YBR138C	NON_SYNONYMOUS_CODING	0	0	0	0.006	0	0	0	0	0	0	0	0	0	0	0	0	0	0	0	0	0	0	0	0	0	0	0	0	0	0	0	0	0	0	0	0	0	0	0	0
chrII	515738	T	C	0.8671	1	YBR138C	YBR140C	YBR139W	SYNONYMOUS_CODING	0	0	0	0	0	0	0	0	0	0	0	0	0	0	0	0	0	0	0	0	0	0	0	0	0	0	0	0	0	0	0	0	0	0	0	0	0	0	0	0
chrII	516322	G	A	0.9943	1	YBR138C	YBR140C	YBR139W	NON_SYNONYMOUS_CODING	0	0	0	0	0	0	0	0	0	0	0	0	0	0	0	0	0	0	0	0	0	0	0	0	0	0	0	0	0	0	0	0	0	0	0	0	0	0	0	0
chrII	520421	C	T	10	9	NONE	YBR139W	YBR140C	NON_SYNONYMOUS_CODING	0	0	0	0	0	0.0035	0	10	10	10	0	0	0	0	10	10	10	0.994	10	10	0	0	0	0	0	0.0064	0	0	0	0	0	0	0.0049	0	0	0	0	0	0	0
chrII	521568	G	A	10	1	NONE	YBR139W	YBR140C	SYNONYMOUS_CODING	0	0	0	0	0	0	0	0	0	0	0	0	0	0	0	0	0	0	0	0	0	0	0	0	0	0	0	0	0	0	0	0	0	0	0	0	0	0	0	0
chrII	525376	G	A	10	1	YBR141W-A	YBR141C	YBR140C	NON_SYNONYMOUS_CODING	0	0	0	0	0	0	0	0	0	0	0	0	0	0	0	0	0	0	0	0	0	0	0	0	0	0	0	0	0	0	0	0	0	0	0	0	0	0	0	0
chrII	532846	C	A	10	1	YBR143C	YBR144C	NONE	NONE	0	0	0	0	0	0	0	0	0	0	0	0	0	0	0	0	0	0	0	0	0	0	0	0	0	0	0	0	0	0	0	0	0	0	0	0	0	0	0	0
chrII	538883	A	G	10	1	YBR149W	YBR147W	YBR148W	SYNONYMOUS_CODING	0	0	0	0	0	0	0	0	0	0	0	0	0	0	0	0	0	0	0	0	0	0	0	0	0	0	0	0	0	0	0	0	0	0	0	0	0	0	0	0
chrII	546695	A	G	10	1	YBR153W	YBR151W	YBR152W	NON_SYNONYMOUS_CODING	0	0	0	0	0	0	0	0	0	0	0	0	10	0.0461	0	0	0	0	0	0	0	0	0	0	0	0	0	0	0	0	0	0	0	0	0	0	0	0	0	0
chrII	713619	A	T	0.994	1	YBR245C	YBR246W	YBR247C	NON_SYNONYMOUS_CODING	0	0	0	0	0	0	0	0	0	0	0	0	0	0	0.994	0	0	0	0	0	0	0	0	0	0	0	0	0	0	0	0	0	0	0	0	0	0	0	0	0
chrII	714562	G	C	10	1	YBR247C	YBR248C	NONE	NONE	0	0	0	0	0	0	0	0	0	0	0	0	0	0	0	0	0	0	0	0	0	0	0	10	0	0	0	0	0	0	0	0	0	0	0	0	0	0	0	0
chrII	721526	G	C	10	1	YBR252W	YBR250W	YBR251W	NON_SYNONYMOUS_CODING	0	0	0	0	0	0	0	0	0	0	0	0	0	0	0	0	0	0	0	0	0	0	0	0	0	0	0	0	0	0	0	0	0	0	0	0	0	0	0	0
chrII	728112	G	A	10	1	YBR256C	YBR255W	NONE	NONE	0	0	0	0	0	0	0	10	0	0	0	0	0	0	0	0	0	0	0	0	0	0	0	0	0	0	0	0	0	0	0	0	0	0	0	0	0	0	0	0
chrII	730864	C	T	0.9939	1	YBR258C	YBR257W	YBR259W	SYNONYMOUS_CODING	0	0	0	0	0	0	0	0	0	0	0	0	0	0	0	0	0	0	0	0	0	0	0	0	0	0	0	0	0	0	0	0	0	0	0.007	0	0	0	0	0
chrII	731329	A	G	10	1	YBR258C	YBR260C	YBR259W	SYNONYMOUS_CODING	0	0	0	0	0	0	0	0	0	0	0	0	0	0	0	0	0	0	0	0	0	0	0	0	0	0	0	0	0	0	0	0	0	0	0	0	0	0	0	0
chrII	737373	G	T	0.9932	1	YBR265W	YBR264C	YBR263W	NON_SYNONYMOUS_CODING	0	0	0	0.9932	0	0.0046	0	0	0	0	0	0	0	0	0	0	0	0	0	0	0	0	0	0	0	0	0	0	0	0	0	0	0	0	0	0	0	0	0	0
chrII	739020	A	G	10	1	YBR264C	YBR266C	YBR265W	SYNONYMOUS_CODING	0	0	0	10	0	0	0	0	0	0.0064	0	0	0	0	0	0	0	0	0	0	0	0	0	0	0	0	0	0	0	0	0	0	0	0	0	0	0	0	0	0
chrII	742194	G	C	0.9935	1	YBR266C	YBR270C	YBR269C	NON_SYNONYMOUS_CODING	0	0	0	0	0	0	0	0	0	0	0	0	0	0	0	0	0	0	0	0	0	0	0	0	0	0	0	0	0	0	0	0	0	0	0	0	0	0	0	0
chrII	753950	A	G	10	1	YBR273C	YBR274W	YBR275C	NON_SYNONYMOUS_CODING	0	0	0	0	0.0057	0	10	0	0	0	0	0	0	0	0	0	0	0	0	0	0	0	0	0	0	0	0	0	0	0	0	0	0	0	0	0	0	0	0	0
chrII	766376	G	T	10	1	YBR280C	YBR283C	YBR281C	NON_SYNONYMOUS_CODING	0	0	0	0	0	0	0	0	10	0	0.0059	0	0	0	0	0	0	0	0	0	0	0	0	0	0	0	0	0	0	0	0	0	0	0	0	0	0	0	0	0
chrII	767546	G	T	10	1	YBR282W	YBR283C	YBR281C	NON_SYNONYMOUS_CODING	0	0	0	0	0	0.0053	0.0118	0	0	0	0	0	0	0	0	0	0	0	0	0	0	0	0	0	0	0	0	0	0.0079	0	0	0	0	0	0	0	0	0	0	0
chrII	771063	T	C	10	1	YBR284W	YBR282W	NONE	NONE	0	0	0	0	0	0	0	0	0	0	0	0	0	0	0	0	0	0	0	0	0	0	0	0	0	0	0	0	0	0	0	0	0	0	0	0	0	0	0	0
chrII	773616	C	A	0.9494	1	YBR285W	YBR288C	YBR284W	SYNONYMOUS_CODING	0	0	0	0	0	0	0	0	0	0	0	0	0	0	0	0.0059	0	0	0	0	0	0	0	0	0	0	0	0	0	0	0.9494	0	0	0	0.0088	0.0061	0	0	0	0
chrII	774490	T	C	10	1	YBR286W	YBR285W	NONE	NONE	0	0	0	0	0	0	0	0	0	0.0091	0	0	0	0	0	0	0	0	0	0	0	0	0	0	0	0	0	0	0	0	0	0	0	10	0	0	0	0.0064	0	0
chrII	779129	T	A	0.9739	1	YBR289W	YBR287W	YBR288C	NON_SYNONYMOUS_CODING	0	0	0	0	0	0	0	0.9739	0	0	0	0	0	0	0	0	0	0	0	0	0	0	0	0	0	0	0	0	0	0	0	0	0	0	0	0	0	0	0	0
chrII	779960	C	A	10	1	YBR288C	YBR287W	YBR289W	NON_SYNONYMOUS_CODING	0	0	0	0	0	0	0	0	0	0	0	0	0	0	0	0	0	0	0	0	0	0	0	0	0	0	0	0	0	0	0	0	0	0	0	0	0	10	0	0
chrII	781425	A	G	10	1	YBR290W	YBR291C	YBR289W	NON_SYNONYMOUS_CODING	0	0	0	0	0	0	0	0	0	0	0	0	0	0	10	0	0	0	0	0	0	0	0	0	0	0	0	0	0	0	0	0	0	0	0	0	0	0	0	0
chrII	795399	A	G	0.5379	0	NONE	YBR296C	YBR295W	NON_SYNONYMOUS_CODING	0	0	0	0	0	0	0	0	0	0	0	0	0	0	0	0	0.5379	0	0	0	0	0	0	0	0	0	0	0	0	0	0	0	0	0	0	0	0	0	0	0
chrII	800184	C	G	0.9605	1	YBR297W	YBR298C	YBR296C-A	NON_SYNONYMOUS_CODING	0	0	0	0	0	0	0	0	0	0	0	0	0	0	0	0	0	0	0	0	0	0	0	0	0	0.9605	0	0	0	0	0	0	0.0087	0	0	0	0	0	0	0
chrII	800380	G	C	0.9595	1	YBR297W	YBR298C	NONE	NONE	0	0	0	0	0	0	0	0	0	0	0	0	0	0.9595	0	0	0	0	0	0	0	0	0	0	0	0	0	0	0	0	0	0	0	0.0072	0	0	0	0	0	0
chrII	805046	C	T	10	1	YBR299W	YBR297W	YBR298C-A	NON_SYNONYMOUS_CODING	0	0	0	0	0	0	0	0	0	0	0	0	0	0	0	0	0	0	0	0	0	0	0	0	0	0.0078	0	0	0	0	0	0.007	0	0	0	0	0	0.0067	0	0
chrIII	2167	T	C	10	1	YCL074W	YCL076W	YCL075W	EXON	0	0	0	0	0	0	0	0	0	0	0	0	0	0	0	0	0	0	0	0.0086	0	0	0	0	0	0	0	0	0	0	0	0	0	0	0	0	0	0	0	0
chrIII	3565	T	A	10	1	NONE	YCL075W	YCL074W	EXON	0	0	0	0	0	0	0	0	0	0	0	0	0	0	0	0	0	0	0	0	0	0	0	0	0	0	0	0	0	0	0	0	0	0	0	0	0	0	0	0
chrIII	4720	T	A	0.9938	1	YCL069W	YCL074W	NONE	NONE	0	0	0	0.0067	0	0	0	0	0	0	0	0	0	0	0	0	0	0	0	0	0	0	0	0	0	0	0	0	0	0	0	0	0	0	0	0	0	0	0	0
chrIII	4846	C	A	10	1	YCL069W	YCL074W	NONE	NONE	0	0	0	0	0	0	0	0	0	0	0	0	0	0	0	0	0	0	0	0	0	0	0	0	0	0	0	0	0	0	0.0056	0	0	0	0	0	0.0054	0	0	0
chrIII	8192	T	C	0.9841	1	YCL069W	YCL068C	YCL073C	SYNONYMOUS_CODING	0	0	0	0	0	0	0	0	0	0	0	0	0	0	0	0	0	0	0	0	0	0.9841	0	0	0	0	0	0	0	0	0	0	0	0	0	0	0	0	0	0
chrIII	8207	A	G	0.4821	0	YCL069W	YCL068C	YCL073C	SYNONYMOUS_CODING	0.0095	0	0	0	0	0	0	0	0	0	0	0	0	0	0	0	0	0	0	0	0	0	0	0	0	0	0	0	0	0	0	0	0	0	0	0	0	0	0	0
chrIII	14226	C	G	10	1	YCL067C	YCL065W	NONE	NONE	0	0	0	0.0065	10	0	0	0	0	0	0	0	0	0	0	0	0	0	0	0	0	0	0	0	0	0	0	0	0	0	0	0	0	0	0	0	0	0	0	0
chrIII	14595	C	G	0.602	0	YCL067C	YCL065W	NONE	NONE	0	0	0	0	0	0	0	0	0	0	0	0	0	0	0	0	0	0	0	0	0.602	0	0	0	0	0	0	0	0	0	0.0065	0	0	0	0	0	0	0	0	0
chrIII	15569	G	C	0.6875	0	YCL063W	YCL064C	NONE	NONE	0	0	0	0	0	0	0	0	0	0	0	0	0	0	0	0	0	0	0	0	0	0	0	0	0	0	0	0	0	0	0	0	0	0	0	0	0	0	0	0
chrIII	19564	A	G	0.6927	0	YCL064C	YCL063W	YCL061C	NON_SYNONYMOUS_CODING	0	0	0	0	0	0	0	0	0	0	0	0	0	0	0	0	0	0	0	0	0	0	0	0	0	0	0	0	0	0	0	0	0	0	0	0	0	0	0	0
chrIII	30123	G	A	10	1	YCL054W	YCL055W	NONE	NONE	0	0	0	0	10	0	0	0	0	0	0	0	0	0	0	0	0	0	0	0	0	0	0	0	0	0	0	0	0	0	0	0	0	0	0	0	0	0	0	0
chrIII	30599	G	A	0.993	1	YCL054W	YCL055W	NONE	NONE	0	0	0	0	0.993	0	0	0	0	0	0	0	0	0	0	0	0	0	0	0	0	0	0	0	0	0	0	0	0	0	0.0058	0	0	0	0	0	0	0	0	0
chrIII	33372	G	C	0.938	1	YCL051W	YCL052C	YCL054W	NON_SYNONYMOUS_CODING	0	0	0	0	0	0	0	0	0	0	0	0	0	0.938	0	0	0	0	0	0	0	0	0	0	0	0	0	0	0	0	0	0.0094	0	0	0	0	0	0	0	0
chrIII	56125	A	T	0.8667	1	YCL036W	YCL039W	YCL038C	NON_SYNONYMOUS_CODING	0	0	0	0	0	0	0	0	0	0	0	0	0	0	0	0	0	0	0.8667	0	0	0	0	0	0	0	0	0	0	0	0	0	0	0	0	0	0	0	0	0
chrIII	58107	C	G	10	1	YCL036W	YCL035C	YCL037C	NON_SYNONYMOUS_CODING	0	0	0	0	0	0	0	0	0	0	0	0	0	0	0	0	0	0	0	0	0	0	0	0	0	0	0	0	0	0	0	0	0	0	0	0	0	0	0	0
chrIII	63213	G	T	10	1	YCL032W	YCL034W	YCL033C	NON_SYNONYMOUS_CODING	0.004	0	0	10	0	0.0043	0	0	0	0	0	0	0	0	0	0	0	0	0	0	0	0	0	0	0	0	0.0044	0	0	0	0	0	0	0	0.0068	0	0	0	0	0
chrIII	68592	C	T	10	1	YCL030C	YCL029C	NONE	NONE	0	0	0	0	0	0	0	10	0.0062	0	0	0	0	0	0	0	0	0	0	0	0	0	0	0	0	0	0	0	0	0	0	0	0	0	0	0	0	0	0	0
chrIII	73656	G	C	10	1	YCL029C	YCL027W	YCL026C-B	NON_SYNONYMOUS_CODING	0	0	0	0	0	0	0	0	0	0	0	0	0	0	0	0	0	0	0	0	0	0	0	0	0	0	0	0	0	0	0	0	0	0	0	0	0	0	0	0
chrIII	74191	G	C	10	1	YCL026C-B	YCL026C-A	NONE	NONE	0	0	0	0	0	0	0	0	0	0	10	0	0	0	0	0	0	0	0	0	0	0	0	0	0	0	0	0	0	0	0	0	0	0	0	0	0	0	0	0
chrIII	75755	G	C	10	1	YCL026C-A	YCL025C	NONE	NONE	0	0	0	0	0	0	0	0	0	0	10	0	0	0	0	0	0	0	0	0	0	0	0	0	0	0	0	0	0	0	0	0	0	0	0	0	0	0	0	0
chrIII	85651	T	A	0.5114	0	tE(UUC)C	YCL021W-A	YCL019W	NON_SYNONYMOUS_CODING	0	0	0	0	0	0	0	0	0	0	0	0	0	0	0	0	0	0	0	0	0	0	0	0	0	0	0	0	0	0	0	0	0	0	0	0	0	0	0	0
chrIII	88006	A	G	10	2	tL(CAA)C	YCL020W	YCL019W	SYNONYMOUS_CODING	0.0939	0.2655	0.2086	0.2759	0.2914	0.2484	0.2436	0.2215	0.1	0.2609	0.2353	0.2643	0.2308	0.1854	0.1905	0.2556	0.1123	0.24	0.1981	0.3039	0.2118	0.2018	0.1691	0.1442	0.1973	0.2619	0.1595	0.2109	0.2314	0.244	0.1032	0.1846	0.2877	0.2165	0.2411	0.327	0.2183	0.2162	0.2321	0.1496
chrIII	90856	A	T	0.5174	0	tL(CAA)C	YCL019W	NONE	NONE	0	0	0	0.5174	0	0	0	0	0	0	0	0	0	0	0	0	0	0	0	0	0	0	0	0	0	0	0	0	0	0	0	0	0	0	0	0	0	0	0	0
chrIII	90924	G	C	0.5236	0	YCL018W	YCL019W	tL(CAA)C	INTRON	0	0	0	0	0	0	0	0	0	0	0	0	0	0	0	0	0	0	0	0	0	0	0	0	0	0	0	0	0	0	0	0	0	0	0	0	0	0	0	0
chrIII	93590	C	T	10	1	YCL014W	YCL016C	YCL017C	SYNONYMOUS_CODING	0	0	0	0	0	0	0	0	0	0	0	0	0	0	0	0	0	0	0	10	0	0	0	0	0	0	0	0	0	0	0	0	0	0	0	0	0	0	0	0
chrIII	96374	G	C	0.9543	1	YCL016C	YCL018W	YCL014W	NON_SYNONYMOUS_CODING	0	0	0	0	0	0	0	0	0.0039	0	0	0	0	0.9543	0	0	0	0	0	0	0	0	0	0	0	0	0	0	0	0	0	0	0	0	0	0	0	0	0	0
chrIII	106680	A	G	10	2	YCL005W-A	YCL007C	YCL008C	SYNONYMOUS_CODING	0	0	0	0	0	0	0	0	0	0	0	10	10	0.0192	0	0	0	0	0	0	0	0	0	0	0	0	0	0	0	0	0	0	0	0	0	0	0	0	0	0
chrIII	114221	G	T	10	1	YCR001W	YCL001W-B	NONE	NONE	0	0	0	0	0	0	0	0	0	0	0	0	0	0	0	0	0	0	0	0	0	0	0	0	0	0	0	0	0	0	0	0	0	0	0	0	0	0	0	0
chrIII	114431	A	G	10	1	YCR001W	YCL001W-B	NONE	NONE	0	0	0	0	0	0	0	0	0	0	0	0	0	0	0	0	0	0	0	0	0	0	0	0	0	0	0	0	0	0	0	0	0	0	0	0	0	0	0	0
chrIII	123596	C	A	10	1	YCR006C	YCR007C	tP(AGG)C	EXON	0	0	0	0	0	0	0	0	0	0	0	0	0	0	0	10	0	0	0	0	0	0	0.0114	0	0	0	0	0	0	0	0	0	0	0	0	0	0	0	0	0
chrIII	128666	C	T	10	1	YCR007C	tN(GUU)C	YCR008W	NON_SYNONYMOUS_CODING	0	0	0	0	0	0	0	0	0	0	0	0	0	0	0	0	0	0	0	0	0	0	0	0	0	0	0	0	10	0	0	0	0.0065	0	0	0	0	0	0	0
chrIII	131560	G	T	10	1	YCR009C	YCR010C	NONE	NONE	0	0	0	0	0	0	0	0	0	0	0.0055	0	0	0	0	10	0	0	0	0	0	0	0	0	0	0	0	0	0	0	0	0	0	0	0	0	0	0	0	0
chrIII	140847	T	A	10	1	YCR013C	YCR015C	YCR014C	STOP_GAINED	0	0	0	0	0	0	0	0	0	0	0	0	0	0	0	0	0	0	0	0	0	0	0	0	0	0	0	0	0	0	0	0	0	0	0	0	0	0	0	0
chrIII	142791	C	T	0.996	1	tG(GCC)C	YCR017C	NONE	NONE	0	0	0	0	0	0	0	0	0	0	0	0	0	0	0	0	0	0	0	0	0	0	0	0	0	0	0	0	0	0	0	0	0	0	0	0	0	0	0	0
chrIII	144820	T	C	0.9939	1	tG(GCC)C	YCR016W	YCR017C	NON_SYNONYMOUS_CODING	0	0	0	0	0	0	0	0	0	0	0	0	0	0	0	0	0	0	0	0	0	0	0	0	0	0	0	0	0	0	0	0	0	0	0	0	0	0	0	0
chrIII	147234	C	A	10	1	tM(CAU)C	YCR018C	YCR017C	NON_SYNONYMOUS_CODING	0	0	0	0	0	0	0	0	0	0	0	0	0	0	0	0	0	0	0	0	0	0	0	0	0	0	0	0	0	0	0	0	0	0	0	0	0	0	0	0
chrIII	163332	G	C	0.9514	1	YCR024C-A	YCR025C	NONE	NONE	0	0	0	0	0	0	0	0	0	0	0	0	0	0	0	0	0	0	0	0	0	0	0	0	0	0	0	0	0	0	0	0	0	0	0	0	0	0	0	0
chrIII	165663	T	G	0.9941	1	YCR025C	YCR027C	YCR026C	NON_SYNONYMOUS_CODING	0	0	0	0	0	0	0	0	0	0	0	0	0	0	0	0	0	0	0	0	0	0	0	0	0	0.0065	0	0	0	0	0	0	0	0	0	0	0	0	0	0
chrIII	168308	G	A	10	1	YCR027C	YCR028C	tQ(UUG)C	EXON	0	0	0	0	0	0	0	0	0	0	0	0	0	0	0	0	0	0	0	0	0.0083	0	0	0	0	0	0	0	0	0	0	0	0	0	0	0	0	0	0	0
chrIII	175785	G	T	10	1	snR65	YCR031C	YCR030C	NON_SYNONYMOUS_CODING	0	0	0	0	10	0	0	0	0	0	0	0	0	0	0	0	0	0	0	0	0	0	0	0	0	0	0	0	0	0	0	0.0053	0	0	0	0	0	0	0	0
chrIII	176998	T	A	10	1	snR65	YCR031C	NONE	NONE	0	0	0	0	0	0	0	0	0	0	0	0	0	0	0	0	0	0	0	0	0	0	0	0	0	0	0	0	0	0	0	0	0	0	0	0	0	0	0	0
chrIII	177610	A	T	10	1	YCR030C	snR65	YCR031C	SYNONYMOUS_CODING	0	0	0	0	0	0	0	0	0	0	0	0	0	0	0	0	0	0	0	0	0	0	0	0	0	0	0	0	0	0	0	0	0	0	0	0	0	0	0	0
chrIII	180363	T	A	10	1	snR189	snR65	YCR032W	STOP_GAINED	0	0	0	0	0	0	0	0	0	0	0	0	0	0	0	0	0	0	0	0	0	0	0	0	0	0	0	0.0059	0	0	0	0	0	0	0	0	0	0	0	0
chrIII	182483	A	G	10	1	snR189	NONE	YCR032W	NON_SYNONYMOUS_CODING	0	0	0	0	0	0	0	0	0	0	0	0	0	0	0	0	0	0	0	0	0	0	0	0	0	0	0.0042	0	0	0	0	0	0	0	0	0	0	0	0	0
chrIII	182586	T	C	0.9917	1	snR189	NONE	YCR032W	NON_SYNONYMOUS_CODING	0	0	0	0	0	0	0	0	0	0.0044	0	0	0	0	0	0.9917	0	0	0	0	0	0	0	0	0	0	0	0	0	0	0	0	0	0	0	0	0	0	0	0
chrIII	187881	C	G	10	1	YCR034W	YCR032W	YCR033W	NON_SYNONYMOUS_CODING	0	0	0	0	0	0	0	0	0	0	0	0	0	0	0	0	0	0	0	0	0	0	0	0	0	0	0	0	0	10	0	0	0	0	0	0	0	0	0	0
chrIII	188031	C	T	10	1	YCR034W	YCR032W	YCR033W	NON_SYNONYMOUS_CODING	0	0	0	0	0	0	0	0	0	0	0	0	0	0	0	0	0	0.0078	0	0	0	0	0	0	0	0	0	0	0	0	0	0.0068	0	0	0	0	0	0	0	0
chrIII	188435	G	T	10	1	YCR034W	YCR032W	YCR033W	NON_SYNONYMOUS_CODING	0	0	0	0	0.005	0	0	0	0	0	0	0	0	0.0089	0	0	0	0	0	0	0	0	0	0	0	0	0	0	0	0	0	0	0	0	0	0	0	0	0	0
chrIII	197277	A	T	10	1	YCR037C	YCR038C	NONE	NONE	0	0	0	0	0	0	0	0	0	0	0	0	0	0	0	0	0	0	0	0	0	0	0	0	0	0	0	0	0	0	0	0	0	0	0	0	0	0	10	0
chrIII	198530	T	C	10	1	YCR038W-A	YCR039C	YCR038C	NON_SYNONYMOUS_CODING	0	0	0	0	0	0	0	0	0	0	0	0	0	0	0	0	0	0	0	0	0	0	0	0	0	0	0	0	0	0	0	0	0	0	0	0	0	0	0	0
chrIII	204725	G	T	0.8462	1	YCR045W-A	YCR043C	YCR042C	SYNONYMOUS_CODING	0	0	0	0	0	0	0	0	0	0	0	0	0	0	0	0	0.0033	0	0.0075	0	0	0	0	0	0	0	0	0	0	0	0	0	0	0	0	0	0	0	0	0
chrIII	205172	T	A	10	1	YCR045W-A	YCR043C	YCR042C	NON_SYNONYMOUS_CODING	0	0	0	0	0	0	0	0	0	0	0	0	0	0	0	0	0	0	0	0	0	0	0	0	0	0	0	0	0	0	0	0	0.0258	0	0	0	0	0	0	10
chrIII	205654	T	C	10	1	YCR042C	YCR043C	NONE	NONE	0	0	0	0	0	0	0	0	0	0	0	0	0	0	0	0	0	0	0	0	0	0	0	0	0	0	0	0	0	0	0	0	0	0	0	0	0	0	0	0
chrIII	234731	T	A	0.9887	1	YCR068W	YCR066W	YCR067C	NON_SYNONYMOUS_CODING	0	0	0	0	0	0	0	0	0	0	0	0	0	0	0	0	0	0	0.9887	0	0	0	0	0	0	0	0	0	0	0	0	0	0	0	0	0	0	0	0	0
chrIII	237843	C	A	0.9933	1	YCR069W	YCR071C	YCR068W	NON_SYNONYMOUS_CODING	0	0	0	0	0	0	0	0	0	0	0	0	0	0	0	0	0	0	0	0	0	0.9933	0	0	0	0	0.0053	0	0	0	0	0	0	0	0	0.0052	0	0	0	0
chrIII	237857	T	G	0.9938	1	YCR069W	YCR071C	YCR068W	SYNONYMOUS_CODING	0	0	0	0	0	0	0	0	0	0	0	0	0	0	0	0	0	0	0	0	0	0.9938	0.0076	0	0	0	0	0	0	0	0	0	0	0	0	0	0	0	0	0
chrIII	247204	C	A	10	1	YCR073C	YCR075C	YCR073W-A	NON_SYNONYMOUS_CODING	0	0	0	0	0	0	0	0	0	0	0	0	0	0	0	0.0048	0	0	0	0	0	0	0	0	0	0	0	0	0	0	0	0	0	0	0	0	0.0051	0	0	0
chrIII	253959	A	T	0.9921	1	YCR081W	YCR081C-A	YCR079W	NON_SYNONYMOUS_CODING	0	0	0	0	0	0	0	0	0	0	0	0	0	0	0	0	0	0	0	0	0	0	0	0	0	0	0	0	0	0	0	0	0	0	0	0	0	0	0	0
chrIII	257403	G	T	10	1	YCR082W	YCR081C-A	YCR081W	NON_SYNONYMOUS_CODING	0	0	0	0	10	0	0	0	0	0	0	0	0	0	0	0	0	0	0	0	0	0	0	0	0	0	0	0	0	0	0	0	0.0049	0	0	0	0	0	0	0.0074
chrIII	258290	C	A	10	1	YCR082W	YCR081C-A	YCR081W	NON_SYNONYMOUS_CODING	0	0	0	0	0	0.0045	0	0	0	0	0	0	0	0	0	0	0	0	0	0	0	0	0	0	0	0	0	0	0	0	0	0	0	0.0043	0	0	0	0	0	0
chrIII	261333	A	G	10	1	YCR085W	YCR083W	YCR084C	NON_SYNONYMOUS_CODING	0	0	0	0	0	0	0	0	0	0	0	0	0	0	0	0	0	0	0	0	0	0	0	0	0	0	0	0	0	0	0	0	0	0	0	0	0	0	0	0
chrIII	265651	A	G	0.9859	1	YCR087C-A	YCR087W	YCR088W	NON_SYNONYMOUS_CODING	0	0	0.0063	0	0	0	0	0	0	0	0	0	0	0	0	0	0	0	0	0	0	0	0	0	0.006	0	0	0	0	0	0	0	0	0	0	0	0	0	0	0
chrIII	266131	A	C	10	1	YCR089W	YCR087W	YCR088W	NON_SYNONYMOUS_CODING	0	0	0	0	0	0	0	0	0	0	0	0	0	0	0	0	0	0	0	0	0	0	0	0	0	0	0	0	0	0	0	0	0	0	0	0	0	0	0	0
chrIII	266293	C	G	10	1	YCR089W	YCR087W	YCR088W	NON_SYNONYMOUS_CODING	0	0	0	0	0	0	0	0	0	0	0	0	0	0	10	0	0	0	0	0	0	0	0	0	0	0	0	0	0	0	0	0	0	0	0	0	0	0	0	0
chrIII	278940	T	C	10	1	YCR093W	YCR091W	YCR092C	NON_SYNONYMOUS_CODING	0	0	0	0	0	0	0	0	0	0	0	0	0	0	0	0	0	0	0	0	0	0	0	0	0	0	0	0	10	0	0	0	0	0	0	0	0	0	0	0
chrIII	280686	C	T	0.9773	1	YCR092C	YCR091W	YCR093W	SYNONYMOUS_CODING	0	0	0	0	0	0	0	0	0	0	0	0	0	0	0	0	0	0	0	0	0	0	0	0	0	0	0	0	0	0	0	0	0	0	0	0	0	0	0	0
chrIII	282760	T	C	10	1	YCR092C	NONE	YCR093W	SYNONYMOUS_CODING	0	0	0	0	0.005	0	0	0	10	0	0	0	0	0	0	0	0	0	0	0	0	0	0	0	0	0	0	0	0	0	0	0	0	0.0043	0	0	0	0	0	0
chrIII	285937	G	A	0.9877	1	YCR094W	YCR095C	YCR093W	NON_SYNONYMOUS_CODING	0	0	0	0	0	0	0	0	0	0	0	0	0	0	0	0	0	0	0	0	0	0	0	0	0	0	0	0	0	0.9877	0	0	0	0	0	0	0	0	0	0
chrIII	289247	A	G	10	1	YCR095W-A	YCR094W	YCR095C	SYNONYMOUS_CODING	0	0	0	0	0	0	0	0	0	0	0	0	0	0	0	0	0	0	0	0	0	0	0	0	0	0	0	0	0	0	0	0	0	0	0	0	0	0	0	0
chrIII	292122	A	C	0.9864	1	YCR097W	YCR096C	NONE	NONE	0	0	0	0	0	0	0	0	0	0	0	0	0	0	0	0	0	0	0	0	0	0	0	0	0.0065	0	0	0	0	0	0	0	0	0.0061	0	0	0	0	0	0
chrIII	292771	A	G	10	1	YCR097W	YCR096C	NONE	NONE	0	0	0	0	0	0	0	0	0	0	0	0	0	0	0	0	0	0	0	0	0	0	0	0	0	0	0	0	0	0	0	0	0	0	0	0	0	0	0	0
chrIII	292922	T	C	0.9901	1	YCR097W	YCR096C	NONE	NONE	0	0	0	0	0	0	0	0	0	0	0.008	0	0	0	0	0	0	0	0	0	0	0	0	0	0	0	0	0	0	0	0	0	0	0	0	0	0	0	0	0
chrIII	307041	C	G	10	1	YCR104W	YCR102W-A	NONE	NONE	0	0	0	0	0	0	0	0	0	0	0	0	0	0	0	0	0	0	0	0	0	0	0	0	0	0	0	0.007	10	0	0	0	0	0	0	0	0	0	0	0
chrIII	311894	C	T	10	1	YCR107W	YCR105W	YCR106W	NON_SYNONYMOUS_CODING	0	0	0	0	0	0	0	10	0	0.0069	0	0	0	0	0	0	0	0	0	0	0	0	0	0	0	0	0	0	0	0	0	0	0	0	0	0	0	0	0	0
chrIV	19769	A	C	10	1	YDL241W	YDL242W	NONE	NONE	0	0	0	0.006	0	0	0	0	0	0	0	0	10	0.0206	0	0	0	0	0	0	0	0	0	0	0	0	0	0	0	0	0	0	0	0	0	0	0	0	0	0
chrIV	22603	C	G	10	1	YDL240W	YDL241W	YDL240C-A	SYNONYMOUS_CODING	0	0	0	0	0	0	0	0	0	0	0	0	0	0	0	0	0	0	0	0	0	0	0	0	0	0	0	0	0	0	0	0	0	0	0	0	0	0	0	0
chrIV	24285	T	A	10	1	YDL240C-A	YDL239C	YDL240W	NON_SYNONYMOUS_CODING	0	0	0	0	0	0	0	0	0	0	0	0	0	0	0	0	0	0	0	0	0	0	0	0	0	0	0	0	0	0	0	0	0	0	0	0	0	0	0	0
chrIV	25867	A	T	10	1	YDL240C-A	YDL239C	YDL240W	SYNONYMOUS_CODING	0	0	0	0	0	0	0	0	0	0	0	0	0	0	10	0	0	0	0	0	0	0	0	0	0	0	0	0	0	0	0	0	0	0	0	0	0	0	0	0
chrIV	29373	C	A	10	49	YDL239C	YDL240W	YDL238C	NON_SYNONYMOUS_CODING	0.0046	0	0	0	0	0	0	0	0	0	0	0	0	0	0	0.0053	0	0	0	0	10	0	0	0	0	0	0	0	0.0092	0	0	0	0	0	0	0	0	0	0	0
chrIV	30975	A	T	10	1	YDL238C	YDL235C	YDL237W	STOP_GAINED	0	0	0	0	0	0	0	0	0	0	0	0	0	0	0	0	0	0	0	0	0	0	0	0	0	0	0	0	0	0	0	0	0	0	0	0	0	0	10	0
chrIV	32798	A	G	10	1	YDL238C	YDL235C	YDL236W	NON_SYNONYMOUS_CODING	0	0	0	0	0	0	0	0	0	0	0	0	0	0	0	0	0	0	0	0	0	0	0	0	0	0	0	0	0	0	0	0	0	0	0	0	0	0	0	0
chrIV	42435	G	T	0.614	0	YDL231C	YDL228C	NONE	NONE	0	0	0	0	0	0	0	0	0	0	0	0	0	0	0	0.0098	0	0	0	0	0	0	0	0	0	0	0	0	0	0	0	0	0	0	0	0	0	0	0	0
chrIV	44034	C	A	10	1	YDL229W	YDL230W	NONE	NONE	0	0	0	0	0	0	0	0	0	0	0	0	0.0065	0.0091	0	0	0	0	0	0	0	0	0	0	0	0	0	0	0	0	0	0	0	0	0	0	0	0	0	0
chrIV	47215	C	G	0.835	1	YDL228C	YDL229W	YDL227C	NON_SYNONYMOUS_CODING	0	0	0	0	0	0	0	0	0	0	0	0	0.0063	0	0	0	0	0	0	0	0	0	0	0	0	0	0	0	0	0	0	0	0	0	0	0	0	0	0	0
chrIV	53585	C	T	10	1	YDL226C	YDL224C	YDL225W	SYNONYMOUS_CODING	0	0	0	0	0	0	0	0	0	0	0	0	0	0	0	0	0	0	0	0	0	0	0	0	0	0	0	0	0	0	0	0	0	0	10	0	0	0	0	0
chrIV	69906	C	T	0.9921	1	YDL217C	YDL215C	YDL216C	NON_SYNONYMOUS_CODING	0	0	0.9921	0	0	0	0	0	0	0	0	0	0	0	0	0	0	0	0	0	0	0	0	0	0	0	0	0	0	0	0	0	0	0	0	0	0	0	0	0
chrIV	73826	C	G	0.9948	1	YDL216C	YDL214C	YDL215C	NON_SYNONYMOUS_CODING	0	0	0	0	0	0	0	0	0	0	0	0	0.9948	0.0279	0	0	0	0	0	0	0	0	0	0	0	0	0	0	0	0	0	0	0	0	0	0	0	0	0	0
chrIV	76085	A	G	0.9946	1	YDL215C	YDL213C	YDL214C	SYNONYMOUS_CODING	0	0	0	0	0	0	0	0	0	0	0	0	0	0	0	0	0	0	0	0	0	0	0	0	0	0	0	0	0	0	0	0	0	0	0	0	0	0	0	0
chrIV	83161	T	A	10	1	tG(GCC)D1	YDL209C	NONE	NONE	0	0	0	0	0	0	0	0	0	0	0	0	0	0	0	0	0	0	0	0	0	0	0	0	0	0	0	0	0	0	0	0	0	0	0	0	0	0	0	0
chrIV	84955	C	T	10	1	YDL208W	YDL209C	YDL210W	SYNONYMOUS_CODING	0	0	0	0	10	0	0	0	0	0	0	0	0	0	0	0	0	0	0	0	0	0	0	0	0	0	0	0	0	0	0	0	0	0	0	0	0	0	0	0
chrIV	85566	G	A	0.6391	0	YDL208W	YDL209C	YDL210W	SYNONYMOUS_CODING	0	0	0	0	0	0	0	0	0	0	0	0	0	0	0	0	0	0	0	0	0	0	0	0	0	0	0	0	0	0	0	0.6391	0	0	0	0	0	0	0	0
chrIV	91771	A	G	10	1	YDL204W	YDL205C	YDL206W	NON_SYNONYMOUS_CODING	0	0	0	0	0	0	0	0	0	0	0	0	0	0	0	0	0	0	0	0	0	0	0	0	0	0	0	0	0	0	0	0	0	0	0	0	0	0	0	0
chrIV	94380	A	G	0.9902	1	YDL204W	YDL203C	NONE	NONE	0	0	0	0	0	0	0	0	0	0	0	0	0	0	0	0	0	0	0	0	0	0	0	0	0	0	0	0	0	0	0	0	0	0	0	0	0	0	0	0
chrIV	109548	G	A	10	1	YDL194W	YDL196W	YDL195W	NON_SYNONYMOUS_CODING	0	0	0	0	0	0	0	0	0	0	0	0	0	0	0	0	0	0	0	0	0	0	0	0	0	0	0	0	0	0	0	0	0	0	0	0	0	0	0	0
chrIV	109746	C	A	0.9932	1	YDL194W	YDL196W	YDL195W	SYNONYMOUS_CODING	0	0	0	0	0	0	0	0	0	0	0	0	0	0	0	0	0	0	0	0	0	0	0	0	0	0	0	0	0	0	0	0	0	0	0	0	0	0	0	0
chrIV	113985	C	G	10	1	YDL193W	YDL195W	YDL194W	NON_SYNONYMOUS_CODING	0	0	0	0	0	0	0	0	0	0	0	0	0	0	0	10	0	0	0	0	0	0	0	0	0	0	0	0	0	0	0	0	0	0	0	0	0	0	0	0
chrIV	115559	A	G	0.9681	1	YDL192W	YDL194W	YDL193W	NON_SYNONYMOUS_CODING	0	0	0	0	0	0	0	0	0	0	0	0	0	0.9681	0	0	0	0	0	0	0	0	0	0	0	0	0	0	0	0	0	0	0	0	0	0	0	0	0	0
chrIV	124339	A	G	10	1	YDL186W	YDL189W	YDL188C	NON_SYNONYMOUS_CODING	0	0	0	10	0	0	0	0	0	0	0	0	0	0	0	0	0	0	0	0	0	0	0	0	0	0	0	0	0	0	0	0	0	0	0	0	0	0	0	0
chrIV	125788	G	T	10	1	YDL188C	YDL185C-A	YDL186W	NON_SYNONYMOUS_CODING	0	0	0	0	0	0	0	0	0	0	0	0	0	0	0	0	0	0	0	0	0	0	0	0	0	0	0	0	0	0	0	0	0	0	0	0	0	0	0	0
chrIV	130354	C	G	10	1	YDL182W	YDL184C	NONE	NONE	0	0	0	0	0	0	0	0	0	0	0	0	0	0	0	0	0	0	0	10	0	0.0058	0.0052	0	0	0	0	0	0	0	0	0	0	0	0	0	0	0	0	0
chrIV	136725	A	T	10	1	YDL179W	YDL181W	YDL180W	NON_SYNONYMOUS_CODING	0	0	0	0	0	0	0	0	10	0	0	0	0	0	0	0	0	0	0	0	0	0	0	0	0	0	0	0	0	0	0	0	0	0	0	0	0	0	0	0
chrIV	150801	T	C	0.995	1	YDL172C	YDL173W	YDL171C	NON_SYNONYMOUS_CODING	0	0	0	0	0	0	0	0	0	0	0	0	0	0	0	0	0	0	0	0	0	0	0	0	0	0	0	0	0	0	0	0	0.0058	0	0	0	0	0	0	0
chrIV	160803	T	A	10	1	YDL169C	YDL168W	NONE	NONE	0	0	0	0	0	0	0	0	0	0	0	10	0	0	0	0	0	0	0	0	0	0	0	0	0	0	0	0	0	0	0	0	0	0	0	0	0	0	0	0
chrIV	163336	A	T	0.9793	1	YDL167C	YDL166C	NONE	NONE	0	0	0	0	0	0	0	0	0	0	0	0	0	0	0	0	0	0	0	0	0	0	0	0	0	0	0	0	0	0	0	0	0	0.9793	0	0	0	0	0	0
chrIV	164939	G	A	10	9	YDL166C	YDL164C	NONE	NONE	0	0	0	0	0	0	0	0.9683	10	10	0	0	0	0	10	10	10	0.9839	10	10	0	0	0	0	0	0	0	0	0	0	0	0	0	0	0	0	0	0	0	0
chrIV	173437	A	G	0.7692	1	YDL159C-B	YDL158C	YDL159W	NON_SYNONYMOUS_CODING	0.0054	0	0	0	0	0	0	0	0	0	0.0066	0	0	0	0	0	0	0	0	0	0	0	0	0	0	0	0	0	0	0	0	0	0	0	0	0	0	0	0	0
chrIV	174256	C	T	10	1	YDL158C	YDL159W	YDL157C	NON_SYNONYMOUS_CODING	0	0	0	0	0	0	0	0	0	0	0	0	0	0	0	0	0.0092	0	0	0	0	0	0	0	0	0	0	0	0	0	0	0	0	0.0057	0	0	0	0	0	0
chrIV	175255	G	A	10	1	YDL157C	YDL159W	YDL156W	NON_SYNONYMOUS_CODING	0	0	0	0	0	0	0	0	0	0	0	0	0	0	0.0098	0	0	0	0	0	0	0	0	0	0	0	0	0	0	0	0	0	0	0	0	0	0	0	0	0
chrIV	176759	C	A	10	1	YDL155W	YDL156W	NONE	NONE	0	0	0	0	0	0	0.0135	0	0	10	0	0	0	0	0	0	0	0.008	0	0.0078	0	0	0	0	0	0	0	0	0	0	0	0	0	0	0	0	0	0	0	0
chrIV	177956	G	T	0.9931	1	YDL154W	YDL156W	YDL155W	NON_SYNONYMOUS_CODING	0	0	0	0	0	0	0	0	0	0	0	0.0071	0	0	0	0.0043	0	0	0	0	0	0	0.0063	0	0	0	0	0	0.9931	0	0	0	0	0	0	0	0	0	0	0
chrIV	182366	A	C	0.9945	1	YDL152W	YDL151C	YDL153C	SYNONYMOUS_CODING	0	0	0	0	0	0	0	0	0	0	0	0	0	0	0	0	0	0	0	0	0	0	0	0	0	0	0	0	0	0	0	0	0	0	0	0	0	0	0	0
chrIV	182982	T	A	10	1	YDL150W	YDL151C	YDL153C	NON_SYNONYMOUS_CODING	0	0	0	0	0	0	0	0	0	0	0	0	0	0	0	0	0	0	0	0	0	0	0	0	0	0	0	0	0	0	0	0	10	0	0	0	0	0	0	0
chrIV	184651	C	G	10	1	YDL149W	YDL150W	NONE	NONE	0	0	0	0.0078	0	0	0	0	0	0	0	0	0	0	10	0	0	0	0	0	0	0	0	0	0	0	0	0	0	0	0	0	0	0	0	0	0	0	0	0
chrIV	185108	A	G	10	1	YDL151C	YDL150W	YDL149W	SYNONYMOUS_CODING	0.0044	0	0	0	0.0059	10	0	0	0	0	0	0	0	0	0	0	0	0	0	0	0	0	0	0	0	0	0	0	0	0	0	0	0	0	0	0	0	0	0	0
chrIV	191717	G	T	10	1	YDL146W	YDL145C	YDL147W	NON_SYNONYMOUS_CODING	0	0	0	10	0	0	0	0	0	0	0	0	0	0	0	0	0	0	0	0	0	0	0	0	0.0062	0.0076	0	0	0	0	0	0	0	0	0	0	0	0	0	0
chrIV	193139	G	T	10	1	YDL148C	YDL147W	YDL146W	NON_SYNONYMOUS_CODING	0	0	0	0	0	0	0	0	0	0	0	0	0	0	0	0	0	0	0	0	0	0.007	0	0	0	0	0	0	0	0	0	0.0114	0	0	0	0	0	0	0	0
chrIV	208021	T	C	10	1	NONE	YDL141W	YDL140C	NON_SYNONYMOUS_CODING	0	0	0	0	0	0	0	0	0.0055	0	0	0	0	0	0	0	0	0	0	0	0	0	0	0	0	0	0	0	0	0	0	0	0	0	0	0	0	0	0	0
chrIV	216591	T	A	10	1	YDL136W	YDL138W	YDL137W	SYNONYMOUS_CODING	0	10	0	0	0	0	0	0	0	0	0	0	0	0	0	0	0	0	0	0	0	0	0	0	0	0	0	0	0	0	0.0275	0	0	0	0	0	0	0	0	0
chrIV	219847	C	A	10	1	YDL135C	YDL136W	YDL134C	NON_SYNONYMOUS_CODING	0	0.0121	0	0	0	10	0	0	0	0	0	0	0	0	0	0	0	0	0	0	0	0	0	0	0	0	0	0	0	0	0	0	0	0	0	0	0	0	0	0
chrIV	219851	G	T	10	1	YDL135C	YDL136W	YDL134C	SYNONYMOUS_CODING	0	0	0	0	0	10	0	0	0	0	0.0053	0	0	0	0	0	0	0	0	0	0.0079	0	0	0	0	0	0	0	0	0	0	0.0056	0.0052	0	0	0	0	0	0	0.0066
chrIV	225889	C	G	0.9946	1	YDL131W	YDL133W	YDL132W	NON_SYNONYMOUS_CODING	0	0	0	0	0	0	0.0055	0	0.9946	0	0	0	0	0	0	0	0	0	0	0	0	0	0	0	0	0	0	0	0	0	0	0	0	0	0	0	0	0	0	0
chrIV	225932	A	T	10	1	YDL131W	YDL133W	YDL132W	NON_SYNONYMOUS_CODING	0	0	0	0	0	0	0	0	0	0	0	0	0	0	0	0	0	0	0	0	0	0	0	0	0	0	0	0	0	0	0.0049	0	0	0.0044	0	0	0	10	0	0
chrIV	234877	T	A	10	1	YDL127W	YDL128W	NONE	NONE	0	0	0	0	0	0	0	0	0	0	0	0	0	0	0	0	0	10	0	0	0	0	0	0	0	0	0	0	0	0	0	0	0	0	0	0	0	0	0	0
chrIV	235938	G	A	10	1	YDL124W	YDL127W	NONE	NONE	0	0	0	0	0	0	0	0	0	0	0	0	0	0	0	0	0	0	0	0	0	0	0	0	0	0	0	0	0	0	0	0	0	0	0	0	0	0	0	0
chrIV	240357	A	T	0.9942	1	YDL125C	YDL127W	YDL124W	NON_SYNONYMOUS_CODING	0	0	0	0.9942	0	0	0	0	0	0	0	0	0	0	0	0	0	0	0	0	0	0	0	0	0	0	0	0	0	0	0	0	0	0	0	0	0	0	0	0
chrIV	240475	G	C	10	1	YDL125C	YDL127W	YDL124W	NON_SYNONYMOUS_CODING	0	0	0	0	0	0	0	0	0	0	0	0	0	0	0	0	0	0	0	0	0	0	0	0	0	0	0	0	0	0	0	0	0	0	0	0	0	0	0	0
chrIV	240652	G	T	10	2	YDL123W	YDL121C	YDL124W	NON_SYNONYMOUS_CODING	0	0	0	0	0	0	0	0	0	0	0	0	0	0	0	0	0	0	0	0	0	0	0	0.0056	0	0	0	0	0	0	0	0	0	0	0	0	0	0	0	0
chrIV	240739	G	C	10	1	YDL123W	YDL121C	YDL124W	NON_SYNONYMOUS_CODING	0	0	0	0	0	0	0	0	0	0	0	0	0	0	0	0	0	0	0	0	0	0	0	0	0	0	0	0	0	0	0	0	0	0	0	0	0	0	0	0
chrIV	244867	G	T	10	1	YDL120W	YDL121C	YDL122W	NON_SYNONYMOUS_CODING	0	0	0	0	0.0059	0	0	0	0	0	0	0	0	0	0	0	0	0	0	0	0	0	0	0	0	0	0.0057	0	0	0	0	0	0	0	0	0	0	0	0	0
chrIV	261995	C	T	10	1	YDL113C	YDL111C	YDL112W	SYNONYMOUS_CODING	0	0	0	0	0	0	0	0	0	0	0	0	0	0	0	0	0	0	0	0	0	0	0	0	0	0	0	0	0	0	0	0	0	0	0	0	0	0	0	0
chrIV	270248	G	A	10	1	YDL105W	YDL107W	YDL106C	SYNONYMOUS_CODING	0	0	0	0	0	0	0	0	0	0	0	0	0	0	0	0	0	0	0	0	0	0	0	0	0	0	0	0	0	0	0	0	0	0	0	0	0	0	0	0
chrIV	274253	C	A	10	1	YDL106C	YDL105W	YDL104C	NON_SYNONYMOUS_CODING	0	0	0	0	0.0058	0	0	0	0	0	0	0	0	0	0	0	0.0071	0	0	0.0075	0	0	0	0	0	0	0	0	0	0	0	0.0143	0.0069	0	0	0	0	0.0067	0	0
chrIV	279736	C	G	10	1	YDL103C	YDL101C	YDL102W	SYNONYMOUS_CODING	0	0	0	0	0	0	0	0	0	0	0	0	0	0	0	0	0	0	0	0	0	0	0	0	0	0	0	0	0	0	0	0	0	0	0	0	0	0	0	0
chrIV	280644	A	T	10	1	YDL099W	YDL102W	YDL101C	NON_SYNONYMOUS_CODING	0	10	0	0	0	0	0	0	0	0	0	0	0	0	0	0	0	0	0	0	0	0	0	0	0	0	0	0	0	0	0.0667	0	0	0	0	0	0	0	0	0
chrIV	281308	T	A	10	1	YDL099W	YDL100C	YDL101C	NON_SYNONYMOUS_CODING	0	0	0	0	0	0	0	0	0	0	0	0	0	0	0	0	0	0	0	0	0	0	0	0	0	0	0	0	0	0	0	0	0	0	0	0	0	0	0.0076	0
chrIV	281586	T	C	0.9833	1	YDL099W	YDL100C	YDL101C	NON_SYNONYMOUS_CODING	0	0	0	0	0	0	0	0	0	0	0	0	0	0	0	0	0	0	0.9833	0	0	0	0	0	0	0	0	0	0	0	0	0	0	0	0	0	0	0	0	0
chrIV	283416	A	G	0.9944	1	YDL099W	YDL098C	NONE	NONE	0	0	0	0	0	0	0	0.9944	0.0043	0	0	0	0	0	0	0	0	0	0	0	0	0	0	0	0	0	0	0	0	0	0	0	0	0	0	0	0	0	0	0
chrIV	284726	G	A	10	1	YDL100C	YDL099W	YDL098C	NON_SYNONYMOUS_CODING	0	0	0	0	0	0	0	0	0	0	0	0	0	0	0	0	0	0	0	0	0	0	0	0	0	0	0	0	0	0	0	0	0	0	0	0	0	0	0	0
chrIV	290067	G	A	0.9925	1	YDL092W	YDL095W	YDL094C	SYNONYMOUS_CODING	0	0.9925	0	0	0	0	0	0	0	0	0.0056	0	0	0	0	0	0	0	0	0	0	0	0	0	0	0	0	0	0	0	0.0406	0	0	0	0	0	0	0	0	0
chrIV	318117	G	T	10	1	YDL078C	YDL076C	YDL077C	SYNONYMOUS_CODING	0	0	0	0	0	0	0.0076	0	0	0	0	0	0	0	0	0	0	0	0	0	0	0	0	0	0	0	0	0	0	0	0	0	0	0	0	0	0.0055	0	0	0
chrIV	323126	G	C	10	1	YDL076C	snR63	NONE	NONE	0	0	0	0	0	0	0	0	0	0	0	0	10	0.0175	0	0	0	0	0	0	0	0	0	0	0	0	0	0	0	0	0	0	0	0	0	0	0	0	0	0
chrIV	332301	A	G	10	1	YDL068W	YDL069C	YDL070W	NON_SYNONYMOUS_CODING	0	0	0	0.0045	0	0	0	0	0	0	0	0	0	0	0	0	0	0	0	0	0	0	0	0	0	0	0	0	0	0	0	0	0	0	0	0	0	0	0	0
chrIV	336092	C	A	0.9921	1	YDL064W	YDL065C	YDL066W	NON_SYNONYMOUS_CODING	0	0	0	0	0	0	0.9921	0	0	0	0	0	0	0	0.0052	0	0	0	0	0	0	0	0	0	0	0	0	0	0	0	0	0	0	0	0	0	0	0	0	0
chrIV	337042	A	T	0.5811	0	YDL064W	YDL066W	YDL065C	NON_SYNONYMOUS_CODING	0	0	0	0	0	0	0	0	0	0	0	0	0	0	0	0	0.5811	0	0	0	0	0	0	0	0	0	0	0	0	0	0	0	0	0	0	0	0	0	0	0
chrIV	340139	T	C	0.8472	1	YDL063C	YDL061C	YDL062W	NON_SYNONYMOUS_CODING	0	0	0	0	0	0	0	0	0	0	0	0	0	0	0	0	0	0	0.8472	0	0	0	0	0	0	0	0	0	0	0	0	0	0	0	0	0	0	0	0	0
chrIV	350187	A	G	0.5802	0	YDL057W	NONE	YDL058W	NON_SYNONYMOUS_CODING	0	0	0	0	0	0	0	0.0056	0	0	0	0	0	0	0	0	0	0	0	0	0	0	0	0	0	0	0	0	0	0	0	0	0	0	0	0	0	0	0.0055	0
chrIV	352124	A	T	10	1	YDL056W	YDL058W	YDL057W	NON_SYNONYMOUS_CODING	0	0	0	0	0	0	0	0	0	0	0	0	0	0	0	0	0	0	0	0	0	0	0	0	0	0	10	0	0	0	0	0	0	0	0	0	0	0	0	0
chrIV	352426	A	G	10	1	YDL056W	YDL057W	NONE	NONE	0	0	0	0	0	0	0	0	0	0	0	0	0	0	0	0	0	0	0	0	0	0	0	0	0	0	0	0	0	0	0	0	0	0	0	0	0	0.0078	0	10
chrIV	354738	T	C	10	1	tK(UUU)D	YDL055C	YDL056W	NON_SYNONYMOUS_CODING	0	0	0	0	0	0	0	0	0	0	0	0	0	0	0	0	0	0	0	0	0	0	0.0055	0	0	0	0	0	0	0	0	0	0	0	0	0	0	0	0	0
chrIV	356948	C	G	0.9975	1	YDL055C	YDL056W	NONE	NONE	0	0	0	0	0	0	0	0	0	0	0	0	0	0	0	0	0	0	0	0	0	0	0	0	0	0	0.0058	0	0	0	0	0	0	0	0	0	0	0	0	0
chrIV	357393	A	T	10	1	YDL055C	YDL056W	NONE	NONE	0	0	0	0	0	0	0	0	0	0	0	0	0	0	0	0	0	0	0	0	0	0	0	0	0	0	0	0	0	0	0	0	0	0	0	0	0	0	0	0
chrIV	359618	C	T	10	1	YDL055C	YDL054C	tK(UUU)D	INTRON	0	0	0	0	0	0	0	0	0	0	0	0	0	0	0	0	0	0	0	0	0	0	0	0	0	0	0	0	0	0	0	0	0	0	0	0	0	0	0	0
chrIV	362287	G	C	10	1	YDL053C	YDL052C	NONE	NONE	0	0	0	0	0	0	0	0	0	0	0	0	0	0	0	0	0	0	0	0	0	0	0	0	0	0	0	0	0	0	0	0	0	0	0.0066	0	0	0	0	0
chrIV	364400	T	C	0.9947	1	YDL052C	YDL050C	YDL051W	NON_SYNONYMOUS_CODING	0	0	0	0	0	0	0	0	0	0	0	0	0	0	0	0	0	0	0	0	0	0	0	0	0	0	0	0	0	0	0	0	0	0	0	0	0	0	0	0
chrIV	364778	G	A	10	1	YDL052C	YDL049C	YDL050C	NON_SYNONYMOUS_CODING	0	0	0	0	0	0	0	0	0	0	0	0	0	0	0	0	0	0	0	0	0	0	0	0	0	0	0	0	0	10	0	0	0	0	0	0	0	0	0	0
chrIV	364944	G	C	10	1	YDL050C	YDL049C	NONE	NONE	0	0	0	0	0	0	0	0	0	0	0	0	0	0	0	0	0	0	0	0	0	0	0	0	0	0	0	0	0	0	0	0	0	0	0	0	0	0	0	0
chrIV	365845	A	T	10	1	YDL050C	YDL048C	YDL049C	NON_SYNONYMOUS_CODING	0	0	0.0062	0	0	0	0	0	0	0	0	10	0	0	0	0	0	0	0	0	0	0	0	0	0	0	0	0	0	0	0	0	0	0	0	0	0	0	0	0
chrIV	366349	C	G	10	1	YDL049C	YDL048C	NONE	NONE	0	0	0	0	0	0	0	0	0	0	10	0	0	0	0	0	0	0	0	0	0	0	0	0	0	0	0	0	0	0	0	0	0	0	0	0	0	0	0	0
chrIV	366370	G	A	10	1	YDL049C	YDL048C	NONE	NONE	0	0	0.0125	0	0	0	0	0	0	0	0	0	0	0	0	0	0	0	0	0	0	0	0	0	0	0	0	0	0	10	0	0	0	0	0	0	0	0	0	0
chrIV	372869	T	C	0.7925	1	YDL048C	YDL045W-A	YDL045C	NON_SYNONYMOUS_CODING	0	0	0	0	0	0	0	0	0	0	0	0	0	0	0	0.009	0	0	0	0	0	0	0	0	0	0	0	0	0	0	0	0	0	0	0	0	0	0	0	0
chrIV	373013	T	C	10	1	YDL048C	YDL045W-A	YDL045C	NON_SYNONYMOUS_CODING	0	0	0	0	0	0	0	0	0	0	0	0	0	0	0	0	0	0	0	0	0	0	0	0	0	0	0	0	0	0	0	0	0	0	0	0	0	0	0	0
chrIV	376355	C	G	0.9651	1	YDL044C	YDL042C	YDL043C	SYNONYMOUS_CODING	0	0	0	0	0.0065	0	0	0	0	0	0	0	0	0	0	0	0	0	0	0	0	0	0	0	0	0	0	0	0	0	0	0	0	0	0	0	0	0	0	0
chrIV	380187	A	T	10	1	YDL042C	YDL041W	YDL040C	NON_SYNONYMOUS_CODING	0	0	0	0	0	0	0	0	0	0	0	0	0	0	0	0	0	0	0	0	0	0	0	0	0	0	0	0	0	10	0	0	0	0	0	0	0	0	0	0
chrIV	386051	G	T	10	1	YDL037C	YDL036C	NONE	NONE	0	0	0	0	0	0	0	0	0	0	0	0	0	0	0	0	0	0	0	0	0	0	0	0	0	0	0	0	0	0	0	0	0	0	0	0	0	0	0	0
chrIV	390981	A	T	0.995	1	YDL034W	YDL033C	YDL035C	NON_SYNONYMOUS_CODING	0	0	0	0	0	0	0	0	0	0	0	0	0	0	0	0	0	0	0	0	0	0	0	0	0	0	0	0	0	0	0	0	0	0	0	0	0	0	0	0
chrIV	396694	T	G	0.9926	1	YDL030W	YDL032W	YDL031W	NON_SYNONYMOUS_CODING	0	0	0	0	0	0	0	0	0	0	0	0	0	0	0	0	0	0	0	0	0	0	0.0081	0	0	0	0	0	0	0	0	0	0	0	0	0	0	0	0	0
chrIV	410402	G	A	0.9861	1	YDL022C-A	YDL023C	tA(AGC)D	EXON	0	0	0.9861	0	0	0	0	0	0	0	0.0133	0	0	0	0	0	0	0	0	0	0	0	0	0	0	0	0	0	0	0	0	0	0	0	0	0	0	0	0	0
chrIV	428055	A	T	10	1	YDL013W	YDL017W	YDL014W	NON_SYNONYMOUS_CODING	0	0	0	0	0	0	0	0	0	0	0	0	0	0	0	0	0	0	0	0	0	0	0	0	0	0	0	0	0	0	0	0	0	0	0	0	0	0	0	0
chrIV	428967	C	G	10	1	YDL013W	YDL014W	NONE	NONE	0	10	0	0	0	0	0	0	0	0	0	0	0	0	0	0	0	0	0	0	0	0	0	0	0	0	0	0	0	0	0	0	0	0	0	0	0	0	0	0
chrIV	431490	T	C	0.9938	1	YDL010W	YDL013W	YDL012C	NON_SYNONYMOUS_CODING	0	0	0.0057	0	0	0	0	0	0	0	0	0	0	0	0	0	0	0.0076	0	0	0	0	0	0	0	0	0	0	0	0	0	0	0	0	0	0	0	0	0	0
chrIV	436007	T	C	10	1	tT(AGU)D	YDL007C-A	NONE	NONE	0	0	0	0	0	0	0	0	0	0	0.0073	0	0	0	0	0	0	0	0	0	0	0	0	0	0	0	0	0	0	0	0	0	0	0	0	0	0	0	0	0
chrIV	443991	C	T	10	1	YDL003W	YDL004W	NONE	NONE	0	0	0	0	0	0	0	0	0	0	0	0	0	0	0	0	0	0	0	10	0	0	0	0	0	0	0	0	0	0	0	0	0	0	0	0	0	0	0	0
chrIV	465740	G	C	10	1	YDR011W	YDR009W	NONE	NONE	0	0	0	0	0	0	0	0	0	0	0	0	0	0	10	0	0	0	0	0	0	0	0	0	0	0	0	0	0	0	0	0	0	0	0	0	0.0054	0	0	0
chrIV	472726	T	C	0.5741	0	YDR013W	YDR011W	YDR012W	SYNONYMOUS_CODING	0	0	0	0	0	0	0	0	0	0.5741	0	0	0	0	0	0	0	0	0	0	0	0	0	0	0	0	0	0	0	0	0	0	0	0.0026	0	0	0	0	0	0
chrIV	476458	A	T	10	1	YDR014W-A	YDR014W	NONE	NONE	0	0	0	0	0	0	0	0	0	0	0	0	0	0	0	0	0	0	0	0	0	0	0	0	0	0	0	0	10	0	0	0	0	0	0	0	0	0	0	0
chrIV	485813	G	C	0.7969	1	YDR019C	YDR022C	YDR020C	SYNONYMOUS_CODING	0	0	0	0	0	0	0	0	0	0	0	0	0	0	0	0	0	0	0	0	0	0	0	0	0	0	0	0	0	0	0	0	0	0	0.0143	0	0	0	0	0
chrIV	495748	T	C	0.6903	0	YDR026C	YDR028C	YDR027C	SYNONYMOUS_CODING	0	0	0	0	0	0	0	0	0	0	0	0	0	0	0	0	0	0	0	0	0	0	0	0	0	0	0	0	0	0	0	0	0	0	0	0	0	0	0	0
chrIV	499416	C	A	0.9936	1	YDR029W	YDR030C	YDR028C	NON_SYNONYMOUS_CODING	0	0	0	0	0	0	0.006	0	0	0	0	0	0	0	0	0	0	0	0	0	0	0	0	0	0	0	0.0047	0	0	0	0	0	0	0	0	0	0	0	0	0
chrIV	500762	T	C	10	1	YDR029W	YDR030C	YDR028C	NON_SYNONYMOUS_CODING	0	0	0	0	0	0	0	0	0	0	0	0	0	0	0	0	0	0	0	0	0	0	0	0	0	0	0	0	0	0	0	0	0	0	0	0	0	0	0	0
chrIV	502522	G	T	0.993	1	YDR031W	YDR029W	YDR030C	NON_SYNONYMOUS_CODING	0	0	0	0	0	0	0	0	0	0	0	0	0	0	0	0	0	0	0	0	0	0	0	0	0	0	0	0	0	0	0	0	0	0	0.993	0	0	0	0	0
chrIV	519794	G	A	0.9574	1	YDR034C-C	YDR034C-A	tL(UAA)D	EXON	0	0	0	0	0	0	0	0	0	0	0	0	0	0	0	0	0	0	0	0	0	0	0	0	0	0	0	0	0	0	0	0	0	0	0	0	0	0	0	0
chrIV	525178	T	C	0.992	1	YDR037W	YDR038C	NONE	NONE	0	0	0	0	0	0	0	0	0	0	0	0	0	0	0	0	0.992	0	0	0	0	0	0	0	0	0	0	0	0	0	0	0	0	0	0	0	0	0	0	0
chrIV	541813	C	G	10	1	snR47	YDR043C	NONE	NONE	0	0	0	0	0	0	0	0	0	0	0	0	10	0.0381	0	0	0	0	0	0	0	0	0	0	0	0	0	0	0	0	0	0	0	0	0	0	0	0	0	0
chrIV	561196	T	C	10	1	YDR052C	YDR054C	NONE	NONE	0	0	0	0	0	0	0	0	0	0	0	0	0	0	0	0	0	0	0.0062	0	0	0	0	0	0	0	0	0	0	0	0	0	0	0	0	0	0	0	0	0
chrIV	561216	T	A	10	1	YDR052C	YDR054C	NONE	NONE	0	0	0	0	0	0	0	0	0	10	0	0	0	0	0	0	0	0	0	0	0	0	0	0	0	0	0	0	0	0	0	0	0	0	0	0	0	0	0	0
chrIV	561685	G	A	10	1	YDR052C	YDR053W	YDR054C	SYNONYMOUS_CODING	0	0	0	0	0	0	0	0	0	10	0	0	0	0	0	0	0	0	0	0	0	0	0	0	0	0	0	0	0	0	0	0	0	0	0	0	0	0	0	0
chrIV	563224	A	G	10	1	YDR055W	YDR056C	NONE	NONE	0	0	0	0	0	0	0	0	0	0	0	0	0	0	0	0	0	0	0	0	0	0	0	0	0	0	0	0	0	0	0	0	0	0	0	0	0	0	0	0
chrIV	563471	C	T	10	1	YDR055W	YDR056C	NONE	NONE	0	0	0	0	0	0	0	0	0	0	0	0	0	0	0	0	0	0	0	0	0	0	0	0	0	0	0	0	0	0	0	0	0	0	0	0	0	0	0.0071	0
chrIV	563819	C	T	0.9409	1	YDR054C	YDR056C	YDR055W	SYNONYMOUS_CODING	0	0	0	0	0	0	0	0	0	0	0	0	0	0	0	0	0	0.006	0	0	0	0	0	0	0	0	0	0	0	0	0.9409	0	0	0	0	0	0	0	0	0
chrIV	565335	A	G	0.9938	1	YDR057W	YDR055W	YDR056C	NON_SYNONYMOUS_CODING	0	0	0	0	0	0	0	0	0	0	0	0	0	0	0	0	0	0	0	0	0	0	0	0	0	0	0	0	0	0	0	0	0	0	0	0	0	0	0	0
chrIV	568885	G	T	10	1	tD(GUC)D	YDR059C	tR(UCU)D	EXON	0	0	0	0	0	0	0	0	0	0	0	0	0	0	0	0	0	0	0	0	0	0	0	0	0	0	0	0	0	0	0	0	0	0	0	0	0	0	0	0
chrIV	576783	A	T	0.5643	0	YDR063W	YDR061W	YDR062W	SYNONYMOUS_CODING	0	0	0	0	0	0	0	0	0	0	0	0	0	0	0	0	0	0	0	0	0	0	0	0	0	0	0	0	0	0	0	0	0	0	0	0	0	0	0	0
chrIV	583171	G	T	10	1	YDR068W	YDR065W	YDR067C	STOP_GAINED	0	0	0	0	0	0	0	0	0	0	0	0	0	0	0	0	0	0	0	0	0	0	0	0	0	0	0	0.0045	0	0	0	0	0	0	0	0	0	0	10	0
chrIV	590308	C	T	10	2	YDR071C	NONE	YDR072C	NON_SYNONYMOUS_CODING	0	0	0	0	0	0	0	0	0	0	0	0	0	0	0	0	0.0062	0	0	0	0	0	0	0	0	0	0	0	0	0	0	0	0	0	0	0	0	0	0	0
chrIV	591305	G	T	10	1	YDR073W	NONE	YDR072C	NON_SYNONYMOUS_CODING	0.0039	0	0	0	0	0	0	0	0	0	0	10	0	0	0	0	0	0	0	0	0	0	0	0	0	0	0	0	0	0	0	0	0	0	0	0.0043	0	0	0	0
chrIV	595978	A	T	10	1	YDR075W	YDR073W	YDR074W	NON_SYNONYMOUS_CODING	0	0	0	0	0	0	0	0	0	0	0	0	0	0	0	0	0	0	0	0	0	0	0	0	0	0	0	0	0	0	0	0	0	0	0	0	0	0	0	0
chrIV	612329	C	G	10	1	YDR081C	YDR082W	YDR083W	NON_SYNONYMOUS_CODING	0	0	0	0	0	0	0	0	0	0	0	0	0	0	0	0	0	0	0	0	0	0	0	0	0	0	0	0	0	0	0	0	0	0	0	0	0	0	0	0
chrIV	615651	T	C	10	1	YDR084C	YDR086C	YDR085C	SYNONYMOUS_CODING	0	0	0	0	0	0	0	0	0	0	0	0	0	0	0	0	0	0	0	0.0071	10	0	0	0	0	0	0	0	0	0	0	0	0	0	0	0	0	0	0	0
chrIV	615766	G	C	10	1	YDR084C	YDR086C	YDR085C	NON_SYNONYMOUS_CODING	0	10	0	0	0	0	0	0	0	0	0	0	0	0	0	0	0	0	0	0	0	0	0	0	0	0	0	0	0	0	0	0	0	0	0	0	0	0	0	0
chrIV	616692	C	A	10	1	YDR085C	YDR086C	NONE	NONE	0	10	0	0	0	0	0	0	0	0	0	0	0	0	0	0	0	0	0.0067	0	0	0	0	0	0	0.0069	0.0106	0	0.0072	0	0	0	0	0	0	0.0046	0	0	0	0
chrIV	626079	C	G	10	1	YDR090C	YDR091C	NONE	NONE	0	0	0	0	0	0	0	0	0	0	0	0	0	0	0	0	0	0	0	0	0	0	0	0	0	0	0	0	0	0	0	0	0	0	0	10	0	0	0	0
chrIV	629238	T	G	10	1	YDR092W	YDR089W	NONE	NONE	0	0	0	0	0	0	0	0	0	0	0	0	0	0	0	0	0	0	0	0	0	0	0	0	0	0	0	0	0	0	0	0	0	0	0	0	0	0	0	0
chrIV	633574	A	G	10	1	YDR094W	YDR095C	YDR093W	SYNONYMOUS_CODING	0	0	0	0	0	0	0	0	0	0	0	0	0	0	0	0	0	10	0	0	0	0	0	0	0	0	0	0.0056	0	0	0	0	0	0	0	0	0	0	0	0
chrIV	635533	A	G	10	1	YDR094W	YDR095C	YDR093W	SYNONYMOUS_CODING	0	0	0	0	0	0	0	0	0	0	0	0	0	0	0	0	0	0	0	0	0	0	0	0	0	0	0	0	0	0	0	0	0	0	0	0	0	0	0	0
chrIV	645240	T	C	10	1	tQ(UUG)D2	YDR098C-B	NONE	NONE	0	0	0	0	0	0.006	0	0	0	0	0	0	0	0	0	0	0	0	0	0	0	0	0	0	0	0	0	0	0	0	0	0	0	0	0	0	10	0	0	0
chrIV	653708	G	A	0.9799	1	YDR100W	YDR101C	YDR099W	NON_SYNONYMOUS_CODING	0	0	0	0	0	0	0	0	0	0	0	0	0	0.9799	0	0	0	0	0	0	0	0	0	0	0	0	0	0	0	0	0	0	0	0	0	0	0	0	0	0
chrIV	654131	C	G	0.9938	1	YDR100W	YDR101C	YDR099W	NON_SYNONYMOUS_CODING	0	0	0	0	0	0	0	0	0	0	0	0	0	0	0	0	0	0	0	0	0	0	0	0	0	0	0	0	0	0	0	0	0	0	0	0	0	0.9938	0.0078	0
chrIV	655298	G	T	0.9408	1	YDR103W	YDR101C	YDR100W	SYNONYMOUS_CODING	0	0	0	0	0	0	0	0	0.0054	0	0	0	0	0.9408	0	0	0.0073	0	0	0	0	0	0	0	0	0	0	0	0	0	0	0	0	0	0	0	0	0	0	0
chrIV	658844	C	T	0.967	1	YDR102C	YDR104C	YDR103W	NON_SYNONYMOUS_CODING	0	0	0	0	0	0	0	0	0	0	0	0	0	0	0	0	0	0	0	0	0	0	0	0	0	0	0	0	0	0	0	0	0	0	0	0	0	0	0	0
chrIV	664435	T	A	10	1	YDR106W	YDR105C	YDR104C	NON_SYNONYMOUS_CODING	0	0	0	0	0	0	0	0	0	0	0	0	0	0	0	0	0	0	0	0	0	0	0	0	0	0	0	0	0	0	0	0	0	0	0	0	0	0	0	0
chrIV	666182	A	G	10	1	YDR106W	tI(AAU)D	YDR105C	NON_SYNONYMOUS_CODING	0	0	0	0	0	0	0	0	0	0	0	0	0	0	0	0	0	0	0	0	0	0	0	0	0	0	0	0	0	0	0	0	0	0	0	0	0	0	10	0
chrIV	668016	G	T	10	1	YDR105C	YDR106W	tI(AAU)D	EXON	0	0	10	0	0	0	0	0	0	0	0	0	0	0	0	0	0	0.0161	0	0	0.0099	0	0	0	0	0	0	0	0	0	0	0	0	0.0057	0	0	0	0	0	0
chrIV	671790	A	T	0.9942	1	YDR107C	YDR109C	YDR108W	NON_SYNONYMOUS_CODING	0	0	0	0	0	0	0	0	0	0	0	0	0	0	0	0	0	0	0	0	0	0	0	0	0	0	0	0	0	0	0	0	0	0	0	0	0	0	0.9942	0
chrIV	674224	C	G	10	1	YDR110W	YDR108W	YDR109C	NON_SYNONYMOUS_CODING	0	0	0	0	0	0	0	0	0	0	0	0	0	0	0	0	0	0	0	0	0	0	0	0	0	0	0	0	0	0	0	0	0	0	0	0	0	0	0	0
chrIV	674427	G	C	10	1	YDR110W	YDR108W	YDR109C	NON_SYNONYMOUS_CODING	0	0	0	0	0	0	0	0	0	0	0	0	0	0	0	0	0	0	0	0	0	0	0	0	0	0	0	0	0	0	0	0	0	0	0	0	0	0	0	0
chrIV	680991	T	C	10	1	YDR115W	YDR114C	YDR113C	NON_SYNONYMOUS_CODING	0	0	0	0	0	0	0	0	0	0	0	0	0	0	0	0	0	0	0	0	0	0	0	0	0	0	0	0	0	0	0	0	0	0	0	0	0	0	0	0
chrIV	684365	T	C	0.9943	1	YDR116C	YDR115W	YDR117C	NON_SYNONYMOUS_CODING	0	0	0	0	0	0	0	0	0	0	0	0	0	0	0	0	0	0	0	0	0	0	0	0	0	0	0	0	0	0	0	0	0	0	0	0	0	0	0	0
chrIV	686438	G	A	10	1	YDR117C	YDR115W	YDR118W	NON_SYNONYMOUS_CODING	0	0	0	0	0	0	0	0	0	0	0	0	0	0	0.0042	0	0	0	0	0	0	0	0	0	0	0	0	0	0	0	0	0	0	0	0	0	0	0	0	0
chrIV	687121	A	G	10	1	YDR118W-A	YDR120C	YDR118W	SYNONYMOUS_CODING	0	0	0	0	0	0	0	0	0	0	0	0	0	0	0	0	0	0	0	0	0	0	0	0	0	0	0	0	0	0	0	0	0	0	0	0	0	0	0	0
chrIV	688138	G	A	10	1	YDR119W	YDR118W-A	NONE	NONE	0	0	0	0	0	0	0	0	0	0	0	0	0	0	0	0	0	0	0	0	0	0	0	10	0	0	0	0	0	0	0	0	0	0	0	0	0	0	0	0
chrIV	690991	T	G	0.993	1	YDR119W-A	YDR119W	NONE	NONE	0	0	0	0	0	0	0	0	0	0	0	0	0	0	0	0	0	0	0	0	0	0	0	0	0	0	0	0	0	0	0	0	0	0	0	0	0	0	0	0
chrIV	693844	A	G	10	1	YDR120C	YDR119W-A	YDR121W	NON_SYNONYMOUS_CODING	0	0	0	0	0	0	0	0	0	0	0	0	0	0	0	0	0	0	0	0	0	0	0	0	0	0	0	0	0	0	0	0	0	0	0	0	0	0	0	0
chrIV	698505	A	G	10	1	YDR124W	YDR123C	NONE	NONE	0	0	0	0	0	0	0	0	0	0	0	0	0	0	0	0	0	0	0	0	0	0	0	0	0	0	0	10	0	0	0	0	0	0	0	0	0	0	0	0
chrIV	711095	A	G	10	1	NONE	YDR127W	YDR128W	NON_SYNONYMOUS_CODING	0	0	0	0	0	0	0	0	0	0	0	0	0	0	0	0	0	0	0	0	0	0	0	0	0	0	0	0	0	0	0	0	0	0	0	0	0	10	0	0
chrIV	736349	A	T	10	1	YDR139C	YDR140W	YDR141C	NON_SYNONYMOUS_CODING	0	0	0	0	0	0	0	0	0	0	0	0	0	0	0	0	0	0	0	0	0	0	0	0	0	0	0	0	0	0	0	0	0	0	0	0	0	0	0	0
chrIV	740664	C	T	10	1	YDR141C	YDR143C	YDR142C	NON_SYNONYMOUS_CODING	0	0	0	0	0	0	0	0	0	0	0	0	0	0	0	0	0	0	0	0	0	0	0	0	0	0	0	0	0	0	0	0	0	0	0	0	0	0	0	0
chrIV	741642	A	G	10	1	YDR142C	YDR143C	NONE	NONE	0	0	0	0	0	0	0	0	0	0	0	0	0	0	0	0	0	0	0	0	0	0	0	0	0	0	0	0	0	0	0.0057	0	0	0	0	0	0	0	0	0
chrIV	746332	G	A	10	8	YDR144C	YDR146C	NONE	NONE	0	0	0	0	0	0	0	0	0	0	0	0	0	0	0	0	0	0	0	0	0	0	0	0.0098	10	10	10	10	10	10	0.9859	10	0.0085	0	0	0	0	0	0	0
chrIV	795708	A	T	10	1	YDR169C-A	YDR170C	NONE	NONE	0	0	0	0	0	0	0	0	0	0	0	0	0	0	0	0	0	0	0	0	0	0	0	0	0	0	0	0	0	0	0	0	0	0	0	0	0	0	0	0
chrIV	796144	T	C	0.4364	0	YDR169C-A	YDR170C	NONE	NONE	0	0	0	0	0	0	0	0	0	0	0	0	0	0	0	0	0	0	0	0	0.4364	0	0	0	0	0	0	0	0	0	0	0	0	0	0	0	0	0	0	0
chrIV	798434	A	T	10	1	YDR169C-A	tQ(UUG)D3	YDR170C	NON_SYNONYMOUS_CODING	0	0	0	0	0	0	0	0	0	0	0	0	0	0	0	0	0	0	0	0	0	0	0	0	0	0	0	0	0	0	0	0	0	0	0	0	0	0	0	0
chrIV	802174	T	C	10	1	YDR170W-A	tQ(UUG)D3	YDR170C	NON_SYNONYMOUS_CODING	0	0	0.0024	0	0	0	0	0	0	0	0	10	0	0	0	0	0	0	0	0	0	0	0	0	0	0	0	0	0	0	0	0	0	0	0	0	0	0	0	0
chrIV	802776	G	C	0.9815	1	YDR170W-A	NONE	tQ(UUG)D3	EXON	0	0	0	0	0	0	0	0	0	0	0	0	0	0	0	0	0	0	0	0	0	0	0	0	0	0	0	0	0	0	0	0	0	0	0	0	0	0	0	0
chrIV	810999	A	G	10	1	YDR174W	YDR172W	YDR173C	NON_SYNONYMOUS_CODING	0	0	0	0	0	0.0045	10	0	0	0	0	0	0	0	0	0	0	0	0	0	0	0	0	0	0	0	0	0	0	0	0	0	0	0	0	0	0	0	0	0
chrIV	811758	C	G	0.9935	1	YDR173C	YDR172W	NONE	NONE	0	0	0	0	0	0	0	0	0	0	0	0	0	0	0	0	0	0	0	0	0	0	0	0	0	0	0	0	0	0	0	0	0	0	0	0	0	0	0	0
chrIV	824512	T	A	0.9917	1	YDR182W	YDR181C	YDR180W	NON_SYNONYMOUS_CODING	0	0	0	0	0	0	0	0	0	0	0	0	0	0	0	0	0	0	0	0	0	0	0	0	0	0	0	0	0	0.9917	0	0	0	0	0	0	0	0	0	0
chrIV	825937	A	G	0.9457	1	YDR182W	YDR180W	YDR181C	SYNONYMOUS_CODING	0	0	0	0	0	0	0.0061	0	0	0	0	0	0	0.9457	0	0	0	0	0	0	0	0	0	0	0	0	0	0	0	0	0	0	0	0	0	0	0	0	0	0
chrIV	833026	T	C	10	1	YDR185C	YDR183W	YDR186C	NON_SYNONYMOUS_CODING	0	0	0	0	0	0	0	0	0	0	0	0	10	0.0262	0	0	0	0	0	0	0	0	0	0	0	0	0	0	0	0	0	0	0	0	0	0	0	0	0	0
chrIV	833800	G	T	10	1	YDR185C	YDR187C	YDR186C	NON_SYNONYMOUS_CODING	0	0	0	0	0	0	0	0	0	0	0	0	0	0	0	0	0	0	0	0	0	0	0	10	0	0	0	0	0	0	0	0	0	0	0	0	0	0	0	0
chrIV	836452	T	A	10	1	YDR186C	YDR190C	YDR188W	NON_SYNONYMOUS_CODING	0	0	0	0	0	0	0	0	0	0	0	0.0083	10	0.0276	0	0	0	0	0	0	0	0	0	0	0	0	0	0	0	0	0	0	0	0	0	0	0	0	0	0
chrIV	844633	G	A	0.9932	1	YDR190C	YDR191W	YDR192C	NON_SYNONYMOUS_CODING	0	0	0	0	0	0	0	0	0	0	0	0	0	0	0	0	0	0	0	0.0084	0	0	0	0	0.9932	0	0	0	0	0	0	0	0	0	0	0	0	0	0	0
chrIV	860942	G	T	10	1	YDR206W	YDR204W	YDR205W	NON_SYNONYMOUS_CODING	0.0046	0.007	0	10	0	0	0	0	0	0	0	0	0	0	0	0	0	0	0	0	0	0	0	0	0	0	0	0	0	0	0	0	0	0	0	0	0	0	0	0
chrIV	866741	G	T	10	1	YDR208W	YDR206W	YDR207C	SYNONYMOUS_CODING	0	0	0	0	0	0	0	0	0	0	0	0	0	0	0	0	0	0	0	0	0	0	0	0	0	0	0	0	0	0	0	0	0	0	0	0	0	0	0	0
chrIV	884431	C	A	10	1	YDR211W	NONE	tI(UAU)D	INTRON	0	0	0	0	0	0	0	0	0	0	0	0	10	0	0	0	0	0	0	0	0	0	0	0	0	0	0	0	0	0	0	0	0	0	0	0	0	0	0	0
chrIV	887269	T	C	10	1	YDR213W	YDR211W	YDR212W	NON_SYNONYMOUS_CODING	0	0	0	0	0	0	0	0	0	0	0	0	0	0	0	0	0	0	0	0	0	0	0	0	0	0	0	0	0	0	0	0	0	0	0	0	0	0	0	0
chrIV	890318	T	G	10	1	YDR214W	YDR212W	YDR213W	NON_SYNONYMOUS_CODING	0	0	0	0	0	0	0	0	0	0	0	0	0	0	0	0	0	0	0	0	0	0	0	0	0	0	0	10	0	0	0	0.6845	0	0	0	0	0	0	0	0
chrIV	907488	C	G	10	1	YDR220C	NONE	YDR221W	NON_SYNONYMOUS_CODING	0	0	0	0	0	0	0	0	0	0	0	0	0	0	0	0	0	0	0	0	0	0	0	0	0	0	0	0	0	0	0	0	0.0072	0	0	0	0	0	0	10
chrIV	909880	A	G	10	1	YDR222W	YDR221W	NONE	NONE	0	0	0	0	0	0	0	0	0	0	0	0	0	0	0	0	0	0	0	0	0	0	0	0	0	0	0	0	0	0	0	0	0	0	0	0	0	0	0	0
chrIV	912309	C	T	10	1	YDR225W	YDR222W	YDR223W	STOP_GAINED	0	0	0	0	0	0	0	0	0	0	0	0	0	0	0	0	0	0	0	0	0	0	0	0	0	0	0	0	0	0	0	0	0	0	0	0	0	0	0	0
chrIV	914627	G	C	10	1	YDR225W	YDR223W	YDR224C	NON_SYNONYMOUS_CODING	0	0	0	0	0	0	0	0	0	0	0	10	0	0	0	0.0084	0	0	0	0	0	0	0	0	0	0	0	0	0	0	0	0	0	0	0	0	0	0	0	0
chrIV	917976	G	T	10	1	YDR224C	YDR226W	YDR227W	STOP_GAINED	0	0	0	0	0	0	0	0	0.0047	0	0	10	0	0	0	0	0	0.0066	0	0	0	0	0	0	0	0	0	0	0	0	0	0	0	0	0	0	0	0	0	0
chrIV	923496	G	T	0.9859	1	YDR229W	YDR227W	YDR228C	NON_SYNONYMOUS_CODING	0	0	0	0.9859	0	0	0	0	0	0	0	0	0	0	0	0	0	0	0	0	0	0	0	0	0	0	0	0	0	0	0	0	0	0	0	0	0	0	0	0
chrIV	924544	C	G	10	1	YDR229W	YDR231C	NONE	NONE	0	0	0	0	0	0	0.0054	0	0	0	0	0	0	0	0	0	0	0	0	0.0075	0	0	0	10	0	0	0	0	0	0	0	0	0	0	0	0	0	0	0	0
chrIV	929166	C	T	10	1	YDR234W	YDR232W	NONE	NONE	0	10	0	0	0	0	0	0	0	0	0	0	0	0	0	0	0	0	0	0	0	0	0	0	0	0	0	0	0	0	0.0233	0	0	0	0	0	0	0	0	0
chrIV	931208	T	C	10	1	YDR233C	YDR232W	YDR234W	NON_SYNONYMOUS_CODING	0	0	0	0	0	0	0	0	0	0	0	0	0	0	0	0	0	0	0	0	0	0	0	0	0	0	0	0	0	0	0	0	0	0	0	0	0	0	0	0
chrIV	935089	C	T	10	1	YDR237W	YDR236C	YDR235W	NON_SYNONYMOUS_CODING	0	0	0	0	0	0	0	0	0	0	0	0	0	0	0	0	0	0	0	0	0	0	0	0	0	0	0	0	0	0	0	0	0	0	0	0	0	0	0	0
chrIV	935975	G	A	10	1	YDR236C	YDR235W	NONE	NONE	0	10	0	0	0	0	0	0	0	0	0	0	0	0	0	0	0	0	0	0	0	0	0	0	0	0	0	0	0	0	0.0443	0	0	0	0	0	0	0	0	0
chrIV	942601	T	C	0.9944	1	YDR238C	YDR240C	YDR239C	NON_SYNONYMOUS_CODING	0	0	0	0	0	0	0.9944	0	0	0	0	0	0	0	0	0	0	0	0	0	0	0	0	0	0	0	0	0	0	0	0	0	0	0	0	0	0	0	0	0
chrIV	944151	T	A	0.963	1	YDR239C	YDR243C	YDR240C	SYNONYMOUS_CODING	0	0	0	0	0	0	0	0	0	0	0	0	0	0.963	0	0	0	0	0	0	0	0	0	0	0	0	0	0	0	0	0	0	0	0	0	0	0	0	0	0
chrIV	945797	T	A	10	1	tY(GUA)D	YDR241W	NONE	NONE	0	0	0	0	0	0	0	0	0	10	0	0	0	0	0	0	0	0	0	0	0	0	0	0	0	0	0	0	0	0	0	0	0	0	0	0	0	0	0	0
chrIV	949487	T	C	10	1	YDR244W	YDR242W	YDR243C	SYNONYMOUS_CODING	0	0	0	0	0	0	0	0	0	0	0	0	0	0	0	0	0	0	0	0	10	0	0	0	0	0	0	0	0	0	0	0	0	0	0	0	0	0	0	0
chrIV	950426	T	C	10	1	YDR244W	YDR242W	NONE	NONE	0	0	0	0	0	0	0	0	0	0	0	0	0	0	0	0	0	0	0	0	0	0	0	0	0	0	0	0	0	0	0	0	0	0	0	0	0	0	0	0
chrIV	952209	T	G	10	1	YDR245W	YDR242W	YDR244W	NON_SYNONYMOUS_CODING	0	0	0	0	0	0	0	0	0	0	0	0	0	0	0	0	0	0	0	0	0	0	0	0	10	0	0	0	0	0	0	0	0	0	0	0	0	0	0	0
chrIV	954288	G	T	0.996	1	YDR246W-A	YDR245W	YDR246W	NON_SYNONYMOUS_CODING	0	0	0	0	0	0	0	0	0	0	0	0	0	0	0	0	0	0	0.0081	0	0	0	0	0	0	0	0	0	0	0	0	0	0	0	0	0	0	0	0	0
chrIV	957838	C	G	0.9948	1	YDR251W	YDR247W	YDR248C	NON_SYNONYMOUS_CODING	0.0057	0	0	0	0	0	0	0	0	0	0	0	0	0	0	0.9948	0	0	0	0	0	0	0	0	0	0	0	0	0	0	0	0	0	0	0	0	0	0	0	0
chrIV	958987	G	A	10	1	YDR248C	YDR250C	YDR249C	SYNONYMOUS_CODING	0	0	0	0	0	0	0	0	0	0	0	0	0	0	0	0	0	0	0	0	0	0	0	0	0	0	0	0	0	0	0	0	0	0	0	10	0	0	0	0
chrIV	962815	C	T	0.9953	1	YDR252W	YDR253C	YDR251W	SYNONYMOUS_CODING	0	0	0	0	0	0	0	0	0	0	0	0	0	0	0	0	0	0	0	0	0	0	0	0	0	0	0	0	0	0	0	0	0	0.9953	0	0	0	0	0	0.0217
chrIV	966604	C	A	10	1	YDR253C	YDR254W	YDR255C	NON_SYNONYMOUS_CODING	0	0	0	0	0	0	0	0	0	0	10	0	0	0	0	0	0	0	0	0	0	0	0	0	0	0	0	0	0	0	0	0	0	0	0	0	0	0	0	0
chrIV	970726	A	G	10	1	YDR256C	YDR258C	YDR257C	NON_SYNONYMOUS_CODING	0	0	0	0	0	0	0	0	0	0	0	0	0.0058	0	0	0	0	0	0	0	0	0	0	0	0	0	0	0	0	0	0	0	0	0	0	0	0	0	0	0
chrIV	974644	G	A	0.9932	1	YDR258C	YDR260C	YDR259C	NON_SYNONYMOUS_CODING	0	0	0	0	0	0	0	0	0	0	0	0	0	0	0	0	0	0	0	0	0	0	0	0	0	0	0	0.9932	0	0.0076	0	0	0	0	0	0	0	0	0	0
chrIV	975798	C	A	10	1	YDR259C	YDR260C	NONE	NONE	0	0	0	0	0	0	0	0	0	0	0	0	0	0	0	0	0	0	0	0	0	0	0	0	0.0075	0	0	0	0	0	0	0	0	0	0	0	0	0	0	0
chrIV	979141	G	T	10	1	YDR260C	tS(AGA)D2	YDR261C	SYNONYMOUS_CODING	0	0	0	0	0	0	0	0	0	0	0	0	0	0	0	0	0	0	0	0	0	0	0	0	0.0088	10	0	0	0	0	0	0	0	0	0	0	0.0074	0	0	0
chrIV	980173	A	T	0.9867	1	YDR261C	tS(AGA)D2	NONE	NONE	0	0	0	0	0	0	0	0	0	0	0	0	0	0	0	0	0	0	0	0	0	0	0	0	0	0	0	0	0	0	0	0	0	0	0	0	0	0	0	0
chrIV	980959	T	A	10	1	YDR261W-A	tS(AGA)D2	NONE	NONE	0	0	0	0	0	0	0	0	0	0	0	0	0	0	0	0	0	0	0	0	0	0	0	0	0	0	0	0	0	0	0	0	0	0	0	0	0	0	0	0
chrIV	992562	T	C	0.8566	1	YDR261C-C	YDR263C	NONE	NONE	0	0	0	0	0	0	0	0	0	0	0	0	0	0	0	0	0	0	0	0	0	0	0	0	0	0	0	0	0	0	0	0	0	0	0	0	0	0	0	0
chrIV	992830	C	A	10	1	YDR262W	YDR263C	tG(GCC)D2	EXON	0	0	0	0	0	10	0	0	0	0	0	0	0	0.009	0	0	0	0	0	0	0	0	0	0	0	0	0	0	0	0	0	0	0	0	0	0	0	0.0081	0	0
chrIV	992899	A	T	10	1	YDR262W	YDR263C	tG(GCC)D2	EXON	0	0	0	0	0	0	0	0	0	0	0	0	0	0	0	0	0	0	0	0	0	0	0	0	0	0	0	0	0	0	0	0	0	0	0	0	0	0	0	0
chrIV	995403	A	T	0.6727	0	YDR261C-C	YDR264C	YDR263C	SYNONYMOUS_CODING	0	0	0	0	0	0	0	0	0	0	0	0	0	0	0	0	0	0	0	0	0	0	0	0	0	0	0	0	0	0	0	0	0	0	0	0	0	0	0	0
chrIV	996643	A	T	10	1	YDR263C	YDR262W	YDR264C	NON_SYNONYMOUS_CODING	0	0	0	0	0	0	0	0	0	0	0	0	0	0	0	0	0	0	0	0	0	0	0	0	0	0	0	0	0	0	0	0	0	0	0	0	0	10	0	0
chrIV	998345	G	A	10	1	YDR264C	YDR266C	NONE	NONE	0	0	0	0	0	0	0	0	0	0	0	0	0	0	0	0	0	0	0	0	0	0	0	0	0	0	0	0	0	0	0	0	0	0	0	0	0	0	0	0
chrIV	1000255	T	C	10	1	YDR264C	YDR265W	YDR266C	NON_SYNONYMOUS_CODING	0	0	0	0	0	0	0	0	0	0	0	0	0	0	0	0	0	0	0	0	0	0	0	0	0	0	0	0	0	0	0	0	0	0	0	0	0	0	0	0
chrIV	1002171	T	C	10	1	YDR266C	YDR267C	NONE	NONE	0	0	0	0	0	0	0	0	0	0	0	0	0	0	0	0	0	0	0	0	0	0	0	0	0	0	0	0	0	0	0	0	0	0	0	0	0	0	0	0
chrIV	1007090	A	T	10	1	YDR269C	YDR271C	YDR270W	NON_SYNONYMOUS_CODING	0	0	0	0	0	0	0	0	0	0	0	0	0	0	0	0	0	0	0	0	0	0	0	0	0	0	0	0	0	0	0	0	0	0	0	0	0	0	0	0
chrIV	1008817	G	A	10	1	YDR271C	YDR270W	NONE	NONE	0	0	0	0	0	0	0	0	0	0	0	0	0	0	0	0	0	0	0	0	0	0	0	0	0	0	0	0	0	0	0	0	0	0	0	0	0	0	0	0
chrIV	1010718	A	T	10	1	YDR275W	YDR274C	YDR273W	NON_SYNONYMOUS_CODING	0	0	0	0	0	0	0	0	0	0	0	0	0	0	0	0	0	0	0	0	0	0	0	0	0	0	0	0	0	0	0	0	0	0.0048	0	0	0	0	0	0
chrIV	1015086	T	C	0.9863	1	YDR276C	YDR278C	YDR277C	NON_SYNONYMOUS_CODING	0	0	0	0	0	0	0	0	0	0	0	0	0	0	0	0	0	0	0	0	0	0	0	0	0	0	0	0	0	0	0	0	0	0	0.9863	0	0	0	0	0
chrIV	1017288	G	A	0.7209	1	tE(CUC)D	YDR275W	YDR278C	NON_SYNONYMOUS_CODING	0	0	0	0	0	0	0	0	0	0	0	0	0	0	0	0	0	0	0	0	0.7209	0	0	0	0	0	0	0	0	0	0	0	0	0	0	0	0	0	0	0
chrIV	1017467	A	T	0.995	1	YDR278C	YDR275W	NONE	NONE	0	0	0	0	0	0	0	0	0	0	0	0.995	0	0	0	0	0	0	0	0	0	0	0	0	0	0	0	0	0	0	0	0	0	0	0	0	0	0	0	0
chrIV	1018309	T	C	10	1	YDR278C	YDR281C	NONE	NONE	0	0	0	0	0	0	0	0	0	0	0	0	0	0	0	0	10	0	0	0	0	0	0	0	0	0	0	0	0	0	0	0	0	0	0	0	0	0	0	0
chrIV	1020385	G	T	0.6489	0	YDR280W	YDR281C	YDR279W	NON_SYNONYMOUS_CODING	0	0	0	0	0	0	0	0	0	0	0	0	0	0	0	0	0	0	0	0	0.6489	0	0	0	0	0	0	0	0	0	0	0	0	0	0	0	0	0	0	0
chrIV	1028363	C	G	0.9945	1	YDR282C	YDR284C	YDR283C	NON_SYNONYMOUS_CODING	0	0	0	0	0	0	0	0	0	0	0	0	0	0	0	0	0	0	0	0	0	0	0	0	0	0	0	0	0	0	0	0	0	0	0	0	0	0	0	0
chrIV	1029092	C	T	0.6433	0	YDR285W	YDR284C	YDR283C	NON_SYNONYMOUS_CODING	0	0	0	0	0	0	0.0053	0	0	0	0	0	0	0	0	0	0	0	0	0	0	0	0	0	0	0	0	0	0	0	0	0	0.0057	0	0	0	0	0	0	0
chrIV	1038837	C	G	0.9944	1	YDR290W	YDR288W	YDR289C	NON_SYNONYMOUS_CODING	0	0	0	0	0	0	0	0	0	0	0	0	0.9944	0	0	0	0	0	0	0	0	0	0	0	0	0	0	0	0	0	0	0	0	0	0	0	0	0	0	0
chrIV	1050044	C	G	10	1	YDR293C	YDR294C	NONE	NONE	0	0	0	0	0	0	0	0	0	0	0	0	0	0	0	0	0	0	0	0	0	0	0	0	0	0	0	0	0	0	0	0	0	0	0	0	0	0	0	0
chrIV	1050212	G	A	0.9939	1	YDR293C	YDR294C	NONE	NONE	0	0	0	0	0	0	0	0	0	0	0	0.0063	0	0	0	0	0	0	0	0	0	0	0	0	0	0	0	0.9939	0	0	0	0	0	0	0	0	0	0	0	0
chrIV	1054575	C	T	10	1	YDR296W	YDR298C	YDR295C	NON_SYNONYMOUS_CODING	0	10	0	0	0	0	0	0	0	0	0	0	0	0	0	0	0	0	0	0	0	0	0	0	0	0	0	0	0	0	0.0402	0	0	0	0	0	0	0	0	0
chrIV	1060133	A	G	10	1	YDR298C	YDR300C	YDR299W	SYNONYMOUS_CODING	0	0	0	0	0	0	0.0106	0	10	0	0	0	0	0	0	0	0	0	0	0	0	0	0	0	0	0	0	0	0	0	0	0	0	0	0	0	0	0	0	0
chrIV	1060649	G	C	0.983	1	YDR298C	YDR300C	YDR299W	NON_SYNONYMOUS_CODING	0	0	0	0	0	0	0	0	0	0	0	0	0	0	0	0	0	0	0	0	0	0	0	0	0	0	0	0	0	0	0	0	0	0	0	0	0	0	0	0
chrIV	1064820	T	C	0.9957	1	YDR300C	YDR299W	YDR301W	NON_SYNONYMOUS_CODING	0	0	0	0	0	0	0	0	0	0	0	0	0	0	0	0	0	0	0	0	0	0	0	0	0	0	0	0	0	0	0	0	0	0	0	0	0	0	0	0
chrIV	1067655	G	C	10	1	YDR302W	YDR301W	NONE	NONE	0	10	0	0	0	0	0	0	0	0	0	0	0	0	0	0	0	0	0	0	0	0	0	0	0.0055	0	0	0	0	0	0.0455	0	0	0	0	0	0.0043	0	0	0
chrIV	1072312	G	T	10	1	YDR303C	YDR305C	YDR304C	NON_SYNONYMOUS_CODING	0	0	0	10	0	0	0	0	0	0	0	0	0	0	0	0	0	0	0	0	0	0	0	0	0	0	0	0	0	0	0	0	0	0	0	0	0	0	0	0
chrIV	1073916	G	T	0.9667	1	YDR305C	tV(CAC)D	YDR306C	NON_SYNONYMOUS_CODING	0	0	0	0	0	0	0	0	0	0	0	0	0	0	0	0	0	0	0	0	0	0	0	0	0	0	0	0	0	0	0	0	0	0	0	0	0.0051	0	0	0
chrIV	1075491	C	T	10	1	YDR306C	YDR308C	tV(CAC)D	EXON	0	0	0	0	0	0	0	0	0	0	0	0	0	0	0	0	0	0	0	0	0	0	0	10	0	0	0	0	0	0	0	0	0	0	0	0	0	0	0	0
chrIV	1082507	T	C	10	1	YDR309C	YDR307W	YDR310C	NON_SYNONYMOUS_CODING	0	0	0	0	0	0	0	0	0	0	0	0	0	0	0	0	0	0	0	0	0	0	0	0	0	0	0	0	0	0	0	0	0	0	0	0	0	0	0	0
chrIV	1088686	A	G	0.993	1	YDR310C	YDR313C	YDR312W	NON_SYNONYMOUS_CODING	0	0	0	0	0	0	0	0	0	0	0	0	0	0	0	0	0	0	0	0	0	0	0	0	0	0	0	0	0	0	0	0	0	0	0	0	0	0	0	0
chrIV	1092838	T	A	10	1	YDR314C	tF(GAA)D	YDR315C	SYNONYMOUS_CODING	0	0	0	0	0	0	0	0	0	0	0	0	0	0	0	0	0	0	0	0	0	0	0	10	0	0	0	0	0	0	0	0	0	0	0	0	0	0	0	0
chrIV	1094515	C	G	10	1	YDR315C	tF(GAA)D	YDR316W	NON_SYNONYMOUS_CODING	0	0	0	0	0	0	0	0	0	0	0	0	0	0	0	0	0	0	0	0	0	0	0	0	0	0	0	0	0	0	0	0	0	0	0	0	0	0	0.0066	0
chrIV	1095412	C	G	0.9712	1	YDR316W-A	YDR316W	tF(GAA)D	INTRON	0	0	0	0	0	0	0.9712	0	0	0	0	0	0	0	0	0	0	0	0	0	0	0	0	0	0	0	0	0	0	0	0	0	0	0	0	0	0	0	0	0
chrIV	1111735	C	G	10	1	YDR320C-A	YDR322W	NONE	NONE	0	0	0	0	0	0	0	0	0	0	0	0	0	0	0	0	0	0	0	0	0	0	0	0	0	0	0.0048	0	0	10	0	0	0	0	0	0	0	0	0	0
chrIV	1114184	G	A	0.9976	1	YDR323C	YDR324C	NONE	NONE	0	0	0	0	0	0	0	0	0	0	0	0	0	0	0	0	0	0	0	0	0	0	0	0	0	0	0	0	0	0	0	0	0	0	0	0	0	0	0	0
chrIV	1125232	A	G	10	1	YDR327W	YDR328C	NONE	NONE	0	0	0	0	0	0	0	0.0073	0	0	0	0	0	0	0	0	0	0	0	0	0	0	0	0	0	0	0	0	0	0	0	0	0	0	0	0	0	0	0	0
chrIV	1127495	A	G	10	1	YDR330W	YDR327W	YDR329C	NON_SYNONYMOUS_CODING	0	0	0	10	0	0	0	0	0	0	0	0	0	0	0	0	0	0	0	0	0	0	0.0093	0	0	0	0	0	0	0	0	0	0	0	0	0	0	0	0	0
chrIV	1147492	T	C	10	1	YDR340W	YDR337W	YDR338C	NON_SYNONYMOUS_CODING	0	0	0	0	0	0	0	0	0	0	0	0	0	0.0047	0	0	0	0	0	0	0	0	0	0	0	0	0	0	0	0	0	0	0	0	0	0	0	0	0	0
chrIV	1150897	G	A	10	1	YDR339C	YDR341C	YDR340W	NON_SYNONYMOUS_CODING	0	0	0	0	0	0	0	0	0	0	0	0	0	0	0	0	0	0	0	0	0	0	0	0	0	0	0	0	0	0	0	0	0	0	0	0	0	0	0	0
chrIV	1152457	T	A	10	1	tX(XXX)D	YDR340W	YDR341C	NON_SYNONYMOUS_CODING	0	0	0	0	0	0	0	0	0	0	0	0	0	0	0	0	0	0	0	0	0	0	0	0	0	0	0	0	0	0	0	0	0	0	0	0	0	0	0	0
chrIV	1166412	T	C	10	1	YDR345C	YDR346C	NONE	NONE	0	0	0	0	0	0	0	0	0	0	0	0	0	0	0	0.0046	0	0	0	0.0109	0	0	0	0	0	0	0	0	0	0	0	0	0	0	0	0	0	0	0	0
chrIV	1170008	C	A	0.9857	1	YDR346C	YDR348C	YDR347W	NON_SYNONYMOUS_CODING	0	0	0	0	0	0	0	0	0.0045	0	0	0	0	0	0	0	0	0	0	0	0	0	0	0	0	0	0	0	0.9857	0	0	0	0	0	0	0	0	0	0	0
chrIV	1171374	A	T	0.6519	0	YDR346C	YDR349C	YDR348C	NON_SYNONYMOUS_CODING	0	0	0	0	0	0	0	0	0	0	0	0	0	0	0	0	0	0	0	0	0	0	0	0	0	0	0	0	0	0	0	0	0	0	0	0	0	0	0	0
chrIV	1178574	A	T	10	1	YDR351W	tM(CAU)D	NONE	NONE	0	0	0	0	0	0	0	0	0	0	0	0	0	0	0	0	0	0	0	0	0	0	0	0	0	0	0	0	0	0	0	0	0	0	0	0	0	0	0	0
chrIV	1183879	A	C	0.9948	1	YDR354W	YDR352W	YDR353W	NON_SYNONYMOUS_CODING	0	0	0	0	0	0	0	0	0	0	0	0	0	0	0	0	0	0	0	0	0	0	0	0	0	0	0.9948	0	0	0	0	0	0	0	0	0	0	0	0	0
chrIV	1185470	C	A	10	1	YDR354C-A	YDR355C	YDR354W	NON_SYNONYMOUS_CODING	0	0	10	0.0062	0	0	0	0	0	0	0	0	0	0	0	0	0	0	0	0	0	0	0	0	0	0	0	0	0	0	0	0	0	0	0	0	0	0	0	0
chrIV	1188496	A	T	0.9949	1	YDR358W	YDR357C	YDR356W	NON_SYNONYMOUS_CODING	0	0	0	0	0	0	0	0	0.9949	0	0	0	0	0	0	0	0	0	0	0	0	0	0	0	0	0	0	0	0	0	0	0	0	0	0	0	0	0	0	0
chrIV	1194255	G	C	0.8381	1	YDR360W	YDR361C	YDR359C	SYNONYMOUS_CODING	0	0	0	0	0	0	0	0	0	0	0	0	0	0	0	0	0	0	0	0	0	0	0	0	0	0	0	0	0	0	0	0	0	0	0	0	0	0	0	0
chrIV	1197202	T	C	0.8765	1	YDR361C	YDR360W	YDR362C	NON_SYNONYMOUS_CODING	0	0	0	0	0	0	0	0	0	0	0	0	0	0	0	0	0	0.0063	0.8765	0	0	0	0	0	0	0	0	0	0	0	0	0	0	0	0	0	0	0	0	0
chrIV	1197449	A	G	0.9635	1	YDR361C	YDR360W	YDR362C	SYNONYMOUS_CODING	0	0	0	0	0	0	0	0	0	0	0	0	0	0	0	0	0	0	0	0	0	0	0	0	0	0	0	0	0	0	0	0	0	0	0	0	0	0	0	0
chrIV	1197709	G	T	10	1	YDR361C	YDR360W	YDR362C	NON_SYNONYMOUS_CODING	0	0	0	0	0	0	0	0	0	0	0	0	0	0	0	0	0	0	0	0	0	0	0	0	0	0	0	0	0	0	0	0	0	0	0	0	0	0	0	0
chrIV	1199546	A	G	10	1	YDR362C	YDR364C	YDR363W	NON_SYNONYMOUS_CODING	0	0	0	0	0	0	0	0	0	0	0	0	0	0	0	0	0	0	0	0	0	0	0	0	0	0	0	0	10	0	0	0	0	0	0	0	0	0	0	0
chrIV	1201768	G	T	0.6667	0	YDR363W-A	YDR364C	tK(CUU)D1	EXON	0	0	0	0	0	0	0	0	0	0	0	0	0	0	0	0	0	0	0	0	0	0	0	0	0.0098	0	0	0	0	0	0	0	0	0	0	0	0	0	0	0
chrIV	1201809	C	T	10	1	YDR363W-A	YDR364C	tK(CUU)D1	EXON	0	0	0	0	0	0	0	0	0	0	0	0	0	0	0	0	0	0	0	0	0	0	0	0	0	0	0	0	0	0	0	0	0	0	0	0	0	0	0	0
chrIV	1214099	A	G	0.4074	0	YDR366C	YDR367W	YDR368W	NON_SYNONYMOUS_CODING	0	0	0	0	0	0	0	0	0	0	0	0	0	0	0	0	0	0	0	0	0	0	0	0	0	0	0	0	0	0	0	0	0	0	0	0	0	0.0073	0	0
chrIV	1219513	A	T	10	1	YDR370C	YDR372C	YDR371W	NON_SYNONYMOUS_CODING	0	0	0	0	0	0	0	0	0	0	0	0	0	0	0	0	0	0	0	0	0	0	0	0	0	0	0	0	0	0	0	0	0	0	0.0081	0	0	0	0	0
chrIV	1219654	C	G	10	1	YDR371C-A	YDR372C	YDR371W	SYNONYMOUS_CODING	0	0	0	0	0	0	0	0	0	0	0	0	0	0	0	0.0043	0	0	0	0	0	0	0	0	0	0	0	0	0	0	0	0	0	0	0	0	0	0	0	0
chrIV	1225106	A	T	10	1	YDR374C	YDR375C	NONE	NONE	0	0	0	0	0	0.0057	0	0	0	0	0	0	0	0	0	0	0	0	0	0	0	0	0	0	0	0	0	0	0	0	0	0	0	0	0	0	0	0	0	0
chrIV	1226164	T	C	10	1	YDR376W	YDR374W-A	YDR375C	SYNONYMOUS_CODING	0	0	0	0	0	0	0	0	0	0	0	0	0	0	0	0	0	0	0	10	0	0	0	0	0	0	0	0	0	0	0	0	0	0	0	0	0	0	0	0
chrIV	1227774	C	G	10	1	YDR377W	YDR378C	YDR376W	NON_SYNONYMOUS_CODING	0	0	0	0	0	0	0	0	0	0	0	0	0	0	0	0	0	0	0	0	0	0	0	0	0	0	0	0	0	0	0	0	0	0	0	0	0	0	0	0
chrIV	1233581	C	T	10	1	YDR379C-A	YDR379W	NONE	NONE	0	0	0	0	0	0	0	0	0	0	0	0	0	0	0	0	0	0	0	0	0	0	0	0	0	0	0	0	0	0	0	0	0	0	0	0	0	0	0	0
chrIV	1236867	T	C	0.9957	1	YDR382W	YDR380W	YDR381W	INTRON	0	0	0	0	0	0	0	0	0	0	0	0	0	0	0	0	0	0	0	0	0	0	0	0	0	0	0	0	0	0	0	0	0	0	0	0	0	0	0	0
chrIV	1237167	T	C	10	1	YDR382W	YDR380W	YDR381W	INTRON	0	0	0	0	0	0	0	0	0	0	0	0	0	0	0	0	0	0	0	0	0	0	0	0	0	0	0	0	0	0	0	0	0	0	0	0	0	0	0	0
chrIV	1242397	C	A	10	1	YDR384C	YDR382W	NONE	NONE	0	0	0	0	0	0	0	0	0.0094	0	0	0	0	0	0	0	0	0	0	0	10	0	0	0	0	0	0	0	0	0	0	0	0	0	0	0	0	0	0	0
chrIV	1243057	T	A	10	1	YDR385W	YDR382W	NONE	NONE	0	0	0	0	0	0	0	0	0	0	0	0	0	0	0.0068	0	0	0	0	0	0	0	0	0	0	0	0	0	0	0	0	0	0	0	0	0	0	0	0	0
chrIV	1253382	G	C	0.9936	1	YDR387C	YDR390C	YDR389W	NON_SYNONYMOUS_CODING	0	0	0	0	0	0	0	0	0	0	0	0	0	0	0	0	0	0	0	0	0	0	0	0	0	0	0	0	0	0.9936	0	0	0	0	0	0	0	0	0	0
chrIV	1255898	G	T	10	1	YDR392W	tG(CCC)D	YDR390C	NON_SYNONYMOUS_CODING	0	0	0	0	0.0076	0	0	0	0	0	0	0	0	0	0	0	0	0	0	0	0	0	0	0	0	0	0	0	0	0	0	0	0	0	0	0	0	0	0	0
chrIV	1257060	G	T	10	1	YDR390C	YDR391C	tG(CCC)D	EXON	0	0	0	0	0	0	0	0	0	0	0	0	0	0	0	0	0	0	0	0	0.0093	0	0	0	0	0	0	0	0	0	0	0	0	0	0	0	0	0.0167	0	0
chrIV	1257085	G	C	10	1	tG(CCC)D	YDR391C	NONE	NONE	0	0	0	0	0	0	0	0	0	0	0	0	0	0	0	0	0	0	0	0	0	0	0	0	0	0	0	0	0	0	0	0	0	0	0	0	0	0	0	0
chrIV	1257658	C	A	0.9877	1	tG(CCC)D	YDR389W	YDR391C	NON_SYNONYMOUS_CODING	0	0	0	0	0	0	0	0	0	0	0	0	0	0	0	0	0	0.9877	0	0	0	0	0.0062	0	0	0	0	0	0	0	0	0	0	0	0	0	0	0	0	0
chrIV	1259591	A	G	0.9917	1	YDR393W	NONE	YDR392W	SYNONYMOUS_CODING	0	0	0	0	0	0	0	0	0	0	0	0	0	0	0	0	0	0	0	0	0	0	0	0	0	0	0	0	0	0	0	0	0	0	0	0	0	0	0	0
chrIV	1263410	T	C	0.9943	1	YDR396W	YDR394W	YDR395W	NON_SYNONYMOUS_CODING	0	0	0	0	0	0	0	0	0	0	0	0	0	0	0	0	0	0	0	0	0	0	0	0	0	0	0	0	0	0	0	0	0	0	0	0	0.9943	0	0	0
chrIV	1276829	T	G	10	1	YDR405W	YDR403W	YDR404C	NON_SYNONYMOUS_CODING	0	0	0	0	0	0	0	0	0	0	0	0	0	0	0	0	0	0	0	0	0	0	0	0	0	0	0	0	0	0	0	0	0	0	0	0	0	0	0	0
chrIV	1277360	C	A	10	1	YDR404C	YDR403W	NONE	NONE	0	0	0	0	0	0	0	0	0	0	0	0	0	0	0	10	0	0	0	0	0	0	0	0	0	0	0	0	0	0	0	0	0	0	0	0	0	0	0	0
chrIV	1284853	G	A	0.9856	1	YDR409W	YDR406W-A	YDR407C	NON_SYNONYMOUS_CODING	0	0	0	0	0	0	0	0	0	0	0	0	0	0	0	0	0	0	0	0	0	0	0	0	0	0	0	0	0	0	0	0	0	0	0	0	0	0	0	0
chrIV	1287296	G	T	10	1	YDR409W	YDR408C	YDR407C	NON_SYNONYMOUS_CODING	0	0.0125	0	0	0	0	0	0	0	0	0	0	0	0	0	0	0	0	0	0	0	0	0	0	0	0	0	0	0	0	0	0	0	0	0	0	0	0	0	0
chrIV	1292676	T	C	0.9944	1	YDR412W	YDR409W	YDR410C	NON_SYNONYMOUS_CODING	0	0	0	0	0	0.0044	0	0	0	0	0	0	0	0	0	0	0	0	0	0	0	0	0	0	0	0	0	0	0	0	0	0	0	0	0	0	0	0	0	0
chrIV	1296085	G	A	0.9939	1	YDR413C	YDR412W	YDR414C	SYNONYMOUS_CODING	0	0	0	0	0.0038	0	0	0	0	0	0	0	0	0	0	0	0	0	0	0	0	0	0	0	0	0	0	0	0	0	0	0	0	0	0	0	0	0	0	0
chrIV	1309441	C	T	0.9864	1	YDR421W	tS(AGA)D3	YDR420W	NON_SYNONYMOUS_CODING	0	0	0	0	0	0	0	0	0	0	0	0	0	0	0	0	0	0	0	0	0	0	0	0	0	0	0	0	0	0	0	0	0	0.004	0	0	0	0	0	0
chrIV	1322231	A	T	10	1	YDR426C	YDR425W	YDR427W	NON_SYNONYMOUS_CODING	0	0	0	0	0	0	0	0	0.0065	10	0	0	0	0.006	0	0	0	0	0	0	0	0	0	0	0	0	0	0	0	0	0	0	0	0	0	0	0	0	0	0
chrIV	1323469	T	C	10	1	YDR426C	YDR427W	YDR428C	NON_SYNONYMOUS_CODING	0	10	0	0	0	0	0	0	0	0	0	0	0	0	0.0051	0	0	0	0	0	0	0	0	0	0	0	0	0	0	0	0	0	0	0	0	0	0	0	0	0
chrIV	1326075	G	A	0.8113	1	YDR429C	YDR427W	YDR430C	NON_SYNONYMOUS_CODING	0	0	0	0	0	0	0	0	0	0	0	0	0	0	0	0	0	0	0	0	0	0	0	0	0	0	0	0	0	0	0	0	0	0	0	0	0	0	0	0
chrIV	1328005	T	C	10	1	YDR431W	YDR427W	YDR430C	SYNONYMOUS_CODING	0	0	0	0	0	0	10	0	0	0	0	0	0	0	0	0	0	0	0	0	0	0	0	0	0	0	0	0	0	0	0	0	0	0	0	0	0	0	0	0
chrIV	1329995	C	G	0.9919	1	YDR434W	YDR431W	YDR433W	NON_SYNONYMOUS_CODING	0	0	0	0	0	0	0	0	0	0	0	0	0	0	0	0	0	0	0	0	0	0	0	0	0	0	0	0	0	0	0	0	0	0	0	0	0	0	0	0
chrIV	1330745	G	T	0.9669	1	YDR434W	YDR433W	NONE	NONE	0	0	0	0	0	0	0	0	0	0	0	0	0	0	0	0	0	0	0	0	0	0	0	0.9669	0	0	0	0.0057	0	0	0	0	0	0	0	0	0	0	0	0
chrIV	1331333	C	T	10	1	YDR430C	YDR433W	YDR434W	NON_SYNONYMOUS_CODING	0	0	0	0	0	0	0	0	0	0	0	0	0	0	0	0	0	0	0	0	0	0	0	0	0	0	0	0	0	0	0	0	0	0	0	0	0	0	0	0
chrIV	1331545	A	G	10	1	YDR430C	YDR435C	YDR434W	NON_SYNONYMOUS_CODING	0	0	0	0	0	0	0	0	0	0	0	0	0	0	0	0	0	0	0	0	0	0	0	0	0	0	0	0	0	0	0	0	0	0	0	0	0	0	0	0
chrIV	1333493	G	A	0.9949	1	YDR436W	YDR434W	YDR435C	NON_SYNONYMOUS_CODING	0	0	0	0	0	0	0	0	0	0	0	0	0	0	0	0	0	0	0	0	0	0	0	0	0	0	0	0	0	0	0	0	0.9949	0	0	0	0	0	0	0
chrIV	1348161	T	A	10	1	YDR444W	YDR442W	YDR443C	NON_SYNONYMOUS_CODING	0	0	0	0	0	0	0	0	0	0	0	0	0	0	0	0	0	0	0	0	0	10	0	0	0	0	0	0	0	0	0	0	0	0	0	0	0	0	0	0
chrIV	1352509	G	A	10	1	YDR446W	YDR444W	YDR445C	NON_SYNONYMOUS_CODING	0	0	0	0	0	0	0	0	0	0	0	0	0	0	0	0	0	0	0	0	0	0	0	0	0	0	0	0	0	0	0	0	0	0	0	0	0	0	0	0
chrIV	1354927	A	T	10	1	YDR448W	YDR446W	YDR447C	SYNONYMOUS_CODING	0	0	0	0	0	0	0	0	0	0	0	0	0	0	0	0	0	0	0	0	0	0	0	0	0	0	0	0	0	0	0	0	0	0	0	0	0	0	0	0
chrIV	1366951	G	T	10	1	YDR454C	YDR455C	NONE	NONE	0	0	0	0	0	0	0	0	0	0	0	0	0	0	0	0	0	0	0	0	0	0	0	0	0	0	0	0	0	0	0	0	0	0	0	0	0	0	0	0
chrIV	1373135	G	A	0.9319	1	NONE	YDR456W	YDR457W	NON_SYNONYMOUS_CODING	0	0	0	0	0	0	0	0	0	0	0	0	0	0	0	0	0.0059	0	0	0	0	0	0	0	0	0	0	0	0	0	0.9319	0	0	0	0	0	0	0	0	0
chrIV	1374603	C	T	10	1	NONE	NONE	YDR457W	SYNONYMOUS_CODING	0	0	0	0	0	0	0	0	0	0	0	0	0	0	0	0	0	10	0	0	0	0	0	0	0	0	0	0	0	0	0	0.0068	0	0	0	0	0	0	0	0
chrIV	1377102	C	T	0.9118	1	NONE	YDR458C	YDR457W	SYNONYMOUS_CODING	0	0	0	0	0	0	0	0	0	0	0	0	0	0	0	0	0	0	0.9118	0	0	0	0	0	0	0	0	0	0	0	0	0	0	0	0	0	0	0	0	0
chrIV	1378319	C	A	10	1	NONE	YDR458C	YDR457W	NON_SYNONYMOUS_CODING	0	0	0	0	0	0	0	0	0	0	0	0	0	0	0	0	0	0	0	0	0	0	0	0	0	0	0	0	0	0	0	0	0.0048	0	0	0	0	0	0	0
chrIV	1381540	T	A	10	1	YDR460W	YDR459C	YDR458C	NON_SYNONYMOUS_CODING	0	0	0	0	0	0	0	0	0	0	0	0	0	0	0	0	10	0	0	0	0	0	0	0	0	0	0	0	0	0	0	0	0	0	0	0	0	0	0	0
chrIV	1382182	G	T	10	1	YDR458C	YDR459C	NONE	NONE	0	0	0	0	0	0	0	0	0	0	0	0	0	0	0	0	0	0	0	0	0	0	0.007	0	0	0	0	0	0	0.0136	0	0	0	0	0	0	0	0	0	0
chrIV	1385443	T	C	10	1	YDR462W	YDR461C-A	NONE	NONE	0	0	0	0	0	0	0	0	0	0	0	0	0	0	0	0	0	0	0	0	0	0	0	0	0	0	0	0	0	0	0	0	0	0	10	0	0	0	0	0
chrIV	1386775	C	T	10	1	YDR463W	YDR462W	NONE	NONE	0	0	0	0	0	0	0	0	0	0	0	0	0	0	0	0	0	10	0	0	0	0	0	0	0	0	0	0	0	0	0	0	0	0	0	0	0	0	0	0
chrIV	1404125	G	T	0.9934	1	YDR470C	YDR473C	YDR472W	NON_SYNONYMOUS_CODING	0	0	0	0	0	0	0	0	0	0	0	0	0	0	0	0	0	0	0	0	0	0	0	0	0	0	0	0	0	0	0	0	0	0	0	0	0	0	0	0
chrIV	1407229	C	A	10	1	YDR473C	YDR475C	NONE	NONE	0	0	0	0	0	0	0	0	0	0	0	0	0	0	0	0	0	0.0062	0	0	0	0	0	0	0.0047	0	0	0	10	0	0.0052	0	0	0	0	0	0	0	0	0
chrIV	1414779	A	T	0.9577	1	YDR480W	YDR479C	YDR478W	NON_SYNONYMOUS_CODING	0	0	0	0	0	0	0	0	0	0	0	0	0	0.9577	0	0	0	0	0	0	0	0	0	0	0	0	0	0	0	0	0	0	0	0	0	0	0	0	0	0
chrIV	1415521	G	C	10	1	YDR480W	YDR478W	YDR479C	SYNONYMOUS_CODING	0	0	0	0	0	0	0	0	0	0	0	0	0	0	0	0	0	0	0	0	0	0	0	0	0	0	0	0	0	0	0	0	0	0	0	0	0	0	0	0
chrIV	1417804	G	C	10	1	YDR479C	YDR481C	YDR480W	NON_SYNONYMOUS_CODING	0	0	0	0	0	0	0	0	0	0	0	0	0	0	0	0	0	0	0	0	0	0	0	0	0	0	0	0	0	0	0	0	0	0	0	0	0	0	0	0
chrIV	1419702	C	A	10	1	YDR483W	YDR482C	YDR481C	NON_SYNONYMOUS_CODING	0	0	0	0	0	0	0	0	0	10	0	0	0	0	0	0	0	0	0	0	0	0	0	0	0	0	0	0	0	0	0	0	0	0	0	0	0	0	0	0
chrIV	1426347	T	G	10	1	YDR489W	YDR486C	YDR485C	NON_SYNONYMOUS_CODING	0	0	0	0	0	0	0	0	0	0	0	0	0	0	0	0	0	0	0	0	0	0	0	0	0	0	0	0	0	0	0	0	0	0	0	0	0	0	0	0
chrIV	1428209	C	A	10	1	YDR486C	YDR487C	NONE	NONE	0	0	0	0	0	0	0.006	0	0	0	0	0	10	0.0275	0	0	0	0	0	0	0	0	0	0	0	0	0	0	0	0	0	0	0	0	0	0	0	0	0	0
chrIV	1429711	A	G	10	1	YDR487C	YDR490C	YDR488C	NON_SYNONYMOUS_CODING	0	0	0	0	0	0	10	0	0	0	0	0	0	0	0	0	0	0	0	0	0	0	0	0	0	0	0	0	0	0	0.0179	0	0	0	0	0	0	0	0	0
chrIV	1432636	C	A	10	1	YDR488C	YDR489W	YDR490C	NON_SYNONYMOUS_CODING	0	0	0	0	0	0	0	0	0	0	0	0	0	0	0	0	0	0	0	0	0	0	0	0	0	0	0	0	0	0	0	0	0	0	0	0	0	0	0	10
chrIV	1437044	C	G	0.6183	0	YDR491C	YDR493W	YDR494W	NON_SYNONYMOUS_CODING	0	0	0	0	0	0	0	0	0	0	0	0	0	0	0	0	0	0	0	0	0	0	0	0	0	0	0	0	0	0	0	0	0	0	0	0	0	0	0	0
chrIV	1437971	G	T	10	1	YDR491C	YDR495C	YDR494W	NON_SYNONYMOUS_CODING	0	0	0	0	0	0	0	0	0	0	0	0	0	0	0	0	0	0	0	0	0	0	0	0	0	0	0	0	0	0	0	0	0.0049	0	0	0	0	0	0	10
chrIV	1443916	A	T	10	1	YDR496C	YDR498C	YDR497C	NON_SYNONYMOUS_CODING	0	0	0	0	0	0	0	0	0	0	0	0	0	0	0	0	0	0	0	0	0	0	0	0	0	0	0	0	0	0	0	0	0	0	0	0	0	0	0	0
chrIV	1449761	G	C	10	1	YDR501W	YDR500C	YDR499W	NON_SYNONYMOUS_CODING	0	0	0	0	0	0	0	0	0	0	0	10	0	0	0	0	0	0	0	0	0	0	0	0	0	0	0	0	0	0	0	0	0	0	0	0	0	0	0	0
chrIV	1450096	G	A	0.9925	1	YDR501W	YDR499W	NONE	NONE	0	0	0	0	0	0	0	0	0	0	0	0	0	0	0	0	0	0	0	0	0	0	0	0	0.0056	0	0	0	0	0	0	0	0.9925	0	0	0	0	0	0	0.0078
chrIV	1456623	T	C	0.5874	0	YDR503C	YDR505C	YDR504C	NON_SYNONYMOUS_CODING	0	0	0	0	0	0	0	0	0	0.0054	0	0	0	0	0	0	0	0	0	0	0	0	0	0	0	0	0	0	0	0	0	0	0	0	0	0	0	0	0	0
chrIV	1469616	A	G	10	1	YDR511W	YDR510C-A	YDR510W	NON_SYNONYMOUS_CODING	0	0	0	0	0	0	0	0	0	0	0	0	0	0	0	0	0	0	0	0	0	0	0	0	0	0	0	0	0	0	0	0	0	0	0	0	0	10	0	0
chrIV	1469691	C	G	10	1	YDR511W	YDR512C	YDR510W	NON_SYNONYMOUS_CODING	0	0	0	0	0	0	0	0	0	0	0	0	0	0	0	0	0	0	0	0	0	0	0	0	0	0	0	0	0	0	0	0	0	0	0	0	0	0	0	0
chrIV	1477257	T	A	10	1	YDR516C	YDR515W	YDR517W	NON_SYNONYMOUS_CODING	0	0	0	0	0	0	0	0	0	0	0	0	0	0	0	0	0	0	0	0	0	0	0	0	0	0	0	0	0	0	0	0	0	0	0.01	0	0	0	0	0
chrIV	1482110	C	A	10	1	YDR521W	YDR519W	YDR520C	SYNONYMOUS_CODING	0	0	0	0	0	0	0	0	0	0	0	0	0	0	0	0	0	0	0	0	0	0	0	0	0	0	0	0	0	0	0	0	0	0	0	0	0	0	0	0
chrIV	1484077	C	G	0.9951	1	YDR520C	YDR521W	YDR522C	NON_SYNONYMOUS_CODING	0	0	0	0	0	0	0	0	0	0	0	0	0	0	0	0	0	0	0	0	0	0	0	0	0	0	0	0	0	0	0	0	0	0	0	0.9951	0	0	0	0
chrIV	1484700	C	A	10	1	YDR520C	YDR523C	YDR522C	NON_SYNONYMOUS_CODING	0	0	0	0	0	0	10	0	0	0	0	0	0	0	0	0	0	0	0	0	0	0	0	0	0	0	0	0	0	0	0	0	0	0	0	0	0	0	0	0.0058
chrIV	1485898	C	T	10	1	YDR522C	YDR524C	YDR523C	SYNONYMOUS_CODING	0	0	0	0	0	0	0	0	0	0	0	0	0	0	0	0	0	0	0	0	0	0	0	0	0	0	0	0	0	0	0	0	0	0	0	0	0	0	10	0
chrIV	1489310	C	A	0.9371	1	YDR524W-C	YDR524C-B	NONE	NONE	0	0	0	0	0	0	0	0	0	0	0	0	0	0.9371	0	0	0	0	0	0	0	0	0	0	0	0	0	0	0	0	0	0	0	0	0	0	0	0	0	0
chrIV	1489388	G	T	0.9906	1	YDR524W-C	YDR524C-B	NONE	NONE	0	0	0	0	0	0	0	0	0	0	0	0	0	0	0	0	0	0	0	0	0	0	0	0	0	0	0	0	0	0	0	0	0	0	0	0	0	0	0	0
chrIV	1489877	T	A	10	1	YDR525W	YDR524W-C	YDR524C-A	NON_SYNONYMOUS_CODING	0	0	0	0	0	0	0	0	0	0	0	0	0	0	0	0	0	0	0	0	0	0	0	0	0	0	0	0	0	0	0	0	0	0	0	0	0	0	10	0
chrIV	1489883	A	G	10	1	YDR525W	YDR524W-C	YDR524C-A	NON_SYNONYMOUS_CODING	0	0	0	0	0	0	0	0	0	0	0	0	0	0	0	0	0	0	0	0	0	0	0	0	0	0	0	0	0	0	0	0	0	0	0	0	0	0	10	0
chrIV	1492049	A	G	0.9453	1	YDR526C	snR84	YDR527W	SYNONYMOUS_CODING	0	0	0	0	0	0	0	0	0	0	0	0	0	0.9453	0	0	0	0	0	0	0	0	0	0	0	0	0	0	0	0	0	0	0	0	0	0	0	0	0	0
chrIV	1493772	T	C	0.9803	1	snR84	YDR527W	NONE	NONE	0	0	0	0	0	0	0	0.9803	0.0047	0	0	0	0	0	0	0	0	0	0	0	0	0	0	0	0	0	0	0	0	0	0	0	0	0	0	0	0	0	0	0
chrV	5996	G	A	0.9487	1	YEL074W	YEL075W-A	NONE	NONE	0	0	0	0	0	0	0	0	0	0	0	0	0	0	0	0	0	0	0	0	0	0	0	0	0	0	0	0	0	0	0.9487	0	0	0	0	0	0	0	0	0
chrV	6668	A	T	0.6262	0	YEL075C	YEL074W	NONE	NONE	0	0	0	0	0	0	0	0	0	0	0	0	0	0	0	0	0	0	0	0	0.6262	0	0	0	0	0	0	0	0	0	0	0	0	0	0	0	0	0	0	0
chrV	6804	A	T	0.9858	1	YEL075C	YEL074W	NONE	NONE	0	0	0	0	0	0	0	0	0	0	0	0	0	0.9858	0	0	0	0	0	0	0	0	0	0	0	0	0	0	0	0	0	0	0	0	0	0	0	0	0	0
chrV	7779	G	C	10	1	YEL073C	YEL074W	NONE	NONE	0	0	0	0	0	0	0	0	0	0	0	0	0	0	0	0	0	0	0	0	0	0	0	0	0	0	0	0	0	0	0	0	0	0	0	0	0	0	0	0
chrV	9264	A	T	10	1	YEL073C	YEL074W	NONE	NONE	0	0	0	0	0	0	0	0	0	0	0	0	0	0	10	0	0	0	0	0	0	0	0	0	0	0	0	0	0	0	0	0	0	0	0	0	0	0	0	0
chrV	9792	G	T	0.9926	1	YEL073C	YEL074W	NONE	NONE	0	0	0	0	0	0	0	0	0	0	0	0	0	0	0	0	0	0	0	0	0	0	0	0	0	0	0	0	0	0	0	0	0	0	0	0	0	0	0	0
chrV	12399	T	A	10	1	YEL072W	NONE	NONE	NONE	0	0	0	0	0	0	0	0	0	0	0	0	0	0	0	0	0	0	0	0	0	0	0	0	0	0	0	0	0	0	0	0	0	0	0	0	0	0	10	0
chrV	20698	A	G	0.995	1	NONE	YEL069C	YEL070W	SYNONYMOUS_CODING	0	0	0	0	0	0	0	0	0	0	0	0	0	0	0	0	0	0	0	0	0	0	0	0	0	0	0	0.995	0	0	0	0.6389	0	0	0	0	0	0	0	0
chrV	23239	T	A	10	1	YEL069C	YEL070W	NONE	NONE	0	0	0	0	0	0	0	0	0	0	0	0	0	0	0	0	0	0	0	0	0	0	0	0	0	0	0	0	0	0	0	0	0	0	10	0	0	0	0	0
chrV	24272	T	A	10	1	YEL069C	YEL068C	NONE	NONE	0	0	0	0	0	0	0	0	0	0	0	0	0	0	0	0	0	0	0	0	0	0	0	0	0	0	0	0	0	0	0	0	0	0	0	0	0	0	0	0
chrV	30916	T	C	0.9613	1	YEL062W	YEL063C	YEL064C	SYNONYMOUS_CODING	0	0	0	0	0	0	0	0	0	0	0	0	0	0.9613	0	0	0	0	0	0	0	0	0	0	0	0	0	0	0	0	0	0	0	0	0	0	0	0	0	0
chrV	36571	G	A	0.9958	1	YEL063C	YEL062W	YEL061C	SYNONYMOUS_CODING	0	0	0	0	0	0	0	0	0	0	0	0	0	0	0	0	0	0	0	0	0.0108	0	0	0	0	0	0	0	0	0	0	0	0	0	0	0	0	0	0	0
chrV	37640	G	C	10	1	YEL063C	YEL062W	YEL061C	NON_SYNONYMOUS_CODING	0	0	0	0	0	0	0	0	0	0	0	0	0	0	0	0	0	0	0	0	0	0	0	0	0	0	0	0	0	0	0	0	0	0	0	0	0	0	0	0
chrV	51342	A	C	10	1	YEL053W-A	snR80	YEL055C	NON_SYNONYMOUS_CODING	0	0	0	0	0	0	0	0	0	0	0	0	0	0	0	0	0	0	0	0	0	0	0	0	0	0	0	0	0.0061	0	0	0	0	0	10	0	0	0	0	0
chrV	53910	G	C	0.9865	1	YEL054C	YEL053W-A	YEL053C	SYNONYMOUS_CODING	0	0	0	0	0	0	0	0	0	0	0	0	0	0	0	0	0	0	0	0	0	0	0	0	0	0	0.0045	0	0	0	0	0.0061	0	0.9865	0.0112	0	0	0	0	0
chrV	57079	G	T	0.9517	1	YEL053C	YEL050C	YEL052W	NON_SYNONYMOUS_CODING	0	0	0	0	0	0	0	0	0	0	0	0	0	0	0	0	0	0	0	0	0	0	0	0	0	0	0	0	0	0	0	0	0	0.004	0	0	0	0	0	0
chrV	61901	G	A	10	2	YEL050C	snR53	tG(GCC)E	EXON	0	0	0	0	0	0	0	0	0	0	0	0	0	0	0	0	0	0	0	0	0	0	0	0	0	0	0	0	0	0	0	0	0	0	0	0	0	0	0	0
chrV	68832	G	C	10	1	YEL046C	YEL045C	NONE	NONE	0	0	0	0	0	0	0	0	0	0	0	0	0	0	0	0	0	0	0	0	0	0	0	0	0	0	0	0	0	0	0	0	0	0	0	0	0	0	0	0
chrV	70015	A	G	10	1	YEL043W	NONE	YEL044W	NON_SYNONYMOUS_CODING	0	0	0	0	0	0	0	0	0	0	0	0	10	0.0458	0	0	0	0	0	0	0	0	0	0	0	0	0	0	0	0	0	0	0	0	0	0	0	0	0	0
chrV	73977	A	G	0.9939	1	YEL041W	YEL043W	YEL042W	SYNONYMOUS_CODING	0	0	0	0	0	0	0	0	0	0	0	0	0	0	0	0	0	0	0	0	0	0	0	0	0	0	0	0	0	0	0	0	0	0	0	0	0	0	0	0
chrV	75121	T	C	10	1	YEL041W	YEL043W	YEL042W	NON_SYNONYMOUS_CODING	0	0	0	10	0	0	0	0	0	0	0	0	0	0	0	0	0	0	0	0	0	0	0	0	0	0	0	0	0	0	0	0	0	0	0	0	0	0	0	0
chrV	83683	A	G	10	1	YEL037C	YEL035C	YEL036C	SYNONYMOUS_CODING	0	0	0	0	0	0	0	0	0	0	0	0	0	0	0	0	0	0	0	0	0	0	0.0084	0	0	0	0	0	0	0	0	0	0	0	0	0	0	0	0	0
chrV	85547	G	A	10	1	YEL035C	YEL034C-A	NONE	NONE	0	0	0	0	0	0	0	0	0	0	0	0	0.0058	0	0	0	0	0	0	0	0	0	0	0	0	0	0	0	0	0	0	0	0	0	0	0	0	0	0	0
chrV	85574	C	A	10	1	YEL035C	YEL034C-A	NONE	NONE	0	0	0	0	0	0	0	0	0	0	0	0	0	0	0	0	0	0.0058	0	0	0	0	0	0	0	0	0	0	0	0	0	0	0	0	0	0	0	0	0	0
chrV	85989	T	G	10	1	YEL033W	YEL032C-A	YEL034C-A	NON_SYNONYMOUS_CODING	0	0	0	0	0	0	0	0	0	0	0	0	0	0	0	0	0	0	0	0	0	0	0	0	0	0	0	0	0	0	0	0	0	0	0	0	0	0	0	0
chrV	97811	T	C	0.8773	1	YEL029C	YEL030W	NONE	NONE	0	0	0	0	0	0	0	0	0	0	0.0049	0	0	0	0	0	0	0	0	0	0	0	0	0	0	0	0	0.0049	0	0	0.8773	0	0	0	0	0	0	0	0	0
chrV	100231	A	G	0.9915	1	YEL027W	tM(CAU)E	NONE	NONE	0	0	0	0	0	0	0	0	0	0	0	0	0	0	0	0	0	0	0	0	0	0	0	0	0	0	0	0	0	0	0	0	0	0	0	0	0	0	0	0
chrV	104367	A	T	0.9936	1	YEL024W	YEL026W	YEL025C	NON_SYNONYMOUS_CODING	0	0	0	0	0	0	0	0	0	0	0	0	0	0	0	0	0	0	0	0	0	0	0	0	0	0	0	0	0	0.9936	0	0	0	0	0	0	0	0	0	0
chrV	108904	C	T	0.7662	1	YEL022W	YEL024W	YEL023C	NON_SYNONYMOUS_CODING	0	0	0	0	0	0	0	0	0	0	0	0	0	0	0	0	0	0	0	0	0	0	0	0	0	0	0	0	0	0	0	0	0	0	0	0	0	0	0.0057	0
chrV	122705	T	A	10	1	YEL018C-A	YEL017C-A	NONE	NONE	0	0	0	0	0	0	0	0	0	0	0	0	0	0	10	0	0	0	0	0	0	0	0	0	0	0	0	0	0	0	0	0	0	0	0	0	0	0	0	0
chrV	126059	C	A	0.9521	1	YEL015W	YEL017W	YEL016C	NON_SYNONYMOUS_CODING	0	0	0	0	0	0	0	0	0.0053	0	0	0	0	0	0	0	0	0	0	0	0	0	0.0068	0	0	0	0	0	0	0	0	0.0061	0	0	0	0	0	0	0	0
chrV	128880	C	T	10	1	YEL014C	YEL015W	YEL013W	NON_SYNONYMOUS_CODING	0	0	0	0	0	0	0	0	0	10	0	0	0	0	0	0	0	0	0	0	0	0	0	0	0	0	0	0	0	0	0	0	0	0	0	0	0	0	0	0
chrV	134330	T	A	10	1	YEL010W	tK(CUU)E1	YEL011W	NON_SYNONYMOUS_CODING	0	0	0	0	0	0	0	0	0	0	0	0	0	0	0	0	0	0	0	0	0	0	0	0	0	0	0	0	0	0	0	0	10	0	0	0	0	0	0	0.0134
chrV	138715	G	C	10	1	YEL008W	YEL009C	tR(UCU)E	EXON	0	0	0	0	0	0	0	0	0	0	0	0	0	0	0	0	0	0	0	0	0	0	0	0	0	0	0	0	0	0	0	0	0	0	0	0	0	0	0	0
chrV	142563	G	C	0.8108	1	YEL008C-A	YEL008W	YEL007W	NON_SYNONYMOUS_CODING	0	0	0	0	0	0	0	0	0	0	0	0	0	0	0	0	0	0	0	0	0	0	0	0	0	0	0	0	0	0	0	0	0	0	0	0	0	0	0	0
chrV	152054	T	A	0.9916	1	YEL001C	YEL003W	NONE	NONE	0	0	0	0.0089	0	0	0	0	0	0	0	0	0	0	0	0	0	0	0	0	0	0	0	0	0	0	0	0	0	0	0	0	0	0	0	0	0	0	0	0
chrV	160994	G	T	10	1	YER006W	YER004W	YER005W	NON_SYNONYMOUS_CODING	0	0	0	0	0	0	0	0	0	0	0	0	0	0	0	0	0	0	0	0	0	0	0	0	0.0054	0	0	0	0	0	0	0	0	0	0	0	0	0	0	0
chrV	165782	A	T	10	1	YER006C-A	YER007C-A	YER007W	NON_SYNONYMOUS_CODING	0	0	0	0	0	0	0	0	0	0	0	0	0	0	0	0	0	0	0	0	0	0	0	0	0	0	0	0	0	0	0	0	0	0	0	0	0	0	0	0
chrV	168701	T	C	0.9945	1	snR14	YER007W	YER008C	SYNONYMOUS_CODING	0	0	0	0	0	0	0	0	0	0	0	0	0	0	0	0	0	0	0	0	0	0	0	0.0054	0	0	0	0	0	0	0	0	0.9945	0	0	0	0	0	0	0.0066
chrV	176138	T	A	0.994	1	tE(UUC)E1	YER011W	NONE	NONE	0	0	0	0	0	0	0	0	0	0	0	0	0	0	0	0	0	0	0	0	0	0	0	0	0	0	0	0	0	0	0	0	0	0	0	0	0	0	0	0
chrV	180360	G	C	10	1	YER014W	YER012W	YER013W	NON_SYNONYMOUS_CODING	0	0	0	0	0	0	0	0	0	0	0	0	0	0	0	0	0	0	0	0	0	0	0	0	0	0	0	0	0	0	0	0	0	0	0	0	0	0	0	0
chrV	186301	G	A	10	1	YER014C-A	YER014W	YER015W	NON_SYNONYMOUS_CODING	0	0	0	0	0	0	0	0	0	0	0	0	0	0	0	10	0	0	0	0	0	0	0	0	0	0	0	0	0	0	0	0	0	0	0	0	0	0	0	0
chrV	190232	T	A	0.7285	1	YER019W	YER016W	YER017C	NON_SYNONYMOUS_CODING	0	0	0	0	0	0	0	0	0	0	0	0	0	0	0	0	0	0	0	0	0	0	0	0	0	0	0	0	0	0	0	0	0	0	0	0	0	0	0	0
chrV	198043	A	T	0.728	1	YER022W	YER020W	YER021W	NON_SYNONYMOUS_CODING	0	0	0	0	0	0	0	0	0	0	0	0	0	0	0	0	0	0	0	0	0	0	0	0	0	0	0	0	0	0	0	0	0	0	0	0	0	0	0	0
chrV	200778	C	A	0.9934	1	YER023W	YER023C-A	YER022W	NON_SYNONYMOUS_CODING	0	0	0	0	0	0	0	0	0	0	0	0	0	0	0	0	0	0	0	0	0	0	0	0	0	0	0	0	0	0	0	0	0	0	0.016	0	0	0	0	0
chrV	205093	C	T	0.9923	1	YER025W	YER024W	NONE	NONE	0	0	0	0	0	0	0	0	0	0	0	0	0	0	0	0	0	0.9923	0	0	0	0	0	0	0	0	0	0	0	0	0	0	0	0	0	0	0	0	0	0
chrV	206018	G	C	10	1	tH(GUG)E1	YER024W	YER025W	NON_SYNONYMOUS_CODING	0	0	0	0	0	0	0	0	0	0	0	0	0	0	0	0	0	0	0	0	0	0	0	0	0	0	0	0	0	0	0	0	0	0	0	0	0	0	0	0
chrV	210016	A	T	0.9957	1	YER026C	YER028C	YER027C	NON_SYNONYMOUS_CODING	0	0	0	0	0	0	0	0	0	0	0	0	0	0	0	0	0	0	0	0	0	0	0	0	0	0	0	0	0	0	0	0	0	0	0	0	0	0	0	0
chrV	219580	A	T	0.7621	1	YER034W	YER032W	YER033C	SYNONYMOUS_CODING	0	0	0	0	0	0	0	0	0	0	0	0	0	0	0	0	0	0	0	0	0	0	0	0	0	0	0	0	0	0.0058	0	0	0	0	0	0	0	0	0	0
chrV	224845	A	G	10	1	YER037W	YER035W	YER036C	SYNONYMOUS_CODING	0	0.009	0	0	0	0	0	0	0	0	0	0	0	0	0	0	0	0	0	0	0	0	0	0	0.0051	0	0	0	0	0	0	0	0	0	0	0	0	0	0	0
chrV	225273	G	T	10	1	YER036C	YER038C	NONE	NONE	0	0	0	0	0	0	0	0	0	0	0	0	0	0	0	0	0	0	0	0	0	0	0	0	0	0	0	0	0	0	0	0	0	0	0	0	0	0	0.007	0
chrV	226228	A	G	0.9852	1	YER036C	YER038C	YER037W	NON_SYNONYMOUS_CODING	0	0	0	0	0	0	0	0	0	0	0	0	0	0	0	0	0	0	0	0	0	0	0	0	0	0	0	0	0	0.9852	0	0	0	0	0	0	0	0	0	0
chrV	228586	A	T	0.9908	1	YER038C	YER039C-A	YER038W-A	NON_SYNONYMOUS_CODING	0	0	0	0	0	0	0	0	0	0	0	0	0	0	0	0	0	0	0	0	0	0	0	0	0	0	0	0	0	0	0	0	0	0	0	0	0	0	0	0
chrV	233751	G	C	0.9948	1	YER042W	YER040W	YER041W	NON_SYNONYMOUS_CODING	0	0	0	0	0	0	0	0	0	0	0	0	0	0	0	0	0	0	0	0	0	0	0	0	0	0	0	0	0	0	0	0	0	0	0	0.9948	0	0	0	0
chrV	238205	G	T	0.8444	1	YER044C	YER044C-A	NONE	NONE	0.0064	0	0	0	0	0	0	0	0	0.0073	0	0	0	0.8444	0.0066	0	0	0	0	0	0	0	0	0.011	0	0	0	0	0	0	0	0	0	0	0	0	0	0	0	0
chrV	246478	T	A	10	1	tQ(UUG)E1	YER048C	YER047C	NON_SYNONYMOUS_CODING	0	0	0	0	0	0	0	0	0	0	0	0	0	0	0	0	0	0	0	0	0	0	0	0	0	0	0	0	0	0	0	0	0	0	0	0	0	0	0	0
chrV	247893	A	G	0.8051	1	YER047C	YER046W-A	YER048C	SYNONYMOUS_CODING	0.0035	0	0	0	0	0	0	0	0	0	0	0	0	0	0	0	0	0	0	0	0	0	0	0	0	0	0	0	0	0	0	0	0	0	0	0	0	0	0	0
chrV	264171	C	G	0.994	1	YER054C	YER055C	NONE	NONE	0	0	0	0	0	0	0	0	0	0	0	0	0	0	0	0	0	0	0	0	0	0	0	0	0	0	0	0	0	0	0	0.0057	0	0	0	0	0	0	0	0
chrV	264676	G	C	10	1	YER054C	YER055C	NONE	NONE	0	0	0	0	0	0	0	0	0	0	0	0	0	0	0	0	0	0	0	0	0	0	0	0	0	0	0	0	0	0	0	0	0	0	0	0	0	0	0	0
chrV	270461	T	C	10	1	YER056C-A	YER057C	NONE	NONE	0	0	0	0	0	0	0	0	0	0	0	0	0	0	0	0	0	0	0	0	0	0	0	0	0	0	0	0	0	0	0	0	0	0	10	0	0	0	0	0
chrV	270463	A	C	10	1	YER056C-A	YER057C	NONE	NONE	0	0	0	0.0081	0	0	0	0	0	0	0	0	0	0	0	0	0	0	0	0	0	0	0	0	0	0	0	0	0	0	0	0	0	0	10	0	0	0	0	0
chrV	271081	G	T	10	1	YER058W	NONE	YER057C	NON_SYNONYMOUS_CODING	0	0	0	0	0	0	0	0	0	0	0	0	0	0	0	0	0	0	0	0	0	0	0	0	0	0	10	0	0.0144	0	0	0	0	0	0	0	0	0	0	0
chrV	275474	T	C	10	1	YER060W-A	YER059W	YER060W	SYNONYMOUS_CODING	0	0	0	0	0	0	0	0	0	0	0	0	0	0	0	0	0	0	0	0	0	0	0	0	0	0	0	0	0	0	0	0	0	0	0	0	0	0	0	0
chrV	276511	C	G	10	1	YER060W-A	YER060W	NONE	NONE	0	0	0	0	0	0	0	0	0	0	0	0	0	0	0	0	0	0	0	0	0	0	0	0	0	0	0	0	0	0	0	0	0	0	0	0	0	0	0	0
chrV	282980	G	T	0.9948	1	YER062C	YER063W	YER064C	NON_SYNONYMOUS_CODING	0	0	0	0	0	0	0	0	0	0.0047	0	0	0	0	0	0	0	0	0	0	0	0	0	0	0	0	0	0	0	0.006	0	0	0	0	0	0	0.0046	0	0	0
chrV	283673	G	T	10	1	YER062C	YER063W	YER064C	NON_SYNONYMOUS_CODING	0	0	0	0	0	0	0	0	0	0	0	0	0	0	0	0	0	0	0	0	0	0	0	0	0	0	0	0	0	0	0	0	0	0	0	0.0069	0	0	0	0
chrV	287301	G	C	0.9494	1	YER065C	tS(UGA)E	NONE	NONE	0	0	0	0	0	0	0	0.0061	0	0	0	0	0	0	0	0	0	0	0	0	0	0	0	0	0	0	0	0	0	0	0	0	0	0	0	0	0	0	0	0
chrV	287484	T	C	10	1	YER065C	tS(UGA)E	NONE	NONE	0	0	0	0	0	0	0	0	0	0	0.0053	0	0	0	0	0	0	0	0	0	0	0	0	0	0.0053	0	0	0	0	0	0	0	0	0	0	0	0	0	0	0
chrV	294203	A	G	10	1	YER069W	YER068C-A	YER068W	NON_SYNONYMOUS_CODING	0	0	0	0	0	0	0	0	0	0	0	0	0	0	0	0	0	0	0	0	0	0	0.0061	0	0	0	0	0	0	0	0	0	0	0	0	0	0	0	0	0
chrV	296574	T	C	0.9808	1	YER068C-A	YER068W	YER069W	SYNONYMOUS_CODING	0	0	0	0	0	0	0	0	0	0	0	0	0	0	0	0	0	0	0	0	0	0	0	0	0	0	0	0	0	0	0	0	0	0	0	0	0	0	0	0
chrV	303450	T	A	10	1	YER073W	YER072W	NONE	NONE	0	0	0	0	0	0	0	0	0	0	0	0	0	0	0	0	0	0	0	0	0	0	0	0	0	0	0	0	0	0	0	0	0	0	0	0	0	0	0	0
chrV	306269	G	C	10	1	YER074W	YER073W	NONE	NONE	0	0	0	0	0	0	0	0	0	0	0	0	0	0	0	0	0	0	0	0	0	0	0	0	0	0	0	0	0	0	0	0	0	0	0	0	0	0	0	0
chrV	306862	C	T	10	1	YER074W-A	YER073W	YER074W	SYNONYMOUS_CODING	0	0	0	0	0	0	0	0	0	0	0	0	0	0	0	0	0	0	0	0	0	0	0	0.0068	0	0	0	0	0	0	0	0	0	0	0	0	0	0	0	0
chrV	315069	C	A	0.9935	1	YER076C	YER076W-A	YER077C	NON_SYNONYMOUS_CODING	0	0	0	0	0	0	0	0	0	0	0	0	0	0	0	0	0	0	0	0	0	0	0	0	0	0	0	0	0	0	0	0	0	0.004	0	0	0	0	0	0
chrV	318287	A	G	0.9898	1	YER078W-A	YER079C-A	YER078C	NON_SYNONYMOUS_CODING	0	0	0	0	0	0	0	0	0	0	0	0	0	0	0	0	0	0	0	0	0	0	0	0	0	0	0	0	0	0.9898	0	0	0	0	0	0	0	0	0	0
chrV	319379	C	A	10	1	YER080W	YER079C-A	YER079W	NON_SYNONYMOUS_CODING	0	0	0	0	0	0	0	0	0	0	0	0	0	0	0	0	0	0.0056	0	0	0	0	0	0	0	0	0	0	0	10	0	0	0	0	0	0	0	0	0	0
chrV	320264	G	A	0.9915	1	YER079C-A	YER079W	YER080W	SYNONYMOUS_CODING	0	0	0	0	0	0	0	0	0	0	0	0	0	0	0	0	0	0	0	0	0	0	0	0	0	0	0	0	0	0	0	0	0	0	0	0	0	0	0	0
chrV	320944	T	A	10	1	YER079C-A	YER079W	YER080W	NON_SYNONYMOUS_CODING	0	0	0	0	0	0	0	0	0	0	0	0	0	0	10	0	0	0	0	0	0	0	0	0	0	0	0	0	0	0	0	0	0	0	0	0	0	0	0	0
chrV	322172	T	A	0.9944	1	SRG1	YER080W	NONE	NONE	0	0	0	0	0	0	0	0	0	0	0	0	0	0	0	0	0	0	0	0	0	0	0	0	0	0	0	0	0	0	0	0	0	0	0	0	0	0	0	0
chrV	327217	C	A	10	1	YER083C	YER085C	YER084W	NON_SYNONYMOUS_CODING	0	0	0.0071	0	0	0	0	0	0	0	0	0	0	0	0	0.0061	0	0	0	0	0	0	0	0	0	0	0.0067	0	0	0.0097	0	0	0	0	0	0	0	0	0	0
chrV	333436	A	G	10	1	YER087C-B	YER087W	YER088C	SYNONYMOUS_CODING	0	0	0	0	0	0	0	0	0	0	0	0	0	0	0	0	0	0	0	0	0	0	0	0	0	0	0	0	0	0	0	0	0	0	0	0	0	0	0	0
chrV	335571	T	C	10	1	YER088W-B	YER088C-A	NONE	NONE	0	0	0	0	0	0	0	0	0	0	0	0	0	0	0	0	0	0	0	0	0	0	0	0	0	0	0	0	0	0	0	0	0	0	0	0	0	0	0	0
chrV	336731	T	C	10	1	YER088C-A	YER088W-B	YER089C	SYNONYMOUS_CODING	0	0	0	0	0	0	10	0	0	0	0	0	0	0	0	0	0	0	0	0	0	0	0	0	0	0	0	0	0	0	0	0	0	0	0	0	0	0	0	0
chrV	346177	G	T	10	1	YER091C-A	YER093C-A	YER093C	NON_SYNONYMOUS_CODING	0	0	0	0	0	0	0	0	0	0	0	0	0	0	0	0	0	0	0	0	0	0	0	0	0	0	0	0	0	0.0079	0	0	0	0	0	0	0	0	0	0
chrV	348641	G	T	0.992	1	YER093C-A	YER094C	NONE	NONE	0	0	0.0137	0	0	0	0	0	0	0	0	0.011	0	0	0	0	0	0	0	0	0	0	0	0	0	0	0	0	0	0	0	0	0	0	0	0	0.0056	0	0	0
chrV	353703	C	A	10	1	tE(UUC)E2	YER096W	NONE	NONE	0	0	0	0	0	0	0	0.0058	10	0	0	0	0	0	0	0	0	0	0	0	0	0	0	0	0	0	0	0.0052	0	0	0	0.0052	0	0	0	0	0	0	0	0
chrV	355651	G	A	10	1	YER100W	YER097W	YER098W	NON_SYNONYMOUS_CODING	0	0	0	0	0	0	0	0	0	0	10	0	0	0	0	0	0	0	0	0	0	0	0	0	0	0	0	0	0	0	0	0	0	0	0	0	0	0	0	0
chrV	357416	A	G	10	2	YER100W	YER099C	YER098W	NON_SYNONYMOUS_CODING	0	0	0	0	0	0	0	0	0	0	0	0	0	0	0	0	0	0	0	0	0	0	0	0	0	0.0068	0	0	0	0	0	0	0	0	0	0	0	0	0	0
chrV	361189	G	C	0.9946	1	YER102W	YER100W	YER101C	NON_SYNONYMOUS_CODING	0	0	0	0	0	0	0	0	0.9946	0	0	0	0	0	0	0	0	0	0	0	0	0	0	0	0	0	0	0	0	0	0	0	0	0.004	0	0	0	0	0	0
chrV	362450	G	A	10	1	YER102W	YER100W	NONE	NONE	0	0	0	0	0	0	0	0	0	0	0	0	0	0	0	0	0	0	0	0	0	0	0	0	0	0	0	0	0	0	0	0	0	10	0	0	0	0	0	0
chrV	362971	C	T	0.6619	0	YER102W	YER100W	NONE	NONE	0	0	0	0	0	0	0	0	0	0	0	0	0	0	0	0	0	0	0	0	0	0	0	0	0	0	0	0	0	0	0	0.6619	0	0	0	0	0	0	0	0
chrV	365329	A	G	10	1	YER104W	YER102W	YER103W	NON_SYNONYMOUS_CODING	0	0	0	0	0	10	0	0	0	0	0	0	0	0.0064	0	0	0	0	0	0	0	0	0	0	0	0	0	0	0	0	0	0	0	0	0	0	0	0	0	0
chrV	373733	T	C	10	1	YER107W-A	YER106W	YER107C	NON_SYNONYMOUS_CODING	0	0	0	0	0	0	0	0	0	0	0	0	0	0	0	0	0	0	0	0	0	0	0	0	0	0	0	0	0	0	0	0	0	0	0	0	0	0	0	0
chrV	375428	T	A	0.9963	1	YER107C	YER107W-A	YER109C	NON_SYNONYMOUS_CODING	0	0	0	0	0	0	0	0	0	0	0	0	0	0	0	0	0	0	0	0	0	0	0	0	0	0	0	0	0	0	0	0	0	0	0	0	0	0	0	0
chrV	390160	C	T	0.9843	1	YER113C	YER114C	NONE	NONE	0	0	0	0	0	0	0	0	0	0	0	0	0	0	0	0	0	0	0	0	0	0	0	0	0	0	0	0	0	0	0	0	0	0	0	0	0	0	0	0
chrV	391342	T	A	0.9918	1	YER113C	YER115C	YER114C	NON_SYNONYMOUS_CODING	0	0	0	0	0	0	0	0	0	0	0	0	0	0	0	0	0	0	0	0	0	0	0	0	0	0	0	0	0	0	0	0	0	0	0	0	0	0	0.9918	0
chrV	392230	T	C	10	1	YER113C	YER115C	YER114C	SYNONYMOUS_CODING	0	0	0	0	0	0	0	0	0	0.0066	0	0	0	0	0	0.0056	0	0	0	0	0	0	0	0	0	0	0	0	0	0	0	0	0	0	0	0	0	0	0	0
chrV	393151	C	T	10	1	YER113C	YER115C	YER114C	SYNONYMOUS_CODING	0	0	0	0	0	0	0	0	0	0	0	0	0	0	0	0	0	0	0	0	0	0	0	0	0	0	0	0	0	0	0	0	0	0	0	0	0	0	0	0
chrV	395757	T	C	10	1	YER115C	YER118C	YER116C	NON_SYNONYMOUS_CODING	0	0	0	0	0	0	0	0	0	0	0	0	0	0	0	0	0	0	0	0.0143	0	10	0	0	0	0	0	0	0	0	0	0	0	0	0	0	0	0	0	0
chrV	395907	C	T	0.9949	1	YER117W	YER118C	YER116C	NON_SYNONYMOUS_CODING	0	0	0	0	0	0	0	0	0	0	0	0	0	0	0	0	0	0	0	0	0	0	0	0	0	0	0	0	0	0	0	0	0	0	0	0	0	0	0	0
chrV	396869	C	A	10	1	YER116C	YER118C	YER117W	INTRON	0	0	0	0	0	0	0	0	0	0	0	0	0	0	0	0	0.0061	0	0	0	0	0	0	0	0	0	10	0	0	0	0	0	0	0	0	0	0	0	0	0
chrV	399565	G	T	10	1	YER118C	YER119C-A	YER119C	NON_SYNONYMOUS_CODING	0	0	0	0	0	0	0	0	0	0	0	0	0	0	0	0	0	0	0	0	10	0	0	0	0	0	0.0046	0	0	0	0	0	0	0	0	0.0058	0	0	0	0
chrV	401798	C	A	0.9943	1	YER119C-A	YER122C	YER120W	STOP_GAINED	0	0	0	0	0	0	0	0	0	0	0	0	0	0	0	0	0	0	0	0	0	0	0	0	0	0	0.9943	0	0	0	0	0	0	0	0.009	0	0.0111	0	0	0
chrV	404469	A	G	10	1	YER122C	YER121W	NONE	NONE	0	0	0	0	0	0	0	0	0	0	0	0	0	0	0	0	0	0	0	0	0	0	0	0	0	0	0	0	0	0	0	0	0	0	0	0	0	0	10	0.0104
chrV	406301	A	C	0.9872	1	YER122C	YER124C	YER123W	NON_SYNONYMOUS_CODING	0	0	0	0	0	0	0	0	0	0	0	0	0	0	0	0	0	0	0	0	0	0	0	0	0	0	0	0	0	0	0	0	0	0	0.9872	0	0	0	0	0
chrV	424668	C	T	0.9661	1	snR4	YER131W	NONE	NONE	0	0	0	0	0	0	0	0	0.0128	0	0	0	0	0	0	0	0	0	0	0	0	0	0.0056	0	0	0.0066	0	0	0	0	0.9661	0	0	0	0	0	0	0	0	0
chrV	431339	C	A	0.9722	1	snR52	tH(GUG)E2	NONE	NONE	0	0	0	0	0	0	0.0076	0	0	0	0	0	0	0	0	0	0	0	0	0	0	0	0	0	0	0	0	0.007	0	0	0	0	0	0.9722	0	0	0	0	0	0
chrV	435658	G	A	0.985	1	tH(GUG)E2	tK(CUU)E2	NONE	NONE	0.0053	0	0	0	0	0	0	0.985	0	0	0	0	0	0	0	0	0	0	0	0	0	0	0	0	0	0	0	0	0	0	0	0	0	0	0	0	0	0	0	0
chrV	435762	C	T	0.6024	0	tH(GUG)E2	YER134C	tK(CUU)E2	EXON	0	0	0	0	0	0	0	0	0	0	0	0	0	0	0	0	0	0	0	0	0.6024	0	0	0	0	0	0	0	0	0	0	0	0	0	0	0	0	0	0	0
chrV	435767	A	T	10	1	tH(GUG)E2	YER134C	tK(CUU)E2	EXON	0	0	0	0	0	0	0	0	0	0	0	0	0	0	0	0	0	0	10	0	0	0	0	0	0	0	0	0	0	0	0	0	0	0	0	0	0	0	0	0
chrV	440894	T	A	10	1	YER137W-A	YER137C	YER136W	NON_SYNONYMOUS_CODING	0	10	0	0	0	0	0	0	0	0	0	0	0	0	0	0	0	0	0	0	0	0	0	0	0	0	0	0	0	0	0	0	0	0	0	0	0	0	0	0
chrV	442302	G	C	0.9813	1	YER137C	YER137W-A	SCR1	EXON	0	0	0	0	0	0	0	0	0	0	0	0	0	0	0	0	0	0	0	0	0	0	0	0	0	0	0	0	0	0	0	0	0	0	0	0	0	0	0	0
chrV	443270	C	T	0.991	1	YER137C	YER138C	tI(AAU)E1	EXON	0	0	0	0	0	0	0	0	0	0	0	0	0	0	0	0	0	0	0	0	0	0	0	0	0	0	0	0	0	0	0	0	0.0163	0	0	0	0	0	0	0.991
chrV	443409	A	G	0.9167	1	tI(AAU)E1	YER138C	NONE	NONE	0	0	0	0	0	0	0.9167	0	0	0	0	0	0	0	0	0	0	0	0	0	0	0.0064	0	0	0	0	0	0	0	0	0	0	0	0	0	0	0	0	0	0
chrV	443410	A	T	0.873	1	tI(AAU)E1	YER138C	NONE	NONE	0	0	0	0	0	0	0.873	0	0	0	0	0	0	0	0	0	0	0	0	0	0	0.0065	0	0	0	0	0	0	0	0	0	0	0	0	0	0	0	0	0	0
chrV	443412	T	G	0.8702	1	tI(AAU)E1	YER138C	NONE	NONE	0	0	0	0	0	0	0.8702	0	0	0	0	0	0	0	0	0	0	0	0	0	0	0.0065	0	0	0	0	0	0	0	0	0	0	0	0	0	0	0	0	0	0
chrV	458151	G	A	10	1	YER142C	YER143W	YER144C	SYNONYMOUS_CODING	0	0	0	0	0	0	0	0	0	0	0	0	0	0	0	0	0	0	0	0	0	0	0	0	0	0	0	0	0	0	0	0	0	0	0	0	0	0	0	0
chrV	458485	T	C	10	1	YER142C	YER143W	YER144C	SYNONYMOUS_CODING	0	0	0	0	0	0	0	0	0	0	0	0	0	0	0	0	0	0	0	0	0	0	0	0	0.0051	0	0	0	0	0	0	0	0	0	0	0	0	0	0	0
chrV	491384	G	A	10	1	YER158W-A	YER159C	NONE	NONE	0	0	0	0	0	0	10	0	0	0	0	0	0	0	0	0.0062	0	0	0	0	0	0	0	0	0	0	0	0	0	0	0	0	0	0	0	0	0	0	0	0
chrV	504516	A	G	10	1	YER163C	NONE	NONE	NONE	0	0	0	0	0	0	0	0	0	0	0	0	0	0	0	0	0	0	0	0	0	0	0	0	0	0	0	0	0	0	0	0	0	0	0	0	0	0	0	0
chrV	504732	T	C	10	1	YER164W	NONE	NONE	NONE	0	0	0	0	0	0	0	0	0	0	0	0	0	0	0	0	0	0	0	0	0	0	0	0	0	0	0	0	0	0	0	0	0.0053	0	0	0	0	0	0	0
chrV	511570	C	G	0.9931	1	YER166W	YER165C-A	YER165W	NON_SYNONYMOUS_CODING	0	0	0	0	0	0	0	0	0	0	0	0	0	0	0	0	0	0	0	0	0	0	0	0	0	0	0	0	0	0	0	0	0	0	0	0	0	0	0	0
chrV	511883	A	G	0.9945	1	YER166W	YER165C-A	YER165W	NON_SYNONYMOUS_CODING	0	0	0	0	0	0	0	0	0.9945	0	0	0	0	0	0	0	0.0069	0	0	0	0	0	0	0	0	0	0	0	0	0	0	0	0	0	0	0	0	0	0	0
chrV	513445	G	T	0.5882	0	YER165C-A	YER165W	YER166W	NON_SYNONYMOUS_CODING	0	0	0	0	0	0	0	0	0	0	0	0	0	0	0	0	0	0	0	0	0	0	0	0	0	0	0	0	0	0	0	0	0	0	0	0	0	0	0	0
chrV	516619	A	C	0.9903	1	YER167W	YER168C	YER166W	NON_SYNONYMOUS_CODING	0	0	0	0	0	0	0	0	0	0	0.0049	0	0	0	0	0	0	0	0	0	0	0	0	0	0	0	0	0	0	0	0	0	0	0	0	0	0	0	0	0
chrV	516667	T	C	0.9794	1	YER167W	YER168C	YER166W	NON_SYNONYMOUS_CODING	0	0	0	0	0	0	0	0	0	0	0	0	0	0	0	0	0	0	0	0	0	0	0	0	0	0	0	0	0	0	0	0	0	0	0	0	0	0	0	0
chrV	517699	A	T	10	1	YER167W	YER166W	NONE	NONE	0	0	0	0	0	0	0	0	0	0	0	0	0	0	0	0	0	0	0	0	0	0	0	0	0	0	0	0	0	0	0	0	0	0	0	0	0	0	0	0
chrV	520239	G	C	10	1	YER169W	YER168C	YER167W	NON_SYNONYMOUS_CODING	0	0	0	0	0	0	0	0	0	0	0	0	0	0	0	0	0	0	0	0	10	0	0	0	0	0	0	0	0	0	0	0	0	0	0	0	0	0	0	0
chrV	520638	C	T	10	1	YER169W	YER168C	YER167W	NON_SYNONYMOUS_CODING	0	0	0	0	0	0	0	0	0	0	0	0	0	0	0	0	0	0	0	0	0	0	0	0	0	0	0	0	0	0	0	0	0	0	0	0	0	0	0	0
chrV	523712	A	T	0.994	1	YER168C	YER167W	YER169W	STOP_GAINED	0	0	0	0	0	0	0	0.994	0	0	0	0	0.0053	0	0	0	0	0	0	0	0	0	0	0	0	0	0	0	0	0	0	0	0	0	0	0	0	0	0	0
chrV	540469	G	C	10	1	YER175C	YER173W	NONE	NONE	0	0	0	0	0	0	0	0	0	0	0	10	0	0	0	0	0	0	0	0	0	0	0	0	0	0	0	0	0	0	0.0048	0.0043	0	0	0	0	0	0	0.0065	0
chrV	543878	C	A	10	1	YER177W	YER175W-A	YER176W	NON_SYNONYMOUS_CODING	0	0	0	0	0	0	0	0	0	0	0	0	0	0	0	0	0	0	0	0	0	0	0	0	0	0	0	0.0053	0	0	0	0	0	0	0	0	10	0	0	0
chrV	545490	C	T	10	1	YER177W	YER176W	NONE	NONE	0.0046	0	0	0	0	0	0	0	0	0	0	0	0	0	0	0	0	0	0	0	0	0	0	0	0	0	0	0	0	0	0	0	0	0	0	0	0	10	0	0
chrV	548810	G	A	10	1	YER182W	YER178W	YER179W	SYNONYMOUS_CODING	0	0	0	0	0	0	0	0	0	0	0	0	0	0	0	0	0	0	0	0	0	0	0	0	0	0	0	0	0	0	0	0	0	0	0	0	0	10	0	0
chrV	550813	C	T	0.9948	1	YER180C	YER180C-A	NONE	NONE	0	0	0	0	0	0	0	0	0	0	0	0	0	0	0	0	0	0	0	0	0	0	0	0	0	0	0	0	0	0	0	0	0	0	0	0	0	0.9948	0	0
chrV	551388	T	A	0.9931	1	tI(AAU)E2	YER181C	NONE	NONE	0	0	0	0	0	0	0	0	0	0	0	0	0	0	0	0	0	0	0	0	0	0	0	0	0	0	0	0	0	0	0	0	0.9931	0	0	0	0	0	0	0
chrV	553305	C	T	10	1	YER181C	YER183C	NONE	NONE	0	0	0	0	0	0	0	0	0	0	0	0	0	0	0	0	0	0	0	0	0	0	0	0	0	0	0	0	0	0	0	0	0	0	0	0	0	10	0	0
chrV	555483	A	G	10	1	YER183C	YER184C	NONE	NONE	0	0	0	0	0	0	0	0	0	0	0	0	0	0	0	0	0	0	0	0	0	0	0	0	0	0	0	0	0	0	0	0	0	0	0	0	0	10	0	0
chrV	559553	C	A	0.9608	1	YER184C	YER186C	YER185W	SYNONYMOUS_CODING	0	0	0	0	0	0	0	0	0	0	0	0	0	0	0	0	0	0	0	0	0	0	0	0	0	0	0	0	0	0	0.9608	0	0	0	0	0	0	0	0	0
chrV	568649	T	C	10	1	YER189W	YER188C-A	YER188W	SYNONYMOUS_CODING	0.0137	0	0	0	0	0	0	0	0	0	0	10	0	0	0	0	0	0	0	0	0	0	0	0	0	0	0	0	0	0	0	0	0	0	0	0	0	0	0	0
chrV	569671	T	A	10	1	YER189W	YER188W	YER188C-A	NON_SYNONYMOUS_CODING	0	0	0	0	0	0	0	0	0	0	0	0	0	0	0	0	0	0	0	0	0	0	0	0	0	0	0	0	0	0	0	0	0	0	0	0	0	0	0	0
chrV	570151	G	A	0.8102	1	YER188C-A	YER188W	NONE	NONE	0	0	0	0	0	0	0	0	0	0	0	0.8102	0	0	0	0	0	0	0	0	0	0	0	0	0	0	0	0	0	0	0	0	0	0	0	0	0	0	0	0
chrV	570610	G	T	0.5241	0	YER189W	YER188W	NONE	NONE	0	0.0099	0	0	0	0	0	0	0	0	0	0	0	0	0	0	0	0	0	0	0	0	0	0	0	0	0	0	0	0	0	0	0	0	0	0	0	0	0	0
chrVI	1158	T	C	0.5448	0	YFL063W	YFL066C	YFL067W	NON_SYNONYMOUS_CODING	0	0	0	0	0	0	0.0024	0	0	0	0	0	0	0	0.5448	0	0	0	0	0	0	0	0	0	0	0	0	0	0	0	0	0	0	0	0	0	0	0	0	0.0042
chrVI	1536	T	C	0.4371	0	YFL063W	YFL067W	YFL066C	SYNONYMOUS_CODING	0	0	0	0	0	0	0	0	0	0	0	0	0	0	0	0	0	0	0.0099	0	0	0	0	0	0	0	0	0	0	0	0	0	0	0	0	0	0	0	0	0
chrVI	5478	C	A	10	1	YFL062W	YFL067W	YFL063W	STOP_GAINED	0	0	0	0	0	0	0	0	0	0	0	0	0	0	0	0	0	0	0.0089	0	0	0	0	10	0	0	0	0	0	0	0	0	0	0	0	0.0058	0	0	0	0
chrVI	6864	A	C	10	1	YFL061W	YFL063W	YFL062W	NON_SYNONYMOUS_CODING	0	0	0	0	0	0	0	0	0	0	0	0	0	0	0	0	0	0	0	0	0	0	0	0	0	0	0	0	0	0	0	0	0	0	0	0	0	10	0	0
chrVI	8382	C	A	0.4135	0	YFL061W	YFL062W	NONE	NONE	0	0	0	0	0	0	0	0	0	0	0	0	0	0	0	0	0	0	0	0	0	0	0	0	0	0	0	0	0	0	0	0	0	0	0	0	0.0062	0	0	0
chrVI	8796	C	T	0.9819	1	YFL061W	YFL062W	NONE	NONE	0	0	0	0	0	0	0	0	0	0	0	0	0	0	0	0.9819	0	0	0	0	0	0	0	0	0	0	0	0	0	0	0	0	0	0	0	0	0	0	0	0
chrVI	9457	T	A	10	1	YFL061W	YFL060C	NONE	NONE	0	0	0	0	0	0	0	0	0	0	0	0	0	0	0	0	0	0	0	0	0	0	0	0	0	0	0	0	0	0	0	0	0	0	0	0	0	0	0	0
chrVI	13682	G	T	10	1	YFL060C	YFL057C	YFL058W	NON_SYNONYMOUS_CODING	0	0	0	0	0	0	0.0053	0	0	0	0	0	0	0	0	0	0	0	0	0	0	0	10	0	0	0	0	0	0	0	0	0	0	0	0	0	0	0	0	0
chrVI	17967	T	C	10	1	YFL056C	YFL054C	YFL055W	NON_SYNONYMOUS_CODING	0	0	0	0	0	0	0	0	0	0	0	0	0	0	0	0	0	0	0	0	0	0	0	0	0	0	0	0	0	0	0	0	0	0	0	0	0	0	0	0
chrVI	22866	A	G	10	1	YFL054C	YFL055W	NONE	NONE	0	10	0	0	0	0	0	0	0	0	0	0	0	0	0	0	0	0	0	0	0	0	0	0	0	0	0	0	0	0	0.0662	0	0	0	0	0	0	0	0	0
chrVI	30221	G	T	10	1	NONE	YFL052W	YFL051C	NON_SYNONYMOUS_CODING	0	0	0	0	0	0	0	0	0	0	0	0	0	0	0	0	0	0	0	0	0	0	0	0	0	0	0	0	0	0.0063	0	0	0	0	0	0	0.0043	0	0	0
chrVI	41524	T	A	0.9921	1	YFL046W	YFL045C	YFL047W	STOP_GAINED	0	0	0	0	0	0	0	0	0	0	0	0	0	0	0	0	0	0	0	0	0	0	0	0	0	0	0	0	0	0	0	0	0	0	0	0	0	0	0	0
chrVI	46592	C	A	10	1	YFL044C	YFL046W	YFL042C	NON_SYNONYMOUS_CODING	0	0	0	0	0.0058	0	0	0	0	0	0	0	0	0	0.0049	0	0	0	0	0	0	0	0	0	0	0.0057	0	0	0	0	0	0	0	0	0	0	0	0.0073	0	0
chrVI	47016	A	C	10	1	YFL044C	YFL046W	YFL042C	NON_SYNONYMOUS_CODING	0	0	0	0	0	0	0	0	0	0	0	0	0	0	0	0	0	0	0.0054	0	0	0	0	0	10	0	0	0	0	0	0	0	0.005	0	0	0	0	0	0	0
chrVI	48438	C	A	10	1	YFL041W-A	YFL039C	NONE	NONE	0	0	0	0	0	0	0	0.0115	0	0	0	0	0	0	0	0	0	0	0	0	0	0	0.0161	0	0	0	0	0	0	0	0	0	0	0	0	0	0	0	0	0
chrVI	54303	C	A	10	1	YFL037W	YFL038C	YFL039C	NON_SYNONYMOUS_CODING	0	0	0	0	0	0	0	0	0	0	0	0	0	0	0	0	0	0	0	0	0	0	0	0	0	0	0	0	0	0	0	0	0	0	0	0	0	0.0076	0	0
chrVI	55228	C	A	10	1	YFL039C	YFL038C	NONE	NONE	0	10	0	0	0	0	0	0	0	0	0.01	0	0	0	0	0	0	0	0	0	0	0	0	0	0	0	0	0	0	0	0	0	0	0	0	0	0	0	0	0
chrVI	56473	C	T	10	1	YFL038C	RUF21	YFL037W	SYNONYMOUS_CODING	0	0	0	0	0	0	0	0	0	0	0	0	0	0	0	0	0	0	0	0	0	0	0	0	0	0	0	0	0	0	0	0	0	0	0	0	0	0	0	0
chrVI	56555	A	G	0.8591	1	YFL038C	RUF21	YFL037W	NON_SYNONYMOUS_CODING	0	0	0	0	0	0	0	0	0	0	0.0096	0	0	0	0	0	0	0	0	0	0	0	0	0	0	0	0	0	0	0	0	0	0	0	0	0	0	0	0	0
chrVI	65144	T	C	10	1	YFL034C-A	YFL036W	NONE	NONE	0	0	0	0	0	0	0	0	0	0	0	0	0	0	0	0	0	10	0	0	0	0	0	0	0	0	0.006	0	0	0	0	0	0	0	0	0	0	0	0	0
chrVI	65160	C	T	10	1	YFL034C-A	YFL036W	NONE	NONE	0	0	0	0	0	0	0	0	0	0	0	0	0	0	10	0	0	0	0	0	0	0	0	0	0	0	0	0	0	0	0	0	0	0	0	0	0	0	0	0
chrVI	65531	G	C	0.9937	1	YFL034C-A	YFL036W	YFL034W	NON_SYNONYMOUS_CODING	0	0	0	0	0	0	0	0	0	0	0	0	0	0	0	0	0	0	0	0	0	0	0.9937	0	0	0	0	0	0	0	0	0	0	0	0	0	0	0	0	0
chrVI	67842	C	T	10	1	YFL034C-A	YFL033C	YFL034W	NON_SYNONYMOUS_CODING	0	0	0	0	0	0	0	0	0	0	0	0	0	0	0	0	0	0	0	0	0	0	0	0	0	0	0	0	0	0	0	0	0	0	0	0	0	0	0	0
chrVI	72083	G	T	10	1	YFL032W	YFL034W	YFL033C	NON_SYNONYMOUS_CODING	0	0	0	0	0.0047	0	0	0	0	0	10	0	0	0	0	0	0	0	0	0	0	0	0	0	0	0	0	0	0	0	0	0.0095	0	0	0	0	0.0042	0	0	0
chrVI	72920	T	A	10	1	YFL032W	YFL031C-A	YFL033C	NON_SYNONYMOUS_CODING	0	0	0	0	0	0	0	0	0	0	0	0	0.0082	0	0	10	0	0	0	0	0	0	0	0	0	0	0	0	0	0	0	0.0075	0	0	0	0	0	0	0	0
chrVI	83804	G	A	0.9952	1	YFL027C	YFL025C	YFL026W	NON_SYNONYMOUS_CODING	0	0	0	0	0	0	0	0	0	0	0	0	0	0	0	0	0	0	0	0	0	0	0	0	0	0	0	0	0	0	0	0	0	0	0	0	0	0	0	0
chrVI	85870	T	A	10	1	YFL027C	YFL024C	YFL025C	NON_SYNONYMOUS_CODING	0	0	0	0	0	0	0	0	0	10	0	0	0	0	0	0	0	0	0	0	0	0	0	0	0	0	0	0	0	0	0	0	0	0	0	0	0	0	0	0
chrVI	88970	T	C	10	1	YFL025C	YFL022C	YFL024C	SYNONYMOUS_CODING	0	10	0	0	0	0	0	0	0	0	0	0	0	0	0	0	0	0	0	0	0	0	0	0	0	0	0	0	0	0	0	0	0	0	0	0	0	0	0	0
chrVI	90893	A	G	10	1	YFL023W	YFL022C	NONE	NONE	0	0	0	0	0	0	0	0	0	0	0	0	0	0	0	0	0	0	0	0	0	0	0	0	0	0	0	0	0	0	0	0	0	0	0	0	0	0	0	0
chrVI	96114	G	A	10	1	YFL022C	YFL023W	YFL021C-A	NON_SYNONYMOUS_CODING	0	0	0	0	0	0	0	0	0	0	0	0	0	0	10	0	0	0	0	0	0	0	0	0	0	0	0	0	0	0	0	0	0	0	0	0	0	0	0	0
chrVI	98590	G	A	10	1	YFL021C-A	YFL020C	NONE	NONE	0	0	0	0	0	0	0	0	0	0	0	0	0	0	0	0	0	0	0	0	0	0	0	0	0	0	0	0	0	0	0	0	0	0	0	0	0	0	0	0
chrVI	101372	G	C	10	1	YFL019C	YFL018C	tP(UGG)F	EXON	0	0	0	0	0	0	0	0	0	0	0	0	0	0	0	0	0	0	0	0	0	0	0	0	0	0	0	0	0	0	0	0	0	0	0	0	0	0	0	0
chrVI	111230	C	G	10	1	YFL011W	YFL012W	NONE	NONE	0	0	0	0	0	0	0	0	0	0	0	0	10	0.0366	0	0	0	0	0	0	0	0	0	0	0	0	0	0	0	0	0	0	0	0	0	0	0	0	0.0047	0
chrVI	113734	T	C	0.9816	1	YFL010W-A	YFL010C	YFL011W	NON_SYNONYMOUS_CODING	0	0	0	0	0	0	0	0	0	0	0	0	0	0	0	0	0	0	0	0	0	0	0	0	0	0	0	0	0	0	0	0	0	0	0	0	0	0	0	0
chrVI	117656	A	G	10	1	YFL008W	YFL010W-A	YFL009W	SYNONYMOUS_CODING	0	0	0	0	0	0	0	0	0	0	0	0	0	0	0	0	0	10	0	0	0	0	0	0	0	0	0	0	0	0	0	0	0	0	0	0	0	0	0	0
chrVI	125530	A	G	10	1	YFL005W	YFL008W	YFL007W	NON_SYNONYMOUS_CODING	0	0	0	10	0	0	0	0	0.0048	0	0	0	0	0	0	0	0	0	0	0	0	0	0	0	0	0	0	0	0	0	0	0	0	0	0	0	0	0	0	0
chrVI	134223	A	G	0.9877	1	RUF20	YFL003C	YFL004W	NON_SYNONYMOUS_CODING	0	0	0	0	0	0	0	0	0	0	0	0	0	0	0	0	0	0	0	0	0	0	0	0	0	0	0	0	0	0	0	0	0	0	0	0	0	0	0	0.0062
chrVI	149213	A	C	0.9936	1	YFR002W	YFL001W	YFR001W	NON_SYNONYMOUS_CODING	0	0	0	0	0	0	0	0	0	0	0	0	0	0	0	0	0	0	0.9936	0	0	0	0.0072	0	0	0	0	0	0	0	0	0	0	0	0	0	0	0	0	0
chrVI	149216	G	A	0.9941	1	YFR002W	YFL001W	YFR001W	NON_SYNONYMOUS_CODING	0	0	0	0	0	0	0	0	0	0	0	0	0	0	0	0	0	0	0.9941	0	0	0	0	0	0	0	0	0	0	0	0	0	0	0	0	0	0	0	0	0
chrVI	157991	G	C	10	1	YFR007W	YFR006W	tF(GAA)F	EXON	0	0	0	0	0	0	0.0087	0	0	0	0	0	0	0	0	0	0	0	0	0	0	0	0	0	0	0	0	0	0	0	0	0	0	0.0049	0	0	0	0	0	0
chrVI	161189	G	A	0.9892	1	tG(GCC)F1	YFR007W	YFR008W	NON_SYNONYMOUS_CODING	0	0.0108	0	0	0	0	0	0	0	0	0	0	0	0	0	0	0	0	0	0.008	0	0	0	0	0	0	0	0	0	0	0	0	0	0.0034	0	0	0	0	0	0
chrVI	162211	C	G	10	1	tG(GCC)F1	YFR008W	NONE	NONE	0	0	0	0	0	0	0	0	0	0	0	0	0	0	0	0	0	0	0	0	0	0	0	0	0	0	0	0	0	0	0	0	0	0	0	0	10	0	0	0
chrVI	163435	C	A	10	1	YFR009W-A	tG(GCC)F1	YFR009W	NON_SYNONYMOUS_CODING	0	0	0	0	0	0	0	0	0	0	0	0	0	0	0	0	0	0	0	0	0	0	0	0	0	0	0	0	0	0	0	0	0.0043	0	0	0	0	0	0	0
chrVI	163439	G	T	10	1	YFR009W-A	tG(GCC)F1	YFR009W	STOP_GAINED	0	0	0	0	0	0	0	0	0	0	0	0	0	0	0	0	0	0	0	0	0	0	0	0	0	0	0	0	0	0	0	0	0	0	0	0	0	0	0	0
chrVI	181012	G	A	0.9927	1	YFR016C	YFR017C	tG(GCC)F2	EXON	0	0	0	0	0	0	0	0	0	0	0	0	0	0	0	0	0	0	0	0	0	0	0	0	0	0	0	0	0	0	0	0	0	0	0	0	0.9927	0	0	0
chrVI	181039	A	T	0.9892	1	tG(GCC)F2	YFR017C	NONE	NONE	0	0	0	0	0	0	0	0	0.9892	0	0	0	0	0	0	0	0	0	0	0	0	0	0	0	0	0	0	0	0	0	0	0	0	0	0	0	0	0	0	0
chrVI	181063	A	T	10	1	tG(GCC)F2	YFR017C	NONE	NONE	0	0	0	0	0	0	0	0	0	0	0	0	0	0	0	0	0	0	0	0	0	0	0	0	0	0	0	0	0	0	0	0	0	0	0	0	0	0	0	0
chrVI	182980	C	A	10	1	YFR017C	YFR018C	NONE	NONE	0	0	0	0	0	0	0	0.0135	0	0	0	0	0	0	0	0	0	0	0	0	0	0	0	0	0	0	0	0	0	0	0	0	0	0	0	0.0092	0	0	0	0
chrVI	182983	C	T	0.959	1	YFR017C	YFR018C	NONE	NONE	0	0	0	0	0	0	0	0	0	0	0	0	0	0	0	0	0	0	0	0	0	0	0	0	0	0	0	0.0101	0	0	0	0	0	0	0	0	0	0	0	0
chrVI	189179	A	T	0.9944	1	YFR020W	tS(GCU)F	YFR019W	NON_SYNONYMOUS_CODING	0	0	0	0	0	0	0	0	0	0	0	0	0	0	0	0	0	0	0	0	0	0	0	0	0	0	0	0	0	0	0	0	0	0	0	0	0	0	0	0
chrVI	194519	A	C	10	1	YFR021W	YFR020W	NONE	NONE	0	0	0	0	0	0	0	0	0	0	0	0	0	0	0	0	0	0	0	0	0	0	0	0	0	0	0	0	0	0	0	0	0	0	10	0	0	0	0	0
chrVI	208719	G	A	10	1	YFR029W	YFR027W	YFR028C	SYNONYMOUS_CODING	0	0	0	0	0	0	0	0	0	0	0	0	0	0	0	0	0	0	0	0	0	0	0	0	0	0	0	0	0	0	0	0	0	0	0	0	0	0	0	0
chrVI	214603	A	G	0.9695	1	tY(GUA)F2	YFR029W	YFR030W	NON_SYNONYMOUS_CODING	0	0	0	0	0	0	0	0	0	0	0	0	0	0	0	0	0	0	0	0	0	0	0	0	0	0	0	0	0	0	0	0	0	0	0	0	0	0	0	0
chrVI	223660	T	A	10	1	YFR032C-A	YFR032C-B	NONE	NONE	0	0	0	0	0	0	0	0	0	0	0	0	10	0.0462	0	0	0	0	0	0	0	0	0	0	0	0	0	0	0	0	0	0	0	0	0	0	0	0	0	0
chrVI	225820	A	G	0.9936	1	YFR034W-A	YFR035C	YFR034C	NON_SYNONYMOUS_CODING	0	0	0	0	0	0	0	0	0	0	0	0	0	0	0	0	0	0	0	0	0	0.9936	0	0	0	0	0	0	0	0	0	0	0	0.0045	0	0	0	0	0	0
chrVI	226853	A	T	10	1	YFR036W	YFR034W-A	NONE	NONE	0	0	0	0	0	0	0	0	0	0	0	0	0	0	0	0	0	0	0	0	0	0	0	0	0	0	0	0	0	0	0	0	0	0	0	0	0	0	0	0
chrVI	230172	C	T	10	1	YFR037C	YFR039C	YFR038W	NON_SYNONYMOUS_CODING	0	0	0	0	0	10	0	0	0	0	0	0	0	0	0	0	0	0	0	0	0	0	0	0	0	0	0	0	0	0	0	0	0	0	0	0	0	0	0	0
chrVI	230927	T	C	10	1	YFR037C	YFR039C	YFR038W	NON_SYNONYMOUS_CODING	0	0	0	0	0	0	0	0	0	0	0	0	0	0.0048	0	0	0	0	0	0	0	0	0	0	0	0	0	0	0	10	0	0.0051	0	0	0	0	0	0	0	0
chrVI	232665	G	A	10	1	YFR040W	YFR038W	YFR039C	SYNONYMOUS_CODING	0	0	0	0	0	0	0	0	0	0	0	0	0	0	0	0	0	0	0	0	0	0	0	0	0	0	0	0	0	0	0	0	0	0	0	0	0	0	0	0
chrVI	234686	A	T	0.9953	1	YFR039C	YFR041C	YFR040W	NON_SYNONYMOUS_CODING	0	0	0	0	0	0	0	0	0	0	0	0	0	0	0	0	0	0	0	0	0	0	0	0	0	0	0	0	0	0	0	0	0	0	0	0	0	0	0	0
chrVI	246076	T	A	0.9461	1	YFR048W	YFR050C	NONE	NONE	0	0	0	0	0	0	0	0	0	0	0	0	0	0.9461	0	0	0	0	0	0	0	0	0	0	0	0	0	0	0	0	0	0	0	0	0	0	0	0	0	0
chrVI	249022	G	T	10	1	YFR052W	YFR050C	NONE	NONE	0	0	0	0	0	0	0	0	0.0069	0	0	0	0	0	0	0	0	0	0	0	0	0	0.0065	0	0	0	0	0	0	0	0	0	0	0	0	0	0.0046	0	0	0
chrVI	252665	T	C	10	1	YFR051C	YFR052C-A	YFR052W	SYNONYMOUS_CODING	0	0	0	0	0	0	0	0	0	0	10	0	0	0	0	0	0	0	0	0	0	0	0	0	0	0	0	0	0	0	0	0	0	0	0	0	0	0	0	0
chrVI	253861	A	T	10	1	YFR052C-A	YFR052W	YFR053C	SYNONYMOUS_CODING	0	0	0	0	0	0	0	0	0	0	0	0	0	0	0	10	0	0	0	0	0	0	0	0	0	0	0	0	0	0	0	0	0	0	0	0	0	0	0	0
chrVI	259212	A	T	10	1	YFR053C	YFR056C	YFR054C	NON_SYNONYMOUS_CODING	0	10	0	0	0	0	0	0	0	0	0	0	0	0	0	0	0	0	0	0	0	0	0	0	0	0	0	0	0	0	0.0345	0	0	0	0	0	0	0	0	0
chrVI	267243	T	C	0.9608	1	YFR057W	YFR055W	NONE	NONE	0	0	0	0	0	0	0	0	0	0	0	0	0	0	0	0	0	0	0	0	0	0	0	0	0	0	0	0	0	0	0.9608	0	0	0	0	0	0	0	0	0
chrVII	16391	T	C	0.9892	1	YGL257C	YGL256W	NONE	NONE	0	0	0	0	0	0	0	0	0	0	0	0	0	0	0	0	0	0	0	0	0	0	0	0	0	0	0	0	0	0	0	0	0	0	0	0	0	0.9892	0	0
chrVII	28374	G	C	10	1	YGL252C	YGL253W	YGL251C	STOP_GAINED	0	0	0	0	0	0	0	0	0	0	0	0	0	0	0	10	0	0	0	0	0	0	0	0	0	0	0	0	0	0	0	0	0	0	0	0	0	0	0	0
chrVII	30516	A	T	0.9495	1	YGL250W	NONE	YGL251C	NON_SYNONYMOUS_CODING	0	0	0	0	0	0	0	0	0	0	0	0	0	0.9495	0	0	0	0	0	0	0	0	0	0	0	0	0	0	0	0	0	0	0	0	0	0	0	0	0	0
chrVII	31149	C	A	10	1	YGL250W	NONE	YGL251C	SYNONYMOUS_CODING	0	0	0	0	0	0	0	0	0	0	0	0	0	0	0	0	0	0	0	0	0	0	0	0	0	0	0	0	0.0076	0	0	0	0	0	0	0	0	10	0	0
chrVII	37421	C	A	10	1	YGL245W	YGL246C	YGL247W	NON_SYNONYMOUS_CODING	0	0	0	0	0	0	0	0	0	0	0	0	0	0	0	0	0	0	0	0	0	0	0	0	0	0	0.005	0	0	0	0	0.0067	0	0.0055	0	0	0	0	0	0
chrVII	38032	T	C	0.995	1	YGL245W	YGL247W	YGL246C	NON_SYNONYMOUS_CODING	0	0	0	0	0	0	0	0	0	0	0	0	0	0	0	0	0	0	0	0	0	0	0	0	0	0	0	0	0	0	0	0	0	0	0	0	0	0	0	0
chrVII	38638	A	T	10	1	YGL245W	YGL247W	YGL246C	NON_SYNONYMOUS_CODING	0	0	0	0	0	0	0	0	0	0	0	0	0	0	0	0	0	0	0	0	0	0	0	0	0	0	0	0	0	0	0	0	0	0	0	0	0	10	0	0
chrVII	39728	T	C	0.948	1	YGL246C	YGL247W	YGL245W	SYNONYMOUS_CODING	0	0	0	0	0	0	0	0	0	0	0	0	0	0	0	0	0	0	0	0	0	0	0	0	0	0	0	0	0	0	0	0	0	0.0038	0	0	0	0	0	0
chrVII	41490	C	T	10	1	YGL244W	YGL245W	NONE	NONE	0	0	0	0	0	0	0	0	0	0	0	0	0	0	0	0	0	0	0	0	0	0	0	0	0	0	0	0	0	0	0	0	0	0	0	0	0	0	0	0
chrVII	48012	C	G	0.8202	1	YGL240W	YGL239C	YGL241W	STOP_GAINED	0	0	0	0	0	0	0	0	0	0	0	0	0	0	0	0	0	0	0	0	0	0	0	0	0	0	0	0	0	0	0	0	0	0	0	0	0	0	0	0
chrVII	66522	C	T	0.6634	0	YGL228W	YGL232W	YGL229C	SYNONYMOUS_CODING	0	0	0	0	0	0	0	0	0	0	0	0	0	0	0	0	0	0	0	0	0	0	0	0	0	0	0	0	0	0	0	0	0	0	0	0	0	0	0	0
chrVII	68940	A	G	10	1	YGL227W	YGL226C-A	YGL228W	NON_SYNONYMOUS_CODING	0	0	0	0	0	0	0	0	0	0	10	0	0	0	0	0	0	0	0	0	0	0	0	0	0	0	0	0	0	0	0	0	0	0	0	0	0	0	0	0
chrVII	73883	C	T	0.9888	1	YGL226C-A	YGL226W	tV(AAC)G3	EXON	0	0	0	0	0	0	0	0	0	0	0	0	0	0	0	0	0	0	0	0	0	0	0	0	0	0	0	0	0	0	0	0	0	0	0	0	0	0	0	0
chrVII	78715	C	A	10	9	YGL220W	YGL223C	YGL224C	NON_SYNONYMOUS_CODING	0	0	0	0	10	0	0	0	0	0	0	0	0	0	0	0	0	0	0	0	0	0	0	0	10	0.9933	10	0.9953	10	10	0.9608	10	0	0	0	0	0	0	0	0.0058
chrVII	81871	C	G	0.984	1	YGL220W	YGL219C	YGL221C	NON_SYNONYMOUS_CODING	0	0	0	0	0	0	0	0	0	0	0	0	0	0	0	0	0	0	0	0	0	0	0	0	0	0	0	0	0	0	0	0	0	0	0	0	0	0.984	0	0
chrVII	86690	A	G	0.9876	1	YGL215W	YGL218W	YGL216W	NON_SYNONYMOUS_CODING	0	0	0	0	0	0	0	0	0	0	0	0	0	0	0	0	0	0	0	0	0	0	0	0	0	0	0	0	0	0	0	0	0	0	0.9876	0	0	0	0	0
chrVII	89644	A	T	0.8431	1	YGL214W	YGL215W	NONE	NONE	0	0	0	0	0	0	0	0	0	0	0	0.8431	0	0	0	0	0	0	0	0	0	0	0	0	0	0	0	0	0	0	0	0	0	0	0	0	0	0	0	0
chrVII	97324	G	C	10	1	YGL208W	YGL209W	NONE	NONE	0	0	0	0	0	0	0	0	0	0	0	0	0	0	0	0	0	0	0	0	0	0	0	0	0	0	0	0	0	0	0	0	0	0	0	0	0	0	0	0
chrVII	98869	C	T	10	1	YGL207W	YGL208W	NONE	NONE	0	0	0	0	0	0	0	0	0	0	0	0	0	0	0	0	0	0	0	0	0	0	0	0	0	0	0	0	0	0	0	0	0	0	0	0	0	0	0	10
chrVII	102276	G	A	10	1	NONE	YGL207W	NONE	NONE	0	0	0	0	0	0	0	0	0	0	0	0	0	0	0	0	0	0	0	0	0	0	0	0	0	0	0	0.0051	0	0	0	0	0	0	0	0	0	0	0	0
chrVII	104034	A	G	10	49	YGL205W	YGL207W	YGL206C	SYNONYMOUS_CODING	0	0	0	0	0	0	0	0	0	0	0	0	0	0	0	0	0	0	0	0	10	0	0	0	0	0	0	0	0	0	0	0	0	0.0044	0	0	0	0	0	0
chrVII	104410	C	G	10	1	YGL205W	YGL207W	YGL206C	NON_SYNONYMOUS_CODING	0	0	0	0	0	0	0	0	0	0	0	0	0	0	0	0	0	0	0	0	0	0	0	10	0	0	0	0	0	0	0	0	0	0	0	0	0	0	0	0
chrVII	112027	G	T	10	1	YGL204C	YGL203C	NONE	NONE	0	0	0	0	0	0	0	0	0	0	0	0	0	0	0	0.0046	0	0	0	0	0	0	0	0	0	0	0	0	0	0	0	0	0	0	0	0	0	0	0	0
chrVII	114324	C	G	10	1	tK(UUU)G1	YGL201C	YGL203C	NON_SYNONYMOUS_CODING	0	0	0	0	0	0	0	0	0	0	0	0	0	0	0	0	0	0	0	0.0104	0	0	0	10	0	0	0	0	0	0	0	0	0	0	0	0	0	0	0	0
chrVII	123503	T	A	10	1	YGL198W	YGL199C	NONE	NONE	0	0	0	0	0	0	0	0	0	0	0	0	0	0	0	0	0	0	0	0	0	0	0	0	0	0	0	0	0	0	0	0	0	0	0	0	0	0	0	0
chrVII	126484	A	G	0.9937	1	YGL199C	YGL198W	YGL197W	SYNONYMOUS_CODING	0	0	0	0	0	0	0	0	0	0	0	0	0	0	0	0	0	0	0	0	0	0	0	0	0	0	0	0	0	0	0	0	0	0	0	0	0	0	0.0068	0
chrVII	129283	T	C	10	1	YGL196W	YGL197W	NONE	NONE	0.0048	0	0	10	0	0	0	0	0	0	0	0	0	0	0.0052	0	0	0	0	0	0	0	0	0	0	0	0	0	0	0	0	0	0	0	0	0	0	0	0	0
chrVII	130453	C	T	10	1	YGL195W	YGL197W	YGL196W	NON_SYNONYMOUS_CODING	0	0	0	10	0	0	0	0	0	0	0	0	0	0	0	0	0	0	0	0	0	0	0	0	0	0	0	0	0	0	0	0	0	0	0	0	0	0	0	0
chrVII	133219	C	A	10	1	NONE	YGL196W	YGL195W	SYNONYMOUS_CODING	0	0	0	0	0	0	0	0	0	0	0	0	0	0	0	0	0	0	0	0	0	0	0	0	0	0	0	0	0	0	0	0	0	0	0	0	0	0	0	0
chrVII	134397	C	T	0.992	1	NONE	YGL196W	YGL195W	NON_SYNONYMOUS_CODING	0	0	0	0	0	0	0	0	0	0	0	0	0	0	0	0	0	0	0	0	0	0	0	0	0	0	0	0	0	0	0	0	0	0	0	0	0	0	0	0
chrVII	137287	A	T	0.9943	1	YGL192W	YGL194C-A	YGL195W	NON_SYNONYMOUS_CODING	0	0	0	0	0	0	0	0	0	0	0	0	0	0	0	0	0	0	0	0	0	0	0	0.9943	0	0	0	0	0	0	0	0	0	0	0	0	0	0	0	0
chrVII	139361	G	C	10	1	YGL192W	YGL194C-A	YGL195W	NON_SYNONYMOUS_CODING	0	0	0	0	0	0	0	0	0	0	0	0	0	0	0	0	0	0	0	0	0	0	0	0	0	0	0	0	0	0	0	0	0	0	0	0	0	0	0	0
chrVII	141745	T	C	0.9019	1	YGL194C	YGL193C	NONE	NONE	0	0	0	0	0	0	0	0	0	0	0	0	0	0.0046	0	0	0	0	0	0	0	0	0	0	0	0	0	0	0	0	0	0	0	0	0	0	0	0	0	0
chrVII	144389	C	A	10	1	YGL191W	YGL192W	NONE	NONE	0	10	0	0	0	0	0	0	0	0	0	0	0	0	0	0	0	0	0	0	0	0	0	0	0	0	0	0.0068	0	0	0.0382	0	0	0	0.0159	0	0	0	0	0
chrVII	144485	A	T	0.9892	1	YGL191W	YGL192W	NONE	NONE	0	0	0	0	0	0	0	0	0	0	0	0	0	0	0	0	0	0	0	0	0	0	0	0	0	0	0	0	0	0	0	0	0	0	0	0	0	0	0	0
chrVII	149033	G	A	10	1	YGL188C-A	YGL188C	NONE	NONE	0	0	0	0	0	0	0	0	0	0	0.0061	0	0	0	0	0	0	0	0	0	0	0	0	0	0	0	0	0	0	0	0	0	0	0	0	0	0	0	0	0
chrVII	166742	C	T	0.9731	1	YGL178W	YGL180W	NONE	NONE	0	0	0	0	0	0	0	0	0	0	0	0	0	0	0	0	0	0	0	0	0	0	0	0	0	0	0	0	0	0	0	0	0	0	0	0	0	0	0	0
chrVII	168341	C	A	10	1	YGL179C	YGL177W	YGL178W	NON_SYNONYMOUS_CODING	0	0	0	0	10	0	0	0	0	0	0	0	0	0	0	0	0	0	0.0076	0	0	0	0	0	0	0	0	0	0	0	0	0	0	0	0	0	0	0	0	0
chrVII	168668	G	A	10	1	YGL179C	YGL177W	YGL178W	NON_SYNONYMOUS_CODING	0	0	0.015	0	10	0	0	0.0068	0	0	0	0	0.0074	0	0	0	0	0	0	0	0	0	0	0	0	0	0	0	0	0.0088	0	0	0	0	0	0	0	0	0	0
chrVII	171559	T	A	0.9569	1	YGL174W	YGL178W	YGL176C	NON_SYNONYMOUS_CODING	0	0	0	0	0	0	0	0	0	0	0	0	0	0	0	0.0042	0	0	0	0	0	0	0	0	0.0057	0	0	0	0	0	0.9569	0	0	0	0	0	0	0	0	0
chrVII	176908	T	C	10	1	YGL175C	YGL174W	YGL173C	NON_SYNONYMOUS_CODING	0	0	0	0	0	0	0	0	0	0	0	0	0	0	0	0	0	0	0	0	0	0	0	0	0	0	0	0	0	0	0	0	0	0	0	0	0	0	0	0
chrVII	177944	G	C	10	1	YGL172W	YGL174W	YGL173C	NON_SYNONYMOUS_CODING	0	0	0	0	0	0	0	0	0	0	0	0	0	0	0	0	0	0	0	0	0	0	0	0	0	0	0	0	0	0	0	0	0	0	0	0	0	0	0	0
chrVII	179113	C	T	10	1	YGL172W	YGL174W	YGL173C	NON_SYNONYMOUS_CODING	0	0	0	0	0	0	0	0	0	0	0	0	0	0	0	0	0	0	0	0	0	0	0	0	0	0	0	0	0	0	0	0	0	0	0	0	0	0	0	0
chrVII	179270	C	T	10	2	YGL172W	YGL174W	YGL173C	NON_SYNONYMOUS_CODING	0	0	0	0	0	0	0	0	0	0	0	0	0	0	0	0	0	0	0	0	0	0	0	0	0	0	0	0	0	0	0	0	0	0	0	0	0	0	0	0
chrVII	185094	A	G	0.9801	1	YGL169W	tK(CUU)G2	YGL170C	NON_SYNONYMOUS_CODING	0	0	0	0	0	0	0	0	0	0	0	0	0	0.9801	0	0	0	0	0	0	0	0	0	0	0	0	0	0	0	0	0	0	0	0	0	0	0	0	0	0
chrVII	185259	T	A	0.9928	1	YGL169W	tK(CUU)G2	YGL170C	STOP_GAINED	0	0	0	0	0	0	0	0	0	0	0	0	0	0	0	0	0	0.9928	0	0	0	0	0	0	0	0	0	0	0	0	0	0	0	0	0	0	0	0	0	0
chrVII	187824	G	C	10	1	tK(CUU)G2	YGL168W	YGL167C	NON_SYNONYMOUS_CODING	0	0	0	0.0135	0	0	0	0	0	0	0	0	0	0	0	0	0	0	0	0	0	0	0	0	0	0	0	0	0	0	0	0	0	0	0	0	0	0	0	0
chrVII	192428	C	A	10	1	YGL165C	YGL166W	YGL164C	NON_SYNONYMOUS_CODING	0	0	0	0	0	0	0	0	0	0	0	0	0	0	0	0	0	10	0	0	0	0	0	0	0.0056	0	0	0	0	0	0	0	0	0	0	0	0	0	0	0.0064
chrVII	192433	C	A	10	1	YGL165C	YGL166W	YGL164C	NON_SYNONYMOUS_CODING	0	0	0	0	0.005	0	0	0	0	0	0	0	0	0	0	0	0	10	0	0	0	0	0	0	0	0	0	0	0	0	0	0	0	0	0	0	0	0	0	0
chrVII	193097	C	A	0.9949	1	YGL165C	YGL163C	YGL164C	SYNONYMOUS_CODING	0	0	0	0	0	0.9949	0	0	0	0	0	0	0	0	0	0	0	0	0	0	0	0	0	0	0	0	0	0	0	0	0	0	0	0	0	0	0	0	0	0
chrVII	193435	G	T	10	1	YGL164C	YGL163C	NONE	NONE	0	0	0	0	0	0	0	0	0	0	0.0073	0	0	0	0	0	0	0	0	0	0	0	0	0	0	0	0.0053	0	0	0	0	0	0	0	0	0	0	0	0	0
chrVII	207972	C	A	10	1	YGL157W	tL(CAA)G1	YGL158W	NON_SYNONYMOUS_CODING	0	0	0	0	0	0	0	0	10	0	0	0	0	0	0	0	0	0	0	0	0	0	0	0	0	0	0	0	0	0	0	0.0063	0	0	0	0	0	0	0	0
chrVII	214132	A	G	0.9946	1	YGL153W	YGL156W	YGL155W	NON_SYNONYMOUS_CODING	0	0	0	0	0	0	0	0	0	0	0	0	0	0	0.9946	0	0	0	0	0	0	0	0	0	0	0	0	0	0	0	0	0	0	0	0	0	0	0	0	0
chrVII	214549	A	C	0.9971	1	YGL153W	YGL154C	YGL155W	NON_SYNONYMOUS_CODING	0	0	0	0	0	0	0	0	0	0	0	0.0087	0	0	0	0	0	0	0	0	0	0	0	0	0	0	0	0	0	0	0	0	0	0	0	0	0	0	0	0
chrVII	218102	A	G	10	1	YGL152C	YGL153W	YGL151W	NON_SYNONYMOUS_CODING	0	0	0	0	0	0	0	0	0	0	0	0	0	0	0	0	0	0	0	0	0	0	0	0	0	0	0	0	0	0	0	0	0	0	0	0	0	0	0	0
chrVII	220597	A	G	10	1	YGL152C	YGL150C	YGL151W	SYNONYMOUS_CODING	0	0	0	0	0	0	0	0	0.0045	0	0	0	0	0	0	0	0	0	0	0	0	0	0	0	0	0	0	0	0	0	0	0	0	0	0	0.0047	0	0	0	0
chrVII	237015	G	T	0.99	1	YGL143C	YGL140C	YGL142C	NON_SYNONYMOUS_CODING	0	0	0	0	0	0	0	0	0	0	0	0	0	0	0	0	0	0	0	0	0	0	0	0	0	0	0.0043	0	0	0	0	0	0	0	0	0	0	0	0	0
chrVII	239645	A	G	10	1	YGL142C	YGL140C	YGL141W	NON_SYNONYMOUS_CODING	0	0	0	0	0	0	0	0	0	0	0	0	0	0	0	0	0	0	0	0	0	0	0	0	10	0	0	0	0	0	0	0	0	0	0	0	0	0	0	0
chrVII	240913	C	A	10	1	YGL142C	YGL140C	YGL141W	SYNONYMOUS_CODING	0	0	0	0	0	0	0	0	0	0	0	0	0	0	0	0	0	0	0	0	0	0	0	0	0	0	0.0053	0	0	0	0	0	0	0	0	0	0.0066	0	0	0
chrVII	242396	T	A	0.9932	1	YGL139W	YGL141W	YGL140C	SYNONYMOUS_CODING	0	0	0	0	0	0	0	0	0	0	0	0	0	0	0	0	0	0	0	0	0	0	0	0	0	0	0	0	0	0	0	0	0	0	0	0	0	0	0.007	0
chrVII	245505	G	C	0.9742	1	YGL139W	YGL138C	NONE	NONE	0	0	0	0	0	0	0	0	0	0	0	0	0	0	0	0	0	0	0	0	0	0	0	0	0	0	0	0	0	0.0082	0.9742	0	0	0	0	0	0	0	0	0
chrVII	247727	G	C	0.9441	1	YGL137W	YGL138C	YGL139W	SYNONYMOUS_CODING	0	0	0	0	0	0	0	0	0	0	0	0	0	0	0	0	0	0	0	0	0	0	0	0	0	0	0	0	0	0	0.9441	0	0	0	0	0	0	0	0	0
chrVII	249812	C	T	10	1	YGL137W	YGL139W	NONE	NONE	0	0	0	0	0	0	0	0	0	0	10	0	0	0	0	0	0	0	0	0	0	0	0	0	0	0	0	0	0	0	0	0	0	0	0	0	0	0	0	0
chrVII	250172	C	T	0.9948	1	YGL138C	YGL139W	YGL137W	SYNONYMOUS_CODING	0	0	0	0	0	0	0	0	0	0	0	0	0	0	0	0	0	0	0	0	0	0	0	0	0	0	0	0	0	0	0	0	0	0	0	0	0	0	0	0
chrVII	250651	A	T	0.8814	1	YGL138C	YGL136C	YGL137W	NON_SYNONYMOUS_CODING	0	0	0	0	0	0	0	0	0	0	0	0	0	0	0	0	0.0114	0	0	0	0	0	0	0	0	0	0	0	0	0	0	0	0	0	0	0	0	0	0	0
chrVII	254751	G	C	10	1	YGL136C	YGL137W	YGL135W	NON_SYNONYMOUS_CODING	0	0	0	0	0	0	10	0	0.005	0	0	0	0	0	0	0	0	0	0	0	0	0	0	0	0	0	0	0	0	0	0	0	0	0	0	0	0	0	0	0
chrVII	259566	C	A	10	1	YGL132W	YGL131C	YGL133W	NON_SYNONYMOUS_CODING	0	0	0	0	0	0	0	0	0	0	0	0	0	0	0	0	0	0	0	0	0	0	0	0	0	0	0	0	0	0	0	0	0	0	0	0	0	0	0	0
chrVII	264901	A	G	0.9948	1	YGL130W	YGL129C	YGL131C	NON_SYNONYMOUS_CODING	0	0	0	0	0	0	0	0	0	0	0	0	0	0	0	0	0	0	0	0	0	0	0	0	0	0	0	0	0	0	0	0	0	0	0	0	0	0	0	0
chrVII	275382	C	A	0.9873	1	YGL123W	YGL125W	YGL124C	NON_SYNONYMOUS_CODING	0	0	0	0	0	0	0	0	0	0	0	0	0	0	0	0	0	0	0	0	0	0.9873	0	0	0	0	0	0	0	0	0	0	0	0	0	0	0	0	0	0
chrVII	278048	T	A	10	1	YGL123C-A	YGL122C	YGL123W	SYNONYMOUS_CODING	0	0	0	0	0	0	0	0	0	0	0	0	0	0	0	0	0	0	0	0	0	0	0	0	0	0	0	0	0	0	0	0	0	0	0	0	0	0	0	0
chrVII	287409	G	A	10	1	YGL117W	YGL118C	tW(CCA)G1	INTRON	0	0	0	0	10	0	0	0	0	0.007	0	0	0	0	0	0	0	0	0	0	0	0	0	0	0	0	0	0	0	0	0	0	0	0	0	0	0	0	0	0
chrVII	289134	A	T	10	1	YGL118C	YGL119W	YGL117W	NON_SYNONYMOUS_CODING	0	0	0	0	0	0	0	0	0	0	0	0	0	0	0	0	0	0	0	0	0	0	10	0	0	0	0	0	0	0	0	0	0	0	0	0	0	0	0	0
chrVII	290272	C	T	10	1	YGL115W	YGL117W	YGL116W	NON_SYNONYMOUS_CODING	0	0	0	0	0	0	0	0	0	0	0	0.0076	0	0	0	0	0	0.0083	0	0	0	0	0	0	0	0	0	0	0	0	0	0	0	0	0	0	0	0.0067	0	0
chrVII	294208	A	G	0.9939	1	YGL113W	YGL115W	YGL114W	NON_SYNONYMOUS_CODING	0	0	0	0	0	0	0	0	0	0	0	0	0	0	0	0	0	0	0	0	0	0	0	0	0	0	0	0	0	0	0	0	0	0	0	0	0.006	0	0	0
chrVII	301106	T	C	10	1	YGL112C	YGL110C	YGL111W	SYNONYMOUS_CODING	0	0	0	0	0	0	0	0	0	0	0	0	0	0	0	0	0	0	0	0	0	0	0	0	0	0	0	0	0	0	0	0	0	0	0	0	0	0	0	0
chrVII	306708	C	A	0.9554	1	YGL107C	YGL104C	YGL106W	NON_SYNONYMOUS_CODING	0	0	0	0	0	0	0	0	0	0	0	0	0	0	0	0	0	0	0	0	0	0	0	0	0	0	0	0	0	0	0.9554	0	0	0	0	0	0	0	0	0
chrVII	308186	C	A	10	1	YGL107C	YGL104C	YGL105W	SYNONYMOUS_CODING	0	0	0	0	0	0	0	0	0	0	0	0	0	0	0	0	0	0	0	0	0	0	0	0	0	0	0	0	0	0	0	0	0	0	0	0	0	0	0	0
chrVII	311052	A	G	10	1	YGL104C	YGL102C	YGL103W	INTRON	0.0041	0	0	0	0	0	10	0	0	0	0	0.0112	0	0	0	0	0	0	0	0	0	0	0	0	0	0	0	0	0	0	0	0	0	0	0	0	0	0	0	0
chrVII	319722	A	G	0.5448	0	tH(GUG)G2	YGL098W	NONE	NONE	0	0	0	0	0	0	0	0	0	0	0	0	0.5448	0.0085	0	0	0	0	0	0	0	0	0	0	0	0	0	0	0	0	0	0	0.0029	0	0	0	0	0	0	0
chrVII	319829	A	G	10	1	YGL097W	YGL098W	tH(GUG)G2	EXON	0.0064	0	0	0	10	0	0	0	0	0	0	0	0	0	0	0	0	0	0	0	0	0	0	0	0	0	0	0	0	0	0	0	0	0	0	0	0	0	0	0
chrVII	321649	A	C	0.9837	1	YGL097W	tH(GUG)G2	NONE	NONE	0	0	0	0	0	0	0	0	0	0	0	0	0	0.9837	0	0	0	0	0	0	0	0	0	0	0.0078	0	0	0	0	0	0	0	0	0	0	0	0	0	0	0
chrVII	322496	G	C	10	1	YGL096W	tH(GUG)G2	YGL097W	NON_SYNONYMOUS_CODING	0	0	0	0	0	0	0	0	0	0	0	0	0	0	0	0	0	0	0	0	0	0	0	0	0	0	0	0	0	0	0	0	0	0	0	0	0	0	0	0
chrVII	324943	G	A	10	1	YGL096W	YGL097W	NONE	NONE	0	0	0	0	0	0	0	0	0	0	0	0	0	0	0	0	0	10	0	0	0	0	0	0	0	0	0	0	0	0	0	0	0	0	0	0	0	0	0	0
chrVII	327780	T	A	0.9308	1	tE(UUC)G1	YGL095C	NONE	NONE	0	0	0	0	0	0	0	0	0	0	0	0	0	0	0	0	0	0	0	0	0	0	0	0	0	0	0	0	0	0	0.9308	0	0	0	0	0	0	0	0	0
chrVII	346248	C	T	10	1	YGL086W	snR10	NONE	NONE	0	0	0	0	0	0	10	0	0	0	0	0	0	0	0	0	0	0	0	0	0	0	0	0	0	0	0	0	0	0	0	0	0	0	0	0	0	0	0	0
chrVII	349816	C	T	10	1	YGL087C	YGL086W	YGL085W	SYNONYMOUS_CODING	0	0	0	10	0	0	0	0	0	0	0	0	0	0	0	0	0	0	0	0	0	0	0	0	0	0.0103	0	0	0	0	0	0	0	0	0	0	0	0	0	0
chrVII	350244	G	A	0.9901	1	YGL083W	YGL084C	YGL085W	STOP_GAINED	0	0	0	0.9901	0	0	0	0	0	0	0	0	0	0	0	0	0	0	0	0	0	0	0	0	0	0	0	0	0	0	0	0	0	0	0	0	0	0	0	0
chrVII	351925	G	A	10	1	YGL083W	YGL085W	YGL084C	NON_SYNONYMOUS_CODING	0	0	0	0	0	0	0	0	0	0	0	0	0	0	0	0	0	0	0	0	0	0	0	0	0	0	0	0	0	0	0	0	0	0	0	0	0	0	0	0
chrVII	353299	C	G	0.625	0	YGL084C	YGL085W	YGL083W	NON_SYNONYMOUS_CODING	0	0	0	0	0	0	0	0	0	0	0	0	0	0	0	0	0	0	0	0	0	0	0	0	0	0	0	0	0	0	0	0	0	0	0	0	0	0	0	0
chrVII	360996	T	A	10	1	NONE	YGL079W	YGL078C	NON_SYNONYMOUS_CODING	0	0	0	0	0	0	0	0	0	0	0	0	0	0	0	0	0	0	0	0	0	10	0	0	0	0	0	0	0	0	0	0	0	0	0	0	0	0	0	0
chrVII	366696	A	T	0.525	0	snR39B	YGL075C	NONE	NONE	0	0	0	0	0	0	0	0	0	0	0	0	0	0	0	0	0	0	0	0	0	0	0	0	0	0	0	0	0	0	0	0	0	0	0	0	0	0	0	0
chrVII	368654	G	T	0.9673	1	YGL073W	YGL072C	YGL074C	NON_SYNONYMOUS_CODING	0	0	0	0	0	0	0	0	0	0	0	0	0	0.9673	0	0	0	0	0	0	0	0	0	0	0	0	0	0	0	0	0	0	0	0	0	0	0	0	0	0
chrVII	378942	A	T	10	1	YGL069C	YGL065C	YGL066W	NON_SYNONYMOUS_CODING	0	0	0	0	0	0	0	0	0	0	0	0	0	0	0	0	0	0	0	0	0	0	0	0	0	0	0	0	0	0	0	0	0.0089	0	0	0	0	0	0	10
chrVII	384206	G	T	10	1	YGL062W	YGL063C-A	YGL063W	NON_SYNONYMOUS_CODING	0	0	0	0	0	0	0	0	0.0077	10	0	0	0	0	0	0	0	0	0	0	0	0	0	0	0	0	0	0	0	0	0	0	0.0192	0	0	0	0.0067	0	0	0
chrVII	385720	G	C	0.9919	1	YGL063C-A	YGL063W	YGL062W	SYNONYMOUS_CODING	0	0	0	0	0	0	0	0	0	0	0	0	0	0	0	0	0	0	0	0	0	0	0.9919	0	0	0	0.0062	0	0	0	0	0	0	0	0	0	0	0	0	0
chrVII	386674	A	T	10	1	YGL063C-A	YGL063W	YGL062W	SYNONYMOUS_CODING	0	0	0	0	0	0	0	0	0	0	0	0	0	0	0	0	0	0	0	0	0	0	0	0	0	0	0	0	0	0	0	0	0	0	0	0	0	0	0	0
chrVII	399766	A	T	10	1	YGL056C	YGL054C	YGL055W	NON_SYNONYMOUS_CODING	0	0	0	0	0	0	0	0	0	0	0	0	0	0	0	0	0	0	0	0	0	0	0	0	0	0	0	0	0	0	0	0	0	0	0	0	0	0	0	0
chrVII	399795	G	A	10	1	YGL056C	YGL054C	YGL055W	NON_SYNONYMOUS_CODING	0	0	0	0	0	0	0	0	0	0	0	0	0	0	0	0	0	0	0	0	0	0	0	0.0054	0	0	0	0	0	0	0	0.0062	0	0	0	0	0	0	0	0
chrVII	401570	G	C	10	1	YGL054C	YGL055W	tE(UUC)G2	EXON	0	0	0	0	0	0	0	0	0	0	0	0	0	0	0	0	0	0	0	0	0	10	0	0	0	0	0	0	0	0	0	0	0	0	0	0	0	0	0	0
chrVII	401575	A	G	10	1	YGL054C	YGL055W	tE(UUC)G2	EXON	0	0	0	0	0	0	0	0	0	0	0	0	0	0	0	0	0	0	0	0	0	10	0	0	0	0	0	0	0	0	0	0	0	0	0	0	0	0	0	0
chrVII	407397	G	A	10	1	YGL047W	YGL050W	YGL049C	SYNONYMOUS_CODING	0	0	0	0	0	0	0	0	0	0	0	0	0	0	0	0	0	0	0	0	0	0	0	0	0	0	0	0	0	0	0	0	0	0	0	0	0	0	0	0
chrVII	408320	G	T	0.9939	1	YGL047W	YGL050W	YGL049C	NON_SYNONYMOUS_CODING	0	0	0	0	0	0	0	0	0	0	0	0	0	0	0	0	0	0	0	0	0	0.9939	0	0	0	0	0	0	0	0	0	0	0	0	0.0134	0	0	0	0.0066	0
chrVII	408514	T	A	10	1	YGL047W	YGL048C	YGL049C	NON_SYNONYMOUS_CODING	0	0	0	0	0	0	0	0	0	0	0	0	0	0	0	0	0	0	0	0	0	0	0	0	0	0	0	0	0	0.0071	0	0	0	0	0	0	0	0	0	0
chrVII	412317	C	A	10	1	YGL048C	YGL047W	tV(AAC)G1	EXON	0	0	0	0	0.0065	0	0	0	0	0	0	0	0	0	0	0	0	10	0	0	0	0	0	0	0	0	0	0	0	0	0	0	0	0	0	0	0	0	0	0
chrVII	413418	A	G	10	1	YGL045W	YGL047W	NONE	NONE	0	0	0	0	0	0	0	0	0	0	0	0	0	0	0	0	0	0	0	0	0	0	0	0	0	0	0	0	0	0	0	0	0.0164	0	0	0	0	0	0	10
chrVII	422006	C	T	10	1	tL(CAA)G2	YGL041W-A	NONE	NONE	0	0	0	0	0	0	0	0	0	0	0	0	0	0	0	0	0	0	0	0	0	0	0	0	0	0	0	0	0	0	0	0	0	0	0	0	0	0	0	0
chrVII	430913	T	C	10	1	YGL037C	YGL035C	YGL036W	NON_SYNONYMOUS_CODING	0	0	0	0	0	0	0	0	0	0	0	0	0	0	0	0	0	0	0	0	0	0	0	0	0	0	0	0	0	0	0	0	0	0	0	0	0	0	0	0
chrVII	438992	G	A	10	1	YGL030W	tF(GAA)G	NONE	NONE	0	0	0	0	0	0	0	0	0	0	0	0	0	0	0	0	0	0	0	0	0	0	0	0	0	0	0	0	0	0	0	0	0	0	0	0	0	0	0	0
chrVII	439532	C	T	10	1	YGL029W	tF(GAA)G	YGL030W	SYNONYMOUS_CODING	0	0	0	0	0	0	0	0	0	0	0	0	0	0	0	0	0	0	0	0	0	0	0	0	0	0	0	0	0	0	0	0	0	0	0	10	0.0044	0	0	0
chrVII	444793	G	A	10	1	YGL028C	YGL026C	YGL027C	SYNONYMOUS_CODING	0	0	0	0	0	0	0	0	0	0	0	0	0	0	0	0	0	0	0	0	0	0	0	0	0	0	0	0	0	0	0	0	0	0	0	0	0	0	0	0
chrVII	446106	G	T	10	1	YGL028C	YGL026C	YGL027C	NON_SYNONYMOUS_CODING	0	0	0	0.006	0	0	0	0	0	0	0	0	0	0	0	0	0	0	0	0	0	0	0	0	0	0	0	0	0	0	0	0	0	0	0	0	0	0	0	0
chrVII	446870	A	G	10	1	YGL027C	YGL025C	YGL026C	SYNONYMOUS_CODING	0	0	0	0	0	0	0	0	0	0	0	0	0	0	0	0	0	0	0	0	0	0	0	0	0	0	0	0.0116	0	0	0	0	0	0	0	0	0	0	0	0
chrVII	451364	G	A	10	1	YGL022W	YGL024W	YGL023C	NON_SYNONYMOUS_CODING	0	0	0	0	0	0	0	0	0	0	0	0	0	0	0	0	0	0	0	0	0	0	0	0	0	0	0	0	0	0	0	0	0	0	0	0	0	0	0	0
chrVII	451388	G	A	10	1	YGL022W	YGL024W	YGL023C	NON_SYNONYMOUS_CODING	0	0	0	0	0	0	0	0	0	0	0	0	0	0	0	0	0	0	0	0	0	0	0	0	0	0	0	0	0	0	0	0	0	0	0	0	0	0	0	0
chrVII	451956	T	C	0.9919	1	YGL022W	YGL024W	YGL023C	NON_SYNONYMOUS_CODING	0	0	0	0	0.9919	0	0	0	0	0	0	0	0	0	0	0	0	0	0	0	0	0	0	0	0	0	0	0	0	0	0	0	0	0	0	0	0	0	0	0
chrVII	452140	T	C	10	1	YGL023C	YGL024W	NONE	NONE	0	0	0	0	0	0	0	0	0	0	0	0	0	0	0	0	0	0	0	0	0	0	0	0	0	0	0	0	0	0	0	0	0	0	0	0	0	0	0	0
chrVII	455196	G	A	10	1	YGL019W	YGL022W	YGL021W	NON_SYNONYMOUS_CODING	0	0	0	0	0	0	0	0	0	0	0	0	0	0	0	0	0	0	0	0	0	0	0	0	0	0	0	0	0	0	0	0	0	0	0	0	0	0	0	0
chrVII	456266	T	G	0.9925	1	YGL019W	YGL020C	YGL021W	NON_SYNONYMOUS_CODING	0	0	0	0	0	0	0	0	0	0	0	0	0	0	0	0	0	0	0	0	0	0	0	0	0	0	0	0	0	0	0	0	0	0	0	0	0	0	0	0
chrVII	458984	C	A	10	1	YGL017W	YGL018C	YGL019W	NON_SYNONYMOUS_CODING	0	0	0	0	0	0	0.007	0	0	0	0	0	0	0	0	0	0	0	0.0094	0	0	0	0	0	0	0	0	0	0	0	0	0.009	0	0	0	0	0	0	0	0
chrVII	459758	G	C	0.5604	0	YGL018C	YGL019W	NONE	NONE	0	0	0	0	0	0	0	0	0	0	0	0	0	0	0	0	0	0	0	0	0.5604	0	0	0	0	0	0	0	0	0	0	0	0	0	0	0	0	0	0	0
chrVII	460379	A	T	10	1	YGL018C	YGL019W	YGL017W	NON_SYNONYMOUS_CODING	0	0	0	0	0	0	0	0	0	0	0	0	0	0	0	0	0	0	0	0	0	0	0	0	0	0	0	0	0	0	0	0	0	0	0	0	0	0	0	0
chrVII	467100	C	A	10	1	YGL014C-A	YGL013C	YGL014W	NON_SYNONYMOUS_CODING	0	0	0	0	0	0	0	0	0	0	0	10	0	0	0	0	0	0	0	0	0	0	0	0.0069	0	0.0069	0.0056	0	0	0.0064	0	0	0	0.0047	0	0	0	0	0	0
chrVII	468144	C	G	0.9953	1	YGL014C-A	YGL013C	YGL014W	NON_SYNONYMOUS_CODING	0	0	0	0	0	0	0	0	0	0	0	0	0	0	0	0	0	0	0	0	0	0	0	0	0.9953	0	0	0	0	0.0054	0	0	0	0	0	0	0	0	0	0
chrVII	472294	A	G	0.9927	1	YGL012W	YGL011C	YGL013C	SYNONYMOUS_CODING	0	0	0	0	0	0	0	0	0	0	0	0	0	0	0	0	0	0	0	0	0.0091	0	0	0	0.9927	0	0	0	0	0	0	0	0	0	0	0	0	0	0	0
chrVII	480256	A	G	0.5182	0	YGL009C	YGL007C-A	YGL008C	SYNONYMOUS_CODING	0	0	0	0	0	0	0	0	0	0	0	0	0	0	0	0	0	0	0	0	0	0	0	0	0	0	0	0	0	0	0	0	0	0	0	0	0	0	0	0
chrVII	480693	G	C	0.9931	1	YGL009C	YGL007C-A	YGL008C	NON_SYNONYMOUS_CODING	0.0036	0	0	0	0	0	0	0	0	0	0	0	0	0	0	0	0	0	0	0	0	0	0	0	0	0	0	0	0	0	0	0	0.0046	0	0	0	0	0	0	0.9931
chrVII	481617	T	C	10	2	YGL007W	YGL007C-A	YGL008C	NON_SYNONYMOUS_CODING	0	0	0	0	0	0	0	0	0	0	0	0	0	0	0	0	0	0	0	0	0	0	0	0	0	0	0	0	0	0	0	0	0	0	0	0	0	0	0	0
chrVII	483172	C	G	10	1	YGL007W	NONE	NONE	NONE	0	0	0	0	0	0	0	0	0	0	0	0	0	0	10	0	0	0	0	0	0	0	0	0	0	0	0	0	0	0	0	0	0	0	0	0	0	0	0	0
chrVII	488723	G	T	10	1	NONE	YGL005C	YGL006W	SYNONYMOUS_CODING	0	0	0	0	0	0	0.0109	0	0	0.0058	0	0	0	0	10	0	0	0	0	0	0.0085	0	0	0	0	0	0	0	0	0	0	0	0	0	0	0	0	0	0	0
chrVII	513507	A	T	0.9929	1	YGR013W	YGR011W	YGR012W	SYNONYMOUS_CODING	0	0	0	0	0	0	0	0	0	0	0	0	0	0	0	0	0	0	0	0	0	0	0	0	0	0	0	0	0	0	0	0	0	0	0	0	0	0	0	0
chrVII	520718	C	A	0.9956	1	YGR016W	YGR015C	YGR014W	SYNONYMOUS_CODING	0	0	0	0	0	0	0	0.0059	0	0	0	0	0	0	0	0	0	0	0	0	0	0	0	0	0	0	0	0	0	0	0	0	0	0	0	0	0	0	0	0.0075
chrVII	526491	A	T	10	1	YGR021W	YGR020C	YGR019W	NON_SYNONYMOUS_CODING	0	0	0	0	0	0.0045	0	0	0	0	0	0	0	0	0	0	0	10	0	0	0	0	0	0	0	0	0	0	0	0	0	0	0	0	0	0	0	0	0	0
chrVII	530115	C	G	10	1	YGR022C	YGR021W	YGR023W	NON_SYNONYMOUS_CODING	0	0	0	0	0.005	0	0	0	0	0	0	0	0	0	0	0	0	0	0	0	0	0	0	0	0	0	0	0	0	0	0	0	0	0	0	0	0	0	0	0
chrVII	531635	G	C	10	1	YGR025W	YGR024C	tD(GUC)G1	EXON	0	0	0	0	0	0	0	0	0	0	0	0	0	0	0	0	0	0	0	0	0	0	0	0	0	0	0	0	0	0	0	0	0	0	0	0	0	0	0	0
chrVII	544619	C	T	10	1	snR46	YGR029W	tD(GUC)G2	EXON	0	0	0	0	0	0	0	0	0	0	0	0	0	0	0	0	0	0	0	0	0	0	0	0	0	0	0	0	0	0	0	0	0	0	0	0	0	0	0	0
chrVII	547288	C	A	10	1	YGR032W	snR46	YGR031C-A	NON_SYNONYMOUS_CODING	0	0	0	0	0	0	0	0	0.0096	0	0	0	0	0	0	0	0	0	0	0	0	0	0	0	0	0	0	0	0	0	0	0	0	0	0	0	0	0	0	0
chrVII	548613	T	G	0.9938	1	YGR031C-A	YGR031W	YGR032W	NON_SYNONYMOUS_CODING	0	0	0	0	0	0	0	0	0	0	0	0	0	0	0.9938	0	0	0	0	0	0	0	0	0	0	0	0	0	0	0	0	0	0	0	0	0	0	0	0	0
chrVII	552324	A	G	0.9853	1	YGR034W	YGR033C	YGR032W	NON_SYNONYMOUS_CODING	0	0	0	0	0	0	0	0	0	0	0	0	0	0	0	0	0	0	0	0	0	0	0	0	0	0	0	0	0	0	0	0	0	0	0	0	0	0	0	0
chrVII	561143	A	G	10	1	YGR037C	tS(AGA)G	YGR038W	NON_SYNONYMOUS_CODING	0	0.0075	0	0	0	0	0	0	0	0	0	0	0	0	0	0	0	0	0	0	0	0	0	0	0	0	0	0	0	0	0	0	0	0	0	0	0	0	0	0
chrVII	593581	C	A	10	1	YGR052W	YGR053C	NONE	NONE	0	0	0	0	0	0	0	0	0	0	0	0	0	0	0	10	0	0	0	0	0	0	0	0	0	0	0	0	0	0.0061	0	0	0	0	0	0	0	0	0	0
chrVII	598523	A	G	0.9592	1	YGR055W	YGR052W	YGR054W	SYNONYMOUS_CODING	0	0	0	0	0	0	0	0	0	0	0	0	0	0	0	0	0	0	0	0	0	0	0	0	0	0	0	0	0	0	0	0	0	0	0	0	0	0	0	0
chrVII	600192	A	G	10	1	YGR056W	YGR054W	YGR055W	NON_SYNONYMOUS_CODING	0	0	0	0	0	0	0	10	0	0	0	0	0	0	0	0	0	0	0	0	0	0	0	0	0	0	0	0	0	0	0	0	0	0	0	0	0	0	0	0
chrVII	604961	G	C	10	1	YGR058W	YGR056W	YGR057C	NON_SYNONYMOUS_CODING	0	0	0	0	0	0	0	0	0	0	0	0	0	0	0	0	0	0	0	0	0	0	0	0	0	0	0	0	0	0	0	0	0	0	0	0	0	0	0	0
chrVII	605601	C	A	0.479	0	YGR057C	YGR056W	NONE	NONE	0.0043	0	0	0	0	0	0	0	0	0	0	0	0	0	0	0.0037	0.479	0	0	0	0	0	0	0	0	0	0	0	0	0	0	0.0048	0.005	0	0	0	0	0	0	0
chrVII	617260	C	G	10	1	YGR064W	YGR063C	YGR062C	NON_SYNONYMOUS_CODING	0	0	0	0	0	0	0	0	0	0	0	0	0	0	0	0	0	0	0	0	0	0	0	0	0	0	0	0	0	0	0	0	0	0	0	0	0	0	0	0
chrVII	623365	T	C	10	1	YGR066C	YGR068C	YGR067C	NON_SYNONYMOUS_CODING	0	0	0	0	0	0	0	0	0	0	0	0	0	0	0	0.0076	0	0	0	0	0	10	0	0	0	0	0	0	0	0	0	0	0	0	0	0	0	0	0	0
chrVII	623472	G	T	0.9939	1	YGR066C	YGR068C	YGR067C	NON_SYNONYMOUS_CODING	0	0	0	0	0	0	0	0	0	0	0	0	0	0	0	0	0	0	0	0	0	0	0	0	0	0	0	0	0	0	0	0	0.0103	0	0	0	0	0	0	0
chrVII	625844	A	G	10	1	YGR068W-A	NONE	YGR068C	SYNONYMOUS_CODING	0	0	0	0	0	0	0	0	0	10	0	0	0	0	0	0	0	0	0	0	0	0	0	0	0	0	0	0	0	0	0	0	0	0	0	0	0	0	0	0
chrVII	626569	G	C	10	1	YGR069W	YGR068W-A	YGR068C	NON_SYNONYMOUS_CODING	0	0	0	0	0	0	0	0	0	0	0	0	0	0	0	0	0	0	0	0	0	0	0	0	0	0	0	0	0	0	0	0	0	0	0	0	0	0	0	0
chrVII	632537	A	C	10	1	YGR072W	YGR070W	YGR071C	NON_SYNONYMOUS_CODING	0	0	0	0	0	0	0	0	0	0	0	0	0	0	0	0	0	0	0	0	0	0	0	0	0	0	0	0	0	0	0	0	0	0	0	0	0	0	0	0
chrVII	635226	C	G	0.9944	1	YGR074W	YGR073C	YGR072W	NON_SYNONYMOUS_CODING	0	0	0	0	0	0	0	0	0	0	0	0	0	0	0	0	0	0	0	0	0.0079	0	0	0	0	0	0	0	0	0	0	0	0.0063	0	0.0066	0	0	0	0	0
chrVII	645984	G	C	10	1	YGR081C	YGR084C	YGR083C	NON_SYNONYMOUS_CODING	0	0	0	0	0	0	0	0	0	0	0	0	0	0	0	0	0	0	0	0	0	0	0	0	0	0	0.0045	0	0	0	0	0	0	0	0	0	0	0	0	0
chrVII	648389	A	T	10	1	YGR084C	YGR086C	YGR085C	STOP_LOST	0	0	0	0	0	0	0	0.0052	0	0	0	0	0	0	0	0	0	0	0	0	0	0	0	0	0	0	0	0	0	0	0	0	0	0	0	0	0	10	0	0
chrVII	654469	T	A	10	1	YGR088W	NONE	NONE	NONE	0	0	0	0	0	0	0	0	0	0	0	0	0	0	0	0	0	0	0	0	0	0	0	0	0	0	0	0	0	0	0	0	0	0	0	0	10	0	0	0
chrVII	656272	A	G	10	1	YGR089W	NONE	YGR088W	SYNONYMOUS_CODING	0	0	0	0	0	0	0	0	0	0	10	0	0	0	0	0	0	0	0	0	0	0	0	0	0	0	0	0	0	0	0	0	0	0	0	0	0	0	0	0
chrVII	661735	G	C	10	1	tT(UGU)G1	YGR089W	NONE	NONE	0	0	0	0	0	0	0	0	10	0	0	0	0	0	0	0	0	0	0	0	0	0	0	0	0	0	0	0	0	0	0	0	0	0.0047	0	0	0	0	0	0
chrVII	661792	C	A	10	1	YGR090W	YGR089W	tT(UGU)G1	EXON	0	0	0	0	0	0	0.0144	0	0	0	0	0	0	0	0	0	0	0	0	0	0	0	0	0	0	0	0	0	0	0	0	0	0	0	0	10	0	0	0	0
chrVII	662277	A	T	0.8325	1	YGR090W	tT(UGU)G1	NONE	NONE	0	0	0	0	0.0046	0	0	0	0	0	0	0	0	0	0	0	0	0	0	0	0	0	0	0	0	0	0	0	0	0	0	0	0	0	0	0	0	0	0	0
chrVII	663676	C	A	10	2	YGR091W	tT(UGU)G1	YGR090W	NON_SYNONYMOUS_CODING	0	0	0	0.0063	0	0	0	0	0	0	0	0	0	0	0	0	0	0	0	0	0	0	0	0	0	0	0	0	0	0	0	0	0	0	0	0	0	0	0	0
chrVII	666418	A	G	0.9955	1	YGR092W	YGR090W	YGR091W	NON_SYNONYMOUS_CODING	0	0	0	0	0	0	0	0	0	0	0	0	0	0	0	0	0	0	0	0	0	0	0	0	0	0	0	0	0	0	0	0	0	0	0	0.9955	0	0	0	0
chrVII	674138	A	G	10	1	YGR096W	YGR095C	YGR094W	NON_SYNONYMOUS_CODING	0	0	0	0	0	0	0	0	0	0	0	0	0	0	0	0	0	0	0	0	0	0	0	0	0	0	0	0	0	0	0	0	0	0	0	0	0	0	0	0
chrVII	674627	C	G	0.9768	1	YGR096W	YGR095C	YGR094W	NON_SYNONYMOUS_CODING	0	0	0	0	0	0	0	0	0	0	0	0	0	0	0	0	0	0	0	0	0	0	0	0	0	0	0	0	0	0	0	0	0	0	0	0	0	0	0	0
chrVII	680630	C	G	10	1	YGR095C	YGR098C	YGR097W	NON_SYNONYMOUS_CODING	0	0	0	0	0	0	0	0	0	0	0	0	0	0	0	0	0	0	0	0	0	0	0	0	0	0	0	0	0	0	0	0	0	0	0	0	0	0	0	0
chrVII	687984	G	A	0.8387	1	YGR098C	NONE	YGR099W	NON_SYNONYMOUS_CODING	0	0	0	0	0	0	0	0	0	0	0	0	0	0	0	0	0	0	0	0	0	0	0	0	0	0	0	0	0	0	0	0	0	0	0	0	0	0	0	0
chrVII	691095	T	C	10	1	YGR101W	YGR099W	YGR100W	NON_SYNONYMOUS_CODING	0	0	0	0	0	0	0	0	0	0	0	0	0	0	0	0	0	0	0	0	0	0	0	0	0	0	0	0.0051	10	0	0	0	0	0	0	0	0	0	0	0
chrVII	692069	G	T	10	1	YGR101W	YGR099W	YGR100W	SYNONYMOUS_CODING	0	0	0	0	0	0	0	0	0	0	0	0	0	0	0	0	0	0	0	0	0	0	0	0	0	0	0.0053	0	0	0	0	0	0	0	0	0	0	0	0	0
chrVII	700655	A	T	10	1	tL(GAG)G	tK(UUU)G2	NONE	NONE	0	0	0	0	0	0	0	0	0	0	0	0	0	0	0	0	0	0	0	0	0	0	0	0	0	0	0	0	0	0	0	0	0	0	0	0	0	0	0	0
chrVII	701024	G	A	0.4153	0	YGR106C	tL(GAG)G	tK(UUU)G2	EXON	0	0	0	0	0	0	0	0	0	0	0	0	0	0	0	0	0	0	0	0	0	0	0	0	0	0	0	0	0	0	0	0	0	0	0	0	0	0	0	0
chrVII	705710	C	A	10	1	YGR109W-A	YGR108W	YGR109C	NON_SYNONYMOUS_CODING	0	0	0	0	0	0	0	0	0	0	0	0.012	0	0	0	0	0	0	0	0	0	0	0	0	0	0	0	0	0	0	0	0.0056	0	0	0	0	0.0047	0.006	0	0
chrVII	714110	C	T	10	1	YGR111W	YGR109W-B	YGR110W	NON_SYNONYMOUS_CODING	0	0	0	0	0	0	0	0	0	0	0	0	0	0	0	0	0	0	0	0	0	0	0	0	0	0	0	0	0	0	0	0	0	0	0	0	0	0	0	0
chrVII	723470	A	G	0.9952	1	YGR115C	YGR117C	YGR116W	NON_SYNONYMOUS_CODING	0.0043	0	0	0	0	0	0	0	0.9952	0	0	0	0	0	0	0	0	0	0	0	0	0	0	0	0	0	0	0	0	0	0	0	0	0	0	0	0	0	0	0
chrVII	725025	C	A	10	1	YGR118W	YGR117C	NONE	NONE	0	0	0	0	0	0	0	0	0	0	0	0.0075	0	0	0	0	0	0	0	0	0	0	0	0	0	0	0	0	0	0	0	0	0	0	0	0	0	0	0	10
chrVII	731153	C	G	10	1	YGR120C	YGR121C	tN(GUU)G	EXON	0	0	0	0	0	0.0049	0	0	0	0	0	0	0	0	0	0	0	0	0	0	0	0	0	0	0	0	0	0	0	0	0	0	0.0074	0	0	0	0	0	0	0
chrVII	731210	G	A	0.4356	0	YGR120C	YGR121C	tN(GUU)G	EXON	0	0	0	0	0	0	0	0	0	0	0	0	0.0063	0	0	0	0	0	0	0	0.4356	0	0	0	0	0	0	0	0	0	0	0	0	0	0	0	0	0	0	0
chrVII	731210	G	T	0.5644	0	YGR120C	YGR121C	tN(GUU)G	EXON	0	0	0	0.0061	0	0	0	0	0	0	0	0	0	0	0	0	0	0	0	0	0.5644	0	0	0	0	0	0	0	0	0	0	0	0	0	0	0	0	0	0	0
chrVII	740658	G	T	10	1	YGR125W	tI(AAU)G	YGR124W	NON_SYNONYMOUS_CODING	0	0	0	0	0	0	0	0	0	0	0	0	0	0	0	0	0	0	0	0	0	0	0	0	0	0	0	0	0.0075	0	0	0	0	0	0	0	0	0	0	0
chrVII	744087	A	G	0.8385	1	YGR126W	YGR124W	YGR125W	SYNONYMOUS_CODING	0	0	0	0	0	0	0	0	0	0	0	0	0	0	0	0	0	0	0	0	0	0	0	0	0	0	0	0	0	0	0	0	0	0	0	0	0	0	0	0
chrVII	751071	A	T	0.9912	1	YGR128C	YGR129W	NONE	NONE	0	0	0	0	0	0	0	0	0	0	0	0.9912	0	0	0	0	0	0	0	0	0	0	0	0	0	0	0	0	0	0	0	0	0	0	0	0	0	0	0	0
chrVII	754626	A	C	10	1	YGR131W	YGR132C	NONE	NONE	0	0	0	0	0	0	0	0	0	0	0	0	0	0	0	0	0	0	0	0	0	0	0	0	0	0	0	0	0	0	0	0	0	0	0	0	0	0	0	0
chrVII	754631	C	G	10	1	YGR131W	YGR132C	NONE	NONE	0	0	0	0	0	0	0	0	0	0	0	0	0	0	0	0	0	0	0	0	0	0	0	0	0	0	0	0	0	0	0	0	0	0	0	0	0	0	0	0
chrVII	769779	A	G	10	1	YGR141W	YGR139W	YGR140W	SYNONYMOUS_CODING	0	0	0	0	0	0	0	0	0	0	0	0	0	0	0	0	0	0	0	0	0	0	0	0	0	0	0	0	0	0	0	0	0	0	0	0	0	0	0	0
chrVII	770431	A	G	0.5625	0	YGR141W	YGR140W	NONE	NONE	0	0	0	0	0	0	0	0	0	0	0.0057	0	0	0	0	0	0	0	0	0	0	0	0	0	0	0	0	0	0	0	0	0.5625	0	0	0	0	0	0	0	0
chrVII	779279	T	A	10	1	tG(UCC)G	YGR143W	NONE	NONE	0	0	0	0	0	0	0	0	0	0	0	0	0	0	0	0	0	0	0	0	0	0	0	0	0	0	0	0	10	0	0	0	0	0	0	0	0	0	0	0
chrVII	779503	T	C	0.9948	1	tG(UCC)G	YGR143W	NONE	NONE	0	0	0	0	0	0	0	0	0	0	0	0	0	0	0	0	0	0	0	0	0	0	0	0	0	0	0.0051	0	0	0	0	0	0	0	0	0	0	0	0	0
chrVII	782953	C	T	0.9801	1	NONE	YGR146C	YGR145W	SYNONYMOUS_CODING	0	0	0	0	0	0	0	0	0	0	0	0	0	0	0	0	0	0.9801	0	0	0	0	0	0	0	0	0	0	0	0	0	0	0	0	0	0	0	0	0	0
chrVII	794425	C	T	10	1	YGR150C	YGR151C	tA(UGC)G	EXON	0	0	0	0	0	0	0	0	0	0	0	0	0	0	0	0	0	0	0	0	0	0	0	0	0	0	0	0	0	0	0	0	0	0	0	0	0	0	0	0
chrVII	797955	T	A	0.9903	1	YGR154C	YGR153W	NONE	NONE	0	0	0	0	0	0	0	0	0	0	0	0	0	0	0	0	0	0	0	0	0	0	0	0	0	0	0	0	0	0	0	0	0	0	0	0	0	0	0	0
chrVII	806339	A	T	0.9895	1	YGR158C	YGR159C	NONE	NONE	0	0	0	0	0	0	0	0	0	0	0	0	0	0	0	0	0	0	0	0	0	0	0	0	0	0	0	0	0	0	0	0	0	0	0	0	0	0	0	0
chrVII	807377	A	C	10	1	YGR158C	YGR161C	YGR160W	NON_SYNONYMOUS_CODING	0	0	0	0	0	0.0034	0	0	0	0	0	10	0	0	0	0	0	0	0	0	0	0	0	0	0	0	0	0	0	0	0	0	0	0	0	0	0	0	0	0
chrVII	807829	A	G	0.7652	1	YGR159C	YGR160W	NONE	NONE	0	0	0	0	0	0	0	0	0	0	0	0	0	0	0	0	0	0	0	0	0	0	0	0	0	0	0	0	0	0	0	0	0	0	0	0	0	0	0	0
chrVII	809472	G	T	10	1	YGR161C	YGR160W	NONE	NONE	0	0	0	0	0	0	0	0	0	0	0	0	10	0.0635	0	0	0	0	0	0	0	0	0	0	0	0	0	0	0	0	0	0	0	0	0	0	0	0	0	0
chrVII	827933	T	G	10	1	YGR164W	tR(UCU)G2	YGR163W	NON_SYNONYMOUS_CODING	0	0	0	0	0	0	0	0	0	0	0	0	0	0	0	0	0	0	0	0	0	0.0062	0	10	0	0	0	0	0	0	0	0	0	0	0.0072	0	0	0.0062	0	0
chrVII	839553	A	G	10	1	YGR169C-A	YGR171C	YGR170W	NON_SYNONYMOUS_CODING	0	0	0	0	0	0	0	0	0	0	0	0	0	0	0	0	0	0	0	0	0	0	0	0	0	0	0	0	0	0	0	0	0	0	0	0	0	0	0	0
chrVII	840340	C	T	10	1	YGR173W	YGR171C	YGR170W	NON_SYNONYMOUS_CODING	0	0	0	0	0	0	0	0	0	0	0	0	0	0	0	0	0	10	0	0	0	0	0	0	0	0	0	0	0	0.0049	0	0	0	0	0	0	0	0	0	0
chrVII	844015	G	T	10	1	YGR172C	YGR174C	YGR173W	NON_SYNONYMOUS_CODING	0	0	0	0	0	0	0	0	0	0	0	0	10	0.0481	0	0	0	0	0	0	0	0	0	0	0	0	0	0	0	0	0	0	0	0	0	0	0	0	0	0
chrVII	844878	G	C	10	1	tG(GCC)G1	YGR174C	YGR173W	NON_SYNONYMOUS_CODING	0	0	0	0	0	0	0	0	0	0	0	0	0	0	0	0	0	0	0	0	0	0	0	0	0	0	0	0	0	0	0	0	0	0	0	0	0	10	0	0
chrVII	845637	T	C	0.9928	1	tG(GCC)G1	YGR174C	NONE	NONE	0	0	0	0	0	0	0	0	0	0	0	0	0	0	0	0	0	0	0	0	0	0	0	0	0	0	0	0	0	0	0	0	0	0	0	0	0.9928	0	0	0
chrVII	846999	A	C	10	1	YGR174C	YGR174W-A	YGR175C	NON_SYNONYMOUS_CODING	0	0	0	0	0	0	0	0	0	0	0	0	0	0	0	0	0	0	0	0	0	0	0	0	0	0	0	0	0	0	0	0	0	0	0	0	0	0	0	0
chrVII	848169	A	G	10	1	YGR176W	YGR177C	YGR175C	NON_SYNONYMOUS_CODING	0.0034	0	10	0	0	0	0	0	0	0	0	0	0	0	0	0	0	0	0	0	0	0	0	0	0	0	0	0	0	0	0	0	0	0	0	0	0	0	0	0
chrVII	860279	G	T	10	1	YGR183C	YGR181W	YGR184C	NON_SYNONYMOUS_CODING	0	0	0	10	0	0	0	0	0	0	0	0	0	0	0	0.0036	0	0	0	0	0	0	0	0	0	0	0.0045	0	0	0	0	0	0	0	0	0	0	0	0	0
chrVII	868314	C	T	0.9899	1	YGR185C	YGR187C	YGR186W	NON_SYNONYMOUS_CODING	0	0	0	0	0	0	0	0	0	0	0	0	0	0	0	0	0	0	0	0	0	0	0	0	0	0	0	0	0	0	0	0	0	0	0	0	0	0	0	0
chrVII	868413	C	G	0.5906	0	YGR185C	YGR187C	YGR186W	NON_SYNONYMOUS_CODING	0	0	0	0	0	0	0	0	0	0	0	0	0	0	0	0	0	0	0.0088	0	0	0	0	0	0	0	0	0	0	0	0	0	0	0	0	0	0	0	0	0
chrVII	868486	C	A	0.9945	1	YGR185C	YGR187C	YGR186W	SYNONYMOUS_CODING	0	0.0085	0	0	0.0046	0	0	0	0	0	0	0	0	0	0	0.0042	0	0	0	0	0	0	0	0	0	0	0	0	0	0	0	0	0.9945	0	0	0.0116	0	0	0	0.007
chrVII	873537	T	C	10	1	YGR187C	YGR189C	YGR188C	SYNONYMOUS_CODING	0	10	0	0	0	0	0	0	0	0	0.0049	0	0	0	0	0	0	0	0	0	0	0	0	0	0	0	0	0	0	0	0	0	0	0	0	0	0	0	0	0
chrVII	873910	T	C	0.9939	1	YGR187C	YGR189C	YGR188C	NON_SYNONYMOUS_CODING	0	0	0	0	0	0	0	0	0	0	0.9939	0	0	0	0	0	0	0	0	0	0	0	0	0	0	0	0	0	0	0	0	0	0	0	0	0	0	0	0	0
chrVII	877752	G	C	10	1	YGR188C	tW(CCA)G2	YGR189C	NON_SYNONYMOUS_CODING	0	0	0	0	0	0	0	0	0	0	0	0	0	0	0	0	0	0	0	0	0	0	0	0	0	0	0	0	0	0	0	0	0	0	0	0	0	0	0	0
chrVII	879579	A	G	10	1	tW(CCA)G2	YGR190C	NONE	NONE	0	0	0	0	0	0	0	0	0	0	0	0	0	0	0	0	0	0	0	0	0	0	0	0	0	0	0	0	0	0	0	0	0	0	0	0	0	0	0	0
chrVII	882521	T	G	10	1	YGR190C	YGR191W	NONE	NONE	0	0	0	0	0	0	0	0	0	0	0	0	0	0	0	0	0	0	0	0	0	0	0	0	0	0	0	0	0	0	0	0	0	0	0	0	0	0	0	0.0085
chrVII	892002	C	G	0.9942	1	YGR198W	YGR197C	YGR196C	NON_SYNONYMOUS_CODING	0	0	0	0	0	0	0	0	0	0	0	0	0	0	0	0	0	0	0.9942	0	0	0	0	0	0	0	0	0	0	0	0	0	0	0	0	0.0041	0	0	0	0
chrVII	893545	A	G	10	1	YGR198W	YGR195W	YGR197C	SYNONYMOUS_CODING	0	0	0	0	0	0	0	0	0	0	0	0	0	0	0	0	0	0	0	0	0	0	0	0	10	0.0056	0	0	0	0	0	0	0	0.0045	0	0	0	0	0	0
chrVII	893978	C	G	10	1	YGR198W	YGR195W	YGR197C	SYNONYMOUS_CODING	0	0	0	0	0	0	0	0	10	0	0	0	0	0	0	0	0	0	0	0	0	0	0	0	0	0	0	0	0	0	0	0	0	0	0	0	0	0	0.0079	0
chrVII	895027	C	T	10	1	YGR197C	YGR200C	YGR198W	SYNONYMOUS_CODING	0	0	0	0	0	0	0	0	10	0	0	0	0	0	0	0	0	0	0	0	0	0	0	0	0	0	0	0	0	0	0	0	0	0	0	0	0	0	0	0
chrVII	898380	A	G	0.9921	1	YGR197C	YGR198W	YGR199W	NON_SYNONYMOUS_CODING	0	0	0	0	0	0	0	0	0	0	0.0052	0	0	0	0	0	0	0	0	0	0	0	0	0	0	0	0	0	0	0	0	0	0	0	0	0	0	0	0	0
chrVII	905653	G	T	0.9855	1	YGR204W	YGR204C-A	YGR203W	NON_SYNONYMOUS_CODING	0	0	0	0	0	0	0	0	0	0	0	0	0	0	0	0	0	0	0	0	0	0	0	0	0	0	0	0	0	0	0	0	0	0.9855	0.0175	0	0	0	0	0
chrVII	907286	A	T	10	1	YGR205W	YGR203W	YGR204W	NON_SYNONYMOUS_CODING	0	0	0	0	0	0	0	0	0	0	0	0	0	0	0	0	0	0	0.0095	0	0	0	0	0	0	0	0	0	0	0	0	0	0	0	0	0	0	0	0	0
chrVII	918328	C	T	0.9894	1	YGR214W	YGR213C	YGR212W	SYNONYMOUS_CODING	0	0	0	0	0	0	0	0	0	0	0	0	0	0	0	0	0	0	0	0	0	0	0	0	0	0	0	0	0	0	0	0	0	0	0	0	0	0	0	0
chrVII	920518	C	T	10	1	YGR214W	YGR212W	NONE	NONE	0	0	0	0	0	0	0	0	0	0	0	0	0	0	0	0	0	0	0	0	0	0	0	0	0	0	10	0	0	0	0	0	0	0	0	0	0	0	0	0
chrVII	921795	T	G	10	1	YGR215W	YGR214W	NONE	NONE	0	0	0	0	0	0.0079	10	0	0	0	0	0	0.0097	0	0	0	0	0	0	0	0	0	0	0	0	0	0	0	0	0	0	0	0	0	0	0	0	0	0	0
chrVII	932351	G	C	10	1	YGR218W	YGR217W	NONE	NONE	0	0	0	0	0	0	0	0	0	0	0	0	0	0	0	0	0	0	0	0	0	0	0	0	0	0	0	0	0	0	0	0	0	0	0	0	0	0	0	0
chrVII	944580	G	A	10	1	YGR225W	YGR226C	YGR224W	NON_SYNONYMOUS_CODING	0	0	0	0	0	0	0	0	0	0	0	0	0	0	0	0	0	0	0	0	0	0	0	0	0	0	0	0	0	0	0	0	0	0	0	0	0	0	0	0
chrVII	945421	T	C	10	1	YGR227W	YGR224W	YGR225W	NON_SYNONYMOUS_CODING	0	0	0	0	0	0	0	0	0	0	0	0	0	0	0	0	0	0	0	0	0	0	0	0	0	0	0	0	0	0	0	0	0	0	0	0	0	0	0	0
chrVII	947150	T	A	10	1	YGR226C	YGR225W	NONE	NONE	0	0	0	0	0	0	0	0	0	0	0	0	0	0	0	0	0	0	0	0	0	0	0	0	0	0	0	0	0	0	0	0	0	0	0	0	0	0	0	0
chrVII	955448	T	A	0.9852	1	YGR231C	YGR232W	YGR233C	NON_SYNONYMOUS_CODING	0	0	0	0	0	0	0	0	0	0	0	0	0	0	0	0	0	0	0	0	0	0	0	0	0	0	0	0	0	0.9852	0	0	0	0	0	0	0	0	0	0
chrVII	956216	T	A	10	1	YGR231C	YGR232W	YGR233C	NON_SYNONYMOUS_CODING	0	0	0	0	0	0.0056	0	0	0	10	0	0	0	0	0	0	0	0	0	0	0	0	0	0	0	0	0	0	0	0	0	0	0	0	0	0	0	0	0	0
chrVII	959164	A	C	10	1	YGR234W	YGR235C	NONE	NONE	0	0	0	0	0	0	0	0	0	0	0	0	0	0	0	0	0	0	0	0	0	0	0	0	0	0	0	0	0	0	0	0	0	0	0	0	0	0	0	0
chrVII	960597	A	T	10	1	YGR233C	YGR235C	YGR234W	NON_SYNONYMOUS_CODING	0	10	0	0	0	0	0	0	0	0	0	0	0	0	0	0	0	0	0	0	0	0	0	0	0	0	0	0	0	0	0	0	0	0	0	0	0	0	0	0
chrVII	961957	T	C	10	1	YGR233C	YGR236C	YGR235C	NON_SYNONYMOUS_CODING	0	0	0	0	0	0	0	0	0	0	0	0	0	0	0	0	0	0	0	0	0	0	0	0	0	0	0	0	0	0	0	0	0	0	0	0	0	0	0	0
chrVII	962124	C	G	0.9683	1	YGR235C	YGR236C	NONE	NONE	0	0	0	0	0	0	0	0	0	0	0	0	0	0	0	0	0	0	0	0	0	0	0	0	0	0	0	0	0	0	0	0	0	0	0	0	0	0	0	0
chrVII	964353	A	T	0.9888	1	YGR236C	YGR238C	YGR237C	SYNONYMOUS_CODING	0	0	0	0	0	0	0	0	0	0	0	0	0	0	0	0	0	0	0	0	0	0	0	0	0	0	0	0	0	0	0	0	0.9888	0	0	0	0	0	0	0
chrVII	964872	T	C	10	1	YGR236C	YGR238C	YGR237C	SYNONYMOUS_CODING	0	0	0	0	0	0	0	0	0	0	0	0	0	0	0	0	0	0	0	0	0	0	0	0	0	0	0	0	0	0	0	0	0	0	0	0	0	0	0	0
chrVII	974125	C	T	10	1	YGR240C	YGR240C-A	NONE	NONE	0	0	0	0	0	0	0	0	0	0	0	0	10	0.045	0	0	0	0	0	0	0	0	0	0	0	0	0	0	0	0	0	0	0	0.0043	0	0	0	0	0	0
chrVII	986215	C	G	10	1	YGR249W	YGR247W	YGR248W	NON_SYNONYMOUS_CODING	0.0044	0	0	0	0	0	0	0	0	0	10	0	0	0	0	0	0	0	0	0	0	0	0	0	0	0	0	0	0	0	0	0	0	0	0	0	0	0	0	0
chrVII	986278	A	G	0.6889	0	YGR249W	YGR247W	YGR248W	NON_SYNONYMOUS_CODING	0	0	0	0	0	0	0	0	0	0	0	0	0	0	0	0	0	0	0	0	0	0	0	0	0	0	0	0	0	0	0	0	0	0	0	0	0	0	0	0
chrVII	994213	T	G	10	1	YGR250C	YGR253C	NONE	NONE	0	0	0	0	0	0	0	0	0	0	10	0	0	0	0	0	0	0	0	0	0	0	0	0	0	0	0	0	0	0	0	0	0	0	0	0	0	0	0	0
chrVII	1009111	T	A	10	1	YGR257C	YGR256W	YGR258C	SYNONYMOUS_CODING	0	0	0	0	10	0	0	0	0	0	0	0	0	0	0	0	0	0	0	0	0	0	0	0	0	0	0	0	0	0	0	0	0	0	0	0	0	0	0	0
chrVII	1010527	T	A	10	1	YGR260W	YGR259C	YGR258C	SYNONYMOUS_CODING	0	0	0	0	0	0	0	0	0	0	0	0.0065	0	0	0	0	0	0	0	0	0	0	0	0	0	0	0	0	0	0	0	0	0	0	0	0	0	0	0	0
chrVII	1012117	A	T	10	1	YGR260W	YGR259C	NONE	NONE	0	0	0	0	0	0	0	0	0	0	0	0	0	0	0	0	0	0	0	0	0	0	0	0	0	0	0	0	0	0	0	0	0	0	0	0	0	0	0	0
chrVII	1019305	G	T	10	1	YGR263C	YGR264C	NONE	NONE	0	0	0	0	0	0	0	0	0	0	0	0	0	0	0	0	0	0	0	0	0	0	0	0	0	0	0	0	0	10	0	0	0	0	0	0	0	0	0	0
chrVII	1021966	G	C	10	1	YGR264C	YGR267C	YGR265W	NON_SYNONYMOUS_CODING	0	0	0	0	0	0	0	0	0	0	0	0	0	0	0	0	0	0	0	0	0	0	0	0	0	0	0	0	0	0	0	0	0	0	0	0	0	0	0	0
chrVII	1036510	A	G	10	1	NONE	YGR271C-A	YGR271W	NON_SYNONYMOUS_CODING	0.0045	0	0	0	0	0	0	0	0	0	0	0	0	0	0	0	0	0	0	0	0	0	0	0	0	0	0	0	0	0	0	0	0	0	0	0	0	0	0	0
chrVII	1036512	A	C	0.9905	1	NONE	YGR271C-A	YGR271W	SYNONYMOUS_CODING	0	0	0	0	0	0	0	0	0	0	0	0	0	0	0	0	0	0	0	0	0	0	0	0	0	0	0	0	0	0	0	0	0	0	0	0	0	0	0	0
chrVII	1036518	G	T	10	1	NONE	YGR271C-A	YGR271W	NON_SYNONYMOUS_CODING	0	0	0	0	0	0	0.0116	0	0	0	0	0	0	0	0	0	0	0.0068	0	0	0	0	0	0	0	0	0	0	0	0	0	0	0	0	0	0	0	0	0	0
chrVII	1038165	G	T	0.6	0	NONE	YGR271W	YGR271C-A	NON_SYNONYMOUS_CODING	0	0	0	0	0	0	0	0	0	0	0	0	0	0	0	0.0053	0	0	0	0	0.6	0	0	0	0	0	0	0	0	0	0	0	0	0	0	0	0	0	0	0
chrVII	1058049	G	T	10	1	NONE	YGR281W	YGR282C	NON_SYNONYMOUS_CODING	0	0	0	0	0	0	0	0	0	0	0	0	0	0	0	0	0	0	0	0	0	0	0	0	0	0	0	0	0	0	0	0	0	0	0	0	0	0	0	0
chrVII	1058333	G	C	10	1	NONE	YGR283C	YGR282C	SYNONYMOUS_CODING	0	0	0	0	0	0	0	0	0	0	0	0	0	0	0	0	0	0	0	0	0	0	0	0	0	0	0	0	0	10	0	0	0	0	0	0	0	0	0	0
chrVII	1061335	C	A	10	1	YGR283C	YGR285C	YGR284C	NON_SYNONYMOUS_CODING	0	0	0	0	0	0	0	0	0	0	0	0	0	0	0	0	0	0	0	0	0	0	0	0	0	0	0	0	0	0.0054	0	0	0	0	0	0	0	0	0	0
chrVII	1073540	C	T	10	1	YGR290W	YGR289C	NONE	NONE	0	0	0	0	0	0	0	0	0	0	0.005	0	0	0	0	0	0	0	0	0	0	0	0	0	0	0	0	0	0	0	0	0	0	0	0	0	0	0	0	0
chrVII	1081820	T	A	10	1	YGR293C	YGR294W	YGR295C	NON_SYNONYMOUS_CODING	0.0036	0	0	0	0	0	10	0	0	0	0	0	0	0	0	0	0	0	0	0	0	0	0	0	0	0	0	0	0	0	0	0	0	0	0	0	0	0	0	0
chrVII	1081833	C	T	0.9834	1	YGR293C	YGR294W	YGR295C	NON_SYNONYMOUS_CODING	0	0	0	0	0	0	0	0	0	0	0	0	0	0	0	0	0	0	0	0	0	0	0	0	0	0	0	0	0	0	0	0	0	0	0	0	0	0	0	0
chrVIII	9739	A	G	10	1	YHL046W-A	YHL046C	YHL047C	NON_SYNONYMOUS_CODING	0	0	0	0	0	0	0	0	0	0	0	0	0	0	0	0	0	0	0	0	0	0	0	0	0	0	0	0	0	0	0	0	0.0052	0	0	0	0	0	0	0
chrVIII	10099	C	G	10	1	YHL045W	YHL046C	YHL047C	NON_SYNONYMOUS_CODING	0	0	0	0	0	0	0	0	0	0	0	0	0	0	0	0	0	0	0	0	0	0	0	0	0	0	0	0	0	0	0	0	0	0	0	0	0	0	0	0
chrVIII	15151	A	G	10	1	YHL042W	YHL044W	YHL043W	NON_SYNONYMOUS_CODING	0	0	0	0	0	0	0	0	0	0	0	0	0	0	0	0	0	0	0	0	0	0	0	0	0	0	0	0	0	0	0	0	0	0	0	0	0	0	0	0
chrVIII	15153	A	G	10	1	YHL042W	YHL044W	YHL043W	SYNONYMOUS_CODING	0	0	0	0	0	0	0.0072	0	0	0	0	0	0	0	0	0	0	0	0	0	0	0	0	0	0	0	0	0	0	0	0	0	0.0154	0	0	0	0	0	0	10
chrVIII	19009	G	C	10	1	YHL039W	YHL040C	NONE	NONE	0	0	0	0	0	0	0	0	0	0	0	0	0	0	0	0	0	0	0	0	0	0	0	0	0	0	0	0	0	0	0	0	0	0	0	0	0	0	0	0
chrVIII	23465	A	G	0.9153	1	YHL040C	YHL038C	YHL039W	SYNONYMOUS_CODING	0	0	0	0	0	0	0	0	0	0	0	0.006	0	0	0	0	0	0	0.9153	0	0	0	0	0	0	0	0	0	0	0	0	0	0	0	0	0	0	0	0	0
chrVIII	29510	A	T	10	1	YHL037C	YHL036W	YHL035C	NON_SYNONYMOUS_CODING	0	0	0	0	0	0	0	0	0	0	0	0	0	0	0	0	0	0	0	0	0	0	0	0	0	0	0	0	0	0	0	0	10	0	0	0	0	0	0	0
chrVIII	34875	A	T	0.9932	1	YHL034C	YHL033C	NONE	NONE	0	0	0	0	0	0	0	0	0	0	0	0	0	0	0	0	0	0	0	0	0	0	0	0	0	0	0	0	0	0	0	0	0	0	0.9932	0	0	0	0	0
chrVIII	35322	A	G	10	1	YHL034C	YHL032C	YHL033C	SYNONYMOUS_CODING	0	0	10	0	0	0	0	0	0	0	0	0	0	0	0	0	0	0	0	0	0	0	0	0	0	0	0	0	0	0	0	0	0	0	0	0	0	0	0	0
chrVIII	43561	G	T	10	1	YHL031C	YHL029C	YHL030W	SYNONYMOUS_CODING	0	0	0	0	0	0	0	0	0	0	0	0	0	0	0	0	0	0	0	0	0	0	0	0	0	0	0	0	0	0	0	0	0	0	0	0	0	0	0	0
chrVIII	45929	A	T	10	1	YHL028W	YHL030W	YHL029C	STOP_LOST	0	0	0	0	0	0	10	0	0	0	0	0	0	0	0	0	0	0	0	0	0	0	0	0	0	0	0	0	0	0	0	0	0	0	0	0	0	0	0	0
chrVIII	47663	T	C	10	1	YHL028W	YHL030W	YHL029C	NON_SYNONYMOUS_CODING	0	0	0	0	0	0	0	0	0	0	0	0	0	0	0	0	0	0	0	0	0	0	0	0	0	0	0	0	0	0	0	0	0	0	0	0	0	0	0	0
chrVIII	48022	C	T	0.9363	1	YHL029C	YHL030W	NONE	NONE	0	0	0	0	0	0.0048	0	0	0	0	0	0	0	0	0	0	0	0	0	0	0	0	0	0	0	0	0	0	0	0	0.9363	0	0	0	0	0	0	0	0	0
chrVIII	53899	C	A	10	1	YHL025W	YHL027W	YHL026C	NON_SYNONYMOUS_CODING	0	0	0	0.0272	0	0	0	0	0	0	0	0	0	0	0	0	0	0	0	0	0	0	0	0	0	0	0	0	0	0	0	0	0	0	0	0	0	0	0	0
chrVIII	55747	T	C	10	1	YHL024W	YHL027W	YHL025W	NON_SYNONYMOUS_CODING	0	0	0	0	0	0	0	0	0	0	0	0	0	0	0	0	0	0	0	0	0.0112	0	0	0	0	0	0	0	0	0	0	0	0	0	0	0.0072	0	0	0	0
chrVIII	56400	G	A	10	1	YHL024W	YHL025W	NONE	NONE	0	0	0	0	0	0	0	0	0	0	0	0	0	0	0	0	0	0	0	0	0	0	0	0	0	0	0	0	0	0	0	0	0	0	0	0	0	0	0	0
chrVIII	60392	C	G	0.9928	1	tH(GUG)H	YHL024W	YHL023C	NON_SYNONYMOUS_CODING	0	0	0	0	0	0	0	0	0	0	0	0	0	0	0	0	0	0	0	0	0	0	0	0	0	0	0	0	0	0	0	0	0	0	0	0.9928	0.0068	0	0	0
chrVIII	62737	C	T	0.9481	1	tH(GUG)H	YHL022C	NONE	NONE	0	0	0	0	0.0114	0	0	0	0	0	0	0	0	0.9481	0	0	0	0	0	0	0	0	0	0	0	0	0	0	0	0	0	0	0	0	0	0	0	0	0	0
chrVIII	62779	C	A	10	1	YHL023C	YHL022C	tH(GUG)H	EXON	0	0	0.0064	0	0	0	0	0	0	0	0	0	0	0	0	0	0	0	0	0	0	0	0	0	0	0	0	0	0	0	0	0	0	0	0	10	0	0	0	0
chrVIII	65658	C	G	0.9932	1	YHL022C	YHL020C	YHL021C	NON_SYNONYMOUS_CODING	0	0	0	0	0	0	0	0	0	0	0	0	0	0	0	0	0	0	0	0	0	0.9932	0	0	0	0	0	0	0	0	0	0	0	0	0	0	0	0	0	0
chrVIII	66979	A	T	10	1	YHL019W-A	YHL019C	YHL020C	NON_SYNONYMOUS_CODING	0	0	0	0	0	0	0	0	0	0	0	0	0	0	0	0	0	0	0	0	0	0	0	0	0	0	0	0	0	0	0	0	0	0	0	0	0	0	0	0
chrVIII	71312	A	T	10	1	YHL019C	YHL016C	YHL017W	NON_SYNONYMOUS_CODING	0	0	0	0	0	0	0	0	0	0	0	0	0	0	0	0	0	0	0	0	0	0	0	0	0	0	0	0	10	0	0	0	0.0041	0	0	0	0	0	0	0
chrVIII	79934	G	T	10	1	YHL013C	YHL011C	YHL012W	STOP_GAINED	0	0	0	0	0	0	0	0	10	0	0.004	0	0	0	0	0.004	0	0	0	0	0	0	0	0	0	0	0	0	0	0	0.0045	0.0089	0	0	0	0	0	0	0	0
chrVIII	119753	C	T	0.9924	1	tT(AGU)H	YHR006W	NONE	NONE	0	0	0	0	0	0	0	0	0	0	0	0	0	0	0	0	0	0	0	0	0	0	0	0	0	0	0	0	0	0	0	0	0	0	0	0	0	0	0	0
chrVIII	129730	A	T	10	1	YHR014W	YHR011W	YHR012W	NON_SYNONYMOUS_CODING	0	0	0	0	0	0	0	0	0	0	0	0	0	0	0	0	10	0	0	0	0	0	0	0	0	0	0	0	0	0	0	0	0	0	0	0	0	0	0	0
chrVIII	145026	T	C	10	1	YHR019C	tA(AGC)H	YHR020W	SYNONYMOUS_CODING	0	0	0	0	0	0	0	0	0	0	0	0	0	0	0	0	0	0	0	0	0	0	0	0	0	0	0	0	0	0	0	0	0	0	0	10	0	0	0	0
chrVIII	146291	G	C	10	1	YHR019C	YHR020W	tA(AGC)H	EXON	0	0	0	0	0	0	0	0	0	0	0	0	0	0	0	0	0	0	0	0	0	0	0	0	0	0	0	0	0	0	0	0	0	0	0	0	0	0	0	0
chrVIII	148440	C	T	0.9364	1	YHR021W-A	YHR022C	YHR021C	INTRON	0	0	0	0	0	0	0	0	0	0	0	0	0	0	0	0	0	0	0	0	0	0	0	0	0	0	0	0	0	0	0	0	0	0	0	0	0	0	0	0
chrVIII	156169	A	C	10	1	YHR025W	YHR024C	YHR023W	NON_SYNONYMOUS_CODING	0	0	0	0	0	0	0	0	0	0	0	10	0	0	0	0	0	0	0	0	0	0	0	0	0	0	0	0	0	0	0	0	0	0	0	0	0	0	0	0
chrVIII	156931	A	T	10	1	YHR025W	YHR024C	YHR023W	NON_SYNONYMOUS_CODING	0	0	0	0	0	0	10	0	0	0	0	0	0	0	0	0	0	0	0	0	0	0	0	0	0	0	0	0	0	0	0	0	0	0	0	0	0	0	0	0
chrVIII	166827	T	C	10	1	YHR028W-A	YHR029C	YHR028C	NON_SYNONYMOUS_CODING	0	0	0	0	0	0	0	0	0	0	0	0	0	0	0	0	0	0	0	0	0	0	0	0	10	0	0	0	0	0	0	0	0	0	0	0	0	0	0	0
chrVIII	173551	C	A	0.9492	1	YHR031C	YHR032C-A	YHR032W	STOP_GAINED	0	0	0	0	0	0	0	0	0	0	0	0	0	0.9492	0	0	0	0	0	0	0.0084	0	0	0	0	0	0	0	0	0	0	0	0	0	0	0.0046	0	0	0	0.008
chrVIII	173574	C	G	10	1	YHR031C	YHR032C-A	YHR032W	NON_SYNONYMOUS_CODING	0	0	0	0	0	0	0	10	0	0	0	0	0	0	0	0	0	0	0	0	0	0	0	0	0	0	0	0	0	0	0	0.0075	0	0	0	0	0	0	0	0
chrVIII	174705	C	G	0.9921	1	YHR032W-A	YHR032C-A	YHR032W	NON_SYNONYMOUS_CODING	0	0	0	0	0	0	0	0	0	0.9921	0	0	0	0	0	0	0	0	0	0	0	0	0	0	0	0	0	0	0	0	0	0	0	0	0	0	0	0	0	0
chrVIII	175770	C	T	0.9474	1	YHR032C-A	YHR032W-A	YHR033W	NON_SYNONYMOUS_CODING	0	0	0	0.0091	0	0	0	0	0	0	0	0	0	0.9474	0	0	0	0	0	0	0	0	0	0	0	0	0	0	0	0	0	0	0	0	0	0	0	0	0	0
chrVIII	178025	C	A	0.9613	1	YHR034C	YHR033W	NONE	NONE	0	0	0	0	0	0	0	0	0	0	0	0.0066	0	0	0	0	0	0	0	0	0	0	0	0	0	0	0	0	0	0	0.9613	0	0	0	0	0	0	0	0	0
chrVIII	196140	G	A	0.9956	1	YHR044C	YHR046C	YHR045W	STOP_GAINED	0	0	0	0	0	0	0	0	0	0	0	0	0	0	0	0	0	0	0	0	0	0	0	0	0	0	0	0	0	0	0	0	0	0	0	0	0.9956	0	0	0
chrVIII	197571	C	A	0.9902	1	YHR044C	YHR045W	YHR046C	NON_SYNONYMOUS_CODING	0	0	0	0	0	0	0	0	0	0	0	0	0	0	0.005	0	0	0	0	0	0	0	0	0	0	0	0	0	0	0	0	0	0	0	0	0	0	0	0	0
chrVIII	203230	A	G	10	1	YHR048W	YHR049C-A	NONE	NONE	0	0	0	10	0	0	0	0	0	0	0	0	0	0	0	0	0	0	0	0	0	0	0	0	0	0	0	0	0	0	0	0	0	0	0	0	0	0	0	0.0088
chrVIII	206758	C	G	10	1	YHR050W	YHR049C-A	YHR049W	NON_SYNONYMOUS_CODING	0	0	0	0	0	0	0	0	0	0	0	0	0	0	0	0	0	0	0	0	0	0	0	0	0	0	0	0	0	0	0	0	0	0	0	0	0	0	0	0
chrVIII	216910	G	T	10	1	YHR056W-A	YHR057C	YHR056C	NON_SYNONYMOUS_CODING	0	0	0	0	0	0	0	0	0.0063	0	0	0	0	0	0	0	0	0	0	0	0	0	0	0	0	0	0	0	0	0	0	0	0	0	0.0075	0	0	0	0	0
chrVIII	217040	A	G	10	1	YHR056W-A	YHR057C	YHR056C	NON_SYNONYMOUS_CODING	0	0	0	0	0	0	0	0	0	0	0	0	0	0	0	0	0	0	0	0	0	0	0	0	0	0	0	0	0	0	0	0	0	0	0	0	0	0	0	0
chrVIII	219179	G	T	10	1	YHR057C	YHR056W-A	YHR058C	SYNONYMOUS_CODING	0	0	0	0	0	0	0	0	0	0	0	0.019	0	0	0	0	0	0	0	0	0	0	0	0	0	0	0	0	0	0	0	0	0	0	0	0	0	0	0	0
chrVIII	236059	A	T	10	1	YHR069C-A	YHR070C-A	YHR070W	NON_SYNONYMOUS_CODING	0	0	0	0	0	0	0	0	0	0	0	10	0	0	0	0	0	0	0	0	0	0	0	0	0	0	0	0	0	0	0	0	0	0	0	0	0	0	0	0
chrVIII	236579	G	T	10	1	YHR070C-A	YHR070W	NONE	NONE	0	0	0	0	0	0	0	0	0	0	0	0	0	0	0	0	0	0	0	0	0	0	0	0	0	0	0	0	0	0	0	0	0	0	10	0	0	0	0	0
chrVIII	251214	C	A	10	1	YHR075C	YHR077C	YHR076W	INTRON	0	0	0	0	0	0	0	0	0	0	0	0	0	0	0	0	0	0	0	0	0	0	0	0	0	0	0	0	0	0	0	0	0	0	0	0	0	0	0	0
chrVIII	255044	G	C	10	1	YHR078W	YHR076W	YHR077C	NON_SYNONYMOUS_CODING	0	0	10	0	0	0	0	0	0	0	0	0	0	0	0	0	0	0	0	0	0	0	0	0	0	0	0	0	0	0	0	0	0	0	0	0	0	0	0	0
chrVIII	255151	T	A	10	1	YHR078W	YHR076W	YHR077C	NON_SYNONYMOUS_CODING	0	0	0	0	0	0	0	0	0	0	0	0	0	0	10	0	0	0	0	0	0	0	0	0	0	0	0	0	0	0	0	0	0	0	0	0	0	0	0	0
chrVIII	255533	G	T	10	1	YHR078W	YHR079C	YHR077C	NON_SYNONYMOUS_CODING	0	0	0	0	0	0	0	0	0	0	0	0	0	0	10	0	0	0	0	0	0	0	0	0	0	0	0	0	0	0	0	0	0	0	0	0	0	0	0	0
chrVIII	255585	C	A	10	1	YHR078W	YHR079C	YHR077C	STOP_GAINED	0	0	0	0	0	0	0	0	0	0	0	0	0	0	0	0	0	0	0	0	0	0	0	0	0	0	0.0089	0	0.0134	0	0	0	10	0.0102	0	0	0	0	0	0
chrVIII	257203	G	T	0.9923	1	YHR077C	YHR079C	YHR078W	NON_SYNONYMOUS_CODING	0	0	0	0	0	0	0	0	0	0	0	0	0	0	0	0	0	0	0	0	0	0	0	0	0	0	0	0	0	0	0	0	0	0	0	0	0	0	0	0
chrVIII	271192	T	A	10	1	YHR083W	YHR081W	YHR082C	NON_SYNONYMOUS_CODING	0	0	0	0	10	0	0	0	0	0	0.005	0	0	0	0	0	0	0	0	0	0	0	0	0	0	0	0	0	0	0	0	0	0	0	0	0	0	0	0	0
chrVIII	271417	G	A	0.9939	1	YHR083W	YHR081W	YHR082C	NON_SYNONYMOUS_CODING	0	0	0	0	0	0	0	0	0	0	0	0	0	0	0	0	0	0	0	0	0	0	0	0	0	0	0	0	0	0	0	0	0	0	0	0	0	0	0	0
chrVIII	274070	C	G	0.9938	1	YHR084W	YHR083W	NONE	NONE	0	0	0	0	0	0	0	0	0	0	0	0	0	0	0	0	0	0	0	0	0	0	0	0	0	0	0	0	0	0	0	0	0	0	0	0	0	0	0	0
chrVIII	275370	G	T	0.9877	1	YHR085W	YHR083W	YHR084W	NON_SYNONYMOUS_CODING	0	0	0	0	0	0	0	0	0	0	0.9877	0	0	0	0	0	0	0	0	0	0	0	0	0	0	0	0	0	0	0	0	0	0	0	0	0	0	0	0	0
chrVIII	281649	A	G	10	1	NONE	YHR087W	YHR088W	SYNONYMOUS_CODING	0	0	0	0	0	0	0	0	0	0	0	0	0	0	0	0	0	0	0	0	0	0	0	0	0	0	0	0	0	0	0	0	0	0	0	0	0	0.0065	0	0
chrVIII	291714	G	C	10	1	YHR095W	YHR093W	YHR094C	SYNONYMOUS_CODING	0	0	0	0	0	0	0	0	0	0	0	0	0	0	0	0	0	0	0	0	0	0	0	0	0	0	0	0	0	0	0	0	0	0	0	0	0	0	0	0
chrVIII	292140	C	T	0.9762	1	YHR095W	YHR093W	YHR094C	SYNONYMOUS_CODING	0	0	0	0	0	0	0	0	0	0.0052	0	0	0	0	0	0	0	0	0	0	0	0	0	0	0	0	0	0	0	0	0	0	0	0	0	0	0	0	0	0
chrVIII	292146	T	A	0.9643	1	YHR095W	YHR093W	YHR094C	SYNONYMOUS_CODING	0	0	0	0	0	0	0	0	0	0	0	0	0	0	0	0	0	0	0	0	0	0	0	0	0	0	0	0	0	0	0	0	0	0	0	0	0	0	0	0
chrVIII	292152	A	G	0.9545	1	YHR095W	YHR093W	YHR094C	SYNONYMOUS_CODING	0	0	0	0	0	0	0	0	0	0	0	0	0	0	0	0	0	0	0	0	0	0	0	0	0	0	0	0	0	0	0	0	0	0	0	0	0	0	0	0
chrVIII	292263	A	G	0.9833	1	YHR095W	YHR096C	YHR094C	SYNONYMOUS_CODING	0	0	0	0	0	0	0	0	0	0	0	0	0	0	0	0	0	0	0	0	0	0	0	0	0	0	0	0	0	0	0	0.006	0	0	0	0	0	0	0	0
chrVIII	292269	A	G	0.9857	1	YHR095W	YHR096C	YHR094C	SYNONYMOUS_CODING	0	0	0	0	0	0	0	0	0	0	0	0	0	0	0	0	0	0	0	0	0	0	0	0	0	0	0	0	0	0	0	0.0061	0	0	0	0	0	0	0	0
chrVIII	293245	T	C	0.6575	0	YHR094C	YHR096C	YHR095W	SYNONYMOUS_CODING	0	0.0185	0	0	0	0	0	0	0	0	0	0	0	0	0	0	0	0	0	0	0	0	0	0	0	0	0	0	0	0	0	0	0	0	0	0	0	0	0	0
chrVIII	302134	G	T	0.9927	1	YHR098C	NONE	NONE	NONE	0	0.0115	0	0	0	0	0	0	0	0	0	0	0	0	0	0	0	0	0	0	0	0	0	0	0	0	0	0	0	0	0	0	0	0	0	0	0	0	0	0
chrVIII	302795	C	G	0.9912	1	YHR098C	NONE	YHR099W	NON_SYNONYMOUS_CODING	0	0	0	0	0	0	0	0	0	0	0	0	0	0	0	0	0	0	0	0	0	0	0	0	0	0	0	0	0	0	0	0	0	0	0	0	0	0	0	0
chrVIII	303564	G	A	0.9912	1	YHR098C	NONE	YHR099W	SYNONYMOUS_CODING	0	0	0	0	0	0	0	0	0	0	0	0	0	0	0	0	0	0	0	0	0	0	0	0.9912	0	0	0	0	0	0	0	0	0	0	0	0	0	0	0	0
chrVIII	303745	T	C	0.994	1	YHR098C	NONE	YHR099W	SYNONYMOUS_CODING	0	0	0	0	0	0	0	0	0	0	0	0	0	0	0	0	0	0.994	0	0	0	0	0	0	0	0	0	0	0	0	0	0	0	0	0	0	0	0	0	0
chrVIII	303920	C	T	0.9857	1	YHR098C	NONE	YHR099W	NON_SYNONYMOUS_CODING	0	0.9857	0	0	0	0	0	0	0	0	0	0	0	0	0	0	0	0	0	0	0	0	0	0	0	0	0	0	0	0	0.024	0	0	0	0	0	0	0	0	0
chrVIII	305373	T	C	10	1	YHR098C	NONE	YHR099W	SYNONYMOUS_CODING	0	0	0	10	0	0	0	0	0	0	0	0	0	0	0	0	0	0	0	0	0	0	0	0	0	0	0	0	0	0	0	0	0	0	0	0	0	0	0	0
chrVIII	307505	A	T	0.9941	1	NONE	NONE	YHR099W	NON_SYNONYMOUS_CODING	0	0	0.9941	0	0	0	0	0	0	0	0	0	0	0	0	0	0	0	0	0	0	0	0	0	0	0	0	0	0	0	0	0	0	0	0	0	0	0	0	0
chrVIII	316072	G	C	10	1	YHR101C	YHR099W	NONE	NONE	0	0	10	0	0	0	0	0	0	0.0051	0	0	0	0	0	0	0	0	0	0	0	0	0	0	0	0	0	0	0	0	0	0	0	0	0	0	0	0	0	0
chrVIII	319396	A	G	0.9919	2	YHR103W	NONE	YHR102W	NON_SYNONYMOUS_CODING	0	0	0	0	0	0	0	0	0	0	0	0	0	0	0	0	0	0	0	0	0	0	0	0	0	0	0	0	0	0	0	0	0	0	0	0	0	0	0	0
chrVIII	329653	A	G	10	1	YHR109W	YHR106W	YHR108W	NON_SYNONYMOUS_CODING	0	0	0	0	0	0	0	0	0	0	0	0	0	0	0	0	0	0	0	0	0	0	0	0	0	0	0	0	0	0	0	0	0	0	0	0	0	0	0	0
chrVIII	331040	A	G	0.9548	1	YHR110W	YHR108W	YHR109W	NON_SYNONYMOUS_CODING	0	0	0	0	0	0	0	0	0	0	0	0	0	0.9548	0	0	0	0	0	0	0	0	0	0	0	0	0	0	0	0	0	0	0	0	0	0	0	0	0	0
chrVIII	332554	T	C	0.995	1	YHR111W	YHR109W	YHR110W	SYNONYMOUS_CODING	0	0	0	0	0	0	0	0	0	0	0	0	0	0	0	0	0	0	0	0	0	0	0	0	0.995	0	0	0	0	0	0	0	0	0	0	0	0	0	0	0
chrVIII	334445	T	C	10	1	YHR113W	YHR111W	NONE	NONE	0	0.0083	0	0	0	0	0	0	10	0	0	0	0	0	0	0.0049	0	0	0	0	0	0	0	0	0	0	0	0	0	0	0	0	0	0	0	0	0	0	0	0
chrVIII	344485	G	T	0.9943	1	YHR119W	YHR117W	YHR118C	NON_SYNONYMOUS_CODING	0	0	0.006	0	0	0	0	0	0	0	0	0	0	0	0	0	0	0	0	0	0	0	0	0	0	0	0	0	0	0	0	0	0	0	0	0	0	0	0.0066	0
chrVIII	358525	C	A	0.9844	1	YHR125W	YHR124W	tF(GAA)H2	INTRON	0	0	0	0.0072	0	0	0	0	0	0	0	0	0	0	0	0	0	0	0	0	0	0	0	0	0	0	0	0	0	0	0	0	0	0	0	0	0	0	0	0.0093
chrVIII	359019	A	T	10	1	tF(GAA)H2	YHR124W	YHR125W	SYNONYMOUS_CODING	0	0	0	0	0	0	0	0	0	0	0	0	0	0	0	0	0	0	0	0	0	0	0	0	0	0	0	0	0	0	0	0	0	0	0	0	0	0	0	0
chrVIII	373266	A	G	0.9918	1	YHR133C	YHR134W	YHR135C	NON_SYNONYMOUS_CODING	0	0	0	0	0.9918	0	0	0	0	0	0	0	0	0	0	0	0	0	0	0	0	0	0	0	0	0	0	0	0	0	0	0	0	0	0	0	0	0	0	0
chrVIII	373782	C	T	0.9942	1	YHR137W	YHR136C	YHR135C	NON_SYNONYMOUS_CODING	0	0	0	0	0	0	0	0	0.9942	0	0	0	0	0	0	0	0	0	0	0	0	0	0	0	0	0	0	0	0	0	0	0	0	0	0	0	0	0	0	0
chrVIII	374398	A	T	10	1	YHR135C	YHR136C	NONE	NONE	0	0	0	0	0	0	0	0	0	0	0	0	0	0	0	0	0	0	0	0	0	0	0	0	0	0	0	0	0	0	0	0	0	0	0	0	0	0	0	0
chrVIII	375119	T	C	10	1	YHR136C	YHR137C-A	NONE	NONE	0	0	0	0	0	0	0	0	0	0	0	0.01	0	0	0	0	0	0	0	0	0	0	0	0	0	0	0	0	0	0	0	0	0	0	10	0	0	0	0	0
chrVIII	376488	A	T	10	1	YHR137C-A	YHR138C	YHR137W	NON_SYNONYMOUS_CODING	0	0	0	0	0	0	0	0	0	0	0	0	0	0	0	0	0	10	0	0	0	0	0	0	0	0	0	0	0	0	0	0	0	0	0	0	0	0	0	0
chrVIII	383477	A	T	10	1	YHR142W	snR32	NONE	NONE	0	0	0	0	10	0	0	0	0	0	0	0	0	0	0	0	0	0	0	0	0	0	0	0	0	0	0	0	0	0	0	0	0	0	0	0	0	0	0	0
chrVIII	388965	C	G	0.9873	1	YHR144C	YHR145C	tP(UGG)H	EXON	0	0	0	0	0	0	0	0	0	0	0	0	0	0	0	0	0	0	0	0	0	0	0	0	0	0	0	0	0	0	0	0	0	0.9873	0	0	0	0	0	0
chrVIII	391211	G	C	0.9818	1	YHR145C	YHR147C	YHR146W	SYNONYMOUS_CODING	0	0	0	0	0	0	0	0	0	0	0	0	0	0	0	0	0	0	0	0	0	0	0	0	0	0	0	0	0	0	0	0	0	0	0	0	0	0	0	0
chrVIII	393972	C	T	10	1	YHR147C	YHR149C	YHR148W	NON_SYNONYMOUS_CODING	0	0	0	0	0	10	0	0	0	0	0	0	0	0	0	0	0	0	0	0	0	0	0	0	0	0	0	0	0	0	0	0	0	0	0	0	0	0	0	0
chrVIII	394168	A	G	0.9923	1	YHR147C	YHR148W	NONE	NONE	0	0	0	0	0	0	0.9923	0	0	0	0	0	0	0	0	0	0	0	0	0	0	0	0	0	0	0	0	0	0	0	0	0	0	0	0	0	0	0	0	0
chrVIII	394482	A	G	10	1	YHR147C	YHR148W	YHR149C	SYNONYMOUS_CODING	0	0	0	0	0	0	0	0	0	0	0	0	0	0	0	0	0	0	0	0	0	0	0	0	0	0	0	0	0	0	0	0	0	0	0	0	0	0	0	0
chrVIII	396328	A	G	10	1	YHR150W	YHR148W	YHR149C	NON_SYNONYMOUS_CODING	0	0	0	0	0	0	0	0	0	0	0	0	0	0	0	0	0	0	0	0	0	0	0	0	0	0	0	0	0	0	0	0	0	0	0	0	0	0	0	0
chrVIII	397248	C	A	10	1	YHR150W	YHR151C	NONE	NONE	0	0	0	0	0	0	0	0	0	0	0	0	0	0	0	0.0108	0	0	0	0	0	0	0	0	0	0	0	0	0	0	0	0	0	0	0	0	0	0	0	0
chrVIII	399914	G	A	10	1	YHR152W	YHR150W	YHR151C	NON_SYNONYMOUS_CODING	0	0	0	0	0	0	0	0	0	0	0	0	0	0	0	0	0	0	0	0	0	0	10	0	0	0	0	0	0	0	0	0	0	0	0	0	0	0	0	0
chrVIII	404520	C	T	10	1	YHR153C	YHR152W	YHR154W	STOP_GAINED	0	0	0	0	0	0	0	0	0	0	0	0	0	0	0	0	0	0	0	0	0	0	0	0	0	0	0	0	0	0.014	0	0	0	0	0	0	0	0	0	0
chrVIII	407036	T	C	10	1	YHR155W	YHR154W	NONE	NONE	0	0	0	0	0	0	0	0	0	10	0	0	0	0	0	0	0.0066	0	0	0	0	0	0	0	0	0	0	0	0	0	0	0	0	0	0	0	0	0	0	0
chrVIII	414043	T	C	10	1	YHR156C	YHR157W	YHR158C	NON_SYNONYMOUS_CODING	0	0	0	0	0	10	0	0	0	0	0	0	0	0	0	0	0	0	0	0	0	0	0	0	0	0	0	0	0	0	0	0	0	0	0	0	0	0	0	0
chrVIII	421378	T	A	10	1	YHR160C	YHR159W	YHR161C	NON_SYNONYMOUS_CODING	0	0	0	0	0	0	0	0.0061	10	0	0	0	0	0	0	0	0	0	0	0	0	0	0	0	0	0	0	0	0	0	0	0	0	0	0	0	0	0	0	0
chrVIII	423448	T	C	10	1	YHR163W	YHR164C	YHR162W	NON_SYNONYMOUS_CODING	0	0	0	0	0	0	0	0	0	0	0	0	0	0	0	0	0	0	0	0	0	0	0	0	0	0	0	0	0	0	0	0	0	0	0	0	0	0	0	0
chrVIII	434779	T	C	10	1	YHR165W-A	YHR166C	YHR165C	SYNONYMOUS_CODING	0	0	0	0	0	0	0	0	0	0	0	0	0	0	0	0	0	0	0	0	0	0	0.0059	0	0	0	0	0	0	0	0	0	0	0	0	0	0	0	0	0
chrVIII	435235	A	G	0.9947	1	YHR165W-A	YHR166C	YHR165C	SYNONYMOUS_CODING	0	0	0	0	0	0.9947	0	0	0	0	0	0	0	0	0	0	0	0	0	0	0	0	0	0	0	0	0	0	0	0	0	0	0	0	0	0	0	0	0	0
chrVIII	444757	C	G	10	1	YHR171W	YHR169W	YHR170W	NON_SYNONYMOUS_CODING	0	0	0	0	0	0	0	0	0	0	0	0	0	0	0	0	0	0	0	0	0	0	0	0	0	0	0	0	0	0	0	0	0	0	0	0	0	0	0	0
chrVIII	452496	T	C	10	1	YHR175W	YHR172W	YHR174W	SYNONYMOUS_CODING	0	0	0	0	0	0.0042	0	0	0	0	0	0	0.0065	0	0	10	0	0	0.0059	0	0	0	0	0	0	0	0	0	0	0	0	0	0	0	0	0	0	0	0	0
chrVIII	454143	A	G	0.9957	1	YHR176W	YHR175W-A	NONE	NONE	0	0	0	0	0	0	0	0	0	0	0	0	0	0	0	0	0	0	0	0	0	0	0	0	0	0	0	0	0	0	0	0	0	0	0	0	0	0	0	0
chrVIII	456137	C	G	10	1	YHR177W	YHR176W	NONE	NONE	0	0	0	0	0	0	0	0	0	0	0	0	0	0	0	0	0	0	0	0	0	0	0	0	0	0	0	0	0	0	0	0	0	0	0	0	0	0	0	0
chrVIII	457931	A	G	10	1	YHR178W	YHR176W	YHR177W	SYNONYMOUS_CODING	0	0	0	0	0	0.0042	0	0	0	0	0	0	0	0	0	0	0	0	0	0	0	0	0	0	0	0	0	0	0	0	0	0	0	0	0	0	0	0	0	0
chrVIII	471773	T	A	0.9536	1	YHR182C-A	YHR182W	YHR183W	NON_SYNONYMOUS_CODING	0	0	0	0	0	0	0	0	0	0	0	0	0	0	0	0	0	0	0	0	0	0	0	0	0	0	0	0	0	0	0	0	0	0	0	0	0	0	0	0
chrVIII	472171	T	A	10	1	YHR184W	YHR182W	YHR183W	SYNONYMOUS_CODING	0	0	0	0	0	0	0	0	0	0	0	0	0	0	0	0	0	0	0	0	0	0	0	0	0	0	0	0	0	0	0	0	0	0	0	0	0	0	0	0
chrVIII	473710	C	T	10	1	YHR182C-A	YHR185C	YHR184W	STOP_GAINED	0	0	0	0	0	0	0	0	0	0	0	0	0	0	0	0	0	0	0	0	0	0	0	0	0	0	0	0	0	0	0	0	0	0	0	0	0	0	0	0
chrVIII	474842	A	G	0.9939	1	YHR182C-A	YHR184W	YHR185C	NON_SYNONYMOUS_CODING	0	0	0	0	0	0	0	0	0	0	0	0	0	0	0	0	0	0	0	0	0	0	0	0	0	0	0	0	0	0	0	0	0	0	0	0	0	0	0	0
chrVIII	477112	T	A	10	1	tV(CAC)H	YHR184W	YHR186C	SYNONYMOUS_CODING	0	0	0	0	0	0	0	0	0	0	0	0	0	0	0	0	0.0072	0	0	0	0	0	0	0	0	0	0	0	0	0	0	0	0	0	0	0	0	0	0	0
chrVIII	492074	G	T	0.9937	1	YHR197W	YHR195W	YHR196W	SYNONYMOUS_CODING	0	0	0	0	0	0.0043	0	0	0	0	0	0	0	0	0	0	0	0	0.0054	0	0	0	0	0	0	0	0.0038	0	0	0.9937	0.0047	0	0	0	0	0	0	0	0	0
chrVIII	494131	C	T	10	1	YHR200W	YHR196W	YHR197W	NON_SYNONYMOUS_CODING	0	0	0	0	0	0	0	0	0	0	0	0	0	0	0	0	0	0	0	0	0	0	0.0059	0	0	0	0	0	0	0	0	0	0	0	0	0	0	0	0	0
chrVIII	494857	T	C	10	1	YHR200W	YHR196W	YHR197W	NON_SYNONYMOUS_CODING	0	0	0	0	0	0	0	0	0	0	0	0	0	0	0	0	0	0	0	0	0	0	0	0	0	0	0	0	0	0	0	0	0	0	0	0	0	0	0	0
chrVIII	498646	A	T	0.9948	1	YHR199C	YHR201C	YHR199C-A	SYNONYMOUS_CODING	0	0	0	0	0	0	0	0	0	0	0	0	0	0	0	0	0	0	0	0	0	0	0	0	0	0	0	0	0	0	0	0	0	0	0	0	0	0	0	0
chrVIII	503531	C	A	0.453	0	YHR201C	YHR203C	YHR202W	NON_SYNONYMOUS_CODING	0.0034	0	0	0	0	0	0	0	0	0	0	0	0	0	0	0.0032	0	0	0	0	0	0	0	0.453	0	0	0.0125	0	0	0	0	0	0	0	0	0	0	0	0.0056	0
chrVIII	503930	A	G	0.9946	1	YHR204W	YHR203C	YHR202W	NON_SYNONYMOUS_CODING	0	0	0	0	0.0066	0	0	0.0058	0	0	0	0	0	0	0	0.9946	0	0	0	0	0	0	0	0	0	0	0	0	0	0	0	0	0	0	0	0	0	0	0	0
chrVIII	505105	T	G	10	1	YHR204W	YHR202W	YHR203C	NON_SYNONYMOUS_CODING	0	0	0	0	0	0	0	0	0	0	0	0	0	0	0	0	0	0	0	0	0	0	0	0	0	0	0	0	0	0	0	0	0	0	0	0	0	0	0	0
chrVIII	505940	G	C	0.9922	1	YHR204W	YHR202W	NONE	NONE	0	0	0	0	0	0	0	0	0	0	0	0	0	0	0	0.0116	0	0	0.0076	0	0	0	0	0	0	0	0	0	0	0.9922	0	0	0	0	0	0	0	0	0	0
chrVIII	510063	A	G	0.9565	1	YHR206W	YHR204W	YHR205W	NON_SYNONYMOUS_CODING	0	0	0	0	0	0	0	0	0	0	0	0	0	0	0	0	0	0	0	0	0	0	0	0	0	0	0	0	0	0	0	0	0	0	0	0	0	0	0	0
chrVIII	511791	A	G	10	1	YHR206W	YHR204W	YHR205W	NON_SYNONYMOUS_CODING	0	0	0	0	0	0	0	0	0	0	0	0	0	0	0	0	0	0	0	0	0	0	0	0	0	0	0	0	0	0	0	0	0	0	0	0	0	0	0	0
chrVIII	512808	C	T	10	1	YHR208W	YHR205W	YHR206W	NON_SYNONYMOUS_CODING	0	0	0	0	0	0	0	0	0	0	0	0	0	0	0	0	0	0	0	0	0	0	0	0	0	0	0	0	0	0	0	0	0	0	0	0	0	0	0	0
chrVIII	516296	T	C	10	1	YHR208W	YHR206W	YHR207C	NON_SYNONYMOUS_CODING	0	0	0	0	0	0	0	0	0	0	0	0	0	0	0	0	0	0	0	0	0	0	0	0	0	10	0	0	0	0	0	0	0	0	0	0	0	0	0	0
chrVIII	519577	T	C	10	1	YHR207C	YHR208W	YHR209W	SYNONYMOUS_CODING	0	0	0	0	0	0	0	0	0	0	0	0	0	0	0	0	0	0	0	0	0	0	0	0	0	0.0068	0	0	0	0	0	0	0	0	0	0	0	0	0	0
chrVIII	523798	C	G	10	1	YHR211W	YHR209W	NONE	NONE	0	0	0	0	0	0	0	0	0	0	0	0	0	0	0	0	0	0	0	0	0	0	0	0	0	0	0	0	0	0	0	0	0	0	10	0	0	0	0	0
chrVIII	525415	A	T	0.9947	1	YHR210C	NONE	YHR211W	SYNONYMOUS_CODING	0	0	0	0	0	0	0	0	0	0	0	0	0	0	0	0	0	0	0	0	0	0	0	0	0	0	0	0	0	0	0	0	0	0	0	0	0	0	0	0
chrVIII	530045	A	T	10	1	NONE	YHR211W	NONE	NONE	0	0	0	0	0	0	0	0	0	10	0	0	0	0	0	0	0	0	0	0	0	0	0	0	0	0	0	0	0	0	0	0	0	0	0	0	0	0	0	0
chrVIII	531037	A	G	0.8619	1	NONE	YHR211W	NONE	NONE	0	0	0	0	0.0067	0	0	0	0	0	0	0.8619	0	0	0	0	0	0	0	0	0	0	0	0	0	0	0	0	0	0	0	0	0	0	0	0	0	0	0	0
chrVIII	541534	C	G	0.4545	0	YHR214W	YHR213W-B	NONE	NONE	0	0	0	0	0	0	0	0	0	0	0	0	0	0	0	0	0	0	0	0	0	0	0	0	0	0	0	0.4545	0	0	0	0.2698	0	0	0	0	0	0	0	0
chrVIII	541933	C	T	0.5233	0	YHR214W-A	YHR213W-B	YHR214W	NON_SYNONYMOUS_CODING	0	0	0	0	0	0	0	0	0	0	0	0	0	0	0	0	0	0	0	0	0	0	0	0	0	0	0	0	0	0	0	0	0	0	0	0	0	0	0	0
chrVIII	551815	A	T	0.44	0	YHR215W	YHR217C	NONE	NONE	0	0	0	0	0	0	0	0	0	0	0	0	0	0	0	0	0	0	0	0	0	0	0	0	0	0	0	0	0	0	0	0	0	0	0	0	0	0	0	0
chrVIII	554576	A	C	0.4859	0	YHR214C-E	YHR215W	YHR216W	NON_SYNONYMOUS_CODING	0	0.0045	0	0	0	0	0	0	0	0	0	0	0	0.4859	0	0	0	0	0	0	0	0	0	0	0	0	0	0	0	0	0	0	0	0	0	0	0	0	0	0
chrVIII	555453	A	G	0.4049	0	YHR218W	YHR217C	YHR216W	NON_SYNONYMOUS_CODING	0.0028	0	0	0	0	0	0	0	0	0	0	0	0	0	0	0	0	0	0.4049	0	0	0	0	0	0	0	0	0	0	0	0	0	0	0	0	0	0	0	0	0
chrVIII	555494	G	T	0.4713	0	YHR218W	YHR217C	YHR216W	NON_SYNONYMOUS_CODING	0	0	0	0	0	0	0.0062	0.0029	0	0	0	0	0	0	0	0	0	0	0.0035	0	0	0	0	0	0	0	0	0	0	0	0	0	0.0028	0	0	0	0	0.0031	0	0.4713
chrIX	23888	T	C	10	1	NONE	YIL170W	YIL169C	NON_SYNONYMOUS_CODING	0	0	0	0	0	0	0	0	0	0	0	0	0	0	0	0	0	0	0	0	0	0	0	0	0	0	0	0	0	0	0	0	0	0	10	0	0	0	0	0
chrIX	24483	T	C	0.9952	1	YIL168W	YIL170W	YIL169C	NON_SYNONYMOUS_CODING	0	0	0	0	0	0	0.9952	0	0	0	0	0	0	0	0	0	0	0	0	0	0	0	0	0	0	0	0	0	0	0	0	0	0	0	0	0	0	0	0	0
chrIX	25714	A	T	0.7925	1	YIL168W	YIL170W	YIL169C	SYNONYMOUS_CODING	0	0	0	0	0	0	0	0	0	0	0	0	0	0	0	0	0	0	0	0	0	0	0	0	0	0	0	0	0	0	0	0	0	0	0	0	0	0	0	0
chrIX	26157	G	C	10	1	YIL169C	YIL166C	NONE	NONE	0	10	0	0	0	0.0048	0	0	0	0	0	0	0	0	0	0	0	0	0	0	0	0	0	0	0	0	0	0	0	0	0.0383	0	0	0	0	0	0	0	0	0
chrIX	31346	T	A	10	1	NONE	YIL167W	YIL166C	NON_SYNONYMOUS_CODING	0	0	0	0	0	0	0	0	0	0	0	0	0	0	0	0	0	0	0	0	0	0	10	0	0	0	0	0	0	0	0	0	0	0	0	0	0	0	0	0
chrIX	37428	C	A	10	1	YIL163C	YIL160C	YIL162W	NON_SYNONYMOUS_CODING	0	10	0	0	0	0	0	0	0	0	0	0	0	0	0	0	0	0	0	0	0.0067	0	0	0	0	0	0	0	0	0	0.0356	0	0	0	0.0063	0.0042	0	0	0	0
chrIX	41669	T	C	0.9934	1	YIL159W	YIL161W	NONE	NONE	0	0	0	0	0	0.9934	0	0	0	0	0	0	0	0	0	0	0	0	0	0	0	0	0	0	0	0	0	0	0	0	0	0	0	0	0	0	0	0	0	0
chrIX	42925	A	G	10	1	YIL160C	YIL161W	YIL159W	NON_SYNONYMOUS_CODING	0	0	0	0	0	0	0	0	0	0	0	0	0	0	0	0	0	0	0	0	0	0	0	0	0	0	0	0	0	0	0	0	0	0	0	0	0	0	0	0
chrIX	43588	A	G	10	1	YIL160C	YIL157C	YIL159W	SYNONYMOUS_CODING	0	0	0	0	0	0	0	0	0	0	0	0.0068	0	0	0	0	0	10	0	0	0	0	0	0	0	0	0	0	0	0	0	0	0	0	0	0	0	0	0	0
chrIX	45610	C	A	10	1	YIL158W	YIL157C	YIL159W	SYNONYMOUS_CODING	0	0	0	0	0	0	0	0	0.0056	0	0	0	10	0.0264	0	0	0	0	0	0	0	0	0	0	0	0	0	0.0043	0	0	0	0	0	0	0	0	0	0	0	0
chrIX	52477	A	T	10	1	YIL153W	YIL156W	YIL155C	NON_SYNONYMOUS_CODING	0	0	0	0	0	0	0	0	0	10	0	0	0	0	0	0	0	0	0	0	0	0	0	0	0	0	0	0	0	0	0	0	0	0	0	0	0	0	0	0
chrIX	54957	G	C	0.6316	0	YIL153W	YIL151C	YIL154C	NON_SYNONYMOUS_CODING	0	0	0	0	0	0	0	0	0	0	0	0	0	0	0	0	0	0	0	0	0	0	0	0	0	0	0	0	0	0	0	0	0	0	0	0	0	0	0	0
chrIX	60878	C	T	10	1	YIL151C	YIL150C	NONE	NONE	0	0	0	0	0	0	0	0	0	0	0	0	0	0	0	0	0	0	0	0	0	0	0	0	0	0	0	0	0	0	0	0	0	0	0	0	0	0	0	0
chrIX	65522	T	A	10	1	YIL150C	YIL147C	YIL149C	NON_SYNONYMOUS_CODING	0	0	0	0	0	0	0	0	0	0	0	0	0	0	0	0	0	0	0	0	0	0	0	10	0	0	0	0	0	0	0	0	0	0	0	0	0	0	0	0
chrIX	65800	C	T	10	1	YIL148W	YIL147C	YIL149C	SYNONYMOUS_CODING	0	0	0	0	0	0	0	0	0	0	0	0	0	0	0	0	0	0	0	0	0	0	0	0	0	0	0	0	0	0	0	0	0	0	0	0	0	0	0	0
chrIX	66887	T	C	10	1	YIL148W	YIL147C	YIL149C	NON_SYNONYMOUS_CODING	0	0	0	0	10	0	0	0	0	0	0	0	0	0	0	0	0	0	0	0	0	0	0	0	0	0	0	0	0	0	0	0	0	0	0	0	0	0	0	0
chrIX	78185	A	G	0.988	1	YIL145C	YIL143C	YIL144W	NON_SYNONYMOUS_CODING	0	0	0	0	0	0	0	0	0	0	0	0	0	0	0	0	0	0	0	0	0	0	0	0	0	0	0	0	0	0	0	0	0	0	0	0	0	0	0	0
chrIX	82470	T	C	10	1	YIL142W	YIL142C-A	YIL143C	NON_SYNONYMOUS_CODING	0	10	0	0	0	0	0	0	0	0	0	0	0	0	0	0	0	0	0	0	0	0	0	0	0	0	0	0	0	0	0.0553	0	0	0	0	0	0	0	0	0
chrIX	97730	A	G	10	1	YIL134C-A	snR68	YIL134W	SYNONYMOUS_CODING	0	0	0	0	0	0	0	0	0	0	0	0	0	0	0	0	0	0	0	0	0	0	0	0	0	0	0	0	0	0	0	0	0	0	0	0	0	0	0	0
chrIX	100883	G	A	10	1	YIL132C	YIL134W	YIL131C	SYNONYMOUS_CODING	0	0	0	0	0	0.007	0	0	0	10	0	0	0	0	0	0	0.0088	0	0	0	0	0	0	0	0	0	0	0	0	0	0	0	0	0	0	0	0	0	0	0
chrIX	105882	C	A	0.989	1	YIL131C	YIL130W	NONE	NONE	0	0	0	0	0	0	0	0	0	0	0	0	0	0	0	0	0	0	0	0	0	0	0	0	0	0	0	0	0.989	0	0	0	0	0	0.0097	0	0	0	0	0
chrIX	110112	T	C	10	1	YIL128W	YIL130W	YIL129C	SYNONYMOUS_CODING	0	0	0	0	0	0	0	0	0	0	0	0	0	0	0	0	0	0	0	0	0	0	0	0	0	0	0	0	0	0	0	0	0	0	0	0	0	0	0	0
chrIX	125065	T	C	0.9963	1	YIL124W	YIL126W	YIL125W	SYNONYMOUS_CODING	0	0	0	0	0	0	0	0	0	0	0	0	0	0	0.9963	0	0	0	0	0	0	0	0	0	0	0	0	0	0	0	0	0	0	0	0	0	0	0	0	0
chrIX	138392	A	T	10	1	YIL119C	YIL117C	NONE	NONE	0	0	0	0	0	0	0	0	0	0	0	0	0	0	0	0	0	0	0	0	0	0	0	0	0	0	0	0	0	0	0	0	0	0	10	0	0	0	0	0
chrIX	140570	C	G	10	1	YIL116W	YIL117C	NONE	NONE	0	0	0	0	0	0	0	0	0	0	0	0	10	0.0492	0	0	0	0	0	0	0	0	0	0	0	0	0	0	0	0	0	0	0	0	0	0	0	0	0	0
chrIX	143621	G	A	10	1	YIL115W-A	YIL115C	YIL116W	NON_SYNONYMOUS_CODING	0	0	0	0	0	0	0	0	0	0	0	0	0	0	0	0	0	0	0	0	0	0	0	0	0	0	0	0	0	0	0	0	0	0	0	0	0	0	0	0
chrIX	144439	G	C	10	1	YIL117C	YIL116W	YIL115W-A	NON_SYNONYMOUS_CODING	0	0	0	10	0	0	0	0	0	0	0	0	0	0.005	0	0	0	0	0	0	0	0	0	0	0	0	0	0	0	0	0	0	0	0	0	0	0	0	0	0
chrIX	146811	A	G	0.9903	1	YIL113W	YIL115W-A	YIL115C	SYNONYMOUS_CODING	0	0	0	0	0	0	0	0	0	0	0	0	0	0	0	0	0	0	0	0	0	0	0	0	0	0	0.0054	0	0	0	0	0	0	0	0	0.9903	0	0	0	0
chrIX	158003	A	T	10	1	YIL108W	YIL110W	YIL109C	NON_SYNONYMOUS_CODING	0	0	0	0	0	0	0	0	0	0	0	0	0	0	0	0	0	0	10	0	0	0	0	0	0	0	0	0	0	0	0	0	0	0	0	0	0	0	0	0
chrIX	160970	C	G	0.9853	1	YIL109C	YIL107C	YIL108W	NON_SYNONYMOUS_CODING	0	0	0	0	0	0	0.0049	0	0	0	0	0	0	0	0	0	0	0	0.9853	0	0	0	0	0	0	0	0	0	0	0	0	0	0	0	0	0	0	0	0	0
chrIX	161316	C	T	10	1	YIL109C	YIL107C	YIL108W	STOP_GAINED	0	0	0	0	0	0	0	0	0	0	0	0	0	0	0	0	0	0	0	0	0	0	0	0	0	0	0	0	0	0	0	0	0	0	0	10	0	0	0	0
chrIX	162565	T	C	10	1	YIL109C	YIL107C	YIL108W	NON_SYNONYMOUS_CODING	0	0	0	0	0	0	0	0	0	0	0	0	0	0	0	0	0	0	0	0	0	0	0	0	0	0	0	0	0	0	0	0	0	0	0	0	0	0	0	0
chrIX	162669	A	T	10	2	YIL109C	YIL107C	YIL108W	STOP_GAINED	0	0	0	0	0	0	0	0	0	0	0	0	0	0	0	0	0	0	0	0	0	0	0	0	0	0	0	0	0	0	0	0	0	0	0	0	0	0	0	0
chrIX	169588	C	G	10	1	YIL103W	YIL104C	YIL105C	NON_SYNONYMOUS_CODING	0	0	0	0	0	0	0	0	0	0	0	0	0	0	0	0	0	0	0	0	0	0	0	0	0	0	0	0	0	0	0	0	0	0	0	0	0	0	0	0
chrIX	173800	C	A	10	1	YIL102C-A	YIL103W	NONE	NONE	0	0	0	0	0	0	0	0	0	0	0	0	0	0	0	0	0	0	0	0	0	0	0	0	0	0	0	0	0	0	0	0	0	0	0	0	0	0	0	0
chrIX	176146	G	A	10	1	YIL100W	tT(AGU)I1	YIL101C	SYNONYMOUS_CODING	0	0	0	0	0	0	0	0	0	0	0	0	0	0	0	0	0	0	0	0	0	0	0	0	0	0	0	0	0	0	0	0	0	0	0	0	0	0	0	0
chrIX	184396	A	G	10	1	tI(AAU)I1	YIL094C	YIL095W	NON_SYNONYMOUS_CODING	0	0	0	0	0	0	0	0	0	0	0	0	0	0	0	0	0	0	0	0	0	0	0	0	0	0	0	0	0	0	0	0	0	0	0	0	0	0	0	0
chrIX	187278	C	A	10	1	YIL092W	YIL093C	YIL094C	NON_SYNONYMOUS_CODING	0.0076	0	0	0.0047	0	0.0044	0.0096	0	0	0	0	10	0	0	0	0	0	0	0	0	0	0	0	0	0	0	0.0046	0	0	0	0	0	0	0	0	0	0	0	0	0
chrIX	187279	C	A	10	1	YIL092W	YIL093C	YIL094C	NON_SYNONYMOUS_CODING	0	0	0	0	0	0	0.0098	0	0	0	0	10	0	0	0	0	0	0	0	0	0	0	0	0	0	0	0	0	0	0.0061	0	0	0	0	0	0.0051	0	0	0	0
chrIX	197039	A	G	0.9934	1	tE(CUC)I	YIL089W	NONE	NONE	0	0	0	0	0	0	0	0	0	0	0	0	0	0	0	0	0	0	0	0	0	0	0	0	0	0	0	0	0	0	0	0	0	0	0	0	0	0	0	0
chrIX	200279	G	A	10	1	YIL087C	YIL085C	YIL086C	SYNONYMOUS_CODING	0	0	0	0	0	0	0	0	0	0	0	0	0	0	0	0	0	0	0	0	0	0	0	0	0	0	0	0	0	0	0	0	0	0	0	0	0	0	0	0
chrIX	202357	T	C	10	1	YIL085C	YIL083C	YIL084C	SYNONYMOUS_CODING	0	0	0	0	0	0	0.0136	0.0069	10	0	0	0	0	0	0	0	0	0	0	0	0	0	0	0	0	0	0	0	0	0	0	0	0	0	0	0	0	0	0	0
chrIX	211334	G	A	0.9769	1	YIL078W	tI(AAU)I2	YIL079C	SYNONYMOUS_CODING	0	0	0	0	0	0	0	0	0	0	0	0	0	0.9769	0	0	0	0	0	0	0	0	0	0	0	0	0	0	0	0	0	0	0	0	0	0	0	0	0	0
chrIX	215242	C	G	10	1	YIL076W	YIL078W	YIL077C	NON_SYNONYMOUS_CODING	0	0	0	0	0	0	0	0	0	0	0	0	0	0	0	0	0	0	0	0	0	0	0	0	0	0	0	0	0	0	0	0	0	0	0	10	0	0	0	0
chrIX	221270	G	C	0.9914	1	YIL075C	YIL073C	YIL074C	NON_SYNONYMOUS_CODING	0	0	0	0	0	0	0	0	0	0	0	0	0	0	0	0	0	0	0	0	0	0	0	0	0	0	0	0	0	0	0	0	0	0	0	0	0	0	0	0
chrIX	225914	G	A	10	1	YIL072W	YIL071C	YIL073C	NON_SYNONYMOUS_CODING	0	0	0	0	0	0	0	0	0	0	0	0	10	0.0248	0	0	0	0	0	0	0	0	0	0	0	0	0	0	0	0	0	0	0	0	0	0	0	0	0	0
chrIX	238986	T	G	10	1	YIL067C	YIL066W-A	YIL066C	NON_SYNONYMOUS_CODING	0	0	0	0	0	0	0	0	0	0	0	0	0	0	0	0	0	0	0	0	0	0	0	0	0	0	0	0	0	0	0	0	0	0	0	0	0	0	0	0
chrIX	239718	G	C	0.9797	1	YIL067C	YIL065C	YIL066C	NON_SYNONYMOUS_CODING	0	0	0	0	0	0	0.0054	0	0	0	0	0	0	0	0	0	0	0	0	0	0	0	0	0	0	0	0	0	0	0	0	0	0	0	0	0	0	0	0	0
chrIX	240850	A	G	10	1	YIL066C	YIL065C	NONE	NONE	0	0	0	0	0	0	0	0	0	0	0	0	0	0	0	0	0	0	0	0	0	0	0	0	0	0	0	0	0	0	0	0	0	0	0	0	0	0	10	0
chrIX	243829	G	C	10	1	YIL063C	YIL062C	NONE	NONE	0	0	0	0	0	0	0	0	0	0	0	0	0	0	0	0	0	0	0	0	0	0	0	0	0	0	0	0	0	0	0	0	0	0	0.0074	0	0	0	0	0
chrIX	244438	T	C	10	1	YIL063C	YIL061C	YIL062C	NON_SYNONYMOUS_CODING	0	0	0	0	0	0	0	0	0	0	0	10	0	0	0	0	0	0	0	0	0	0	0	0	0	0	0	0	0	0	0	0	0	0	0	0	0	0	0	0
chrIX	256411	C	G	0.9932	1	YIL055C	YIL053W	YIL052C	NON_SYNONYMOUS_CODING	0	0	0	0	0	0	0	0	0	0	0	0	0	0	0	0	0	0	0	0	0	0	0	0	0	0	0	0	0	0.9932	0	0	0	0	0	0	0	0	0	0
chrIX	256806	T	C	0.4013	0	YIL050W	YIL053W	YIL052C	INTRON	0	0	0	0	0	0.0042	0	0	0	0	0	0	0	0	0	0	0	0	0	0	0.0071	0	0	0	0	0	0	0	0	0	0	0	0	0	0	0	0	0	0	0
chrIX	259288	A	G	10	1	YIL049W	YIL053W	YIL050W	NON_SYNONYMOUS_CODING	0	0	0	0	0	0	0	0	0	0	0	0	0	0	0	0	0	0	0	0	0	0	0	0	0	0	0	0	0	0	0	0	0	0	0	10	0	0	0	0
chrIX	259786	T	C	10	1	YIL049W	YIL050W	NONE	NONE	0	0	0	0	0	0	0	0	0	0	0	0	0	0	0	0	0	0	0	0	0	0	0	0	10	0	0	0	0	0	0	0	0	0	0	0	0	0	0	0
chrIX	260758	T	C	10	1	YIL048W	YIL050W	YIL049W	NON_SYNONYMOUS_CODING	0	0	10	0.0049	0	0	0	0	0	0	0	0.0097	0	0	0	0	0	0	0	0	0	0	0	0	0	0	0	0	0	0	0	0	0	0	0	0	0	0	0	0
chrIX	263164	C	G	0.9912	1	YIL051C	YIL047C-A	YIL048W	NON_SYNONYMOUS_CODING	0	0	0	0	0	0	0	0	0	0	0	0	0	0	0	0	0	0	0	0	0	0	0	0	0	0	0	0	0	0	0	0	0	0	0	0	0.9912	0.0047	0	0
chrIX	264416	A	G	10	1	YIL046W-A	YIL047C-A	YIL048W	NON_SYNONYMOUS_CODING	0	0	0	0	0	0	0	0	0	0	0	0	0	0	0	0	0	0	0	0	0	0	10	0	0	0	0	0	0	0	0	0	0	0	0	0	0	0	0	0
chrIX	264531	T	A	10	1	YIL046W-A	YIL047C-A	YIL048W	SYNONYMOUS_CODING	0	0	0	0	0	0	0	0	0	0	0	0	0	0	0	0	10	0	0	0	0	0	0	0	0	0	0	0	0	0	0	0	0	0	0	0	0	0	0	0
chrIX	266535	T	C	10	1	YIL047C-A	YIL048W	YIL047C	NON_SYNONYMOUS_CODING	0	0	0	0	10	0	0	0	0	0	0	0	0	0	0	0	0	0	0	0	0	0	0	0	0	0	0	0	0	0	0	0	0	0	0	0	0	0	0	0
chrIX	271040	A	T	10	1	YIL045W	YIL046W	NONE	NONE	0	0	0	0	0	0	0	0	0	0	0	0	0	0	0	0	0	0	0	0	0	0	0	0	0	0	0	0	0	0	0	0	0.0072	0	0	0	0	0	0	0
chrIX	282412	G	C	10	1	YIL036W	YIL037C	YIL038C	STOP_GAINED	0	0	0	0	0	0	0	0	0	0	0	0	0	0	0	0	0	0	0	0	0	0	0	0	0	0	0	0	0	0	0	0	0	0	0	0	0	0	0	0
chrIX	298425	A	G	0.9949	1	YIL029W-A	tK(CUU)I	YIL030C	SYNONYMOUS_CODING	0	0	0	0	0	0	0	0	0	0	0	0	0	0	0	0	0	0	0	0	0	0	0	0	0	0	0	0	0	0	0	0	0	0	0	0	0	0	0	0
chrIX	298959	T	C	10	1	YIL029W-A	tK(CUU)I	YIL030C	SYNONYMOUS_CODING	0	0	0	0	0	0	0	0	0	0	10	0	0	0	0	0	0	0	0	0	0	0	0	0	0	0	0	0	0	0	0	0	0	0	0	0	0	0	0	0
chrIX	299296	C	A	0.9909	1	YIL029W-A	tK(CUU)I	YIL030C	NON_SYNONYMOUS_CODING	0	0	0	0	0	0	0	0	0	0	0	0	0	0	0	0	0	0	0	0	0	0	0	0	0	0	0	0	0	0	0	0	0.9909	0	0	0	0	0	0	0
chrIX	308701	T	A	10	1	YIL025C	YIL023C	YIL024C	NON_SYNONYMOUS_CODING	0	0	0	0	0	0	0	0	0	0	0	0	0	0	0	0	0	0	0	0	0	0	0	0	0	0	0	0	0	0	0	0	0	0	0	0	0	0	0	0
chrIX	313751	G	T	10	1	YIL021C-A	YIL020C	YIL021W	NON_SYNONYMOUS_CODING	0	0	0	0	0	0	0	0.0049	0	10	0	0	0	0	0	0	0	0	0	0	0	0	0	0	0	0	0	0	0	0	0	0.0093	0	0	0	0	0	0	0	0.0066
chrIX	316707	C	A	10	1	YIL018W	YIL019W	NONE	NONE	0	0	0	0	0	0	0	0	0	0	0	0	0	0	0	0	0	0	0	0	0	0	0	0	0	0	0	0	0	10	0	0	0	0	0	0	0	0	0	0
chrIX	320635	A	C	10	1	YIL016W	YIL018W	YIL017C	NON_SYNONYMOUS_CODING	0	0	0	0	0	0	0	0	0	0	0	0	0	0	0	0	0	0	0	0	0	0	0	0	0	0	0	0	0	0	0	0	0	0	0	0	0	0	0	0
chrIX	327628	A	G	10	1	YIL014C-A	YIL013C	YIL014W	NON_SYNONYMOUS_CODING	0	0	0	0	0	0	0	0	0	0	0	0.0057	0	0	0	0	0	0	0	0	0	0	0	0	0	0	0	0	0	0	0	0	0	0	0	0	0	0	0	0
chrIX	331542	A	G	0.9952	1	YIL012W	YIL014W	YIL013C	NON_SYNONYMOUS_CODING	0	0	0	0	0	0	0	0	0	0	0	0	0	0	0	0	0	0	0	0	0	0	0	0	0	0	0	0	0	0	0	0	0	0	0	0	0	0	0	0
chrIX	334413	A	G	0.9612	1	YIL010W	YIL012W	YIL011W	SYNONYMOUS_CODING	0	0	0	0	0	0	0	0	0	0	0	0	0	0	0	0	0	0	0	0	0	0	0	0	0	0	0	0	0	0	0.9612	0	0	0	0	0	0	0	0	0.0079
chrIX	334981	A	G	10	1	YIL013C	YIL011W	YIL010W	NON_SYNONYMOUS_CODING	0	0	0	0	0	0	0	0	0	0	10	0	0	0	0	0.005	0	0	0	0	0	0	0	0	0	0	0	0	0	0	0	0	0	0	0	0	0	0	0	0
chrIX	342694	C	G	0.9828	1	YIL006W	YIL007C	YIL008W	NON_SYNONYMOUS_CODING	0	0	0	0	0	0	0	0	0	0	0	0	0	0	0	0	0.0068	0	0	0	0	0	0	0	0	0	0	0	0	0.9828	0	0	0	0	0	0	0	0	0	0
chrIX	360517	G	T	10	1	YIR002C	YIR006C	NONE	NONE	0	0	0	0	0	0	0	0	0	0	0	0	0.0051	0	0	0	0	0	0	0	0	0	0	0	0.0048	0	0	0	0	0	0	0	0	0	0	0	0	0	0	0
chrIX	363210	C	A	10	1	YIR004W	YIR003W	NONE	NONE	0	0	0	0	0	0	0	0	0	0	0	0	0	0	0	0	0	0	0	0	0	0.0065	0	0	0	0	0	0	0	0	0	0	0	0	0	0	0	0	0	0
chrIX	363471	C	A	0.9946	1	YIR005W	YIR003W	YIR004W	NON_SYNONYMOUS_CODING	0	0	0	0	0	0	0	0	0	0	0	0	0	0	0	0	0	0	0	0	0	0	0	0	0	0	0	0	0	0	0	0	0	0	0	0	0	0	0	0
chrIX	370463	G	C	10	1	YIR007W	YIR008C	tE(UUC)I	EXON	0	0	0	0	0	0	0	0	0.0097	0	0	0	0	0	0	0.0058	0	0	0	0	0	0	0	0	0	0	0	0	0	0	0	0	0	0	0	0	0	0	0	0
chrIX	374271	G	T	10	1	YIR009W	YIR007W	YIR008C	NON_SYNONYMOUS_CODING	0	0	0	0	0	0	0	0	0	0	0	0	0	0	0	0	0	0	0	0	0	0	0	0	0	0	0	0	0	0	0	0	0.0068	0	0.0072	0	0	0	0	0
chrIX	375698	A	T	0.7448	1	YIR008C	YIR009W	YIR010W	NON_SYNONYMOUS_CODING	0	0	0	0	0	0	0	0	0	0	0	0	0	0	0	0	0	0	0	0	0	0	0	0	0	0	0	0	0	0	0	0	0	0.0055	0	0	0	0	0	0
chrIX	379523	C	A	10	1	YIR011C	YIR013C	YIR012W	NON_SYNONYMOUS_CODING	0	0	0	0	0	0	0	0	0	0	0	0	0	0	0	0	0	0	0	0	0	0	0	0	0	0	0	0	0	0	0	0	0	0	0	0	0	0	0	0
chrIX	379703	C	T	0.9902	1	YIR014W	YIR013C	YIR012W	SYNONYMOUS_CODING	0	0	0	0	0	0	0	0	0	0	0	0	0	0	0.0051	0	0	0	0	0	0	0	0	0	0	0	0	0	0	0	0	0	0	0	0	0	0	0	0	0
chrIX	386459	G	A	10	1	YIR018C-A	YIR018W	NONE	NONE	0	0	0	0	0	0	0	0	0	0	0	0	0	0	0	0	0	0	0	0	0	0	0	0	0	0	0	0	0	0	0	0	0	0	0	0	0	0	0	0
chrIX	390014	G	T	10	1	YIR018C-A	ICR1	YIR019C	NON_SYNONYMOUS_CODING	0	0	0	0	0	0	0	0	0	0	0	0	0	0	0	0	0	0	0	0	0.009	0	0	0	0	0	0	0	0	0	0	0	0	0	0	0	0	0	0	0
chrIX	391708	G	A	10	1	YIR020W-A	ICR1	YIR019C	SYNONYMOUS_CODING	0	0.0069	0	0	0.0043	0	0	0	0	0	0	0	0	0.0043	0	0	0.0061	0	0	0.0071	0	0	0	0.0061	0	0.0052	0	0	0.0062	0	0	0	0.0062	0	0	0	0	0	0	0
chrIX	393589	T	G	10	1	YIR020W-A	ICR1	YIR019C	SYNONYMOUS_CODING	0	0	0	0.0048	0	0	0	0	0	0	0	0	0	0	0	0	0	0	0	0	0	0	0	10	0	0	0	0	0	0	0	0	0	0	0	0	0	0	0	0
chrIX	406384	G	C	10	1	YIR026C	YIR025W	YIR027C	NON_SYNONYMOUS_CODING	0	0	0	0	0	10	0	0	0	0	0	0	0	0	0	0	0	0	0	0	0	0	0	0	0	0	0	0	0	0	0	0	0	0	0	0	0	0	0	0
chrIX	410714	A	T	10	1	YIR029W	YIR028W	NONE	NONE	0	0	0	0	0	0	0	0	0	0	0	0	0	0	0	0	0	0	0	0	0	0	0	0	0	0	0	0	0	0	0	0	0	0	0	0	0	0	0	0
chrIX	413540	T	C	10	1	YIR030C	YIR030W-A	YIR031C	SYNONYMOUS_CODING	0	0	0	0	0	0	0	0	0	0	0	0	0	0	0	0	0	0	0	0	0	0	0	0	0	0	0	0	0	0	0	0	0	0	0	0	0	0	0	0
chrIX	418637	C	G	0.9892	1	YIR032C	YIR034C	YIR033W	SYNONYMOUS_CODING	0	0	0	0	0	0	0	0	0	0	0	0	0	0	0	0	0	0	0.9892	0	0	0	0	0	0	0	0	0	0	0	0	0	0	0	0	0	0	0	0	0
chrIX	425579	C	T	0.9925	1	YIR038C	YIR037W	NONE	NONE	0	0	0	0	0	0	0	0	0	0	0	0	0	0	0	0	0	0	0.9925	0	0	0	0	0	0	0	0	0	0	0	0	0	0	0	0	0	0	0	0	0
chrIX	427083	G	C	10	1	YIR038C	YIR039C	NONE	NONE	0	0	0	0	0	0	0	0	0	0	0	0	0	0	0	0	0	0	0	0	0	0	0	0	0	0	0	0	0	0	0	0	0	0	0	0	0	0	0	0
chrIX	427255	C	A	0.975	1	YIR038C	YIR039C	NONE	NONE	0	0	0	0	0	0	0	0	0	0	0	0	0	0	0	0	0	0	0	0	0	0	0	0	0	0	0	0	0	0	0	0	0.0055	0	0	0	0	0	0	0
chrIX	428976	G	T	10	1	YIR038C	YIR039C	NONE	NONE	0	0	0	0	0	0	0	0	0	0	0	0	0	0	0	0	0	0	0	0	0	0	0	0	0	0	0	0	0	0	0	0	0	0	0	0	0	0	0	0
chrIX	430380	G	C	10	1	YIR041W	YIR039C	NONE	NONE	0	0	0	0	0.0055	0	0	0	0	0	0	0	0	0	0	0	0	0	0	0	0	0	0	0	0	0	0.0041	0	0	0	0	0	0	0	0	0	0	0	10	0
chrIX	432544	G	T	0.8811	1	YIR039C	YIR040C	NONE	NONE	0	0	0	0	0.8811	0	0	0	0	0	0	0	0	0	0	0	0	0	0.0063	0	0	0	0	0	0	0	0.0045	0	0	0	0	0	0	0.004	0	0	0	0	0	0
chrIX	436082	A	G	10	1	YIR042C	YIR043C	NONE	NONE	0	0	0	0	0	0	0	0	0	0	0	0	0	0	0	0	0	0	0	0	0	0	0	0	0	0	0	0	0	0	0	0	0	0	0	0	0	0	0	0
chrIX	438346	C	T	10	1	YIR044C	YIR041W	NONE	NONE	0	0	0	0	0	0	0	0	0	0	0	0	0	0	0.0075	0	0	0	0	0	0	0	0	0	0	0	10	0	0	0	0	0	0	0	0	0	0	0	0	0
chrX	21836	C	T	10	1	YJL218W	YJL219W	NONE	NONE	0	0	0	0	0	0	0	0	0	0	0	0	0	0	0	0	0	0	0	0	0	0	0	0	0	0	0	0	0	0	0	0	0	0	0	0	0	0	0	0
chrX	22216	T	C	10	1	YJL217W	YJL219W	YJL218W	NON_SYNONYMOUS_CODING	0	0	0	0	0	0	0	0	0	0	0	0	0	0.006	0	0	0	0	0	0	0	0	0	0	0	0	0	0	0	0	0	0	0	0	0	0	0	0	0	0
chrX	22903	T	C	0.9927	1	YJL217W	YJL218W	NONE	NONE	0	0	0	0	0	0	0	0	0	0	0	0	0	0	0	0	0	0	0	0	0	0	0	0	0	0	0	0	0	0.9927	0	0	0	0	0	0	0	0	0	0
chrX	31299	A	G	10	1	YJL213W	YJL212C	NONE	NONE	0	0	0	0	0	0	0	0	0	0	0	0	0	0	0	0	0	0	0	0	0	0	0	0	10	0	0	0	0	0	0	0	0	0	0	0	0	0	0	0
chrX	31374	A	G	10	1	YJL213W	YJL212C	NONE	NONE	0	0	0	0	0	0	0	0	0	0	0	0	0	0	0	0	0	0	0	0	0	0	0	0	0	0	0	0	0	0	0	0	0	0	0	0	0	0	0	0
chrX	32809	A	T	10	1	YJL210W	YJL212C	YJL213W	NON_SYNONYMOUS_CODING	0	0	0	0	0	0	0	0	0	0	0	0	0	0	0	0	0	0	0	0	0	0	0	0	0	0	0	0	0	0	0	0	0	0	0	0	0	0	0	0
chrX	36297	G	C	10	1	YJL212C	YJL211C	NONE	NONE	0	0	0	0	0	0	0	0	0	0	0	0	0	0	0	0	0	0	0	0	0	0	0	0	0	0	0	0	0	0	0	0	0	0	0	10	0	0	0	0
chrX	45022	A	G	10	1	YJL208C	YJL206C	YJL207C	SYNONYMOUS_CODING	0	0	0	0	0	0	0	0	0	0	0	0	0	0	0	0	0	0	0	0	0	0	0	0	0	0	0	0	0	0	0	0	0	0	0	0	0	0	0	0
chrX	46102	T	C	10	1	YJL208C	YJL206C	YJL207C	SYNONYMOUS_CODING	0	0	0	0	0	0	0	0	0	0	0	0	0	0	0	0	0	0	0	0	0.0138	0	0	0	0	0	0	0	0	0	0	0	0	0	0	0	0	0	0	0
chrX	48866	C	A	0.9944	1	YJL207C	YJL205C	YJL206C	NON_SYNONYMOUS_CODING	0	0	0	0	0	0	0	0	0	0	0	0	0	0.0047	0	0	0	0	0	0	0	0	0	0	0	0	0	0	0	0	0	0	0	0	0.0062	0	0	0	0	0
chrX	53526	T	G	0.9597	1	YJL204C	YJL202C	YJL203W	SYNONYMOUS_CODING	0	0	0	0	0	0	0	0	0	0	0	0	0	0.9597	0	0	0	0	0	0	0	0.0083	0	0	0.0078	0	0	0	0	0	0	0	0	0	0	0	0	0	0.0076	0
chrX	55607	C	G	0.9945	1	YJL202C	YJL200C	YJL201W	NON_SYNONYMOUS_CODING	0	0	0	0	0	0	0	0	0	0.9945	0	0	0	0	0	0	0	0	0	0	0	0	0	0	0	0	0	0	0	0	0	0	0	0	0	0	0	0	0	0
chrX	61242	G	A	0.984	1	YJL199C	YJL197C-A	YJL198W	NON_SYNONYMOUS_CODING	0	0	0	0	0	0	0	0	0	0	0	0	0	0	0	0	0	0	0	0	0	0	0	0	0	0	0	0	0	0	0	0	0	0	0	0	0	0	0	0
chrX	66880	C	G	10	1	YJL197C-A	YJL196C	YJL197W	NON_SYNONYMOUS_CODING	0	0	0	0	0	0	0	0	0	0	0	0	0	0	0	0	0	0	0	0	0	0	0	0	0	0	0	0	0	0	0	0	0	0	0	0	0	0	0	0
chrX	66883	C	T	10	1	YJL197C-A	YJL196C	YJL197W	NON_SYNONYMOUS_CODING	0	0	0	0	0	0	0.0053	0	0	0	0	0	0	0	0	0	0	0	0	0	0	0	0	0	0	0	0	0	0	0	0	0	0	0	0	0	0	0	0	0
chrX	69052	G	A	10	1	YJL196C	YJL195C	NONE	NONE	0	0	0	0	0	0	0	0	0	0	0	0	0	0	0	0	0	0	0	0	0	0	0	0	0	0	0	0	0	0	0	0	0	0	0	0	0	0	0	0
chrX	69056	T	A	10	1	YJL196C	YJL195C	NONE	NONE	0	0	0	0	0	0	0	0	0	0	0	0	0	0	0	0	0	0	0	0	0	0	0	0	0	0	0	0	0	0	0	0	0	0	0	0	0	0	0	0
chrX	73820	T	C	0.8939	1	YJL192C	YJL190C	YJL191W	INTRON	0	0	0	0	0	0	0	0	0	0	0	0	0	0	0	0	0	0	0.8939	0	0	0	0	0	0	0	0	0	0	0	0	0	0	0	0	0	0	0	0	0
chrX	74355	C	G	0.9937	1	YJL192C	YJL190C	YJL191W	NON_SYNONYMOUS_CODING	0	0	0	0	0	0	0	0	0	0	0.0065	0	0	0	0	0	0	0	0	0	0	0	0	0	0	0	0	0	0	0	0	0	0	0	0	0	0	0	0	0
chrX	74986	T	C	10	1	YJL189W	YJL191W	YJL190C	NON_SYNONYMOUS_CODING	0	0	0	0	0	0	0	0	0	0	0	0	0	0	0	0	0	0	0	0	0	0	0	0	0	0	0	0	0	0	0	0	0	0	0	0	0	0	0	0
chrX	78440	A	G	0.9913	1	YJL186W	YJL189W	YJL187C	SYNONYMOUS_CODING	0	0	0	0	0	0	0	0	0	0	0	0	0	0	0	0	0	0	0	0	0	0	0	0.0056	0	0	0	0	0	0	0	0	0	0	0	0	0	0	0	0
chrX	79248	T	C	0.6087	0	YJL186W	YJL189W	YJL187C	NON_SYNONYMOUS_CODING	0	0	0	0	0	0	0	0	0	0	0	0	0	0	0	0	0	0	0	0	0.6087	0	0	0	0	0	0	0	0	0	0	0	0	0	0	0	0	0	0	0
chrX	86257	T	A	10	1	YJL182C	YJL183W	YJL181W	SYNONYMOUS_CODING	0	0	0	0	0	0	0	0	0	0	0	0	0	0	0	0	10	0	0	0	0	0	0	0	0	0	0	0	0	0	0	0	0	0	0	0	0	0	0	0
chrX	89770	G	A	0.995	1	YJL177W	YJL179W	YJL178C	NON_SYNONYMOUS_CODING	0	0	0	0	0	0	0	0	0	0	0	0	0	0	0	0	0	0	0	0	0	0	0	0	0	0	0	0	0	0	0	0	0	0	0	0	0	0	0	0
chrX	92932	G	C	10	1	YJL175W	YJL177W	YJL176C	NON_SYNONYMOUS_CODING	0	0	0	0	0	0	0	0	0	0	0	0	0	0	0	0	0	0	0	0	0	0	0	0	0	0	0	0	0	0	0	0	0	0	0	0	0	0	0	0
chrX	93811	G	A	10	1	YJL175W	YJL177W	YJL176C	NON_SYNONYMOUS_CODING	0	0	0	0	0	0	0	0	0	0	0	10	0	0	0	0	0	0	0	0	0	0	0	0	0	0	0	0	0	0	0	0	0	0	0	0	0	0	0	0
chrX	102052	G	T	10	1	YJL169W	YJL168C	NONE	NONE	0	0	0	0	0	0	0	0	0	0	0	0	0	0	0	0	0	0	0	0	0	0.0134	0	0	0	0	0	0	0	0	0	0	0	0	0	0	0	0.0051	0.0051	0
chrX	108235	C	A	0.9886	1	YJL168C	YJL166W	YJL165C	SYNONYMOUS_CODING	0	0	0	0	0	0	0.005	0	0	0	0	0	0	0.0047	0	0	0	0	0.9886	0	0	0	0	0	0	0	0	0	0	0.0064	0	0	0.0062	0	0	0	0	0	0	0
chrX	109128	A	G	10	1	YJL168C	YJL164C	YJL165C	NON_SYNONYMOUS_CODING	0	0	0	0	0	0	0	0	0	0	0	0	0	0	0	0	0	0	0	0	0	0	0	0	0	0	0	0	0	0	0	0	0	0	0	10	0	0	0	0
chrX	109547	T	C	10	1	YJL165C	YJL164C	NONE	NONE	0	0	0	0	0	0	0	0	0	0	0	0	0	0	0	0	0	0	0	0	0	0	0	0	0	0	0	0	0	0	0	0	0	0	0	0	0	0	0	0
chrX	109903	A	T	0.9881	1	YJL165C	YJL164C	NONE	NONE	0	0	0	0	0	0.9881	0	0	0	0	0	0	0	0	0	0	0	0	0	0	0	0	0	0	0	0	0	0	0	0	0	0	0	0	0	0	0	0	0	0
chrX	109905	A	T	10	1	YJL165C	YJL164C	NONE	NONE	0	0	0	0	0	10	0	0	0	0	0	0	0	0	0	0	0	0	0	0	0	0	0	0	0	0	0	0	0	0	0	0	0	0	0.0169	0	0	0	0	0
chrX	115137	C	T	0.9722	1	YJL163C	tE(UUC)J	YJL162C	SYNONYMOUS_CODING	0	0	0	0	0	0	0	0	0	0	0	0	0	0	0	0	0	0	0.9722	0	0	0	0	0	0	0	0	0	0	0	0	0	0	0	0	0	0	0	0	0
chrX	115984	G	A	10	1	YJL162C	YJL160C	tE(UUC)J	EXON	0	0	0	0	0	0	0	0	0	0	0	0	0	0	0	0	0	0	0	0	0	0	0	0	0.0068	0	0	0	0	0	0	0	0	0.0056	0	0	0	0	0	0
chrX	116005	G	T	10	1	YJL162C	YJL160C	tE(UUC)J	EXON	0	0	0	0	0	0	0	0	0	0	0	0	0	0	0	0.006	0	0	0	0	0	0	0.0083	0	0	0	0	0	0	0	0	0	0	0	0	0	0	0	0	0
chrX	116623	G	T	10	1	tE(UUC)J	YJL160C	NONE	NONE	0	0	0	0	0	0	0	0	0	0	0	0	0	0	0	0	0	0	0	0	0	0	0	0	0	0	0	0	0	0	0	0	0	0	0	0	0	0	0	0
chrX	118681	A	G	10	1	YJL159W	YJL161W	YJL160C	SYNONYMOUS_CODING	0	0	0	0.006	0	0	0	0	0	10	0	0	0	0	0	0	0	0	0	0	0	0	0	0	0	0	0	0	0	0	0	0	0	0	0	0	0	0	0	0
chrX	120382	C	A	10	1	YJL159W	YJL158C	NONE	NONE	0	0	0	0	0	0	0	0	0	0	0	0.0057	0	0	0	0	0	0	0	0	0	0	0	0	0	0.0056	0	0	0	0	0	0	0	0	0	0	0	0	0	0
chrX	120411	C	G	0.9934	1	YJL159W	YJL158C	NONE	NONE	0	0	0	0	0	0	0	0	0	0	0	0	0	0	0	0	0	0	0	0	0	0	0	0	0	0	0	0	0	0	0	0	0	0	0	0	0	0.9934	0	0
chrX	121629	C	T	10	1	YJL160C	YJL158C	YJL159W	SYNONYMOUS_CODING	0	10	0	0	0	0	0	0	0	0	0	0	0	0	0	0	0.0052	0	0	0	0	0	0	0	0	0	0	0	0	0	0.058	0	0	0	0	0	0	0	0	0
chrX	124524	A	G	10	1	YJL158C	YJL156C	YJL157C	NON_SYNONYMOUS_CODING	0	0	0	0	0	0	0	0	0	0	0	0	0	0	0	0	0	0	10	0	0	0	0	0	0	0	0	0	0	0	0	0	0	0	0	0	0	0	0	0
chrX	127658	G	C	10	1	YJL157C	YJL156W-A	YJL156C	SYNONYMOUS_CODING	0	0	0	0	0	0	0	0	0	0	0	0	0	0	0	0	10	0	0	0	0	0	0	0	0	0	0	0	0	0	0	0	0	0	0	0	0	0	0	0
chrX	131252	G	T	0.9925	1	YJL155C	YJL153C	YJL154C	NON_SYNONYMOUS_CODING	0	0	0	0	0	0	0	0	0	0	0	0	0	0	0	0	0	0.9925	0	0.01	0	0.0072	0	0	0	0	0	0	0	0	0	0	0	0	0	0	0	0	0	0
chrX	135274	A	G	10	1	YJL152W	YJL151C	YJL153C	NON_SYNONYMOUS_CODING	0	0	0	0	0	0	0	0	0	0	0	0	0	0	0	0	0	0	0	0	0	0	0	0	0	0	0	0	0	0	0	0	0	0	0	0	0	0	0	0
chrX	136021	C	T	10	1	YJL153C	YJL151C	NONE	NONE	0	0	0	0	0	0	0	0	0	0	0	0	0	0	0	0	0	0	0	0	0	0	0	0	0	0	0	0	0	0	0	0	0	0	0	10	0	0	0	0
chrX	136622	T	C	10	1	YJL150W	YJL152W	YJL151C	NON_SYNONYMOUS_CODING	0	0	0	0	0	0	0	0	0	0	0	0	0	0	0	0	0	0	0	0	0	0	0	0	0	0	0	0	0	0	0	0	0	0	0	0	0	0	0	0
chrX	138253	T	C	10	1	YJL151C	YJL150W	YJL149W	SYNONYMOUS_CODING	0	0	0	0	0	0	0	0	0.0068	0	0	0	0	0	10	0	0	0	0	0	0	0	0	0	0	0	0	0	0	0	0	0	0	0	0	0	0	0	0	0
chrX	139330	A	G	0.9928	1	YJL148W	snR128	YJL149W	NON_SYNONYMOUS_CODING	0	0	0	0	0	0	0	0	0	0	0	0	0	0	0	0	0	0	0	0	0	0	0	0	0	0	0	0	0	0	0	0	0	0	0	0.9928	0	0	0	0
chrX	139632	G	C	0.9915	1	YJL148W	snR190	snR128	EXON	0	0	0	0	0	0	0	0	0.012	0	0	0	0	0	0	0	0	0	0.0078	0	0	0	0	0	0	0	0	0	0	0	0	0	0.9915	0	0	0	0	0	0	0
chrX	144864	T	C	0.9873	1	YJL145W	YJL146W	NONE	NONE	0.0064	0	0	0	0	0	0	0	0	0	0	0	0	0	0	0	0	0	0	0	0	0	0	0	0.9873	0	0	0	0	0	0	0	0	0	0	0	0	0	0	0
chrX	146258	A	G	10	1	YJL144W	YJL145W	NONE	NONE	0	0	0	0	0	0	0	0	0	0	0	0	0	0	0	0	0	0	0	0	0	0	0	0	0	0	0	0	0	0	0	0	0	0	0.0066	0	0	0	0	0
chrX	156512	A	G	10	1	YJL137C	YJL136C	NONE	NONE	0	0	0	0	0	0	0	0	0	0	0	0	0	0	0	0	0	0	0	0	0	0	0	0	0	0	0	0	0	0	0	0	0	0	0	0	0	0	0	0
chrX	174172	G	C	10	1	YJL130C	YJL128C	YJL129C	NON_SYNONYMOUS_CODING	0	0	0	0	0	0	0	0	0	0	0	0	0	0	0	0	0	0	0	0	0	0	0	0	0	0	0	0	0	0	0	0	0	0	0	0	0	0	0	0
chrX	177107	G	A	10	1	YJL127W-A	YJL128C	YJL129C	SYNONYMOUS_CODING	0	0	0	0	0	0	0	0	0	0	0	0	0	0	0	0	0	0	0	0	0	0	0	0	0	0	0	0	10	0	0	0	0	0	0	0	0	0	0	0
chrX	177855	T	A	0.9883	1	YJL129C	YJL128C	NONE	NONE	0	0	0	0	0	0	0	0	0	0	0	0	0	0	0	0	0	0	0	0	0	0	0	0	0	0	0	0	0	0	0	0	0	0	0	0	0	0	0	0
chrX	180729	C	A	10	1	YJL128C	YJL127W-A	NONE	NONE	0	0	0	0	0	0	0	0	0	0	0	0.0116	0	0	0	0.0055	0	0	0	0	0	0	0	0	0	0	0	0.0067	0	0	0	0	0	0	0	0	0	0	0	0
chrX	183709	T	A	10	1	YJL126W	YJL125C	YJL127C	SYNONYMOUS_CODING	0	0	0	0	0	0	0	0	0	0	0	0	0	0	0	0	0	0	0	0	0	0	0	0	0	10	0	0	0	0	0	0	0	0	0	0	0	0	0	0
chrX	185357	C	T	0.9922	1	YJL127C	YJL125C	YJL126W	SYNONYMOUS_CODING	0	0	0	0	0	0	0	0	0	0	0	0	0	0	0	0	0	0	0	0	0	0	0	0	0	0	0	0	0	0	0	0	0	0	0	0	0	0	0	0
chrX	189434	A	G	0.9892	1	YJL122W	YJL121C	YJL123C	SYNONYMOUS_CODING	0	0	0	0	0	0	0	0	0	0	0	0	0	0	0	0	0	0	0	0	0	0	0	0	0	0	0	0	0	0	0	0	0	0	0.007	0	0	0	0	0
chrX	194946	C	T	0.9783	1	YJL116C	YJL117W	NONE	NONE	0	0	0	0	0	0	0	0	0	0	0	0	0	0	0	0	0	0	0	0	0	0	0	0	0	0	0	0	0	0	0	0	0	0	0.9783	0	0	0	0	0
chrX	198562	G	C	10	1	tA(AGC)J	YJL115W	YJL113W	NON_SYNONYMOUS_CODING	0	0	0	0	0	0	0	0	0	0	0	0	0	0	0	0	0	0	0	0	0	0	0	0	0	0	0	0	0	0	0	0	0	0	0	0	0	0	0	0
chrX	199242	T	A	0.9921	1	tA(AGC)J	YJL114W	YJL113W	SYNONYMOUS_CODING	0	0	0	0	0	0	0	0	0	0	0	0	0	0	0	0	0	0	0	0	0	0	0	0	0	0	0	0	0	0	0	0	0	0	0	0	0	0	0	0
chrX	200629	G	C	10	9	tA(AGC)J	YJL114W	YJL113W	NON_SYNONYMOUS_CODING	0	0	0	0	0	0	0	10	10	10	0	0	0	0	10	10	10	10	10	10	0	0	0	0	0	0	0	0	0	0	0	0	0.0068	0	0	0	0	0	0	0
chrX	201826	G	A	10	1	tD(GUC)J1	YJL114W	YJL113W	NON_SYNONYMOUS_CODING	0	0	0	0	0	0	0	0	0	0	0	0	0	0	0	0	0	0	0	0	0	0	0	0	0	0	0	0	0	0	0	0	0	0	0	0	0	0	0	0
chrX	204769	G	C	10	1	YJL112W	YJL113W	tD(GUC)J1	EXON	0	0	0	0	0	0	0	0	0	0	0	0	0	0	0	0	0	0	0	0	0	0	0	0	0	0	0	0	0	0	0	0	0	0	0	0	0	0	0	0
chrX	213662	G	C	10	1	YJL110C	YJL108C	YJL109C	NON_SYNONYMOUS_CODING	0	0	0	0	0	0	0	0	0	0	0	0	0	0	0	0	0	0	0	0	0	0	0	0	0	0	0	0	0	0	0	0	0	0	0	0.005	0	0	0	0
chrX	216268	T	A	10	1	YJL110C	YJL108C	YJL109C	NON_SYNONYMOUS_CODING	0	0	0	0	0	0	0	0	0	0	0	0	0	0	0	0	0	0	0	0	0	0	0	0	0	0	0	0	0	0	0	0	0	0	0	0	0	0	10	0
chrX	225970	C	G	10	1	YJL104W	snR37	YJL105W	SYNONYMOUS_CODING	0	0	0	0	0	0	0	0	0	0	0	0	0	0	0	0.0044	0	0	0	0	0	0	0	0	0	0	0	0	0	0	0	0	0	0	0	0	0	0	0	0
chrX	227406	G	A	10	1	YJL102W	YJL105W	YJL104W	NON_SYNONYMOUS_CODING	0	0	0	0	0	0	0	0	0	0	0	0	0	0	0	0	0	0	0	0	0	0	10	0	0	0	0	0	0	0	0	0	0	0	0	0	0	0	0	0
chrX	233358	A	C	10	1	tR(ACG)J	YJL101C	YJL102W	NON_SYNONYMOUS_CODING	0	0	0	0	0	0	0	0	0	0	0.005	10	0	0.0052	0	0	0	0	0	0	0	0	0	0	0	0.0057	0	0	0	0	0	0	0	0	0	0	0	0	0	0
chrX	233957	G	A	10	1	YJL103C	YJL102W	tR(ACG)J	EXON	0	0	0	10	0	0	0	0	0	0	0	0	0	0	0	0.0059	0	0	0	0	0	0	0	0	0	0	0	0	0	0	0	0	0	0	0	0	0	0	0	0
chrX	238310	C	T	10	1	YJL099W	tR(ACG)J	YJL100W	SYNONYMOUS_CODING	0	0	0	0	0	0	0	0	0	0	0	0	0	0	0	0	0	0	0	0	0	0	0	0	0	0	0	0	0	0	0	0	0	0	0	0	0	0	0	0
chrX	240979	T	C	10	1	YJL098W	YJL100W	YJL099W	NON_SYNONYMOUS_CODING	0	0	0	0	0	0	0	0	0	0	0	0	0	0	0	0	0	0	0	0	0	0	0	0	0	0	0	0	0	0	0	0	0	0	0	0	0	0	0	0
chrX	244929	C	T	10	1	YJL097W	YJL099W	YJL098W	SYNONYMOUS_CODING	0	0	0	0	0	0	0	0	0	0	0	0	0	0	0	0	0	0	0	0	0	0	0	0	0	0	0	0	0	0	0	0	0	0	0	0	0	0	0	0
chrX	245850	C	A	10	1	YJL096W	YJL098W	YJL097W	NON_SYNONYMOUS_CODING	0	0	0	0	0	0	0	0.0047	0	0	10	0	0	0	0	0	0	0	0	0	0	0	0	0	0	0	0	0	0	0	0	0	0	0	0	0	0	0	0	0
chrX	255932	G	C	10	1	YJL092W	YJL095W	YJL093C	NON_SYNONYMOUS_CODING	0	0	0	0	0	0	0	0	0	0	0	0	0	0	0	0	0	0	0	0	0	0	0	0	0	0	0	0	0	0	0	0	0.0141	0	0	0	0	0	0	10
chrX	257194	G	T	10	1	YJL092W	YJL091C	NONE	NONE	0	0	0	0	0	0	0	0	0	0	0	0	0	0	0	0.0129	0	0	0	0.0078	0	0	0	0	0	0	0	0	0	0	0	0	0.0208	0	0	0	0	0	0	10
chrX	257737	T	A	10	1	YJL093C	YJL091C	YJL092W	SYNONYMOUS_CODING	0	0	0	0	0	0	0	0	0	0	0	0	0	0	0	0	0	0	0	0	0	0	0	0	0	0	0	0	0	0	0	0	0	0	0	0	0	0	0	0
chrX	258308	C	G	0.9814	1	YJL093C	YJL091C	YJL092W	NON_SYNONYMOUS_CODING	0	0	0	0	0	0	0.0073	0	0	0	0	0	0	0	0	0	0	0	0	0	0	0	0	0	0	0	0	0	0	0	0	0	0	0	0	0	0	0	0	0
chrX	259584	A	G	10	1	YJL093C	YJL091C	YJL092W	NON_SYNONYMOUS_CODING	0	0	0	0	0	0	0	0	0	0	0	0	0	0	0	0	0	0	0	0	0	0	0	0	0	0	0	0	0	0	0	0	0	0	0	0	0	0	0	0
chrX	260069	C	A	10	1	YJL093C	YJL091C	YJL092W	NON_SYNONYMOUS_CODING	0	0	0.0053	0	0	0	0	0	0	0	0	0	0	0	0	0	0	0	0	0	0	10	0	0	0	0	0	0	0	0	0	0	0	0	0	0	0	0	0	0
chrX	265920	G	A	10	1	YJL090C	YJL087C	YJL089W	SYNONYMOUS_START	0	0	0	0	0	0	0	0	0	0	0	0	0	0	0	0	0	0	0	0	0	0	0	0	0	0	0	0	0	0	0	0	0	0	0	0	0	0	0	0
chrX	270196	T	C	10	1	YJL085W	YJL088W	YJL087C	NON_SYNONYMOUS_CODING	0	0	0	0	0	0	0	0	0	0	0	0	0	0	0	0	0	0	0	0	0	0	0	0	0	0	0	0	0	0	0	0	0	0	0.012	0	0	0	0.0068	10
chrX	274462	G	C	10	1	YJL086C	YJL084C	YJL085W	NON_SYNONYMOUS_CODING	0	0	0	0	0	0	0	0	0	0	0	0	0	0	0	0	0	0	0	0	0	0	0	0	0	0	0	0	0	0	0	0	0	0.0042	0	0	0	0	0	0
chrX	276401	T	C	10	1	YJL083W	YJL085W	YJL084C	SYNONYMOUS_CODING	0	0	0	0	0	0	0	0	0	0	0	0	0	0	0	0	0	0	0	0	0	0	0	0	0	0	0	0	0	0	0	0	0	0	0	0	0	0	0	0
chrX	277244	C	A	0.9922	1	YJL083W	YJL085W	YJL084C	SYNONYMOUS_CODING	0	0	0	0	0	0	0	0.0053	0	0	0	0	0	0	0	0	0	0	0	0	0	0	0	0	0	0.0064	0	0	0	0	0	0	0	0	0	0	0	0	0.007	0
chrX	283486	T	G	0.7153	1	NONE	YJL082W	NONE	NONE	0	0	0	0	0	0	0	0	0	0	0	0	0	0	0	0	0	0	0	0	0	0	0	0	0	0	0	0	0	0	0	0	0	0	0	0	0	0	0	0
chrX	284808	G	A	10	1	NONE	YJL080C	YJL081C	NON_SYNONYMOUS_CODING	0	0	0	0	0	0	0	0	0	0	0	0.0053	0	0	0	0	0	0	0	0	0	0	0	0	0	0	0	0	0	0	0	0	0	0	0	0	0	0	0	0
chrX	288797	G	C	10	1	YJL081C	YJL079C	YJL080C	NON_SYNONYMOUS_CODING	0	0	0	0	0	0	0	0	0	0	0	0	0	0	0	0	0	0	0	0	0	0	0	0	0	0	0	0	0	0	0	0	0	0	0	0	0	0	0	0
chrX	292225	G	T	0.8824	1	YJL079C	YJL077C	YJL078C	SYNONYMOUS_CODING	0	0	0	0	0	0	0	0	0	0	0	0	0	0	0	0	0	0	0	0	0	0	0	0	0	0	0	0.0063	0	0	0	0	0	0	0	0	0	0	0	0
chrX	292249	T	A	0.9565	1	YJL079C	YJL077C	YJL078C	NON_SYNONYMOUS_CODING	0	0	0	0	0	0	0	0	0	0	0	0	0	0	0	0	0	0	0	0	0	0	0	0	0	0	0	0	0	0	0.9565	0	0	0	0	0	0	0	0	0
chrX	292985	G	T	10	1	YJL077W-B	YJL077C	YJL078C	NON_SYNONYMOUS_CODING	0	0	0	0	0	0	0	0	0	0	0	0	0	0	0	0	0	0	0	0	0	0	0	0	0	0	0	0	0	0	0	0	0	0	0	0	0	0	0	0
chrX	296943	A	T	10	1	YJL077C	YJL075C	YJL076W	NON_SYNONYMOUS_CODING	0	0	0	0	0	0	0	0	0	0	0	0	0	0	0	0	0	0.0055	0	0	0	0	0	0	0	0	0	0	0	0	0	0	0	0	0	0	0	0	0	0
chrX	307184	A	G	0.9891	1	YJL072C	YJL070C	YJL071W	NON_SYNONYMOUS_CODING	0	0	0	0	0	0	0	0	0	0	0	0	0	0	0	0	0	0	0	0	0	0	0	0	0	0	0	0	0	0	0	0	0	0	0	0	0	0	0	0
chrX	310341	C	G	0.995	1	YJL067W	YJL069C	YJL070C	SYNONYMOUS_CODING	0	0	0	0	0	0	0	0	0	0	0	0	0	0	0	0	0	0	0	0	0	0	0	0	0	0	0	0	0	0	0	0	0	0	0	0	0	0	0	0
chrX	312682	G	T	10	1	YJL067W	YJL068C	YJL069C	NON_SYNONYMOUS_CODING	0	0	0	0	0	0.0041	0	0	0	0	0	0	0	0	0	0	0	0	0	0	0	0	0	0	0	0	0	0	0	0	0	0	0.0059	0	0	0	0	0	0	0
chrX	315802	T	G	0.9948	1	YJL065C	YJL064W	YJL063C	SYNONYMOUS_CODING	0	0	0.9948	0	0	0	0	0	0	0	0	0	0	0	0.0046	0	0	0	0	0	0	0	0	0	0	0	0	0	0	0	0	0	0	0	0	0	0	0	0	0
chrX	322936	T	C	0.6927	0	YJL060W	YJL061W	NONE	NONE	0	0	0	0	0	0	0	0	0	0	0	0	0	0	0	0	0	0	0	0	0	0	0	0	0	0	0	0	0	0	0	0	0	0	0	0	0	0	0	0
chrX	323426	T	C	0.9448	1	YJL059W	YJL061W	YJL060W	SYNONYMOUS_CODING	0	0	0	0	0	0	0	0	0	0	0	0	0	0.9448	0	0	0	0	0	0	0	0	0	0	0	0	0	0	0	0	0	0	0	0	0	0	0	0	0	0
chrX	339460	G	T	0.9944	1	YJL051W	YJL052W	NONE	NONE	0	0	0	0	0	0	0	0	0	0	0	0	0	0	0	0	0	0	0	0	0	0	0	0	0	0	0	0	0	0	0	0	0	0	0	0.9944	0	0	0	0
chrX	340169	C	G	10	1	YJL052C-A	YJL052W	YJL051W	NON_SYNONYMOUS_CODING	0	0	0	0	0	0	0	0	0	0	0	0	0	0	0	0	0	0	0	0	0	0	0	0	0	0	0	0	0	0	0	0.0066	0	0	0	0	0	0	0	0
chrX	352218	C	T	10	1	YJL047C	YJL049W	NONE	NONE	0	0	0	0	0	0	0	0	0	0	0	0	0	0	0	0	0	0	0	0	0	0	0	0	0	0	0	0	0	0	0	0	0	0	0.0063	0	0	0	0	0
chrX	362283	C	G	10	1	YJL044C	YJL043W	YJL042W	SYNONYMOUS_CODING	0	0	0	0	0	0	0	0	0	0	0	0	0	0	0	0	0	0	0	0	0	0	0	0	0	0	0	0	0	0	0	0	0	0	0	0	0	0	0	0
chrX	362332	T	C	0.8271	1	YJL044C	YJL043W	YJL042W	NON_SYNONYMOUS_CODING	0	0	0	0	0	0	0	0	0	0	0	0	0	0	0	0	0	0	0	0	0	0	0	0	0	0	0	0	0	0	0	0	0	0	0	0	0	0	0	0
chrX	378224	A	T	10	1	tV(AAC)J	YJL037W	NONE	NONE	0	0	0	0	0	0	0	0	0	0	0	0	0	0	0	0	0	0	0	0	0	0	0	0	0	0	0	0	0	0	0	0	0	0	0	0	0	0	0	0
chrX	379517	T	C	0.6131	0	YJL034W	YJL035C	YJL036W	NON_SYNONYMOUS_CODING	0	0	0	0	0	0	0	0	0	0	0	0	0	0	0	0	0	0	0	0	0	0	0	0	0	0	0	0	0	0	0	0.6131	0	0	0	0	0.0043	0	0	0
chrX	383386	A	T	0.935	1	YJL033W	YJL034W	NONE	NONE	0	0	0	0	0	0	0	0	0	0	0	0	0	0	0	0	0	0	0.935	0.0087	0	0	0	0	0	0.0148	0	0	0	0	0	0	0	0	0	0	0	0	0	0
chrX	391219	A	T	0.9882	1	YJL028W	YJL027C	NONE	NONE	0	0	0	0	0	0	0	0	0	0	0	0	0	0	0	0	0	0	0	0	0	0	0	0	0	0	0	0	0	0	0	0	0	0	0	0	0	0	0	0
chrX	391705	A	C	10	1	tM(CAU)J1	YJL028W	NONE	NONE	0	0	0	0	0	0	0	0	0	0	0	0	0	0	0	0	0	0	0	0	0	0	0	0	0	0	0	0	0	0	0	0	0	0	0	0	0	0	0	0
chrX	392988	G	T	10	1	YJL027C	YJL026C-A	YJL026W	SYNONYMOUS_CODING	0	0	0	0	0	0	0	0	0	0	0	0	0	0	0	0	0	0	0	0	0	0	0	0	0	0	0	0	0	0	0	0	0	0	10	0	0	0	0	0
chrX	395034	C	G	10	1	YJL026C-A	YJL024C	YJL025W	SYNONYMOUS_CODING	0	0	0	0	0	0	0	0	0	0	0	0	0	0	10	0	0	0	0	0	0	0	0	0	0	0	0	0	0	0	0	0	0	0	0	0	0	0	0	0
chrX	395456	A	G	10	1	YJL026C-A	YJL024C	YJL025W	NON_SYNONYMOUS_CODING	0	0	0	0	0	0	0	0	0	0	0.0048	0.0101	0	0	0	0	0	0	0	0	0	0	0	0	0	0	0	0	0	0	0	0	0	0	0	0	0	0	0	0
chrX	396898	G	A	10	1	tG(GCC)J1	YJL023C	NONE	NONE	0	0	0	0	0	10	0	0	0	0	0	0	0	0	0	0	0	0	0	0	0	0	0	0	0	0	0	0	0	0	0	0	0	0	0	0	0	0	0	0
chrX	410192	A	T	10	1	YJL015C	YJL012C	YJL013C	SYNONYMOUS_CODING	0	0	0	0	0	0	0	0	0	0	0	0	0	0	0	0	0	0	0	0	0	0	0	0	0	0	0	0	0	0	0	0	0	0	0	0	0	0	0	0
chrX	415005	G	A	0.9808	1	YJL011C	tW(CCA)J	tK(CUU)J	EXON	0	0	0	0	0	0	0	0	0	0	0	0	0	0	0	0	0	0	0	0	0	0	0	0	0	0	0	0	0	0	0	0	0	0	0	0	0	0	0	0
chrX	436650	G	A	10	1	YJR001W	YJL001W	NONE	NONE	0	10	0	0	0	0	0	0	0	0	0	0	0	0	0	0	0.0114	0	0	0	0	0	0	0	0	0	0	0	0	0	0.0317	0	0	0	0	0	0	0	0	0
chrX	454710	A	T	10	1	YJR009C	YJR008W	NONE	NONE	0	0	0	0	0	0	0	0	0	0	0	0	0	0	0	0	0	0	0	0	0	0	0	0	0	0	0	0	0	0	0	0	0	0	0	0	0	0	0	0
chrX	456522	A	G	10	1	YJR009C	YJR010C-A	YJR010W	NON_SYNONYMOUS_CODING	0	0	0	0	0	0	0	0	0	0	0	0	0	0	0	0	0	0	0	0	0	0	0	0	0	0	0	0	0	0	0	0	0	0	0	0	0	0	0	0
chrX	461012	G	T	10	1	YJR012C	YJR010W	YJR013W	NON_SYNONYMOUS_CODING	0	0	0	0	0	0	0	0	0	0	0	0	0	0	0	0	0	0	0	0	0	0	0	0	0	0	0	0	0	0	0	0	0	0	0	0	0	0	0	0
chrX	462350	G	A	0.959	1	YJR015W	YJR013W	YJR014W	SYNONYMOUS_CODING	0	0	0	0	0	0	0.0048	0	0	0	0	0	0	0.959	0	0	0	0	0	0	0	0	0	0	0	0	0	0	0	0	0	0	0	0	0	0	0	0	0	0
chrX	470915	G	A	0.964	1	YJR023C	YJR025C	YJR024C	SYNONYMOUS_CODING	0	0	0	0	0	0	0	0	0	0	0	0	0	0	0	0	0	0	0.964	0	0	0	0	0	0	0	0	0	0	0	0.0062	0	0	0	0	0	0	0	0	0
chrX	471658	T	C	0.9918	1	YJR024C	YJR022W	YJR025C	NON_SYNONYMOUS_CODING	0	0	0	0	0	0	0	0	0	0	0	0	0	0	0	0	0	0	0	0	0	0	0	0	0	0	0	0	0	0	0	0	0	0	0	0	0	0	0	0
chrX	484746	C	G	10	1	NONE	YJR029W	YJR030C	SYNONYMOUS_CODING	0	0	0	0	0	0	0	0	0	0	0	0	0	0	0	0	0	0	0	0	0	0	0	0	0	0	0	0	0	0	0	0	0	0	0	0	0	0	0	0
chrX	489810	A	T	0.9789	1	YJR032W	YJR033C	YJR031C	SYNONYMOUS_CODING	0	0	0	0.0064	0	0	0.9789	0	0	0	0	0	0.007	0	0	0	0	0	0	0	0	0	0	0	0	0	0	0	0	0	0	0	0	0	0	0	0	0	0	0
chrX	492480	T	C	10	1	YJR031C	YJR032W	YJR033C	NON_SYNONYMOUS_CODING	0	0	0	0	0	0	0	0	0	0	0	0	0	0	0	0	0	0	0	0	0	0	0	0	0	0	0	0	10	0	0	0	0	0	0	0	0	0	0	0
chrX	492970	C	G	0.9944	1	YJR031C	YJR032W	YJR033C	SYNONYMOUS_CODING	0	0	0	0	0	0	0	0	0	0	0	0	0	0	0	0	0	0	0	0	0	0	0	0	0	0	0	0	0	0	0	0	0	0	0	0	0	0	0	0
chrX	502397	A	T	10	1	YJR037W	YJR038C	YJR036C	SYNONYMOUS_CODING	0	0	0	0	0	0	0	0	0	0	0	0	0	0	0	0	0	0	0	0	0	0	0	0	0	0	0	0	0	0	0	0	0	0	0	0	0	0	10	0
chrX	502673	A	G	10	1	YJR037W	YJR038C	YJR036C	SYNONYMOUS_CODING	0	0	0	0	0	0	0	0	0	0	0	0	0	0	0	0	0	0	0	0	0	0	0	0	10	0	0	0.0047	0	0	0	0	0	0	0	0	0	0	0	0
chrX	503250	C	G	10	1	YJR039W	YJR038C	YJR036C	NON_SYNONYMOUS_CODING	0	0	10	0	0	0	0	0	0	0	0	0	0	0	0	0	0	0	0	0	0	0	0	0	0	0	0	0	0	0	0	0	0.0078	0	0	0	0	0	0	0
chrX	503435	T	C	10	1	YJR036C	YJR038C	YJR037W	SYNONYMOUS_CODING	0	0	0	0	0	0	0	0	10	0	0	0	0	0	0	0	0	0	0	0	0	0	0	0	0	0	0	0	0	0	0	0	0	0	0	0	0	0	0	0
chrX	504282	T	C	10	1	YJR038C	YJR037W	YJR039W	SYNONYMOUS_CODING	0	0	0	10	0	0	0	0	0	0	0	0	0	0	0	0	0	0	0	0	0	0	0	0	0	0	0	0	0	0	0	0	0	0	0	0	0	0	0	0
chrX	513823	C	G	10	1	YJR041C	YJR043C	NONE	NONE	0	0	0	0	0	0	0	0	0.006	0	0	0	0	0	0	0	0	0	0	0	0	0	0.0058	0	0	0	0	0	0	0	0.0059	0	0	0	0	0	0	0	0	0
chrX	524130	C	A	0.9952	1	tS(AGA)J	YJR046W	NONE	NONE	0	0	0	0	0	0	0.0056	0	0	0	0	0	0	0	0	0	0	0	0	0	0	0	0	0	0	0	0	0	0	0	0	0	0	0	0	0	0	0	0	0
chrX	529571	C	G	10	2	YJR051W	YJR050W	NONE	NONE	0	0	0	0	0	0	0	0	0	0	0	0	0	0	0	0	0	0	0	0	0	0	0	0	0	0	0	0	0	0	0	0	0	0	0	0	0	0	0	0
chrX	531635	T	A	0.995	1	tG(GCC)J2	YJR051W	NONE	NONE	0	0	0	0	0	0	0	0	0	0	0	0	0	0	0	0	0	0	0	0	0	0	0	0	0	0	0	0	0	0	0	0	0	0	0	0	0	0	0	0
chrX	531837	G	C	10	1	YJR052W	YJR051W	tG(GCC)J2	EXON	0	0	0	0	0	0	0	10	0	0	0	0	0	0	0	0	0	0	0	0	0	0	0	0	0	0	0	0	0	0	0	0	0	0	0	0	0	0	0	0
chrX	535639	C	G	10	2	YJR054W	YJR052W	YJR053W	NON_SYNONYMOUS_CODING	0	0	0	0	0	0	0	0	0	0	0	0	0	0	0	0	0.0054	0	0	0	0	0	0	0	0	0	0.0033	0	0	0	0	0	0	0	0	0	0	0	0	0
chrX	541567	G	A	10	1	YJR057W	YJR056C	tD(GUC)J4	EXON	0	0	0	0	0	0	0	0	0	0	0	0	0	0	0	0	0	0	0	0	0	0	0	10	0	0	0	0	0	0	0	0	0	0	0	0	0	0	0	0
chrX	542946	A	G	10	1	YJR056C	tY(GUA)J2	NONE	NONE	0	0	0	0	0	0	0	0	0	0	0	0	0	0	0	0	0	0	0	0	0	0	0	10	0	0	0	0	0	0	0	0	0	0	0	0	0	0	0	0
chrX	543892	A	G	10	1	YJR057W	YJR058C	NONE	NONE	0	0	0	0	0	0	0	0	0	0	0	0	0	0	0	0	0	0	0	0	0	0	0	0	0	0	0	0	0	0	0	0	0	0	0	0	10	0	0	0
chrX	559767	A	T	0.9941	1	YJR065C	YJR064W	YJR066W	SYNONYMOUS_CODING	0	0	0	0	0.0058	0	0.9941	0	0	0	0	0	0	0	0	0	0	0	0	0	0	0	0	0	0	0	0	0	0	0	0	0	0	0	0	0	0	0	0	0
chrX	567519	C	G	0.9895	1	YJR067C	YJR066W	NONE	NONE	0	0	0	0	0	0	0	0	0	0	0	0	0	0	0	0	0	0	0	0	0	0	0	0	0	0	0	0	0	0	0	0	0	0	0	0	0	0	0	0
chrX	574481	G	A	10	1	YJR073C	YJR074W	YJR075W	NON_SYNONYMOUS_CODING	0	0	0	0	0	0.005	0	10	0	0	0	0	0	0	0	0	0	0	0	0	0	0	0	0	0	0	0	0	0	0	0	0	0	0	0	0	0	0	0	0
chrX	577424	C	T	10	1	YJR076C	YJR075W	YJR077C	SYNONYMOUS_CODING	0	0	0	0	0	0	0	0	0	0	0	0	0	0	0	0	0	0	0	0	0	0	0	0	0	0	0	0	0	0	0	0	0	0	0	0	0	0	0	0
chrX	577477	T	C	10	1	YJR076C	YJR075W	YJR077C	SYNONYMOUS_CODING	0	0	0	0	0	0	0	0	0	0	0	0	0	0	0	0	0	0	0	0	0	0	0	0	0	0	0	0	0	0	0	0	0	0	0	0	0	0	0	0
chrX	578561	G	C	10	1	YJR078W	YJR080C	NONE	NONE	0	0	0	0	0	0	0	0	0	0	0	0	0	0	0	0	0	0	0	0	0	0	0	0	0	0	0	0	0	0	0	0	0	0	10	0	0	0	0	0
chrX	579453	T	C	10	1	YJR079W	YJR080C	YJR078W	NON_SYNONYMOUS_CODING	0	0	0	0	0	0	0	0	0	0	0	0	0	0	10	0	0	0	0	0	0	0	0	0	0	0	0	0	0	0	0	0	0	0	0	0	0	0	0	0
chrX	583096	T	C	10	1	YJR084W	YJR079W	YJR083C	SYNONYMOUS_CODING	0	0	0	0	0	0	0	0	0	0	0	0	0	0	0	0	0	0	0	0	0	0	0	0	0	0	0	0	0	0	0	0	0	0	0	0	0	0	0	0
chrX	583481	A	G	10	1	YJR084W	YJR085C	YJR083C	SYNONYMOUS_CODING	0	0	0	0	0	0	0	0	0	0	0	0	0	0	0	0	0	0	0	0	0	0	0	0	0	0	0	0	0	0	0	0	0	0	0	0	0	0	0	0
chrX	583520	T	C	0.9933	1	YJR084W	YJR085C	YJR083C	SYNONYMOUS_CODING	0	0	0	0	0	0	0	0	0	0	0	0	0	0	0	0	0	0	0	0	0	0	0	0.9933	0	0	0	0	0	0	0	0	0	0	0	0	0	0	0	0
chrX	588273	G	T	10	1	YJR088C	YJR087W	YJR089W	SYNONYMOUS_CODING	0	0	0	0	0	0	0	0	0	0	0	0	0	0	10	0	0	0	0	0	0	0	0	0	0	0	0	0	0	0	0	0	0	0	0	0	0	0	0	0
chrX	591366	G	A	0.9907	1	YJR088C	YJR089W	YJR090C	NON_SYNONYMOUS_CODING	0	0	0	0	0	0	0	0	0	0	0	0	0	0	0	0	0	0	0	0	0	0	0	0	0	0	0	0	0	0	0	0	0	0	0	0	0	0	0	0
chrX	591646	G	C	10	1	YJR088C	YJR089W	YJR090C	NON_SYNONYMOUS_CODING	0	0	0	0	0	0	0	0	0	0	0	10	0	0	0	0	0	0	0	0	0	0	0	0	0	0	0	0	0	0	0	0	0	0	0	0	0	0	0	0
chrX	594858	A	G	10	1	YJR090C	YJR091C	NONE	NONE	0	0	0	0	0	0	0	0	0	0	0	0	0	0	0	0	0	0	0	0	0	0	0	0	0	0	0	0	0	0	0	0	0	0	0	10	0	0	0	0
chrX	594925	C	A	0.9928	1	YJR090C	YJR091C	NONE	NONE	0	0	0	0	0	0	0	0	0	0	0	0	0	0	0	0	0	0	0	0	0	0	0	0	0	0	0	0	0	0	0	0	0	0	0	0	0	0	0	0
chrX	604058	T	G	10	1	YJR094W-A	YJR094C	YJR093C	NON_SYNONYMOUS_CODING	0	0	0	0	0	0	0	0	0	0	0	0	0	0	0	0	0	0	0	0	0	0	0	0	0	0	10	0	0	0	0	0	0	0	0	0	0	0	0	0
chrX	607927	A	G	10	1	YJR094W-A	YJR092W	NONE	NONE	0	0	0	0	0	0	0	0	0	0	0	0	0	0	0	0	0	0	0	0	0	0	0	0	0	0	0	0	0	0	0	0	0	0	10	0	0	0	0	0
chrX	608623	T	C	0.987	1	YJR095W	YJR098C	YJR094W-A	NON_SYNONYMOUS_CODING	0	0	0	0	0	0	0	0.987	0	0	0	0	0	0	0	0	0	0.0067	0	0	0	0	0	0	0	0	0	0	0	0	0	0	0.0058	0	0	0	0	0	0	0
chrX	610089	G	C	0.6091	0	YJR096W	YJR094W-A	YJR095W	NON_SYNONYMOUS_CODING	0	0	0	0	0	0	0	0	0	0	0	0	0	0	0	0	0	0	0	0	0	0	0	0	0	0	0	0	0	0	0	0	0	0	0	0	0	0	0	0
chrX	611192	T	C	0.9906	1	YJR097W	YJR095W	YJR096W	SYNONYMOUS_CODING	0	0	0	0	0	0	0	0	0	0	0	0	0	0	0	0	0	0	0	0	0	0	0.0064	0	0	0	0	0	0	0	0	0	0	0	0	0	0	0	0	0
chrX	615750	A	G	10	1	YJR098C	YJR100C	YJR099W	NON_SYNONYMOUS_CODING	0	0.0074	0	10	0	0	0	0	0	0	0	0	0	0	0	0	0	0	0	0	0	0	0	0	0	0	0	0	0	0	0	0	0	0	0	0	0	0	0.0056	0
chrX	616293	G	C	10	1	YJR098C	YJR099W	NONE	NONE	0	0	0	0	0	0	0	0	0	0	0	0	0	0	0	0	0	0	0	0	0	0	0	0	0	0	0	0	0	0	0	0	0	0	0	0	0	0	0	0
chrX	625765	A	G	10	1	YJR107W	YJR105W	YJR106W	NON_SYNONYMOUS_CODING	0	0	0	0	0	0	0	0	0	0	0	0	0	0	0	0	0	0	0	10	0	0	0	0	0	0	0	0	0	0	0	0	0	0	0	0	0	0	0	0
chrX	640554	G	C	10	1	YJR116W	YJR115W	NONE	NONE	0	0	0	0	0	0	0	0	0.0062	0	0	0	0	0	0	0	0	0	0	0	0	0	0	0	0	0	0	0	0	0	0	0	0	0	0	0	0	0	0	0.0087
chrX	640677	G	T	10	1	YJR116W	YJR115W	NONE	NONE	0	0	0	0	0	0	0	0	0	0	0	0	0	0.0062	0	0	0	0	0	0	0	0	0	0	0	0	0	0	0	0	0	0	10	0	0	0	0.005	0	0	0.009
chrX	641051	C	T	0.773	1	YJR117W	YJR115W	YJR116W	SYNONYMOUS_CODING	0	0	0	0	0	0	0	0	0	0	0	0	0	0	0	0	0	0	0	0	0	0	0	0	0	0	0	0	0	0	0	0	0	0	0	0	0	0	0	0
chrX	644484	C	A	10	1	YJR118C	YJR117W	YJR119C	NON_SYNONYMOUS_CODING	0	10	0	0	0	0	0	0	0	0	0	0	0	0	0	0	0	0	0	0	0	0	0	0	0	0	0	0	0	0	0	0	0	0	0	0	0	0	0.0065	0
chrX	651707	G	T	10	1	YJR123W	YJR122W	NONE	NONE	0	0	0	0	0	0	0	0	0	0	0	0	0	0	0	0	0	0	0	10	0	0	0	0	0	0	0	0	0	0	0	0	0	0	0	0	0	0	0	0
chrX	658483	G	C	10	1	YJR125C	YJR127C	YJR126C	SYNONYMOUS_CODING	0	0	0	0	0	0	0	0	10	0	0	0	0	0	0	0	0	0	0	0	0	0	0	0	0	0	0	0	0	0	0	0	0	0	0	0	0	0	0	0
chrX	663684	C	T	10	1	snR3	YJR129C	NONE	NONE	0	0	0	0	0	0	0	0	10	0	0	0	0	0	0	0	0	0	0	0	0	0	0	0	0	0	0	0	0	0	0	0	0	0	0	0	0	0	0	0
chrX	667925	C	G	10	1	YJR130C	snR3	YJR131W	NON_SYNONYMOUS_CODING	0	0	0	0	0	0	0	0	0	0	0	0	0	0	0	0	0	0	0	0	0	0	0	0	0	0	0	0	0	0	0	0	0	0	0	0	0	0	0	0
chrX	668452	G	T	0.9877	1	YJR132W	snR3	YJR131W	NON_SYNONYMOUS_CODING	0	0	0	0	0	0	0	0	0	0	0	0	0	0	0.9877	0	0	0	0	0	0	0	0	0	0	0	0	0	0	0	0	0	0	0	0	0	0	0	0	0
chrX	675583	A	G	10	1	YJR135W-A	YJR135C	YJR134C	SYNONYMOUS_CODING	0	0	0	0	0	0.0044	0	0	0	0	0	0	0	0	10	0	0	0	0	0	0	0	0	0	0	0	0	0	0	0	0	0	0	0	0	0	0	0	0	0
chrX	683839	T	A	0.5793	0	YJR137C	NONE	NONE	NONE	0	0	0	0	0	0	0	0	0	0	0	0	0	0	0	0	0.5793	0	0	0	0	0	0	0	0	0	0	0	0	0	0	0	0	0	0	0	0	0	0	0
chrX	690297	C	A	0.9943	1	YJR140W-A	YJR140C	YJR139C	SYNONYMOUS_CODING	0	0	0	0	0.0044	0	0	0	0	0	0	0	0.005	0	0	0	0	0	0.0053	0	0	0	0	0	0	0	0	0	0	0	0	0	0	0	0	0	0	0	0	0
chrX	694461	A	G	0.5365	0	YJR141W	YJR140W-A	YJR140C	NON_SYNONYMOUS_CODING	0	0	0	0	0	0	0	0	0	0	0	0	0	0	0	0	0	0	0	0	0	0.0046	0	0	0	0	0	0	0	0	0	0	0	0	0	0	0	0	0.0047	0
chrX	695216	T	C	0.9932	1	YJR141W	YJR143C	YJR140C	NON_SYNONYMOUS_CODING	0	0	0	0	0.0055	0	0	0.9932	0.0048	0	0	0	0	0	0	0	0	0	0	0	0	0	0	0	0	0	0	0	0	0	0	0	0	0	0	0	0	0	0	0
chrX	700692	C	A	10	1	YJR143C	YJR145C	NONE	NONE	0.0097	0	0	0	0	0	0.0061	0	0	0	0	0	0	0	0	0	0	0	0	0	0	0	0	0	0	0	0	0	0	0	0	0	0	0	0	0	0	0	0	0
chrX	710050	C	T	10	1	YJR150C	YJR149W	NONE	NONE	0	0	0	0	0	0	0	0	0	0	0	0	0	0	0	0	0	0	0	0	0	0	0	10	0	0	0	0	0	0	0	0	0	0	0	0	0	0	0	0
chrX	710482	C	A	10	1	YJR150C	YJR151C	NONE	NONE	0	0	0	0	0	0	0	0	0	0	0	0	0	0	0	0	0	0	0	0	0	0	0	0	0	0	0	0	0	0	0	0	0	0	0	0	0	0	0	0
chrX	710682	A	G	10	1	YJR150C	YJR151C	NONE	NONE	0	0	0	0	0	0	0	0	0	0	0	0	0	0	0	0	0	0	0	0	0	0	0	0	0	0	0	0	0	0	0	0	0	0	0	0	0	0	0	0
chrX	713708	G	A	0.8816	1	YJR151W-A	NONE	YJR151C	NON_SYNONYMOUS_CODING	0	0	0	0	0	0	0	0	0	0	0	0	0	0	0	0	0	0	0.8816	0	0	0	0	0	0	0	0	0	0	0	0	0	0	0	0	0	0	0	0	0
chrX	715556	T	C	10	1	YJR151W-A	NONE	YJR151C	NON_SYNONYMOUS_CODING	0	0	0	0	0	0	0	0	0	0	0	0	0	0	0	0	0	0	0	0	0	0	0	0	0	0	0	0	0	0	0	0	0	0	0	0	0	0	0	0
chrX	720892	C	G	10	1	YJR153W	YJR151W-A	YJR152W	NON_SYNONYMOUS_CODING	0	0	0	0	0	0	0	0	0	0	0	0	0	0	0	0	0	0	0	0	0	0	0	0	0	0	0	0	0	0	0	0	0	0	0	0	0	0	0	0
chrX	722674	A	T	10	1	YJR153W	YJR152W	NONE	NONE	0	0	0	0	0	0	0	0	0	0	0	0	0	0	0	0	0	0	0	0	0	0	0	0	0	0	0	0	0	0	0	0	0	0	0	0	0	0	0	0
chrX	723857	C	G	10	1	YJR154W	YJR152W	YJR153W	SYNONYMOUS_CODING	0	0	0	0	0	0.005	0	0	0	0	10	0	0	0	0	0	0	0	0	0	0	0	0	0	0	0	0	0	0	0	0	0	0	0	0	0.0056	0	0	0	0
chrX	727282	G	T	10	1	YJR155W	YJR154W	NONE	NONE	0	0	0	0	0	0	0	0	0	0	10	0	0	0	0	0	0	0	0	0	0	0	0	0	0	0	0.005	0	0	0	0	0	0	0	0	0	0	0	0	0
chrX	730709	T	A	0.9464	1	YJR156C	YJR155W	YJR157W	NON_SYNONYMOUS_CODING	0	0	0	0	0	0	0	0	0	0	0	0	0	0	0	0	0	0	0	0	0	0	0	0	0	0	0	0	0	0	0	0	0	0	0	0	0	0	0	0
chrX	744449	T	C	0.4	0	YJR161C	YJR162C	NONE	NONE	0	0	0	0	0	0	0	0	0	0	0	0	0	0	0	0	0	0	0	0	0	0	0	0	0	0	0	0	0	0	0	0	0	0	0	0	0	0	0	0
chrXI	6039	T	A	10	1	YKL221W	YKL220C	NONE	NONE	0	0	0	0	0	0	0	0	0	0	0	0	0	0	0	0	0	0	0	0	0	0	10	0	0	0	0	0	0	0	0	0	0	0	0	0	0	0	0	0
chrXI	9344	T	C	10	1	YKL222C	YKL221W	YKL220C	SYNONYMOUS_CODING	0	0	0	0	0	0	0	0	0	0	0	0	0	0	0	0	0	0	0	0	0	0	0	0	0	0	0	0	0	0	0	0	0	0	0	0	0	0	0	0
chrXI	9713	T	C	0.9907	1	YKL222C	YKL221W	YKL220C	SYNONYMOUS_CODING	0	0	0	0	0	0	0	0	0	0	0	0	0	0	0	0	0	0	0	0	0	0	0	0	0	0	0	0	0	0	0	0	0	0.0047	0	0	0	0	0	0
chrXI	12122	T	A	0.6028	0	YKL220C	YKL221W	NONE	NONE	0	0	0	0	0	0	0	0	0	0	0	0	0	0	0	0	0	0	0	0	0	0	0	0	0	0	0	0	0	0	0	0	0	0	0	0	0	0	0	0
chrXI	12974	A	G	10	1	YKL219W	YKL218C	NONE	NONE	0	0	0	0	0	0	0	0	0	0	0	0	0	0	0	0	0	0	0	0	0	0	0	0	0	0	0	0	0	0	0	0	0	0	0	0	0	0	0	0
chrXI	17163	G	T	10	1	NONE	YKL218C	NONE	NONE	0	0	0	0	0	0	0	0	0	0	0	0	0	0	0	0	0	0	0.0068	0	0	0	0	0	0	0	0	0	0.0064	0	0	0	0	0	0	0	0	0	0	0
chrXI	18750	C	G	0.9482	1	YKL218C	YKL219W	NONE	NONE	0	0	0	0	0	0	0	0	0	0	0	0	0	0.9482	0	0	0	0	0	0	0	0	0	0	0	0	0	0	0	0	0	0	0	0	0	0	0	0	0	0
chrXI	35672	A	G	0.9846	1	YKL213C	YKL211C	YKL212W	NON_SYNONYMOUS_CODING	0	0	0	0	0	0	0	0	0	0	0	0	0	0	0	0	0	0	0	0	0	0	0	0	0	0	0	0	0	0	0	0	0	0	0	0	0	0	0	0
chrXI	38663	T	C	10	1	snR64	YKL212W	NONE	NONE	0	0	0	0	0	0	0	0	0	0	0	0	0	0	0	0	0	0	0	0	0	0	0	0	0	0	0	0	0	0	0	0	0	0	0	0	0	0	0	0
chrXI	42722	C	G	10	1	YKL208W	YKL210W	YKL209C	NON_SYNONYMOUS_CODING	0	0	0	0	0.005	0	0	0	0	0	0	0	0	0	0	0	0	0	0	0	0	0	0	0	0	0	0	0	0	0	0	0	0	0	0	0	0	0	0	0
chrXI	47898	G	C	10	1	YKL207W	YKL206C	YKL208W	SYNONYMOUS_CODING	0	0	0	0	0	0	0	0	0	0	0	0	0	0	0	0	0	0	0	0	0.0106	0	0	0	0	0	0	0	0	0	0	0	0	0	0	0	0	0	0	0
chrXI	52079	T	G	10	1	YKL204W	YKL207W	YKL205W	NON_SYNONYMOUS_CODING	0	0	0	0	0	0	0	0	0	0	0	0	0	0	0	0	0	0	0	0	0	0	0	0	0	0	0	0	0	0	0	0	0	0	10	0	0	0	0	0
chrXI	53718	A	T	10	1	YKL206C	YKL205W	YKL204W	NON_SYNONYMOUS_CODING	0	0	0	0	0	0	0	0	0	0	0	0	0	0	0	0	0	0	0	0	0	0	0	0	0	0	0	0	0	0	0	0	0	0	0	0	0	0	0	0
chrXI	55157	C	G	10	1	NONE	YKL203C	YKL204W	NON_SYNONYMOUS_CODING	0	0	0.0112	0	0	0	0	0	0	0	10	0	0	0	0	0	0	0	0	0	0	0	0	0	0	0	0	0	0	0	0	0	0	0	0	0	0	0	0	0
chrXI	55182	A	T	10	1	NONE	YKL203C	YKL204W	NON_SYNONYMOUS_CODING	0	0	0	0	0	0	0	0	0	0	0	0	0	0	0	0	0	10	0	0	0	0	0	0	0	0	0	0	0	0	0	0	0	0	0	0	0	0	0	0
chrXI	73701	G	T	10	1	tN(GUU)K	YKL196C	YKL197C	NON_SYNONYMOUS_CODING	0	0	0	0.0049	0	0	0	0	0	0	0	0	0	0	0	0	0	0	0	0	0	0	0	0	0	0.0114	0	0	0	0	0	0	0	0	0	0	0	0	0	0
chrXI	74365	A	T	10	1	tN(GUU)K	YKL196C	NONE	NONE	0	10	0	0	0	0	0	0	0	0	0	0	0	0	0	0	0	0	0	0	0	0	0	0	0	0	0	0	0	0	0.0506	0	0	0	0	0	0	0	0	0
chrXI	74669	C	T	10	1	YKL197C	YKL196C	tN(GUU)K	EXON	0	0	0	0	10	0	0	0	0	0	0	0.0081	0	0	0	0	0	0	0	0	0	0	0	0	0	0	0	0	0	0	0	0	0	0	0	0	0	0	0	0
chrXI	77804	C	A	10	1	YKL196C	YKL195W	YKL194C	NON_SYNONYMOUS_CODING	0	0	0	0	0	0	0	0	0	0	0	0	0	0	0	0	0	0	0	0	0	0	0	0	0	0.0064	0	0	0	0	0	0	0	0	0	0	0	0	0	0
chrXI	80728	A	G	10	1	YKL192C	YKL195W	NONE	NONE	0	0	0	0	0	0	0	0	0	0	0	0	0	0	0	0	0	0	0	0	0	0	0	0	0	0	0	0	0	0	0	0	0	0	0	0	0	0	0	0
chrXI	81129	G	T	0.7762	1	YKL192C	YKL195W	YKL191W	NON_SYNONYMOUS_CODING	0	0	0	0	0	0.0056	0	0	0	0	0	0	0	0	0	0	0	0	0	0	0	0	0	0	0	0	0.0058	0	0	0	0	0	0	0	0	0	0.0049	0	0	0
chrXI	84180	A	T	0.9915	1	tL(UAA)K	YKL190W	NONE	NONE	0	0	0	0	0	0	0	0	0	0	0	0	0	0	0	0	0	0	0	0	0	0	0	0	0	0	0	0	0	0	0	0	0	0	0	0	0	0	0	0
chrXI	84291	C	T	0.6053	0	YKL189W	YKL190W	tL(UAA)K	EXON	0	0	0	0	0	0	0	0	0	0	0	0	0	0	0	0	0	0	0	0	0.6053	0	0	0	0	0	0	0	0	0	0	0	0	0	0	0	0	0	0	0
chrXI	84760	A	G	10	1	YKL192C	tL(UAA)K	YKL189W	NON_SYNONYMOUS_CODING	0	0	0	10	0	0	0	0	0	0	0	0	0	0	0	0	0	0	0	0	0	0	0	0	0	0	0	0	0	0	0	0	0	0	0	0	0	0	0	0
chrXI	93306	T	A	10	1	YKL186C	NONE	NONE	NONE	0	0	0	0	0	0	0	0	0	0	0	0	10	0.0496	0	0	0	0	0	0	0	0	0	0	0	0	0	0	0	0	0	0	0	0	0	0	0	0	0	0
chrXI	101150	A	T	0.7778	1	YKL183C-A	YKL183W	YKL182W	NON_SYNONYMOUS_CODING	0	0	0	0	0	0	0	0	0	0	0	0	0	0	0	0	0	0	0	0	0	0	0	0	0	0	0	0	0	0	0	0	0	0	0	0	0	0	0	0
chrXI	108799	A	T	10	1	YKL180W	YKL181W	NONE	NONE	0	0	0	0	0	0	0	0	0	0	0	0	0	0	0	0	0	0	0	0	0	0	0	0	0	0	0	0	0	0	0	0	0	0	0	0	0	0	0	0.0074
chrXI	123818	A	G	0.9609	1	YKL174C	YKL175W	YKL173W	NON_SYNONYMOUS_CODING	0	0	0	0	0	0	0	0	0	0.0067	0	0	0	0.9609	0	0	0	0	0	0	0	0	0	0	0	0	0	0	0	0	0	0	0	0	0	0	0	0	0	0
chrXI	131652	C	A	0.6429	0	YKL169C	YKL170W	YKL168C	STOP_GAINED	0	0	0	0	0	0	0	0	0	0	0	0	0	0	0	0	0	0	0	0	0.6429	0	0	0	0	0	0.0056	0	0	0	0	0	0.0127	0	0	0	0	0	0	0
chrXI	136971	T	A	10	2	YKL165C-A	YKL165C	NONE	NONE	0	0	0	0	0	0	0	0	0	0	0	0	0	0	0	0	0	0	0	0	0	0	0	0	0	0	0	0	0	0	0	0	0	0	0	0	0	0	0	0
chrXI	141045	C	G	10	1	YKL165C	YKL164C	tE(UUC)K	EXON	0	0	0	0	0	0	0	0	0	0	0	0	0	0	0	0	0	0	0	0	0	0	0	0	0	0	0	0	0	0	0	0	0	0	0	0	0	0	0	0
chrXI	141608	A	T	0.9478	1	tE(UUC)K	YKL164C	NONE	NONE	0	0	0	0	0	0	0	0	0	0	0	0	0	0	0	0	0	0	0	0	0	0	0	0	0	0	0	0	0	0	0	0	0	0	0	0	0	0	0	0
chrXI	142361	T	G	0.9808	1	tE(UUC)K	YKL162C-A	YKL164C	NON_SYNONYMOUS_CODING	0	0	0	0	0	0	0	0	0	0	0	0	0	0	0	0	0	0	0	0	0	0	0	0	0	0	0	0	0	0	0	0	0	0	0	0	0	0	0	0
chrXI	161670	C	T	10	1	YKL155C	tR(UCU)K	YKL154W	NON_SYNONYMOUS_CODING	0	0	0	0	0	0	0	0	0	0	0	0	0	0	0	0	0	0	0	0	0	0	0	0	0	0	0	0	0	0	0	0	0	10	0	0	0	0	0	0
chrXI	161720	C	A	0.9925	1	YKL155C	tR(UCU)K	YKL154W	NON_SYNONYMOUS_CODING	0	0	0	0	0	0	0	0	0	0	0	0	0	0	0	0	0	0	0	0	0	0	0	0	0	0	0	0	0	0	0	0	0	0	0	0	0	0	0	0
chrXI	169408	G	A	10	1	YKL149C	YKL150W	YKL148C	NON_SYNONYMOUS_CODING	0	0	0	0	0	0	0	0	0	0	0	0	0	0	0	0	0	0	0	0	0	0	0	0	0	0	0	0	0	0	0	0	0	0	0	0	0	0	0	0
chrXI	170176	C	G	10	1	YKL149C	YKL147C	YKL148C	NON_SYNONYMOUS_CODING	0	0	0	0	0	0	0	0	0	0	0	0	0	0	0	0	0	0	0	0	0	0	0	0	0	0	0	0	10	0	0	0	0	0	0	0	0	0	0	0
chrXI	172883	A	G	10	1	YKL147C	YKL144C	YKL146W	NON_SYNONYMOUS_CODING	0	0	0	0	10	0	0	0	0	0	0	0	0	0	0	0	0	0	0	0	0.01	0.0058	0	0	0	0.0069	0	0	0	0	0	0	0	0	0	0	0	0	0	0
chrXI	174941	C	T	10	1	YKL145W-A	YKL144C	YKL145W	NON_SYNONYMOUS_CODING	0	0	0.0133	0	0	0	0	0	0	0	0	0	0	0	0	0	0	0	0	10	0	0	0	0	0	0	0	0	0	0	0	0	0	0	0	0	0	0	0	0
chrXI	180188	A	G	0.9899	1	YKL140W	YKL142W	YKL141W	NON_SYNONYMOUS_CODING	0	0	0	0	0	0	0	0	0	0	0	0	0	0	0	0	0	0	0	0	0	0.0079	0	0	0	0	0	0	0.9899	0	0	0	0	0	0	0	0	0	0	0
chrXI	197929	A	T	10	1	YKL130C	YKL128C	YKL129C	SYNONYMOUS_CODING	0	0	0	0	0	0	0	0	0	0	0	0	0	0	0	0	0	0	0	0	0	0	0	0	0	0	0	0	0	0	0	0	0	0	0	0	0	0	0	0
chrXI	203062	G	C	10	1	YKL127W	tK(CUU)K	NONE	NONE	0	0	0	0	0	0	0	0	0	0	0	0	0	0	0	0	0	0	0	0	0	0	0	0	0	0	10	0	0	0	0	0	0	0	0	0	0	0	0	0
chrXI	203452	C	G	10	1	YKL126W	tK(CUU)K	YKL127W	NON_SYNONYMOUS_CODING	0	0	0	0	0	0	0	0	0	0	0	0	0	0	10	0	0	0	0	0	0	0	0	0	0	0	0	0	0	0	0	0	0	0	0	0	0	0	0	0
chrXI	207378	T	G	0.4316	0	YKL125W	YKL127W	YKL126W	SYNONYMOUS_CODING	0	0	0	0	0	0	0	0	0	0	0	0	0	0	0	0	0	0	0	0	0	0	0	0	0	0	0	0	0	0	0	0	0	0	0	0.0057	0	0	0	0
chrXI	211156	C	T	10	1	YKL123W	YKL122C	YKL124W	NON_SYNONYMOUS_CODING	0	0	0	0	0	0	0	0	0	0	0	0	0	0	0	0	0	0	0	0	0	0	0	0	0	0	0	0	0	0	0	0	0	0	0	0	0	0	0	0
chrXI	215367	A	G	0.4359	0	YKL120W	YKL119C	YKL121W	NON_SYNONYMOUS_CODING	0	0	0	0	0	0	0	0	0	0	0	0	0	0	0	0	0	0	0	0	0.4359	0	0	0	0	0	0	0	0	0	0	0	0	0	0	0	0	0	0	0
chrXI	226034	C	G	10	1	YKL112W	YKL111C	NONE	NONE	0	0	0	0	0	0	0	0	0	0	0	0	0	0	0	0	0	0	0	0	0	0	0	0	0	0	0	0	0	0	0	0	0	0	0	0	0	0	10	0
chrXI	227801	C	T	10	1	YKL113C	YKL111C	YKL112W	NON_SYNONYMOUS_CODING	0	0	0	0	0	0	0	0	0	0	0	0	0	0	0	0	0	0	0	10	0	0	0	0	0	0	0	0	0	0	0	0	0	0	0	0	0	0	0	0
chrXI	229221	T	C	0.9605	1	YKL111C	YKL112W	YKL110C	NON_SYNONYMOUS_CODING	0	0	0	0	0	0	0	0	0	0	0	0	0	0	0	0	0	0	0	0	0	0	0	0	0	0	0	0	0	0.0066	0.9605	0	0	0	0	0	0	0	0	0
chrXI	229655	C	A	0.995	1	YKL110C	YKL112W	NONE	NONE	0	0	0	0.0052	0	0	0	0	0	0	0	0	0	0	0	0	0	0	0	0	0	0	0	0	0	0	0	0	0	0	0	0	0	0	0	0	0	0	0	0
chrXI	234103	G	A	0.9807	1	YKL107W	YKL109W	YKL108W	NON_SYNONYMOUS_CODING	0	0	0	0	0	0	0	0	0	0	0	0	0	0	0	0	0	0	0	0	0	0.0076	0	0	0	0	0	0	0	0	0	0	0	0	0	0	0	0	0	0
chrXI	246579	G	C	10	1	YKL104C	YKL102C	YKL103C	NON_SYNONYMOUS_CODING	0	0	0	0	0	0	10	0	0	0	0	0	0	0	0	0	0	0	0	0	0	0	0	0	0	0	0	0	0	0	0	0	0	0	0	0	0	0	0	0
chrXI	247997	G	A	10	1	YKL101W	NONE	YKL102C	SYNONYMOUS_CODING	0	0	0	0	0	0	0	0	0	0	0	0	0	0	0	10	0	0	0	0	0	0	0	0	0	0	0	0	0	0	0	0	0	0	0	0	0	0	0	0
chrXI	253994	A	T	10	1	YKL098W	YKL100W-A	YKL100C	NON_SYNONYMOUS_CODING	0	0	0	0	0	0	0	0	0	0	0	0	0	0	0	0	0	10	0	0	0	0	0.0065	0.0056	0	0	0	0	0	0	0	0	0	0	0	0	0	0	0	0
chrXI	274081	A	G	0.6897	0	YKL088W	YKL090W	YKL089W	SYNONYMOUS_CODING	0	0	0	0	0	0	0	0	0	0	0	0	0	0	0	0	0	0	0	0	0	0	0	0	0	0	0	0	0	0	0	0	0	0	0	0	0	0	0	0
chrXI	274749	C	G	10	1	YKL088W	YKL089W	NONE	NONE	0	0	0	0	10	0	0	0	0	0	0	0	0	0	0	0	0.0055	0	0	0.006	0	0	0	0	0	0	0	0	0	0	0	0	0	0.0077	0	0	0	0	0	0
chrXI	285137	C	G	10	1	YKL079W	YKL081W	YKL080W	NON_SYNONYMOUS_CODING	0	0	0	0	0	0	0	0	10	0	0	0	0	0	0	0	0	0	0	0	0	0	0	0	0	0	0	0	0	0	0	0	0	0	0	0	0	0	0	0
chrXI	289598	C	G	0.994	1	YKL077W	YKL079W	YKL078W	SYNONYMOUS_CODING	0	0	0	0	0	0	0	0	0	0	0	0	0.994	0.0195	0	0	0	0	0	0	0	0	0	0	0	0	0	0	0	0	0	0	0	0	0	0	0	0	0	0
chrXI	290346	C	A	10	1	YKL077W	YKL079W	YKL078W	NON_SYNONYMOUS_CODING	0	0	0	10	0	0	0	0	0	0	0	0	0	0	0	0	0	0	0	0	0	0	0	0	0	0	0	0	0	0	0	0	0.0052	0	0	0	0	0	0	0
chrXI	296476	T	C	0.9952	1	YKL074C	YKL077W	YKL073W	SYNONYMOUS_CODING	0	0	0	0	0	0	0	0	0	0	0.004	0	0.9952	0.0593	0	0	0	0	0	0	0	0	0	0	0	0	0	0	0	0	0	0	0	0	0	0	0	0	0	0
chrXI	299701	G	A	10	1	tW(CCA)K	YKL073W	YKL072W	NON_SYNONYMOUS_CODING	0	0	0	0	0	0	0	0	0	0	0	0	10	0.0273	0	0	0	0	0	0	0	0	0	0	0	0	0	0	0	0	0	0	0	0	0	0	0	0	0	0
chrXI	302508	G	A	0.9857	1	tW(CCA)K	YKL072W	NONE	NONE	0	0	0.0058	0	0	0	0	0	0	0.9857	0	0	0	0	0	0	0	0	0	0	0	0	0	0	0	0	0	0	0	0	0	0	0	0	0	0	0	0	0	0
chrXI	304067	C	T	10	1	YKL071W	tW(CCA)K	NONE	NONE	0	0	0	0	0	0	0	0	0	0	0	0	0	0	0	0	0	0	10	0	0	0	0	0.0068	0	0	0	0	0	0	0	0	0	0	0	0	0	0	0	0
chrXI	306817	G	T	10	1	YKL069W	YKL070W	NONE	NONE	0.0037	0	0	0	0	0	0	0	0	0	0	0	0	0	0	10	0	0	0	0	0	0	0	0	0	0	0	0	0	0	0	0	0	0	0	0	0	0	0	0
chrXI	306885	C	A	10	1	YKL069W	YKL070W	NONE	NONE	0	0	0	0	0	0	0	0	0	0	0	0	0	0	0	0	0	0	0	0	0	0	0	0	0	0	0	0	0	0	0	0	0	0	0	0	0	0	0	0
chrXI	307821	G	C	10	1	YKL068W-A	YKL069W	tV(AAC)K1	EXON	0	0	0	0	0	0	0	0	0	10	0	0	0	0	0	0	0	0	0	0	0	0	0	0	0	0	0	0	0	0	0	0	0	0	0	0	0	0	0	0
chrXI	309777	G	T	10	1	YKL068W	YKL068W-A	NONE	NONE	0	0	0	0	0	0	0	0	0	0	0	0	0	0	0	0	0	0	0	0	0	0	0	0	0	0	0	0	0	0	0	0	0	0	0	0	0	10	0	0
chrXI	310225	G	A	10	1	tV(AAC)K1	YKL068W-A	YKL068W	NON_SYNONYMOUS_CODING	0	0	0	0	0	0	0	0	0	0	0	0	0	0	0	0	0	0	0	0	0	0	0	0	0	0	0	10	0	0	0	0	0	0.0048	0	0	0	0	0	0
chrXI	317318	G	T	10	1	YKL064W	YKL065W-A	NONE	NONE	0	0	0	0	0	0	0	0	0	0	0	0	0	0	0	0	0	0	0	0	0	0	0	10	0.0046	0	0	0	0	0	0	0	0	0	0	0	0	0	0	0
chrXI	318446	T	A	10	1	YKL065C	YKL063C	YKL064W	NON_SYNONYMOUS_CODING	0	0	0	0	0	0	0	0	0	0	0	0	0	0	0	0	0	0	0	0	0	0	0	0	0	0	0	0	0	0	0	0	0	0	0	0	0	0	0	0
chrXI	332120	G	T	0.9874	1	YKL059C	YKL056C	YKL057C	NON_SYNONYMOUS_CODING	0	0	0	0	0	0	0	0	0	0	0	0	0	0	0	0	0	0	0	0	0	0	0	0	0	0	0	0	0	0	0	0	0	0	0	0.9874	0	0	0	0
chrXI	338030	G	C	10	1	YKL053W	YKL053C-A	YKL054C	NON_SYNONYMOUS_CODING	0	0	0	0	0	0	0	0	0	0	0	0	0	0	0	0	0	0	0	0	0	0	10	0	0	0	0	0	0	0	0	0	0	0	0	0	0	0	0	0
chrXI	342132	C	A	0.9804	1	YKL052C	YKL051W	NONE	NONE	0	0	0.0046	0	0	0	0	0	0	0	0	0	0	0	0	0	0	0	0	0	0	0	0	0	0	0	0	0	0	0	0	0	0	0	0	0	0	0.0049	0	0
chrXI	349975	A	G	0.9951	1	YKL048C	YKL046C	YKL047W	NON_SYNONYMOUS_CODING	0	0	0	0	0	0	0	0	0	0	0	0	0	0	0	0	0	0	0	0	0	0	0	0	0	0	0	0	0	0	0	0	0	0	0	0	0	0	0	0
chrXI	356511	C	G	10	1	YKL042W	YKL044W	YKL043W	NON_SYNONYMOUS_CODING	0	0	0	0	0	0	0	10	0	0	0	0	0	0	0	0	0	0	0	0	0	0	0	0	0	0	0	0	0	0	0	0	0	0	0	0	0	0	0	0
chrXI	366189	A	G	10	1	YKL037W	snR69	YKL038W	SYNONYMOUS_CODING	0	0	0	0	0	0	0	0	0	0	0	0	0.0081	0	0	0	0	0	0	0	0	0	0	0	0	0	0.0053	0	0	0	0	0	0	0	0	0	0	0	0	0
chrXI	367210	C	A	10	1	YKL037W	YKL036C	YKL038W	NON_SYNONYMOUS_CODING	0	0	0	0	0	0	0	0	0.0078	0	0	10	0	0	0	0	0	0	0	0	0	0	0.0078	0	0	0	0	0	0	0	0	0	0	0	0	0	0	0	0	0
chrXI	374194	G	C	10	1	YKL033W	YKL034W	YKL033W-A	NON_SYNONYMOUS_CODING	0	0	0	0	0	0	0	0	0	0	0	0	0	0	0	0	0	0	0	0	0	0	0	0	0	0	0	0	0	0	0	0	0	0	0	0	0	0	0	0
chrXI	380627	T	A	10	1	YKL031W	tV(AAC)K2	YKL032C	NON_SYNONYMOUS_CODING	0	0	0	0	0	0	0	0	0	0	0	0	0	0	0	0	0	0	0	0	0	0	0	0	0	0	0	0	0	0	0	0	0	0	0	0	0	0	0	0
chrXI	385907	A	G	10	1	YKL027W	YKL026C	YKL028W	SYNONYMOUS_CODING	0	0	0	0	0	0	0	0	0	0	0	0	0	0	0	0	0	0	0	0	0	0	0	0	0	0	0	0	0	0	0	0	0	0	0	0	0	0	0	0
chrXI	393802	C	G	10	1	YKL023C-A	YKL022C	YKL023W	NON_SYNONYMOUS_CODING	0	0	0	0	0	0	0	0	0	0	0	0	0	0	0	0	0	0	0	0	0	0	0	0	0	0	0	0	0	10	0	0	0	0	0	0	0	0	0	0
chrXI	400178	C	A	0.9889	1	YKL021C	YKL018C-A	YKL020C	NON_SYNONYMOUS_CODING	0	0	0	0	0	0	0.006	0	0	0	0	0	0	0	0.0052	0.0042	0	0	0	0	0.0095	0	0	0	0	0	0	0	0	0	0	0	0	0	0	0.9889	0	0	0	0
chrXI	402375	A	C	10	1	YKL020C	YKL018C-A	YKL019W	SYNONYMOUS_CODING	0	0	0	0	0	0	0	0	0	0	0	0	0	0	0	0	0	0	0	0	0	0	0	0	0	0	0	0	0	0	0	0	0	0	0	0	0	0	0.0071	0
chrXI	403486	A	G	10	1	YKL018W	YKL019W	YKL018C-A	SYNONYMOUS_CODING	0	0	0	0	0	0	0	0	0	0	0	0	0	0	0	0	0	0	0	0	0	0	0	0	0	0	0	0	0	0	0	0	0	0.0093	0	10	0	0	0	0
chrXI	403510	T	C	10	1	YKL018W	YKL019W	YKL018C-A	NON_SYNONYMOUS_CODING	0	0	0	0	0	0	0	0	0	0	0	0	0	0	0	0	10	0	0	0	0	0	0	0	0	0	0	0	0	0	0	0	0	0	0	0	0	0	0	0
chrXI	407585	G	A	10	1	YKL015W	YKL018W	YKL016C	SYNONYMOUS_CODING	0	0	0	0	0	0	0	0	0	0	0	0	0	0	0	0	0	0	0	0	0	0	0	0	0	0	0	0	0	0	0	0	0	0	0	0	0	0	0	0
chrXI	408914	C	T	10	1	YKL016C	YKL014C	YKL015W	NON_SYNONYMOUS_CODING	0	0	0	0	0	0	0	0	0	0	0	0	0	0	10	0	0	0	0	0	0	0	0	0	0	0	0	0	0	0	0	0	0	0	0	0	0	0	0	0
chrXI	412768	T	C	10	1	NONE	YKL015W	YKL014C	SYNONYMOUS_CODING	0	0	0	0	0	0	0	0	0	0	0	0	0	0	0	0	0	0	0	0	0	0	0	0	0	0	0	0	0	0	0	0	0	0	0	0	0.0045	0	0	0
chrXI	412947	T	G	0.9935	1	NONE	YKL015W	YKL014C	NON_SYNONYMOUS_CODING	0	0	0	0	0	0	0	0	0	0	0	0	0	0	0	0	0	0	0	0	0	0	0	0	0	0	0	0	0	0	0	0	0	0	0	0	0	0	0	0
chrXI	414292	G	T	10	1	YKL012W	YKL013C	YKL014C	NON_SYNONYMOUS_CODING	0	0	0	0	0	0	0	0	0	0.0123	0	0	0	0	0	0	10	0	0	0	0	0	0	0	0	0	0	0	0	0	0	0	0	0	0	0	0	0	0	0
chrXI	422267	T	C	10	1	YKL011C	YKL012W	YKL010C	SYNONYMOUS_CODING	0	0	0	0	0	0	0	0	0	0	0	0	0	0	0	0	0	0	0	0	0	0	0	0	0	0	0	0	0	0	0	0	0	0	0	0	0	0	0	0
chrXI	448514	G	T	10	6	YKR004C	YKR006C	YKR005C	NON_SYNONYMOUS_CODING	0	0	0	0	0	0	0	0	0	0	0	0	0	0	0	0	0	0	0	0	0	0	0	0	0	0	0	0	0	0	0	0	0	0	0	0	0	0	0	0
chrXI	451528	A	G	0.41	0	YKR008W	YKR009C	YKR007W	NON_SYNONYMOUS_CODING	0	0	0	0	0	0	0	0	0	0	0	0	0	0	0	0	0	0	0	0	0.41	0	0	0	0	0	0	0	0	0	0	0	0	0	0	0	0	0	0	0
chrXI	452900	C	A	10	1	YKR006C	YKR009C	YKR008W	NON_SYNONYMOUS_CODING	0	0	0	0	0	0	0	0	0	0	0.0052	0	0	0	0	0	0	0	0	0	0	0.0051	0	0	0	0	0	0	0	0	0	0	0	0	0	0	0	0	0	0
chrXI	453788	T	A	0.9926	1	YKR006C	YKR008W	NONE	NONE	0	0	0	0	0	0	0	0	0	0	0	0	0	0	0	0	0	0	0	0	0	0	0	0	0	0	0	0	0	0	0	0	0	0	0	0	0	0	0	0
chrXI	459594	T	C	10	1	YKR009C	tL(CAA)K	YKR010C	NON_SYNONYMOUS_CODING	0	0	0	0	0	0	0	0	0	0	0	0	0	0	0	0	0	0	0	0	0	0	0	0	0	0	0	0	0	0	0	0	0	0	0	0	0	0	0	0
chrXI	475125	A	T	0.9922	1	YKR017C	YKR019C	YKR018C	NON_SYNONYMOUS_CODING	0	0	0	0	0	0	0	0	0	0	0	0	0	0	0	0	0	0	0	0	0	0	0	0	0	0	0	0	0	0	0	0	0	0	0	0	0	0	0	0
chrXI	478061	C	A	10	1	YKR019C	YKR022C	YKR020W	NON_SYNONYMOUS_CODING	0	0	0	10	0	0	0	0	0	0	0	0	0	0	0	0	0	0	0	0	0	0	0	0	0	0	0	0	0	0	0	0	0	0	0	0	0	0	0.0071	0
chrXI	507370	A	G	10	1	YKR035W-A	YKR034W	NONE	NONE	0	0	0	0	0	0	0	0	0	0	0	0	0	0	0	0	0	0	0	0	0	0	0	0	0	0	0	0	0	0	0	0	0	0	0	0	0	0	0	0
chrXI	508749	G	C	10	1	YKR035C	YKR035W-A	YKR036C	SYNONYMOUS_CODING	0.0032	0	0	0	0	0	0	0	0	0	0	0	0	0	0	0	0	0	0	0	0	0	0	0	0	0	0	0	0.0053	0	0	0	0	0	0	0	0	0	0	0
chrXI	521723	T	C	10	1	YKR043C	YKR045C	YKR044W	NON_SYNONYMOUS_CODING	0	0	0	0	0	0.0053	0	0	0	0	0	0	0	0	0	0	0	0	0	0	0	0	0	0.0076	0	0	0	0	0	0	0	0	0.0071	0	0	0	0	0	0	10
chrXI	532656	C	A	10	1	NONE	YKR051W	YKR052C	NON_SYNONYMOUS_CODING	0	0	0	0	0	0	0	0	0	10	0	0	0	0	0	0	0	0	0	0	0	0.0055	0	0	0	0	0	0	0	0	0	0	0	0	0	0	0	0	0	0
chrXI	542925	A	G	0.9464	1	YKR055W	NONE	YKR054C	NON_SYNONYMOUS_CODING	0	0	0	0	0	0	0	0	0	0	0	0	0	0	0	0	0	0	0	0	0	0	0	0	0	0	0	0	0	0	0	0	0	0	0	0	0	0	0	0
chrXI	546204	T	A	10	1	YKR055W	NONE	YKR054C	NON_SYNONYMOUS_CODING	0	0	0	0	0	0	0	0	0	0	0	0	0	0	0	0	0	0	0	0	0	0	0	0	0	0	0	0	0	10	0	0	0	0	0	0	0	0	0	0
chrXI	552720	C	T	0.6623	0	YKR059W	YKR057W	YKR058W	SYNONYMOUS_CODING	0	0	0	0	0	0	0	0	0	0	0	0	0	0	0	0	0	0	0	0	0	0	0	0	0	0	0	0	0	0	0	0	0	0	0	0	0	0	0	0
chrXI	555719	T	C	10	1	YKR060W	YKR058W	YKR059W	NON_SYNONYMOUS_CODING	0	0	0	0	0.009	0	0	0	10	0	0	0	0	0	0	0	0	0	0	0	0	0	0	0	0	0	0	0	0	0	0	0	0	0	0	0	0	0	0	0
chrXI	560196	A	G	10	1	snR42	YKR063C	YKR062W	NON_SYNONYMOUS_CODING	0	0	0	0	0	0	0	0	0	0	0	0	0	0	0	0	0	0	0	0	0	0	0	0	0	0	0	0	0	0	0	0	0	0	0	0	0	0	0	0
chrXI	562191	G	T	10	1	YKR063C	YKR062W	YKR064W	START_LOST	0	0	0	0	0	0	0	0	0	0	0	0	0	0	0	0	0	0	0	0	0	0	0	0	0.0041	0	0	0	0	0	0	0	0	0	0	0	0	0	0	0
chrXI	563731	T	C	10	1	YKR063C	YKR065C	YKR064W	SYNONYMOUS_CODING	0	0	0	0	0	0	0	0	0	0	0	0	10	0.0549	0	0	0	0	0	0	0	0	0	0	0	0	0	0	0	0	0	0	0	0	0	0	0	0	0	0
chrXI	566218	T	C	10	1	YKR065C	YKR064W	YKR066C	NON_SYNONYMOUS_CODING	0	0	0	0	0.0074	0	0	0	0	0	0	0	0	0	0	0	0	0	0	0	0	0	0	0	0	0	0	0	0	0	0	0	0	0	0	0	10	0	0	0
chrXI	571601	C	G	0.5691	0	YKR068C	YKR067W	YKR069W	NON_SYNONYMOUS_CODING	0	0	0	0	0	0	0	0	0	0	0	0	0	0	0	0	0	0	0	0	0	0	0	0	0	0	0	0	0	0	0	0	0	0	0	0	0	0	0	0
chrXI	571973	T	C	10	1	YKR070W	YKR067W	YKR069W	SYNONYMOUS_CODING	0	0	0	0	0	0	0	0	0	0	0	0	0	0.0046	0	0	0	0	0	0	0	0	0	0	0	0	0	0	0	0	0	0	0.0054	0	0	0	0	0	0	0
chrXI	573592	A	T	0.9869	1	YKR068C	YKR069W	YKR070W	NON_SYNONYMOUS_CODING	0	0	0	0	0	0	0	0	0	0	0	0	0	0	0	0	0	0	0	0	0	0	0	0	0	0	0	0	0	0	0	0	0	0	0	0	0	0	0	0
chrXI	575476	G	A	10	1	tK(UUU)K	YKR072C	YKR071C	SYNONYMOUS_CODING	0	0	0	0	0	0	0	0	0	0	0	0	0	0	0	0	0	0	0	0	0	0	0	0	0	0	0	0	0	0	0	0	0	0	0	0	0	0	0	0
chrXI	577681	T	C	10	1	tK(UUU)K	YKR073C	YKR072C	NON_SYNONYMOUS_CODING	0	0	0	0	0	0	0	0	0	0	0	0	0	0	0	0	0	0	0	0	0	0	0	10	0	0	0	0	0.0083	0	0	0	0	0	0	0	0	0	0	0
chrXI	579909	C	A	10	1	YKR073C	YKR074W	YKR075C	STOP_GAINED	0	0	0	0	0	0	0	0	0	0	0	0	0	0	0	0	0	0	0	0	0	10	0	0	0	0	0	0	0	0	0	0	0	0.0046	0	0	0	0	0	0
chrXI	582169	T	A	0.9956	1	YKR077W	YKR075W-A	YKR076W	STOP_GAINED	0	0	0	0	0	0	0	0.9956	0	0	0	0	0	0	0	0	0	0	0	0	0	0	0	0	0	0	0	0	0	0	0	0	0	0	0	0	0	0	0	0
chrXI	582982	T	A	10	1	YKR077W	YKR075W-A	YKR076W	NON_SYNONYMOUS_CODING	0	0	0	0	0	0	0	0	0	0	0	0	0	0	0	0	0	0	0	0	0	0	0	0	0	0	0	0	0	0	0	0	0	0	0	0	0	0	0	0
chrXI	588989	T	C	10	1	YKR079C	YKR081C	NONE	NONE	0	0	0	0	0	0	0	0	0	0	0	0	0	0	10	0	0	0	0	0	0	0	0	0	0	0	0	0	0	0	0	0	0	0	0	0	0	0	0	0
chrXI	592585	T	G	10	1	YKR081C	YKR080W	YKR082W	NON_SYNONYMOUS_CODING	0	0	0	0	0	0	0	0	0	0	0	0	0	0	0	0	0	0	0	0	0	0	0	0	0	0	0	0	0	0	0	0	0	0	0	0	0	0	0	0
chrXI	594833	C	A	10	1	YKR081C	YKR083C	YKR082W	NON_SYNONYMOUS_CODING	0	0	0	0	0	0	0	0	0	0	0	0	0	0	0	0	0	0	0	0	0	0	0	0	0	0	0	0	0	0	0	0	0	0	0	0	0	0	0	0
chrXI	598650	G	C	0.9937	1	YKR084C	YKR085C	NONE	NONE	0	0	0	0	0	0	0	0	0	0	0	0	0	0	0.9937	0	0	0	0	0	0	0	0	0	0	0	0	0	0	0	0	0	0	0	0	0	0	0	0	0
chrXI	599031	G	T	0.987	1	YKR086W	YKR082W	YKR085C	NON_SYNONYMOUS_CODING	0	0	0	0	0	0	0	0	0	0	0	0	0	0	0	0.0037	0	0	0	0	0	0	0	0	0	0	0	0	0	0.987	0	0	0	0	0	0	0	0	0	0
chrXI	603618	G	T	10	1	YKR085C	YKR088C	YKR087C	NON_SYNONYMOUS_CODING	0	0	0	0	0	0	0	0	0	0	0	0	0	0	10	0	0	0	0	0	0	0	0	0	0	0	0	0	0	0	0	0	0	0	0	0	0.0061	0	0	0
chrXI	604090	T	G	0.9928	1	YKR087C	YKR089C	YKR088C	NON_SYNONYMOUS_CODING	0	0	0	0	0	0	0	0	0	0	0	0	0	0	0	0	0	0	0	0.0076	0	0	0.007	0	0	0	0	0	0	0	0	0	0	0	0	0	0	0	0	0
chrXI	622414	A	G	10	1	YKR095W-A	NONE	YKR095W	NON_SYNONYMOUS_CODING	0	0	0	0	0	0	0	0	0	0	0	0	0	0	0	0	0	0	0	0	0	0	0	0	0	0	0	0	0	0	0	0	0	0	0	0	0	0	0	0
chrXI	624629	C	G	10	1	YKR095W-A	NONE	YKR095W	NON_SYNONYMOUS_CODING	0	0	0	0	0	0	0	0	0	0	0	0	0	0	0	0.0048	0	0	0	0	0	0	0	0	0	10	0	0	0	0	0	0	0	0	0	0	0	0	0	0
chrXI	633456	C	G	10	1	YKR099W	YKR097W	YKR098C	SYNONYMOUS_CODING	0	0	0	0	0	0	0	0	0	0	0	0	0	0	0.0047	0	0	0	0	0	0	0	0	0	0	0	0	0	0	0	0	0	0	0	0	0	0	0	0	0
chrXI	641178	C	A	0.9944	1	YKR100C	YKR099W	YKR101W	NON_SYNONYMOUS_CODING	0	0	0	0	0	0	0	0	0	0	0	0	0	0	0	0	0	0	0	0	0	0	0	0	0	0	0	0.0047	0	0	0	0	0	0	0	0	0	0.0054	0	0
chrXI	641945	A	G	0.6053	0	YKR100C	YKR099W	YKR101W	NON_SYNONYMOUS_CODING	0	0	0	0	0	0	0	0	0	0	0	0	0	0	0	0	0	0	0	0	0	0	0	0	0	0.0074	0	0	0	0	0	0	0	0	0	0	0	0	0	0
chrXI	642370	A	G	10	1	YKR100C	YKR101W	NONE	NONE	0	0	0	0	0	0	0	0	0	0	10	0	0	0	0	0	0	0	0	0	0	0	0	0	0	0	0	0	0	0	0.0056	0	0	0	0	0	0	0	0	0
chrXII	16290	T	G	0.484	0	YLL063C	YLL062C	NONE	NONE	0	0	0	0	0	0	0	0	0	0	0	0	0	0	0	0	0	0	0	0	0.484	0	0	0	0	0	0	0	0	0	0	0	0	0	0	0	0	0	0	0
chrXII	17305	A	G	0.5152	0	YLL061W	YLL060C	YLL062C	SYNONYMOUS_CODING	0	0.5152	0	0	0	0	0	0	0	0	0	0	0	0	0	0	0	0	0	0	0	0	0	0	0	0	0	0	0	0	0	0	0	0	0	0	0	0	0.003	0
chrXII	18851	G	T	0.4789	0	YLL062C	YLL060C	YLL061W	NON_SYNONYMOUS_CODING	0	0	0	0	0	0	0	0	0	0	0	0	0	0	0	0	0	0	0	0	0	0.0065	0	0	0	0	0	0	0	0	0	0	0	0	0	0	0	0	0	0
chrXII	20229	T	C	0.4749	0	YLL062C	YLL061W	NONE	NONE	0	0	0	0	0	0	0	0	0	0	0	0.0033	0	0	0	0	0	0.4749	0	0	0	0	0	0	0	0	0	0	0	0	0	0	0	0	0	0	0	0	0	0
chrXII	24849	G	T	0.9954	1	YLL059C	YLL057C	YLL058W	NON_SYNONYMOUS_CODING	0	0	0	0	0	0	0	0	0.9954	0	0	0	0	0	0	0	0	0	0	0	0	0	0	0	0	0	0	0	0	0	0	0	0.0025	0	0	0	0	0	0	0
chrXII	25832	G	A	0.4536	0	YLL059C	YLL058W	YLL057C	NON_SYNONYMOUS_CODING	0	0	0	0	0	0	0	0	0	0	0	0	0	0	0	0	0	0	0	0	0	0	0	0	0	0	0	0	0	0	0	0	0	0	0	0	0	0	0	0
chrXII	29365	G	C	0.5273	0	YLL055W	YLL054C	NONE	NONE	0	0	0	0	0	0	0	0	0	0	0	0	0	0	0	0	0	0	0	0	0	0	0	0	0	0	0	0	0	0	0	0	0	0	0	0	0	0	0	0
chrXII	32912	A	T	10	1	YLL056C	YLL055W	YLL054C	NON_SYNONYMOUS_CODING	0	0	0	0	0	0	0	0	0	0	0	0	0	0	0	0	0	0	0	0	0	0	0	0	0	0	0	0	0	0	0	0	0	0	0	0	0	0	0	0
chrXII	39299	A	T	0.4633	0	YLL049W	YLL050C	YLL051C	NON_SYNONYMOUS_CODING	0	0	0	0	0	0	0	0	0	0	0	0	0	0	0	0	0	0	0	0	0	0	0	0	0	0	0	0	0	0	0	0	0	0	0	0	0	0	0	0
chrXII	41432	T	C	0.4643	0	YLL050C	YLL049W	YLL048C	SYNONYMOUS_CODING	0	0	0	0	0	0	0	0	0	0	0	0	0	0	0	0	0	0	0	0	0	0	0	0	0	0	0	0	0	0	0	0	0	0	0	0	0	0	0	0
chrXII	44721	C	T	0.4478	0	YLL047W	YLL046C	YLL048C	NON_SYNONYMOUS_CODING	0.0053	0	0	0	0	0	0	0	0	0	0	0	0	0	0	0	0	0	0	0	0	0	0	0	0	0	0	0	0	0	0	0.0046	0.0037	0.4478	0	0	0	0	0	0
chrXII	47709	G	C	0.474	0	YLL046C	YLL045C	NONE	NONE	0	0	0	0	0	0	0	0	0	0	0	0	0	0	0	0	0	0	0	0	0	0	0	0	0	0	0	0	0	0	0	0	0	0	0	0	0	0	0	0
chrXII	50561	A	T	0.4764	0	YLL045C	YLL042C	YLL043W	NON_SYNONYMOUS_CODING	0	0	0	0	0	0	0	0	0	0	0	0	0	0	0	0	0	0.4764	0	0	0	0	0	0	0	0	0	0	0	0	0	0	0	0	0	0	0	0	0	0
chrXII	50685	A	G	0.5057	0	YLL045C	YLL042C	YLL043W	NON_SYNONYMOUS_CODING	0	0	0	0	0	0.5057	0	0	0	0	0	0	0	0	0	0	0	0	0	0	0	0	0	0	0	0	0	0	0	0	0	0	0	0	0	0	0	0	0	0
chrXII	51101	T	A	0.5106	0	YLL045C	YLL042C	YLL043W	NON_SYNONYMOUS_CODING	0	0	0	0	0	0	0	0	0	0	0	0	0	0	0	0	0	0	0	0	0	0	0	0	0	0	0	0	0	0	0	0	0.006	0	0	0	0	0	0	0.5106
chrXII	51290	T	C	0.4519	0	YLL045C	YLL042C	YLL043W	NON_SYNONYMOUS_CODING	0	0	0	0	0	0	0	0	0	0	0	0	0	0	0	0	0	0	0	0	0	0	0	0	0	0	0	0	0	0	0	0	0	0	0	0	0	0	0	0
chrXII	52060	G	C	0.8916	1	YLL045C	YLL042C	NONE	NONE	0	0	0	0	0	0	0	0	0	0	0	0	0	0	0	0	0	0	0	0	0	0	0	0	0	0	0	0	0	0	0.8916	0	0	0.0044	0	0	0	0	0	0
chrXII	53625	T	G	0.4605	0	YLL042C	YLL040C	YLL041C	NON_SYNONYMOUS_CODING	0	0	0	0	0	0	0	0.0026	0	0	0	0	0.0028	0	0	0	0	0	0	0	0	0	0	0	0	0	0	0	0	0	0	0	0	0	0	0	0	0	0	0
chrXII	54077	C	A	0.4847	0	YLL041C	YLL040C	NONE	NONE	0	0	0	0	0	0	0	0	0	0	0	0	0.011	0	0	0	0	0.004	0	0	0	0	0	0	0	0	0	0	0	0	0	0	0	0	0	0	0	0	0	0
chrXII	55094	T	C	0.5337	0	YLL041C	YLL043W	YLL040C	NON_SYNONYMOUS_CODING	0	0	0	0	0	0	0	0.0027	0	0	0.0028	0	0	0	0	0	0	0	0	0	0	0	0	0	0	0	0	0	0	0	0	0	0	0.002	0	0	0	0.5337	0	0
chrXII	57365	G	A	0.4882	0	YLL041C	NONE	YLL040C	NON_SYNONYMOUS_CODING	0	0.4882	0	0.0023	0	0	0	0	0	0	0	0	0	0	0	0	0	0	0.0026	0	0	0	0	0	0	0	0	0	0	0	0	0	0	0	0	0	0	0	0	0
chrXII	64200	T	A	0.4864	0	YLL040C	YLL038C	YLL039C	NON_SYNONYMOUS_CODING	0	0	0	0	0	0	0	0	0	0	0	0	0	0	0	0	0	0	0	0	0	0	0	0	0	0	0	0	0	0	0	0	0	0	0	0	0	0	0	0
chrXII	64873	T	A	0.4956	0	YLL040C	YLL038C	YLL039C	NON_SYNONYMOUS_CODING	0	0	0	0	0	0	0	0	0	0	0	0	0	0	0	0	0	0	0	0	0	0	0	0	0	0	0	0	0	0	0	0	0	0	0	0	0	0	0	0
chrXII	65262	T	C	0.9899	1	YLL039C	YLL038C	NONE	NONE	0	0	0	0	0	0	0	0	0.9899	0	0	0	0	0	0	0	0	0	0	0	0	0	0	0	0	0	0	0	0	0	0	0	0	0	0	0	0	0	0	0
chrXII	67700	G	T	0.4885	0	YLL035W	YLL037W	YLL036C	NON_SYNONYMOUS_CODING	0	0	0	0	0	0	0	0.4885	0	0	0	0	0	0	0	0	0	0	0	0	0	0	0	0	0	0	0	0	0	0	0	0	0	0	0.0042	0	0	0	0.0037	0
chrXII	67880	G	A	0.5184	0	YLL035W	YLL037W	YLL036C	SYNONYMOUS_CODING	0	0	0	0	0	0	0	0	0	0	0	0	0	0	0	0	0	0.5184	0	0	0	0	0	0	0	0	0	0	0	0	0	0	0	0	0	0	0	0	0	0
chrXII	68523	T	C	0.4856	0	YLL035W	YLL037W	NONE	NONE	0	0	0	0	0	0	0	0	0.0049	0	0	0	0	0	0	0	0	0	0	0	0.004	0	0	0	0	0	0	0	0	0	0	0	0	0	0	0	0	0	0	0
chrXII	70110	G	A	0.5478	0	YLL036C	YLL034C	YLL035W	NON_SYNONYMOUS_CODING	0	0	0	0	0	0	0	0	0	0	0	0	0	0	0.0024	0	0	0	0.0034	0	0	0	0	0	0	0	0	0	0	0	0	0	0	0	0	0	0	0	0	0
chrXII	70412	A	T	0.456	0	YLL036C	YLL034C	YLL035W	STOP_GAINED	0	0	0	0	0	0	0	0.0033	0	0	0	0	0	0.456	0	0	0	0	0	0	0	0	0	0	0	0	0	0	0	0	0	0	0	0	0	0	0	0	0	0
chrXII	73286	G	A	0.4435	0	YLL033W	YLL032C	NONE	NONE	0	0	0	0	0	0	0	0	0	0	0	0	0	0	0	0	0	0	0	0	0	0	0	0	0	0	0	0	0	0	0	0	0	0	0	0	0	0	0.0029	0
chrXII	76380	A	G	0.4758	0	YLL034C	YLL031C	YLL032C	SYNONYMOUS_CODING	0	0	0	0	0	0	0	0	0	0	0	0.0026	0	0	0	0	0	0	0	0	0	0	0	0	0	0	0	0	0	0	0	0	0	0	0	0	0	0	0.0026	0
chrXII	77669	A	G	0.4535	0	YLL032C	YLL030C	YLL031C	SYNONYMOUS_CODING	0	0	0	0	0	0	0	0	0	0.0035	0	0	0	0	0	0	0	0	0	0	0	0	0	0	0	0	0	0	0	0	0	0	0	0	0	0	0	0	0	0
chrXII	80850	A	G	0.4805	0	YLL030C	NONE	NONE	NONE	0	0	0	0	0	0	0	0	0	0	0	0	0	0	0	0	0	0	0	0	0	0	0	0	0	0	0	0	0	0	0	0	0	0	0	0	0	0	0	0
chrXII	81846	T	C	0.4667	0	YLL030C	NONE	YLL029W	SYNONYMOUS_CODING	0	0	0	0	0	0	0	0	0	0	0	0	0	0	0	0	0	0	0	0	0	0	0	0	0	0	0	0	0	0	0	0	0	0	0	0	0	0	0.4667	0.0042
chrXII	85484	G	T	0.4549	0	YLL027W	YLL029W	YLL028W	NON_SYNONYMOUS_CODING	0	0	0	0	0	0	0	0	0	0	0	0	0.0042	0	0	0.0028	0	0	0	0	0.0047	0	0	0	0	0	0	0	0	0	0	0	0	0	0	0	0.0028	0	0	0
chrXII	87890	G	C	0.4797	0	YLL026W	YLL028W	YLL027W	NON_SYNONYMOUS_CODING	0	0	0.0062	0	0	0	0	0	0	0	0	0	0	0.4797	0	0	0	0	0	0	0	0	0	0	0	0	0	0	0	0	0	0	0	0	0	0	0	0	0	0
chrXII	88704	C	G	0.4492	0	tP(UGG)L	YLL027W	YLL026W	NON_SYNONYMOUS_CODING	0	0	0	0	0	0	0	0	0	0	0	0	0	0	0	0	0	0	0	0	0	0	0	0	0	0	0	0	0	0	0	0	0	0	0	0	0	0	0	0
chrXII	95409	G	A	0.4965	0	NONE	YLL024C	NONE	NONE	0	0	0	0	0	0	0	0	0	0	0	0	0	0.0036	0	0	0	0	0	0	0	0	0	0	0	0	0	0	0	0	0	0	0	0	0	0	0	0	0	0
chrXII	95698	T	C	0.4252	0	NONE	YLL025W	YLL024C	NON_SYNONYMOUS_CODING	0	0	0	0	0	0	0	0	0	0	0	0	0	0.4252	0	0	0	0	0	0	0	0	0	0	0	0	0	0	0	0	0	0	0	0	0	0	0	0	0	0
chrXII	95709	C	G	0.4246	0	NONE	YLL025W	YLL024C	NON_SYNONYMOUS_CODING	0	0	0	0	0	0	0	0	0	0	0	0	0	0.4246	0	0	0	0	0	0	0	0	0	0	0	0	0	0	0	0	0	0	0	0	0	0	0	0	0	0
chrXII	99657	C	A	0.5309	0	YLL023C	YLL025W	YLL022C	STOP_GAINED	0	0	0	0	0	0	0	0	0	0	0	0	0	0.0028	0	0	0	0	0	0	0	0	0	0	0	0	0	0	0	0	0	0	0	0	0	0	0	0	0	0
chrXII	102525	G	T	0.4849	0	YLL022C	YLL020C	YLL021W	NON_SYNONYMOUS_CODING	0	0	0	0	0	0	0	0	0	0	0	0	0	0	0	0	0	0	0	0	0	0.0052	0	0	0	0	0	0	0.0031	0	0	0	0	0	0	0	0	0	0	0
chrXII	102654	C	G	0.5198	0	YLL022C	YLL020C	YLL021W	NON_SYNONYMOUS_CODING	0	0	0	0	0	0	0.0033	0	0	0	0	0	0	0	0	0	0	0	0	0	0	0	0	0	0	0	0.0025	0	0	0	0	0	0	0	0	0	0	0	0	0
chrXII	103444	G	A	0.4541	0	YLL022C	YLL020C	YLL021W	SYNONYMOUS_CODING	0	0	0.0025	0	0	0	0	0	0.0039	0	0	0	0	0	0	0	0	0	0	0	0	0	0	0	0	0	0	0	0	0	0	0	0	0	0	0	0	0	0	0
chrXII	104323	C	T	0.4841	0	YLL019W-A	YLL020C	YLL021W	SYNONYMOUS_CODING	0	0	0	0	0	0	0	0	0	0	0	0	0	0	0	0	0	0	0	0	0	0	0	0	0	0	0	0	0	0	0	0	0	0	0	0	0	0	0	0
chrXII	107533	G	T	0.533	0	YLL020C	YLL019W-A	YLL019C	NON_SYNONYMOUS_CODING	0.0051	0	0	0	0	0	0	0	0	0	0	0	0	0	0	0.533	0	0	0	0	0	0	0	0	0	0	0	0	0	0	0	0	0	0	0	0	0	0	0	0
chrXII	107629	T	C	0.4813	0	YLL020C	YLL019W-A	YLL019C	SYNONYMOUS_CODING	0	0	0	0	0	0	0	0	0	0	0	0	0	0	0	0	0	0	0	0	0.0048	0	0	0	0	0	0	0	0	0	0	0	0	0	0	0	0	0	0	0.004
chrXII	116340	A	G	0.4561	0	YLL015W	YLL016W	NONE	NONE	0	0	0	0	0	0	0	0	0	0	0	0	0	0	0	0	0	0	0	0.4561	0	0	0	0	0	0	0	0	0	0	0	0	0	0	0	0	0	0	0	0
chrXII	123475	T	C	0.504	0	YLL012W	YLL014W	YLL013C	SYNONYMOUS_CODING	0	0.0035	0	0	0	0	0	0	0	0	0	0	0	0	0	0	0	0	0	0.0043	0	0	0	0	0	0	0	0	0	0	0	0	0	0	0	0	0	0	0	0
chrXII	125340	G	T	0.8523	1	YLL012W	YLL014W	NONE	NONE	0	0	0	0	0	0	0	0	0	0	0	0	0	0	0	0	0	0	0	0	0	0	0	0	0	0	0.0051	0	0	0	0	0	0	0	0	0	0	0	0	0
chrXII	127534	A	G	0.5013	0	YLL013C	YLL012W	YLL011W	NON_SYNONYMOUS_CODING	0	0	0	0	0	0	0	0	0	0	0	0	0	0	0	0	0	0	0	0	0	0	0	0	0	0	0	0	0	0	0	0	0	0	0	0	0	0	0	0
chrXII	138316	A	G	0.4043	0	YLL007C	YLL006W	YLL005C	SYNONYMOUS_CODING	0	0	0.0028	0	0	0	0	0	0	0	0	0	0	0	0	0	0	0	0	0.0037	0	0	0	0	0	0	0	0	0	0	0	0	0	0	0	0	0	0	0	0
chrXII	152039	C	T	0.4668	0	NONE	YLL001W	YLR001C	SYNONYMOUS_CODING	0	0.0035	0	0	0	0	0	0	0	0	0	0	0	0	0	0	0	0	0	0	0	0	0	0	0	0	0	0	0	0	0	0	0	0	0	0	0	0	0	0
chrXII	154460	C	A	0.4498	0	YLR001C	YLR003C	YLR002C	NON_SYNONYMOUS_CODING	0	0	0	0	0	0	0	0	0	0.0034	0	0	0	0	0	0	0	0	0	0	0	0	0	0	0	0	0	0	0	0	0.0052	0	0	0	0	0	0.0052	0	0.0032	0
chrXII	159839	A	G	0.4645	0	YLR005W	YLR006C	NONE	NONE	0	0	0	0	0	0	0	0	0	0	0	0	0	0	0	0	0	0	0	0	0	0	0	0	0	0	0	0	0	0	0	0	0	0	0	0	0	0	0	0
chrXII	160599	A	T	0.4611	0	YLR004C	YLR006C	YLR005W	NON_SYNONYMOUS_CODING	0	0	0	0	0	0	0	0	0	0	0	0	0	0	0	0	0	0	0	0	0	0	0	0	0	0	0	0	0	0	0	0	0	0	0	0	0	0	0	0
chrXII	163132	G	C	0.4388	0	YLR007W	YLR005W	YLR006C	NON_SYNONYMOUS_CODING	0	0	0	0	0	0	0	0	0.0065	0	0	0	0	0	0	0	0	0	0	0	0	0	0	0	0.0036	0	0	0	0	0	0	0	0	0	0	0	0	0	0	0
chrXII	164473	C	A	0.4877	0	YLR006C	YLR008C	YLR007W	NON_SYNONYMOUS_CODING	0	0	0	0	0	0	0	0	0	0	0	0	0	0	0	0	0	0	0	0	0	0	0	0	0	0	0	0	0	0	0	0	0	0	0.0036	0	0	0.0033	0	0
chrXII	168902	T	A	0.4861	0	YLR011W	YLR012C	NONE	NONE	0	0	0	0	0	0	0	0	0	0	0	0	0	0	0	0	0	0	0	0	0	0	0	0	0	0	0	0.4861	0	0	0	0.3053	0	0	0	0	0	0	0	0
chrXII	169202	T	A	10	1	tS(AGA)L	YLR012C	YLR011W	NON_SYNONYMOUS_CODING	0	0	0	0	0	0	0	0	0	0	0	0	0	0	0	0	0	0	0	0	0	0	0	0	0	0	0	0	0	0	0	0	0	0	0	0	0	0	0	0
chrXII	172428	G	A	10	1	YLR012C	YLR013W	YLR014C	STOP_GAINED	0	0	0	0	0	0	0	0	0	0	0	0	0	0	0	0	0	0	0	0	0	0	0	0	0	0	0	0	0	0	0	0	0	0	0	0	0	0	0	0
chrXII	172628	T	C	0.4952	0	YLR012C	YLR013W	YLR014C	NON_SYNONYMOUS_CODING	0	0	0	0	0	0	0	0	0	0	0	0	0	0	0	0	0.0078	0	0	0	0	0	0	0	0	0	0	0.4952	0	0	0	0	0	0.0024	0.004	0	0	0	0	0
chrXII	175932	G	A	0.4987	0	YLR014C	YLR016C	YLR015W	NON_SYNONYMOUS_CODING	0	0	0	0	0	0	0	0	0	0	0	0	0	0	0	0	0	0	0	0	0	0	0	0	0	0	0	0.4987	0	0	0	0.2809	0	0	0	0	0	0	0	0
chrXII	177824	A	T	0.5068	0	YLR016C	YLR018C	YLR017W	NON_SYNONYMOUS_CODING	0	0	0	0	0	0	0	0	0	0	0	0	0	0	0	0	0	0	0	0	0	0	0	0	0	0	0	0.5068	0	0	0	0.3189	0	0	0	0	0	0	0	0
chrXII	180402	A	G	0.4476	0	YLR018C	YLR020C	YLR019W	NON_SYNONYMOUS_CODING	0	0	0	0.003	0	0	0	0	0	0	0	0	0	0	0	0	0	0	0.008	0	0	0	0	0	0	0	0	0	0	0	0	0	0	0	0	0	0	0	0	0
chrXII	181323	C	T	0.5502	0	YLR018C	YLR020C	YLR019W	NON_SYNONYMOUS_CODING	0	0	0	0	0	0	0	0	0	0	0	0	0	0	0	0.0025	0	0	0	0	0	0	0	0	0	0	0	0	0	0	0	0	0	0	0	0	0	0	0	0
chrXII	183151	T	C	0.5079	0	YLR021W	YLR022C	YLR020C	NON_SYNONYMOUS_CODING	0	0	0	0	0	0	0	0	0	0	0	0	0	0	0	0	0	0	0	0	0	0	0	0	0	0	0	0	0	0	0	0	0	0	0	0	0	0	0	0
chrXII	188157	T	C	0.4604	0	YLR023C	YLR021W	YLR024C	NON_SYNONYMOUS_CODING	0	0	0	0	0	0	0	0	0	0	0	0	0	0	0	0	0	0	0	0	0	0	0	0	0	0.4604	0	0	0	0	0	0	0	0	0	0	0	0	0	0
chrXII	190000	C	T	0.4899	0	YLR023C	NONE	YLR024C	NON_SYNONYMOUS_CODING	0.0055	0	0	0	0	0	0	0	0	0	0	0	0	0	0	0.4899	0	0	0	0	0	0	0	0	0	0	0	0	0	0	0	0	0	0	0	0	0	0	0	0
chrXII	193863	A	G	0.4727	0	YLR024C	YLR026C	NONE	NONE	0	0	0.4727	0	0	0	0	0	0	0	0	0	0	0	0	0	0	0	0	0	0	0	0	0	0	0	0	0	0	0	0	0	0	0	0	0	0	0	0	0
chrXII	196318	A	T	0.4675	0	snR30	YLR027C	YLR026C	SYNONYMOUS_CODING	0	0	0.4675	0	0	0	0	0	0	0	0	0	0	0	0	0	0	0	0	0	0	0	0	0	0	0	0	0	0	0	0	0	0	0	0	0	0.0027	0	0	0
chrXII	198133	A	T	0.4886	0	YLR027C	YLR028C	NONE	NONE	0	0	0	0	0	0	0	0	0	0	0	0	0	0	0	0	0	0	0	0	0	0	0	0	0	0	0	0	0	0	0	0	0	0	0	0	0	0	0	0
chrXII	198736	C	G	0.5056	0	snR30	YLR028C	NONE	NONE	0	0	0	0	0	0	0	0	0	0	0	0	0	0	0	0	0	0	0	0	0	0	0	0	0	0	0	0	0	0	0	0	0	0	0	0	0	0	0	0
chrXII	198820	G	C	0.492	0	YLR027C	YLR028C	snR30	EXON	0	0	0	0	0	0	0	0	0.0051	0	0	0	0	0	0	0	0	0	0	0	0	0	0	0	0	0	0.0027	0	0	0	0	0	0	0	0	0	0	0	0	0
chrXII	198984	C	T	0.486	0	YLR027C	YLR028C	snR30	EXON	0	0	0	0	0	0	0	0	0	0	0	0	0	0.486	0	0	0	0	0	0	0	0	0	0	0	0	0	0	0	0	0	0.0032	0	0	0	0	0	0	0	0
chrXII	199708	A	T	0.494	0	YLR027C	snR30	YLR028C	NON_SYNONYMOUS_CODING	0	0	0	0	0	0	0	0	0	0	0	0	0	0	0	0	0	0	0	0	0	0	0	0	0	0	0	0	0	0	0	0	0	0	0	0	0	0	0	0
chrXII	202334	G	A	0.4811	0	YLR030W	snR30	YLR029C	SYNONYMOUS_CODING	0	0	0	0	0	0	0	0	0	0	0	0	0	0	0	0	0	0	0	0	0	0	0	0	0	0	0	0	0	0	0	0	0	0	0	0	0	0	0	0
chrXII	214973	G	A	0.444	0	tA(UGC)L	YLR035C-A	NONE	NONE	0	0	0	0	0	0	0	0	0	0	0	0	0	0	0	0	0	0	0	0	0	0	0	0	0	0	0	0	0	0	0	0	0	0	0	0	0	0	0	0
chrXII	215026	G	C	0.4968	0	tA(UGC)L	YLR035C-A	NONE	NONE	0	0	0	0	0	0	0	0	0	0	0	0	0	0	0	0.0026	0	0	0	0	0	0	0	0	0	0	0	0	0	0	0	0	0	0	0	0	0	0	0	0
chrXII	221434	A	G	10	1	YLR035C-A	YLR036C	NONE	NONE	0	0	0	0	0	0	0	0	10	0	0	0	0	0	0	0	0	0	0	0	0	0	0	0	0	0	0	0	0	0	0	0	0	0	0.0029	0	0	0	0	0
chrXII	227254	T	A	0.4951	0	YLR038C	YLR040C	YLR039C	NON_SYNONYMOUS_CODING	0	0	0	0	0	0	0.4951	0	0	0	0	0	0	0	0	0	0	0	0	0	0	0	0	0	0	0	0	0	0	0	0	0	0	0	0	0	0	0	0	0
chrXII	230100	G	T	0.5114	0	YLR040C	YLR041W	YLR042C	STOP_GAINED	0	0	0	0	0	0	0	0	0	0	0	0	0	0	0	0	0.0043	0	0	0	0	0	0	0	0	0	0	0	0	0	0	0	0	0	0	0	0	0	0	0
chrXII	230628	G	C	0.4458	0	YLR042C	YLR041W	NONE	NONE	0	0	0	0	0	0	0	0	0	0	0	0	0	0	0	0	0	0	0	0	0	0	0	0	0	0	0	0	0	0	0	0	0	0	0	0	0	0	0	0
chrXII	231690	T	C	0.4842	0	YLR042C	YLR043C	NONE	NONE	0	0	0	0	0	0	0	0	0	0	0	0	0	0	0	0	0	0	0	0	0	0	0	0	0	0	0	0	0	0	0	0	0	0	0	0	0	0	0	0
chrXII	233149	C	A	0.5154	0	YLR043C	YLR045C	YLR044C	NON_SYNONYMOUS_CODING	0	0	0	0	0	0	0	0.0044	0	0	0	0	0	0	0	0	0	0	0	0	0	0.0051	0.0027	0	0	0	0	0.5154	0	0	0	0.283	0	0	0	0	0	0	0	0
chrXII	234152	G	A	0.5438	0	YLR044C	YLR045C	NONE	NONE	0	0	0	0	0	0	0	0	0	0	0	0	0	0	0	0	0	0	0	0	0	0	0	0	0	0	0	0	0	0	0	0	0	0	0.5438	0	0	0	0	0
chrXII	234178	C	A	0.5073	0	YLR044C	YLR045C	NONE	NONE	0	0	0	0	0	0	0	0	0	0	0	0	0	0	0	0	0	0	0	0	0	0	0.0035	0	0	0	0	0	0.5073	0	0	0	0	0	0	0	0	0	0	0
chrXII	236252	T	G	0.4877	0	YLR044C	YLR046C	YLR045C	NON_SYNONYMOUS_CODING	0	0	0	0	0	0	0	0	0	0	0	0	0	0	0	0	0	0	0	0	0	0	0	0	0	0	0	0	0	0	0	0	0	0	0	0	0	0	0	0
chrXII	236791	G	C	0.5591	0	YLR044C	YLR046C	YLR045C	STOP_GAINED	0	0	0	0	0	0	0	0	0	0	0	0	0	0	0	0	0	0	0	0	0	0	0	0	0	0	0	0	0	0	0	0	0	0	0	0	0	0	0	0
chrXII	240297	T	C	0.9949	1	YLR046C	YLR049C	YLR047C	NON_SYNONYMOUS_CODING	0	0	0	0	0	0	0	0	0.9949	0	0	0	0	0	0	0	0	0	0	0	0	0	0	0	0	0	0	0	0	0	0	0	0	0	0	0	0	0	0	0
chrXII	242273	C	G	0.4731	0	YLR047C	YLR049C	YLR048W	NON_SYNONYMOUS_CODING	0	0	0	0	0.003	0	0	0	0	0	0	0	0	0	0.4731	0	0	0	0	0	0	0	0	0	0	0	0	0	0	0	0	0	0	0	0	0	0	0	0	0
chrXII	242607	A	G	0.5349	0	YLR047C	YLR049C	YLR048W	INTRON	0	0	0	0	0	0	0	0	0	0	0	0	0	0	0	0	0	0	0	0	0.004	0	0	0	0	0	0	0	0	0	0	0	0	0	0	0	0	0	0	0
chrXII	244269	T	C	0.5081	0	YLR047C	YLR048W	YLR049C	NON_SYNONYMOUS_CODING	0	0	0.5081	0	0	0	0	0	0	0	0	0	0.0025	0.0021	0	0	0	0	0	0	0	0	0	0	0	0	0	0	0	0	0	0	0	0	0	0	0	0	0	0
chrXII	248509	G	T	0.5635	0	YLR053C	YLR054C	NONE	NONE	0	0	0	0	0	0	0	0.0037	0	0	0	0	0	0	0	0	0	0	0	0	0	0.0068	0	0	0	0	0.0026	0	0	0	0	0	0	0	0	0	0	0	0	0
chrXII	248525	A	T	0.5339	0	YLR053C	YLR054C	NONE	NONE	0	0	0	0	0	0	0	0	0	0	0	0	0	0	0	0	0	0	0	0	0	0	0	0	0	0	0	0	0	0	0	0	0.0035	0	0	0	0	0.0032	0	0
chrXII	251064	T	A	0.5361	0	YLR054C	YLR055C	NONE	NONE	0	0	0	0	0.5361	0	0	0	0	0	0	0	0	0	0	0	0	0	0	0	0	0	0	0	0	0	0	0	0	0	0	0	0	0	0	0	0.0027	0	0	0
chrXII	252451	T	G	10	1	YLR056W	YLR052W	YLR055C	NON_SYNONYMOUS_CODING	0	0	0	0	0	0	0	0	0	0	0	0	0	0	0	0	0	0	0	0	0	0	0	0	0	0	0	0	0	0	0	0	0	0	0	0	0	0	0	0
chrXII	260311	T	A	0.4706	0	YLR060W	YLR057W	YLR059C	NON_SYNONYMOUS_CODING	0	0	0	0	0	0	0	0	0	0	0	0	0	0	0	0	0	0	0	0	0	0	0	0	0	0	0	0	0	0	0	0	0	0	0	0	0	0	0	0
chrXII	261087	C	A	0.5305	0	YLR059C	YLR062C	YLR060W	NON_SYNONYMOUS_CODING	0	0	0	0	0	0	0	0	0	0	0	0	0	0	0	0	0	0	0	0	0	0	0	0	0	0	0	0.0034	0	0	0	0	0	0	0	0	0	0	0	0
chrXII	262950	C	G	0.4768	0	YLR061W	YLR060W	NONE	NONE	0	0	0	0	0	0	0	0	0	0	0	0	0	0	0	0	0	0	0	0	0	0	0	0	0	0	0	0	0	0	0	0	0	0	0.4768	0	0	0	0	0
chrXII	263233	C	G	0.5233	0	YLR063W	YLR062C	YLR061W	INTRON	0.005	0	0	0	0	0	0.5233	0	0	0	0	0	0	0	0	0	0	0	0	0	0	0	0	0	0	0	0	0	0	0	0	0	0	0	0	0	0	0	0	0
chrXII	263246	T	C	0.5162	0	YLR063W	YLR062C	YLR061W	INTRON	0	0	0	0	0	0	0	0	0	0	0	0	0	0	0	0	0	0	0	0	0	0	0	0	0	0	0	0	0	0	0	0	0	0.5162	0	0	0	0	0	0
chrXII	266037	T	C	0.4864	0	YLR066W	YLR065C	YLR064W	NON_SYNONYMOUS_CODING	0	0	0	0	0	0	0	0	0	0	0	0	0	0	0	0	0	0	0	0	0	0	0	0	0	0	0	0	0	0	0	0	0	0	0	0	0	0	0	0
chrXII	268228	C	T	0.4764	0	YLR065C	YLR066W	YLR067C	SYNONYMOUS_CODING	0	0	0	0	0	0	0	0	0	0	0	0	0	0	0	0	0	0	0	0	0	0	0	0	0	0	0	0	0	0	0	0	0	0	0	0	0	0	0	0
chrXII	272141	A	T	0.4954	0	YLR067C	YLR068W	YLR069C	SYNONYMOUS_CODING	0	0	0	0	0	0	0	0	0	0	0	0	0	0	0	0	0	0	0	0	0	0	0	0	0	0	0	0	0	0	0	0	0	0	0	0	0	0	0	0
chrXII	273910	C	A	0.4929	0	YLR067C	YLR070C	YLR069C	NON_SYNONYMOUS_CODING	0	0	0	0	0	0	0	0	0	0	0	0	0	0.0027	0	0	0	0	0	0	0	0	0	0	0	0	0	0	0	0	0	0	0	0	0	0	0	0	0	0
chrXII	275142	C	G	0.4701	0	YLR069C	YLR071C	YLR070C	NON_SYNONYMOUS_CODING	0	0	0	0	0	0	0	0	0	0	0.003	0	0	0	0	0.4701	0	0	0	0	0	0	0	0	0	0	0	0	0	0	0	0	0	0	0	0	0	0	0	0
chrXII	277502	T	C	0.5014	0	YLR072W	YLR073C	YLR071C	NON_SYNONYMOUS_CODING	0	0	0	0	0	0	0	0	0	0	0	0	0	0	0	0	0	0	0	0	0	0	0	0	0.0031	0	0	0	0	0	0	0	0	0	0	0	0	0	0	0
chrXII	280731	A	T	0.4267	0	YLR071C	YLR073C	YLR072W	NON_SYNONYMOUS_CODING	0	0	0	0	0	0	0	0	0	0	0	0	0	0	0	0	0	0	0	0	0	0	0	0	0	0	0	0	0	0	0	0	0.4267	0	0	0	0	0	0	0
chrXII	281101	G	A	0.4955	0	YLR075W	YLR072W	YLR073C	SYNONYMOUS_CODING	0	0	0	0	0	0	0	0	0	0	0	0	0	0	0	0	0	0	0	0	0	0	0	0	0	0.4955	0	0	0	0	0	0	0	0	0	0	0	0	0	0
chrXII	281707	A	C	0.9939	1	YLR073C	YLR074C	NONE	NONE	0	0	0	0	0	0	0	0	0	0	0	0	0	0	0	0	0	0	0	0	0	0	0	0	0	0	0	0	0	0.0047	0	0	0	0	0	0	0.0032	0	0	0
chrXII	283092	C	T	0.5056	0	YLR074C	YLR076C	YLR075W	SYNONYMOUS_CODING	0	0	0	0	0	0	0	0	0	0	0	0	0	0	0	0	0	0	0	0	0	0	0	0	0.5056	0	0	0	0	0	0	0	0	0	0	0	0	0	0	0
chrXII	283582	G	A	0.4623	0	YLR077W	YLR078C	YLR075W	NON_SYNONYMOUS_CODING	0	0	0	0	0	0	0	0	0	0	0	0	0	0	0	0	0	0	0	0	0	0	0	0	0	0	0	0	0	0	0	0	0	0	0	0	0	0.4623	0	0
chrXII	286053	T	A	0.5157	0	YLR079W	YLR077W	YLR078C	NON_SYNONYMOUS_CODING	0	0	0	0	0	0	0	0	0	0	0	0	0	0	0	0	0	0	0	0	0	0	0	0	0	0	0	0	0	0	0	0	0	0	0	0	0	0	0	0
chrXII	288490	T	C	0.4487	0	YLR081W	YLR079W	YLR080W	NON_SYNONYMOUS_CODING	0	0	0	0	0	0	0	0	0	0	0	0	0	0	0	0	0	0	0	0	0	0	0	0	0	0	0	0	0	0	0	0	0	0	0	0	0	0	0	0
chrXII	288551	C	T	0.5427	0	YLR081W	YLR079W	YLR080W	NON_SYNONYMOUS_CODING	0	0	0	0	0	0.0018	0	0	0	0	0	0	0	0	0	0.0017	0	0	0	0	0	0	0	0	0	0	0	0	0	0	0	0	0	0	0	0	0	0	0	0
chrXII	295968	A	G	0.5471	0	YLR082C	YLR084C	YLR083C	NON_SYNONYMOUS_CODING	0	0	0	0	0	0.0023	0	0	0	0	0	0	0	0	0	0	0	0	0	0	0	0	0	0	0	0	0	0	0	0	0	0	0	0	0	0	0	0	0	0
chrXII	297941	T	C	0.5072	0	YLR083C	YLR085C	YLR084C	NON_SYNONYMOUS_CODING	0	0	0	0	0	0	0	0	0	0	0	0	0	0	0	0	0	0	0	0	0	0	0	0	0.0036	0	0	0	0	0	0	0	0	0	0	0	0	0	0	0
chrXII	305141	C	G	0.4905	0	YLR085C	YLR087C	YLR086W	NON_SYNONYMOUS_CODING	0	0	0	0	0	0	0	0	0	0	0	0	0	0	0	0	0	0	0	0	0	0	0	0	0	0	0	0	0	0	0	0	0	0	0	0	0	0	0	0
chrXII	306356	A	G	0.4887	0	YLR085C	YLR087C	YLR086W	SYNONYMOUS_CODING	0	0.0036	0	0	0	0	0	0	0	0	0	0	0	0	0	0.4887	0	0	0	0	0	0	0	0	0	0	0	0	0	0	0	0	0	0	0.0031	0	0	0	0	0
chrXII	307439	A	G	0.4167	0	NONE	YLR086W	YLR087C	NON_SYNONYMOUS_CODING	0	0	0	0	0	0	0	0	0	0	0	0	0	0	0	0.4167	0	0	0	0	0	0	0	0	0	0	0	0.0028	0	0	0	0	0	0	0	0	0	0	0	0
chrXII	310583	T	C	0.4637	0	NONE	YLR086W	YLR087C	NON_SYNONYMOUS_CODING	0	0	0	0	0	0	0	0	0	0	0	0	0	0	0	0	0	0	0	0	0	0	0	0	0	0	0	0	0	0	0	0	0	0	0	0	0	0	0	0
chrXII	313881	C	T	0.5041	0	YLR088W	YLR089C	YLR087C	NON_SYNONYMOUS_CODING	0	0	0	0	0	0	0	0	0	0	0	0	0	0	0	0	0	0	0	0	0	0	0	0	0	0	0	0	0	0	0	0	0	0	0	0	0	0	0	0
chrXII	315635	C	A	0.991	1	YLR088W	YLR089C	YLR087C	NON_SYNONYMOUS_CODING	0	0	0	0	0	0	0	0.0029	0.991	0	0	0	0	0	0	0	0	0	0	0	0	0	0	0	0	0	0	0	0.0031	0	0	0	0	0	0	0	0	0	0	0
chrXII	316995	C	A	0.5144	0	YLR087C	YLR089C	YLR088W	NON_SYNONYMOUS_CODING	0	0	0.0038	0	0	0	0	0	0	0	0	0	0	0	0	0	0	0	0	0	0	0	0	0	0	0	0	0	0	0	0	0	0	0	0	0	0	0	0	0
chrXII	317043	T	C	0.44	0	YLR087C	YLR089C	YLR088W	SYNONYMOUS_CODING	0.0071	0	0	0.44	0	0	0	0	0	0	0	0	0	0	0	0	0	0	0	0	0	0	0	0	0.0045	0	0	0	0	0	0	0	0	0	0	0	0	0	0	0
chrXII	318898	T	A	0.5154	0	YLR090W	YLR088W	YLR089C	NON_SYNONYMOUS_CODING	0	0	0	0	0	0	0	0	0	0	0	0	0	0	0	0	0	0	0	0	0	0	0	0	0	0	0	0	0	0	0	0	0	0	0	0	0	0	0	0
chrXII	319044	G	T	0.4717	0	YLR090W	YLR088W	YLR089C	NON_SYNONYMOUS_CODING	0	0	0	0	0	0	0	0.0026	0	0	0	0	0	0	0	0	0.0029	0.4717	0	0	0	0	0	0	0	0	0	0	0	0	0.0051	0	0	0	0	0	0	0	0	0
chrXII	321492	A	G	0.9804	1	YLR091W	YLR088W	YLR090W	NON_SYNONYMOUS_CODING	0	0	0	0	0	0.0034	0	0	0	0	0	0	0	0	0	0	0	0	0	0	0	0.9804	0	0	0	0	0	0	0	0.0048	0	0	0	0	0	0	0	0	0	0
chrXII	323256	G	T	0.4625	0	YLR092W	YLR091W	NONE	NONE	0	0.0041	0	0	0	0	0	0	0	0	0	0	0	0	0	0	0	0	0	0.4625	0	0	0	0	0	0	0	0.0032	0	0	0	0	0	0	0	0	0	0	0	0
chrXII	324441	A	G	0.4868	0	YLR089C	YLR091W	YLR092W	SYNONYMOUS_CODING	0	0	0	0	0	0	0	0	0	0	0	0	0	0	0.0027	0	0	0	0	0	0	0	0	0	0	0	0	0	0	0	0	0	0	0	0	0	0	0	0	0
chrXII	325999	G	T	0.464	0	NONE	YLR093C	YLR092W	NON_SYNONYMOUS_CODING	0	0	0.0025	0.0026	0.464	0	0.0055	0	0	0	0	0	0	0	0	0	0	0	0	0	0	0	0	0	0	0	0	0	0	0	0	0	0	0	0	0	0	0	0	0
chrXII	342635	C	T	0.4813	0	YLR099C	YLR102C	YLR101C	NON_SYNONYMOUS_CODING	0	0	0	0	0	0	0	0	0	0	0.0065	0	0	0	0	0	0	0	0	0	0	0	0	0	0	0	0	0	0	0	0	0	0	0	0	0	0	0	0	0
chrXII	348285	C	T	0.5394	0	YLR105C	snR79	NONE	NONE	0	0	0	0	0	0	0	0	0	0	0	0	0	0	0	0	0	0	0	0	0	0	0	0	0	0.5394	0	0	0	0	0	0	0	0	0	0	0	0	0	0
chrXII	348669	G	C	0.507	0	snR79	YLR106C	NONE	NONE	0	0	0	0	0	0	0	0	0	0	0	0	0	0	0.0028	0	0	0	0	0	0	0	0	0	0	0	0.507	0	0	0	0	0	0	0	0	0	0	0	0	0
chrXII	350210	T	C	0.4749	0	snR79	YLR104W	YLR106C	SYNONYMOUS_CODING	0	0	0	0	0	0	0	0	0	0	0	0	0	0	0	0.0018	0	0	0	0	0	0	0.4749	0	0	0	0	0	0	0	0	0	0	0	0	0	0	0	0	0
chrXII	350537	A	C	0.4636	0	snR79	YLR104W	YLR106C	SYNONYMOUS_CODING	0	0	0	0	0	0	0	0	0	0	0.4636	0	0	0	0	0	0	0	0	0	0	0.0054	0	0	0	0	0	0	0	0	0	0	0	0	0	0.0023	0	0	0	0
chrXII	351380	T	A	0.4354	0	snR79	YLR104W	YLR106C	NON_SYNONYMOUS_CODING	0	0	0	0	0	0	0.4354	0	0	0	0	0	0	0	0	0	0	0	0	0	0	0	0	0	0	0	0	0	0	0	0	0	0.0037	0	0	0	0	0	0	0
chrXII	352043	C	A	0.4914	0	snR79	NONE	YLR106C	SYNONYMOUS_CODING	0	0	0	0	0	0	0	0	0	0	0	0	0	0	0	0	0	0	0	0	0	0	0.4914	0	0	0	0	0.0046	0	0	0	0	0	0	0	0	0	0	0	0
chrXII	355591	A	T	0.4409	0	NONE	NONE	YLR106C	NON_SYNONYMOUS_CODING	0	0	0	0	0	0	0	0	0	0	0	0	0	0	0	0	0	0	0	0	0	0	0	0	0	0	0	0	0	0	0	0	0	0	0	0	0	0	0	0
chrXII	356916	T	A	0.4554	0	NONE	NONE	YLR106C	NON_SYNONYMOUS_CODING	0	0	0	0	0	0	0	0	0	0	0	0	0	0	0	0	0	0	0	0	0	0	0	0	0	0	0	0	0	0	0	0	0	0	0	0	0	0	0	0
chrXII	358049	T	C	0.5169	0	NONE	NONE	YLR106C	SYNONYMOUS_CODING	0	0	0	0	0	0	0	0	0	0	0	0	0	0	0	0	0	0	0	0	0	0	0	0	0.5169	0	0	0	0	0	0	0	0	0	0	0	0	0	0	0
chrXII	361997	G	C	0.4561	0	YLR107W	YLR108C	YLR106C	SYNONYMOUS_CODING	0	0	0	0	0	0	0.4561	0	0	0	0	0	0	0	0	0	0	0	0	0	0	0	0	0	0	0	0	0	0	0	0	0	0	0	0	0	0	0	0	0
chrXII	362857	C	T	0.4825	0	YLR107W	YLR108C	YLR106C	NON_SYNONYMOUS_CODING	0	0	0	0	0	0	0	0	0	0	0	0	0	0	0	0	0	0	0	0	0	0	0	0	0	0	0	0	0	0	0	0	0	0	0	0	0	0	0	0
chrXII	363132	T	A	0.4498	0	YLR107W	YLR108C	YLR106C	NON_SYNONYMOUS_CODING	0	0	0	0	0	0	0	0	0	0	0	0	0	0	0	0	0	0	0.0033	0	0	0	0	0	0	0	0	0	0	0	0	0	0	0	0	0	0	0	0	0
chrXII	363724	T	A	0.4665	0	YLR107W	YLR108C	YLR106C	NON_SYNONYMOUS_CODING	0	0	0	0	0	0	0	0	0	0	0	0	0	0	0	0	0	0.0038	0	0	0	0	0	0	0	0	0	0.4665	0	0	0	0	0.0027	0	0	0	0	0	0	0
chrXII	367190	C	A	0.4684	0	YLR109W	snR6	YLR108C	NON_SYNONYMOUS_CODING	0	0	0	0	0.4684	0	0	0	0	0	0	0	0	0	0	0	0	0	0	0	0	0	0	0	0	0	0	0	0	0	0	0	0	0	0	0.002	0	0	0	0
chrXII	367776	T	C	0.5	0	YLR109W	snR6	YLR108C	NON_SYNONYMOUS_CODING	0	0	0	0	0	0	0	0	0	0	0	0	0	0	0	0	0	0	0	0	0	0	0	0	0	0	0	0	0	0.5	0	0	0	0	0	0	0	0	0	0
chrXII	368744	C	T	0.4873	0	YLR109W	YLR110C	NONE	NONE	0	0	0	0	0	0	0	0	0	0	0	0	0.4873	0.0146	0	0	0	0	0	0	0	0	0	0	0	0	0	0	0	0	0	0	0	0	0	0	0	0	0	0
chrXII	369018	G	T	0.4838	0	YLR108C	YLR110C	YLR109W	NON_SYNONYMOUS_CODING	0	0	0	0	0	0	0	0	0	0.0033	0	0	0	0	0	0	0	0	0	0	0	0	0	0	0	0	0	0	0	0	0	0	0	0	0	0	0	0	0	0
chrXII	370639	C	A	0.48	0	YLR112W	YLR109W	YLR111W	NON_SYNONYMOUS_CODING	0	0	0	0	0	0	0	0	0	0	0	0	0	0	0	0	0	0	0	0	0	0	0	0	0	0	0	0	0	0	0	0	0	0	0	0	0	0	0	0
chrXII	372907	C	A	0.4764	0	tR(ACG)L	YLR112W	YLR113W	STOP_GAINED	0	0.0034	0	0	0.0029	0	0	0	0	0	0	0	0	0	0	0.0023	0	0	0	0	0	0	0	0	0	0	0	0	0	0	0	0	0	0	0	0	0	0	0	0
chrXII	374405	C	T	0.5048	0	YLR115W	YLR114C	tR(ACG)L	EXON	0	0	0	0	0	0	0	0	0	0	0	0.0038	0	0	0	0	0	0	0	0	0	0	0	0	0	0	0	0	0	0	0	0	0	0.0036	0	0	0	0	0	0
chrXII	374501	C	A	0.4607	0	YLR115W	tR(ACG)L	NONE	NONE	0	0	0	0	0	0	0	0	0	0	0	0	0	0	0	0	0	0	0	0	0	0	0	0	0	0	0	0	0	0	0	0	0	0	0	0	0	0	0	0
chrXII	387839	C	T	0.5473	0	YLR120W-A	YLR121C	YLR120C	NON_SYNONYMOUS_CODING	0	0	0	0	0	0	0	0	0	0	0	0	0	0	0	0	0	0	0	0	0	0	0	0	0	0	0	0	0	0	0	0	0.0048	0	0	0	0	0	0	0
chrXII	394803	G	T	0.5282	0	YLR123C	YLR125W	YLR126C	NON_SYNONYMOUS_CODING	0	0	0	0	0	0	0	0	0	0	0	0	0.0027	0	0	0	0	0	0	0	0	0	0.0039	0	0	0	0	0	0	0	0	0	0	0	0	0	0	0	0	0
chrXII	400439	T	C	0.4727	0	YLR127C	YLR128W	YLR129W	NON_SYNONYMOUS_CODING	0	0	0.0026	0.4727	0	0	0	0	0	0	0	0	0	0.0022	0	0	0	0	0	0	0	0	0	0	0	0	0	0	0	0	0	0	0	0	0	0	0	0	0	0
chrXII	401210	C	A	0.4606	0	YLR127C	YLR130C	YLR129W	NON_SYNONYMOUS_CODING	0	0	0	0	0	0	0.0029	0	0	0.0025	0	0	0	0.0024	0	0	0	0	0	0	0	0	0	0	0	0	0	0	0	0	0	0	0	0	0	0.4606	0	0	0	0
chrXII	402714	C	A	0.4567	0	YLR127C	YLR130C	NONE	NONE	0	0	0	0	0	0	0	0	0	0	0	0	0	0.0033	0	0	0	0	0	0	0	0	0	0	0	0	0.0032	0	0	0	0	0	0	0	0	0	0	0	0	0
chrXII	404458	T	C	0.5	0	YLR130C	YLR131C	NONE	NONE	0	0	0	0	0	0	0	0	0	0	0	0	0	0	0	0	0	0	0	0	0	0	0	0	0	0	0	0	0	0	0	0	0	0	0	0	0	0	0	0
chrXII	412000	C	G	0.5012	0	YLR135W	YLR133W	YLR134W	NON_SYNONYMOUS_CODING	0	0	0	0	0	0.5012	0	0	0	0	0	0	0	0	0	0	0	0	0	0	0	0	0	0	0	0	0	0	0	0	0	0	0	0	0	0	0	0	0	0
chrXII	419115	A	T	0.5312	0	YLR136C	YLR137W	YLR138W	SYNONYMOUS_CODING	0	0	0	0	0	0	0	0	0	0	0	0	0	0	0	0	0	0	0	0	0	0	0	0	0	0	0	0	0	0	0	0	0	0	0	0	0	0	0	0
chrXII	419662	T	C	0.4497	0	YLR136C	YLR137W	YLR138W	NON_SYNONYMOUS_CODING	0	0	0	0	0	0	0	0	0	0	0	0	0	0.0022	0	0	0	0	0.4497	0	0	0	0	0	0	0	0	0	0	0	0	0	0	0	0	0	0	0	0	0
chrXII	420449	A	G	0.4727	0	YLR140W	YLR139C	YLR138W	NON_SYNONYMOUS_CODING	0	0	0	0	0	0	0	0	0	0	0	0	0	0	0	0	0	0	0	0	0	0	0	0	0	0	0	0	0	0	0	0	0.4727	0	0	0	0	0	0	0
chrXII	421889	T	C	0.5308	0	YLR140W	YLR138W	YLR139C	NON_SYNONYMOUS_CODING	0	0	0	0	0	0	0	0	0	0	0	0	0	0	0	0	0	0	0	0	0	0	0	0	0	0	0	0	0	0	0	0	0	0	0	0	0	0	0	0
chrXII	424503	C	T	0.4819	0	YLR142W	YLR140W	YLR141W	NON_SYNONYMOUS_CODING	0	0	0	0	0	0	0	0	0	0	0	0	0	0	0	0	0	0	0	0	0	0	0	0	0	0	0	0	0	0	0	0	0	0	0	0	0	0	0	0
chrXII	431506	T	C	0.4858	0	YLR145W	YLR146C	YLR144C	NON_SYNONYMOUS_CODING	0	0	0	0	0	0	0	0	0	0	0	0	0	0	0	0	0.4858	0	0	0	0	0	0	0	0	0	0	0	0	0	0	0	0	0	0	0	0	0	0	0
chrXII	435134	G	T	0.4973	0	YLR147C	YLR146W-A	YLR148W	NON_SYNONYMOUS_CODING	0	0	0	0.4973	0	0	0	0	0	0	0	0	0	0	0	0	0	0	0	0	0	0	0	0	0	0	0	0.0033	0	0	0	0	0	0	0	0	0	0	0	0
chrXII	435413	C	T	0.5315	0	YLR147C	YLR146W-A	YLR148W	NON_SYNONYMOUS_CODING	0	0	0	0	0	0	0	0	0	0	0	0	0	0	0	0	0	0	0	0	0	0	0	0	0	0	0	0	0	0	0	0	0.003	0	0	0	0	0	0	0.5315
chrXII	438020	G	C	0.4796	0	YLR150W	YLR148W	YLR149C	NON_SYNONYMOUS_CODING	0	0	0	0	0	0	0	0	0	0	0	0	0	0	0	0	0	0	0	0	0	0	0	0	0	0	0	0	0	0	0	0	0	0	0	0	0	0	0	0
chrXII	438630	A	G	0.4444	0	YLR150W	YLR148W	YLR149C	NON_SYNONYMOUS_CODING	0	0	0	0	0	0	0	0	0	0	0	0	0	0	0	0	0	0	0	0.004	0	0	0	0	0	0	0	0	0	0	0	0	0	0	0.0041	0	0.0031	0	0	0
chrXII	441217	C	T	0.5026	0	YLR149C-A	YLR151C	YLR150W	SYNONYMOUS_CODING	0	0	0	0.5026	0	0	0	0	0	0	0	0	0.0028	0	0	0	0	0	0	0	0	0	0	0	0	0	0	0	0	0	0	0	0	0	0	0	0	0	0	0
chrXII	441249	A	G	0.5244	0	YLR149C-A	YLR151C	YLR150W	NON_SYNONYMOUS_CODING	0	0	0	0	0	0	0	0	0	0	0	0	0	0	0	0	0.5244	0	0	0	0	0	0.0033	0	0	0	0	0	0	0	0	0	0	0	0	0	0.003	0	0	0
chrXII	441556	G	T	0.4014	0	YLR149C-A	YLR151C	NONE	NONE	0	0	0	0	0	0	0.0036	0	0	0	0	0	0	0	0	0	0	0	0	0	0	0	0	0	0	0	0	0	0	0	0	0.0041	0	0	0	0	0	0	0	0
chrXII	443427	C	T	10	1	YLR151C	YLR153C	YLR152C	SYNONYMOUS_CODING	0	0	0	0	0	0	0.0088	0	0	0	0	0	0	0	0	0	0	0	0	0	0	10	0	0	0	0	0	0	0	0	0	0	0	0	0	0	0	0	0	0
chrXII	446177	G	T	0.4578	0	YLR152C	YLR154C	YLR153C	NON_SYNONYMOUS_CODING	0	0	0.0023	0	0	0	0	0	0	0	0	0	0	0	0	0	0	0	0	0	0	0	0	0	0	0	0	0	0	0	0	0	0.009	0	0	0	0	0	0	0.4578
chrXII	447098	G	T	0.5113	0	YLR152C	YLR154C	YLR153C	NON_SYNONYMOUS_CODING	0	0	0	0	0	0	0	0	0	0	0	0	0	0	0	0	0	0	0	0	0	0	0.0034	0	0	0	0	0	0	0	0	0	0.0069	0	0	0	0	0.5113	0	0
chrXII	448255	C	T	0.5154	0	YLR153C	tQ(UUG)L	YLR154C	NON_SYNONYMOUS_CODING	0	0	0	0	0	0	0	0	0	0	0	0	0	0	0	0	0	0	0	0	0	0	0.0032	0	0	0.5154	0	0	0	0	0	0	0	0	0	0	0	0	0	0
chrXII	448753	T	C	0.4949	0	tQ(UUG)L	RDN25-1	NONE	NONE	0	0	0	0	0	0	0	0	0	0.0035	0	0	0	0	0	0	0	0	0.0036	0	0	0	0	0	0	0	0	0	0	0	0	0	0	0	0	0	0	0	0	0
chrXII	449662	C	A	0.5079	0	tQ(UUG)L	RDN25-1	NONE	NONE	0	0	0	0	0	0	0	0	0	0	0	0	0	0	0	0	0	0	0	0	0	0	0	0	0	0	0	0	0	0	0	0	0	0	0.0047	0	0	0	0	0
chrXII	468860	C	G	0.4157	0	RDN18-2	YLR155C	YLR154C-H	NON_SYNONYMOUS_CODING	0	0	0	0	0.4157	0	0	0	0	0	0	0	0	0	0	0	0	0	0	0	0	0	0	0	0	0	0	0	0	0	0	0	0	0	0	0	0	0	0	0
chrXII	490798	A	G	0.5439	0	YLR163W-A	YLR162W-A	NONE	NONE	0	0	0	0	0	0	0	0	0	0	0	0	0	0	0	0	0	0	0	0	0	0	0	0	0	0	0	0	0	0	0	0	0	0	0	0	0	0	0	0.004
chrXII	495430	G	C	0.4638	0	YLR165C	YLR166C	NONE	NONE	0	0	0	0	0	0.0021	0	0	0	0	0	0	0	0	0	0	0	0	0	0	0	0	0	0	0	0	0	0	0	0	0	0.0027	0	0	0	0	0	0	0	0
chrXII	498847	C	T	0.4925	0	YLR167W	YLR168C	NONE	NONE	0	0.4925	0	0	0	0	0	0	0	0	0	0	0	0	0	0	0	0	0	0	0	0	0	0	0	0	0	0	0	0	0	0	0	0	0	0	0	0	0	0
chrXII	500644	C	A	0.4798	0	YLR171W	YLR172C	YLR169W	NON_SYNONYMOUS_CODING	0	0	0.0028	0	0	0	0	0	0	0	0	0	0.4798	0.0214	0	0	0	0	0	0	0	0	0.0035	0	0	0	0	0	0.0032	0	0	0	0	0	0	0	0	0	0	0
chrXII	500738	T	A	0.4676	0	YLR168C	YLR169W	YLR170C	NON_SYNONYMOUS_CODING	0	0	0	0	0	0	0	0	0	0	0	0	0	0.4676	0.003	0	0	0	0	0	0	0	0	0	0	0	0	0	0	0	0	0	0	0	0	0	0	0	0	0
chrXII	501171	A	T	0.457	0	YLR170C	YLR171W	NONE	NONE	0	0	0	0	0	0.457	0	0	0	0	0	0	0	0	0	0	0	0	0	0	0	0	0	0	0	0	0	0	0	0.0053	0	0	0	0	0	0	0	0	0	0
chrXII	505700	G	T	0.4814	0	YLR175W	YLR173W	YLR174W	NON_SYNONYMOUS_CODING	0	0	0	0	0	0	0	0	0	0	0	0	0	0	0	0	0	0	0	0	0	0	0	0	0	0	0.0023	0	0	0	0	0	0	0	0	0	0	0	0	0
chrXII	505723	G	T	0.4772	0	YLR175W	YLR173W	YLR174W	NON_SYNONYMOUS_CODING	0	0	0	0	0	0	0	0	0	0.0037	0	0	0	0	0	0	0	0	0	0	0	0	0	0	0.004	0	0	0	0	0	0	0	0	0	0.0033	0	0	0	0	0
chrXII	507694	A	G	0.9916	1	YLR177W	YLR176C	NONE	NONE	0	0	0	0	0	0	0	0	0	0	0	0	0	0	0	0	0	0.9916	0	0	0	0	0	0	0	0	0	0	0	0	0.0044	0	0	0	0	0	0	0	0	0
chrXII	508492	A	G	0.4964	0	YLR177W	YLR175W	YLR176C	SYNONYMOUS_CODING	0	0	0	0	0	0	0	0	0	0	0	0.4964	0.0027	0	0	0	0	0	0	0	0	0	0	0	0	0	0	0	0	0	0	0	0	0	0	0	0	0	0	0
chrXII	523927	G	C	0.4485	0	YLR187W	YLR185W	YLR186W	SYNONYMOUS_CODING	0	0	0	0	0	0	0	0	0	0	0	0	0	0	0	0	0	0	0	0	0	0	0.4485	0	0	0	0	0	0	0	0	0	0	0	0	0	0	0	0	0
chrXII	524964	A	T	0.4633	0	YLR183C	YLR186W	YLR187W	NON_SYNONYMOUS_CODING	0	0	0	0	0	0	0	0	0	0	0	0	0	0	0	0	0	0	0	0	0	0	0	0	0	0	0	0	0	0	0	0	0	0	0	0	0	0	0	0
chrXII	529526	T	A	0.5333	0	NONE	YLR189C	YLR188W	NON_SYNONYMOUS_CODING	0	0	0	0	0	0	0	0	0	0	0	0	0	0	0.5333	0	0	0	0	0	0	0	0	0	0	0	0	0	0	0	0	0	0	0	0	0	0	0	0	0
chrXII	529541	C	G	0.5303	0	NONE	YLR189C	YLR188W	NON_SYNONYMOUS_CODING	0	0	0	0	0	0	0	0	0	0	0	0	0	0	0.5303	0	0	0	0	0	0	0	0	0	0	0	0	0	0	0	0	0	0	0	0	0	0	0	0	0
chrXII	534087	A	G	10	1	YLR190W	YLR188W	YLR189C	SYNONYMOUS_CODING	0	0	0	0	0	0	0	0	10	0	0	0	0	0	0	0	0	0	0	0	0	0	0	0	0	0	0	0	0	0	0	0	0	0	0	0	0	0	0	0
chrXII	539004	T	C	0.5149	0	YLR189C	YLR191W	YLR192C	SYNONYMOUS_CODING	0	0	0	0	0	0	0	0	0	0	0	0	0	0	0	0	0	0	0	0	0	0	0	0	0	0	0	0	0	0	0	0	0	0	0	0	0	0	0	0
chrXII	543314	A	T	0.4661	0	YLR195C	YLR198C	NONE	NONE	0	0	0	0	0	0	0	0	0	0	0	0	0	0	0	0	0	0	0	0	0	0	0	0	0	0	0	0	0	0	0	0	0	0	0	0	0	0	0	0
chrXII	543870	G	T	0.4531	0	YLR196W	YLR198C	NONE	NONE	0	0	0	0	0	0	0	0	0	0	0	0	0.0032	0	0	0	0	0	0	0	0	0	0	0	0	0	0	0	0	0	0	0	0	0	0	0	0	0	0	0.0088
chrXII	546041	G	T	0.4862	0	YLR197W	YLR196W	NONE	NONE	0	0	0	0	0	0	0	0	0	0	0	0	0	0	0	0	0	0	0	0	0	0	0	0	0	0	0	0.4862	0	0	0	0	0	0	0	0	0	0	0	0
chrXII	546520	G	T	10	2	YLR200W	YLR198C	YLR197W	NON_SYNONYMOUS_CODING	0	0	0	0	0	0	0	0.0052	0	0	0.0028	0	0	0	0	0	0	0	0	0	0	0	0	0	0	0	0	0	0	0	0	0	0	0	0	0	0	0	0	0
chrXII	546563	T	C	0.5266	0	YLR200W	YLR198C	YLR197W	SYNONYMOUS_CODING	0	0	0	0	0	0.5266	0	0	0	0	0	0	0	0	0	0.0023	0	0	0	0	0	0	0	0.0075	0	0	0	0	0	0.0041	0	0	0	0	0	0	0	0	0	0
chrXII	546709	C	T	0.5412	0	YLR200W	YLR198C	YLR197W	NON_SYNONYMOUS_CODING	0	0	0	0	0	0	0	0	0	0	0	0	0	0	0	0	0	0	0	0	0	0	0	0	0	0	0	0	0	0	0	0	0	0	0	0	0	0	0	0
chrXII	547093	C	G	0.4948	0	YLR200W	YLR198C	YLR197W	NON_SYNONYMOUS_CODING	0	0.0037	0	0	0	0	0	0	0	0	0	0	0	0	0	0	0	0	0	0	0	0	0	0	0	0	0.0028	0	0	0	0	0	0	0	0	0	0	0	0	0
chrXII	551667	G	A	0.5044	0	YLR204W	YLR205C	YLR203C	NON_SYNONYMOUS_CODING	0	0	0	0	0	0	0	0	0	0	0	0	0	0	0	0	0	0	0	0	0	0	0	0	0	0	0	0	0	0	0	0	0	0	0	0	0	0	0	0
chrXII	554690	C	T	0.5265	0	YLR205C	YLR204W	YLR206W	SYNONYMOUS_CODING	0	0	0	0	0.5265	0	0	0	0	0.0046	0	0	0	0	0	0	0	0	0	0	0	0	0	0	0	0	0	0	0	0	0	0	0	0	0	0	0	0	0	0
chrXII	556479	A	T	0.4701	0	YLR207W	YLR206W	NONE	NONE	0	0	0	0	0	0	0	0	0	0	0	0	0	0	0	0	0	0	0	0	0	0	0	0	0	0	0	0	0	0	0	0	0	0	0	0	0	0.005	0	0.4701
chrXII	561127	C	A	0.4404	0	YLR210W	YLR208W	YLR209C	NON_SYNONYMOUS_CODING	0	0	0	0	0	0	0	0	0	0	0	0	0	0	0	0	0	0	0.4404	0	0	0	0	0	0	0	0.0025	0	0	0	0	0	0	0	0	0	0	0.0028	0	0
chrXII	561570	C	G	0.4731	0	YLR210W	YLR208W	YLR209C	SYNONYMOUS_CODING	0	0	0	0	0	0.4731	0	0	0	0	0	0	0.0036	0	0	0	0	0	0	0	0	0	0	0	0	0	0	0	0	0	0	0	0	0	0	0	0	0	0	0
chrXII	566968	A	G	0.6277	0	YLR212C	YLR210W	YLR213C	SYNONYMOUS_CODING	0	0	0	0	0	0	0	0	0	0.6277	0	0	0	0	0	0	0	0	0	0	0	0	0	0	0	0	0	0	0	0	0	0	0	0	0	0	0	0	0	0
chrXII	568596	T	A	0.4492	0	YLR213C	YLR215C	YLR214W	NON_SYNONYMOUS_CODING	0	0	0	0	0	0	0	0	0	0	0	0	0	0	0	0	0	0	0	0	0	0	0	0	0	0	0	0	0	0	0	0	0	0	0	0	0	0	0	0
chrXII	569062	T	C	0.4362	0	YLR213C	YLR215C	YLR214W	NON_SYNONYMOUS_CODING	0	0	0	0.0035	0.4362	0	0	0	0	0	0	0	0	0	0	0	0	0	0	0	0	0	0	0	0	0	0	0	0	0	0	0	0	0	0	0	0	0	0	0
chrXII	574582	A	G	0.4916	0	YLR218C	YLR217W	YLR219W	NON_SYNONYMOUS_CODING	0	0	0	0	0	0	0	0	0	0.4916	0	0	0	0	0	0	0	0	0	0	0	0	0	0	0	0	0	0	0	0	0	0	0	0	0	0	0	0	0	0
chrXII	578761	T	A	0.4563	0	YLR218C	YLR222C	YLR221C	NON_SYNONYMOUS_CODING	0	0	0	0	0	0	0	0	0	0	0	0	0	0	0	0	0	0	0	0	0	0	0	0	0	0	0	0	0	0	0	0	0	0	0	0	0	0	0	0
chrXII	585048	C	G	10	1	YLR224W	YLR225C	YLR223C	NON_SYNONYMOUS_CODING	0	0	0	0	0	0	0	0	10	0	0	0	0	0	0	0	0	0	0	0	0	0	0	0	0	0.0032	0	0	0	0	0	0	0	0	0	0	0	0	0	0
chrXII	585154	G	C	0.4458	0	YLR224W	YLR225C	YLR223C	SYNONYMOUS_CODING	0	0	0	0	0	0.4458	0	0	0	0	0	0	0	0	0	0	0	0	0	0	0	0	0	0	0	0	0	0	0	0	0	0	0	0	0	0	0	0	0	0
chrXII	585883	T	A	0.9955	1	YLR223C	YLR225C	NONE	NONE	0	0	0	0	0	0	0	0.9955	0.0128	0	0	0	0	0	0	0	0	0	0	0	0	0	0	0	0	0	0	0	0	0	0	0	0	0	0	0	0	0	0	0
chrXII	586420	G	T	0.5592	0	YLR224W	YLR225C	NONE	NONE	0	0	0	0	0	0	0	0	0	0	0	0	0.5592	0.0196	0	0.0024	0.0039	0	0	0	0	0	0	0	0	0	0	0	0	0	0	0	0	0	0	0	0	0	0	0
chrXII	587168	A	T	10	1	YLR223C	YLR225C	YLR224W	NON_SYNONYMOUS_CODING	0	0	0	0	0	0	0	0	0	0	0	0	0	0	0	0	0	0	0	0	0	0	0	10	0	0	0	0	0	0	0	0	0.0035	0	0	0	0	0	0	0
chrXII	588774	C	T	0.5134	0	YLR226W	YLR224W	YLR225C	SYNONYMOUS_CODING	0	0	0	0	0	0	0	0	0	0	0	0	0	0	0	0	0	0	0	0	0	0	0	0	0	0	0	0	0	0.5134	0	0	0	0	0	0	0	0	0	0
chrXII	591105	T	C	0.4859	0	YLR225C	YLR226W	YLR227C	NON_SYNONYMOUS_CODING	0	0	0.4859	0	0	0	0	0	0	0	0	0	0	0	0	0	0	0	0	0	0	0	0	0	0	0	0	0	0	0	0	0	0	0	0	0	0	0	0	0
chrXII	592555	G	A	0.5242	0	YLR227C	YLR226W	tL(UAG)L1	EXON	0	0.5242	0	0	0	0	0	0	0	0	0	0	0	0	0	0	0	0	0	0	0	0	0	0	0	0	0	0	0	0	0	0	0	0	0	0	0	0	0	0
chrXII	605298	A	T	0.9848	1	YLR229C	tI(UAU)L	NONE	NONE	0	0	0	0	0	0	0	0	0	0	0	0	0	0	0	0	0	0	0	0	0	0	0	0	0	0	0	0	0	0	0	0	0	0	0	0	0	0	0	0
chrXII	610603	A	T	0.446	0	YLR233C	YLR235C	YLR234W	SYNONYMOUS_CODING	0	0	0	0	0	0	0	0	0	0	0	0	0	0	0	0	0	0	0	0	0	0	0	0	0	0	0	0	0	0	0	0	0	0	0	0	0	0	0	0
chrXII	612285	C	G	0.5	0	YLR237W	YLR234W	NONE	NONE	0	0	0	0	0	0	0.5	0	0	0	0	0	0	0	0	0	0	0	0	0	0	0	0	0	0	0	0	0	0	0	0	0	0	0	0	0	0	0	0	0
chrXII	612580	G	T	0.447	0	YLR236C	YLR234W	YLR237W	NON_SYNONYMOUS_CODING	0	0	0	0	0	0	0	0.0022	0	0	0	0	0	0	0	0	0	0	0	0	0	0	0	0.0058	0	0.0029	0	0	0	0	0	0	0	0	0.0029	0	0	0	0	0
chrXII	612651	A	T	0.4804	0	YLR236C	YLR234W	YLR237W	NON_SYNONYMOUS_CODING	0	0	0	0	0.4804	0	0	0	0	0	0	0	0	0	0	0	0	0	0	0	0	0	0	0	0	0	0	0	0	0	0	0	0	0	0	0	0	0	0	0
chrXII	613610	T	C	0.502	0	YLR238W	YLR234W	YLR237W	SYNONYMOUS_CODING	0	0	0	0	0	0	0	0	0	0	0	0	0	0	0	0	0	0	0	0	0	0	0	0	0	0	0	0	0	0	0	0	0	0	0	0	0	0	0	0
chrXII	614552	A	T	0.6187	0	YLR238W	YLR237W	NONE	NONE	0	0	0	0	0	0	0	0	0	0	0	0	0	0	0	0	0	0	0	0	0	0	0	0	0	0	0	0	0	0.6187	0	0	0	0	0	0	0	0	0	0
chrXII	615100	C	A	0.568	0	YLR240W	YLR237W	YLR238W	STOP_GAINED	0	0	0	0	0	0	0.0063	0	0	0.0034	0	0	0	0	0	0	0	0	0	0	0.0051	0	0	0	0.0084	0	0	0	0	0.0072	0	0	0	0	0	0	0	0	0	0
chrXII	619296	T	C	0.5	0	YLR241W	YLR238W	YLR240W	SYNONYMOUS_CODING	0	0	0	0	0.5	0.004	0	0.0023	0	0	0	0	0	0	0	0	0	0	0	0	0	0.0059	0	0	0	0	0	0	0	0	0	0	0	0	0	0	0	0	0	0
chrXII	619561	A	T	0.4461	0	YLR241W	YLR242C	YLR240W	NON_SYNONYMOUS_CODING	0	0	0	0	0	0	0	0	0	0	0	0	0	0	0	0	0	0	0	0	0	0	0	0	0	0	0	0	0	0	0	0	0	0	0	0	0	0	0	0
chrXII	622299	A	G	0.477	0	YLR243W	YLR242C	YLR241W	NON_SYNONYMOUS_CODING	0	0	0	0	0	0	0	0	0	0	0	0	0	0	0	0	0	0	0	0	0	0	0	0	0	0	0	0	0	0.477	0	0	0	0	0	0	0	0	0	0
chrXII	624049	C	A	0.4473	0	YLR243W	YLR244C	NONE	NONE	0	0	0	0	0	0	0	0.0035	0	0	0	0	0	0.0023	0	0	0	0	0.0039	0	0	0	0	0	0	0	0.0024	0	0.0031	0	0	0	0	0	0	0	0	0	0	0
chrXII	625064	G	A	0.4621	0	YLR242C	YLR243W	NONE	NONE	0	0	0	0	0	0	0	0	0	0	0	0	0	0	0	0	0	0	0	0	0	0	0	0	0	0	0	0	0	0	0	0	0	0	0	0	0	0	0	0
chrXII	633637	G	A	0.4876	0	YLR247C	NONE	NONE	NONE	0	0	0	0	0	0	0	0	0	0	0	0.0031	0	0	0	0	0	0	0	0	0	0	0	0	0	0	0	0	0	0	0	0	0	0	0	0	0	0	0	0
chrXII	635821	C	G	0.5292	0	YLR249W	NONE	YLR248W	NON_SYNONYMOUS_CODING	0	0	0	0	0	0	0	0	0	0	0	0	0	0	0	0	0	0	0	0	0	0	0	0	0	0	0	0	0	0	0	0.004	0	0	0	0	0	0.0038	0	0
chrXII	637267	T	C	0.4788	0	YLR250W	YLR248W	YLR249W	SYNONYMOUS_CODING	0	0	0	0	0	0	0	0	0	0	0	0	0	0	0	0	0	0	0	0	0	0	0	0.0058	0	0	0	0	0	0	0	0	0	0	0	0	0	0	0	0
chrXII	638329	T	G	0.5709	0	YLR250W	YLR248W	YLR249W	SYNONYMOUS_CODING	0	0	0	0	0	0	0	0	0	0	0	0	0	0	0	0	0	0	0	0	0.0046	0	0	0	0.0037	0	0	0	0	0	0	0	0	0	0	0	0	0	0	0
chrXII	638331	T	C	0.4853	0	YLR250W	YLR248W	YLR249W	NON_SYNONYMOUS_CODING	0	0	0	0	0	0	0	0.4853	0	0	0	0	0	0	0	0	0	0	0	0	0	0	0	0	0	0	0	0	0	0	0	0	0.0058	0	0	0	0	0	0	0
chrXII	638815	T	A	0.4404	0	YLR250W	YLR248W	YLR249W	SYNONYMOUS_CODING	0	0	0	0	0.0023	0	0	0	0	0	0	0	0	0	0	0	0	0	0	0	0	0	0	0	0	0	0	0	0	0	0	0	0	0	0	0	0	0	0	0
chrXII	639328	C	T	0.4803	0	YLR250W	YLR248W	YLR249W	SYNONYMOUS_CODING	0	0	0	0	0.4803	0	0	0	0	0	0	0	0	0	0	0	0	0	0	0	0	0	0	0	0	0	0	0	0	0	0	0	0	0	0	0	0	0	0	0
chrXII	640836	A	T	0.4803	0	YLR251W	YLR249W	YLR250W	NON_SYNONYMOUS_CODING	0	0	0	0	0	0	0	0	0	0	0	0	0	0	0	0	0	0	0	0	0	0	0	0	0	0	0	0	0	0	0	0	0	0	0	0	0	0	0	0
chrXII	641714	A	T	0.4934	0	YLR252W	YLR250W	YLR251W	NON_SYNONYMOUS_CODING	0	0	0.0032	0.4934	0	0	0	0	0	0	0	0	0	0	0	0	0	0	0	0	0	0	0	0	0	0	0	0	0	0	0	0	0	0	0	0	0	0	0	0
chrXII	643254	T	C	0.5251	0	YLR256W	YLR252W	YLR253W	NON_SYNONYMOUS_CODING	0	0	0	0	0	0	0	0	0	0	0	0	0	0	0	0	0	0	0	0	0	0	0	0	0	0	0	0	0	0	0	0	0	0	0	0	0	0	0	0
chrXII	656978	G	T	0.5602	0	YLR257W	YLR256W-A	tA(AGC)L	EXON	0	0	0	0	0	0	0	0	0	0	0	0	0	0	0	0	0	0	0	0	0	0	0	0	0	0	0	0	0	0.5602	0	0	0	0	0	0	0	0	0	0.0057
chrXII	659460	A	G	0.4647	0	YLR258W	YLR259C	YLR257W	SYNONYMOUS_CODING	0	0	0	0	0	0.0025	0	0	0	0	0	0.4647	0	0	0	0	0	0	0	0	0	0	0.0031	0	0	0	0	0	0	0	0	0	0	0	0	0	0	0	0	0
chrXII	667279	C	A	0.4905	0	YLR259C	YLR261C	YLR260W	NON_SYNONYMOUS_CODING	0	0	0.4905	0	0	0	0	0	0	0	0	0.0026	0	0	0	0	0	0	0	0	0	0	0	0	0.0033	0	0	0	0	0	0	0	0	0	0	0	0	0	0	0
chrXII	670036	A	G	0.4851	0	YLR263W	YLR260W	NONE	NONE	0	0	0	0	0	0	0	0	0	0	0	0	0	0	0	0	0	0	0	0	0	0	0	0	0	0	0	0	0	0	0	0	0	0	0	0	0	0	0	0
chrXII	681228	G	T	0.4574	0	YLR269C	YLR268W	YLR270W	NON_SYNONYMOUS_CODING	0	0	0	0.4574	0	0	0	0	0	0	0	0	0	0	0	0	0	0.003	0	0	0	0	0	0	0	0	0	0	0	0	0	0	0	0	0	0	0	0	0	0
chrXII	681840	C	G	0.4831	0	YLR269C	YLR268W	YLR270W	NON_SYNONYMOUS_CODING	0	0	0	0.0026	0	0	0	0	0	0	0	0	0	0	0	0	0	0	0	0	0	0	0	0	0	0	0	0	0	0	0	0	0	0	0	0	0	0	0	0
chrXII	683750	T	C	0.4708	0	YLR269C	YLR271W	YLR272C	NON_SYNONYMOUS_CODING	0	0	0	0	0	0	0	0	0	0	0	0	0	0	0	0	0	0	0	0	0	0	0	0	0	0	0	0	0	0	0	0	0	0	0	0	0	0	0.0032	0
chrXII	687869	C	G	10	1	YLR272C	YLR273C	tV(AAC)L	EXON	0	0	0	0	0	0	0	0	0	0	0	0	0	0	0	0	0	0	0	0	0	0	0	0	0	0	0	0	0	0	0	0	0	0	0	0	0	0	0	0
chrXII	692245	A	T	0.4425	0	YLR273C	YLR276C	YLR274W	NON_SYNONYMOUS_CODING	0	0	0	0.4425	0	0	0	0	0	0	0	0	0	0.0042	0	0	0	0	0	0	0	0	0	0	0	0	0	0	0	0	0	0	0	0	0	0	0	0	0	0
chrXII	696864	G	T	0.4509	0	YLR276C	YLR277C	NONE	NONE	0	0	0	0	0	0	0	0	0	0	0.0032	0	0	0	0	0	0	0	0.4509	0	0	0	0	0	0	0	0	0.0029	0	0	0	0	0	0	0	0	0	0	0	0.0035
chrXII	696975	G	A	0.4572	0	YLR276C	YLR277C	NONE	NONE	0	0	0	0	0	0	0	0	0	0	0	0	0	0	0	0.4572	0	0	0	0	0	0	0	0	0	0	0	0	0	0	0	0	0	0	0	0	0	0	0	0
chrXII	698180	T	C	0.4316	0	YLR276C	YLR278C	YLR277C	NON_SYNONYMOUS_CODING	0	0	0.4316	0	0	0	0	0	0	0	0	0	0	0	0	0	0	0	0	0	0	0	0	0	0	0	0	0	0	0	0	0	0	0	0	0	0	0	0	0
chrXII	703904	A	G	0.4402	0	YLR279W	YLR280C	YLR278C	SYNONYMOUS_CODING	0	0	0	0.4402	0	0	0	0	0	0	0	0	0	0	0	0	0	0	0	0	0	0	0	0	0	0	0	0	0	0	0	0	0	0	0	0	0	0	0	0
chrXII	704011	T	C	0.9971	1	YLR279W	YLR280C	YLR278C	NON_SYNONYMOUS_CODING	0	0	0	0	0	0	0	0	0	0.0035	0	0	0	0	0	0	0	0	0	0	0	0	0	0	0	0	0	0	0	0	0	0	0	0	0	0	0	0	0	0
chrXII	711210	G	A	0.4536	0	YLR286C	YLR287C-A	YLR287C	NON_SYNONYMOUS_CODING	0	0	0	0	0	0	0	0	0	0	0	0.4536	0	0	0	0	0	0	0	0	0	0	0	0	0	0	0	0	0	0	0	0	0	0	0	0	0	0	0	0
chrXII	720088	C	T	0.5464	0	YLR291C	YLR293C	YLR292C	STOP_GAINED	0	0	0	0	0	0	0	0	0	0	0	0	0	0	0	0	0	0	0	0	0	0	0	0	0	0	0	0	0	0	0	0	0	0	0	0	0	0	0.5464	0
chrXII	722713	T	C	0.4467	0	YLR296W	YLR298C	NONE	NONE	0	0	0	0	0.4467	0.0022	0	0	0	0	0	0	0	0	0	0	0	0	0	0	0	0	0	0	0	0	0	0	0	0	0	0	0	0	0	0	0	0	0	0
chrXII	725367	A	G	10	1	YLR299W	YLR297W	YLR298C	SYNONYMOUS_CODING	0	0	0	0	0	0	0	0	0	0	0	0	0	0	0	0	0	0	0	0	0	0	0	10	0	0	0	0	0	0	0	0	0	0	0	0	0	0	0	0
chrXII	726749	C	G	0.493	0	YLR298C	YLR299C-A	YLR299W	NON_SYNONYMOUS_CODING	0	0	0	0	0	0	0.0034	0	0	0	0	0	0	0	0	0	0	0	0	0	0	0	0	0	0	0	0	0	0	0	0	0	0	0	0	0	0	0	0	0
chrXII	728657	T	A	0.4758	0	YLR300W	YLR299W	NONE	NONE	0	0	0	0	0	0	0	0	0	0	0	0	0	0	0	0	0	0	0	0	0	0	0	0	0	0	0	0	0	0	0	0	0	0	0	0	0.4758	0	0	0
chrXII	728993	A	G	0.5357	0	YLR299C-A	YLR299W	YLR300W	NON_SYNONYMOUS_CODING	0	0	0	0	0	0	0	0	0	0	0	0	0	0	0	0	0.0088	0	0	0	0	0	0	0	0	0	0	0	0	0	0	0	0	0	0	0	0	0	0.5357	0
chrXII	732153	G	A	0.4563	0	YLR303W	YLR302C	tL(UAG)L2	EXON	0	0	0	0	0	0	0	0	0	0	0	0	0	0	0	0	0	0	0	0	0	0	0.4563	0	0	0	0	0	0	0	0	0	0	0	0	0	0	0	0	0
chrXII	732167	C	T	0.5703	0	YLR303W	YLR302C	tL(UAG)L2	EXON	0	0	0	0	0	0	0	0	0	0	0	0	0	0	0	0	0	0	0	0	0	0	0	0	0	0	0	0	0	0	0	0	0	0	0	0	0.0032	0	0	0
chrXII	732303	T	C	0.4856	0	YLR303W	tL(UAG)L2	YLR302C	NON_SYNONYMOUS_CODING	0	0	0	0	0	0	0	0.4856	0	0	0	0	0	0	0	0	0	0	0	0	0	0	0	0	0	0	0	0	0	0	0	0	0	0	0	0	0	0	0	0
chrXII	733544	A	T	10	1	YLR302C	tL(UAG)L2	YLR303W	NON_SYNONYMOUS_CODING	0	0	0	0	0	0	0	0	0	0	0	0	0	0	0	0	0	0	0	0	0	0	0	0	0	0	0	0	0	0	0	0	0	0	0	0	0	0	0	0
chrXII	734809	C	T	0.5238	0	YLR302C	YLR304C	tI(AAU)L1	EXON	0	0	0	0	0	0	0	0	0	0	0	0	0	0	0	0	0	0	0	0	0	0	0.5238	0	0	0	0	0	0	0	0	0	0	0	0	0	0	0	0	0
chrXII	734836	C	A	10	1	YLR302C	YLR304C	tI(AAU)L1	EXON	0	0	0	0	0	0	0	0	0	0	0	0	0	0	0	0.0027	0	0	0	0	0	0	0	0	0	0	0	0	0	0	0	0	0	0	0	0	0	0	0	0.0049
chrXII	737160	C	T	0.4897	0	YLR302C	YLR305C	YLR304C	NON_SYNONYMOUS_CODING	0	0	0	0	0	0	0	0	0	0	0	0	0	0	0	0	0	0	0	0	0	0	0	0	0	0	0	0	0	0	0	0	0	0	0	0	0	0	0	0
chrXII	737217	G	A	0.5	0	YLR302C	YLR305C	YLR304C	NON_SYNONYMOUS_CODING	0	0	0	0	0	0	0	0	0	0	0	0	0	0	0	0.0023	0	0	0	0	0	0	0.5	0	0	0	0.0027	0	0	0	0	0	0	0	0	0	0	0	0	0
chrXII	746649	A	T	0.4469	0	YLR308W	YLR307W	NONE	NONE	0	0	0	0	0	0	0	0	0	0	0	0	0	0	0.4469	0	0	0	0	0	0	0	0	0	0	0	0	0	0	0	0	0	0	0	0	0	0	0	0	0
chrXII	747546	C	A	0.5181	0	YLR308W	YLR307W	NONE	NONE	0	0	0	0	0	0.5181	0	0	0	0	0	0	0	0	0	0	0	0	0	0	0	0	0	0	0	0	0	0	0	0	0	0	0	0	0	0	0.0023	0	0	0
chrXII	748656	G	T	0.563	0	YLR307C-A	YLR309C	YLR308W	NON_SYNONYMOUS_CODING	0	0	0	0	0	0	0	0.0055	0	0	0	0	0	0	0	0	0	0	0	0	0.0038	0	0	0	0	0	0	0	0	0	0	0.0029	0.0025	0	0	0	0	0	0	0.563
chrXII	755830	T	C	0.4218	0	YLR312W-A	YLR311C	YLR310C	NON_SYNONYMOUS_CODING	0	0	0	0	0	0	0	0	0	0	0	0	0	0	0	0	0	0	0	0	0	0	0	0	0	0	0	0	0	0	0	0	0	0	0.4218	0	0	0	0	0
chrXII	758884	G	T	0.5069	0	YLR312C	YLR313C	NONE	NONE	0.0035	0	0	0	0	0	0	0	0	0	0	0	0	0	0	0.0019	0	0	0	0	0	0	0	0	0	0	0.0023	0	0	0	0	0	0	0	0	0	0	0.5069	0	0
chrXII	761795	T	A	0.4949	0	YLR312C	YLR314C	YLR313C	NON_SYNONYMOUS_CODING	0	0	0	0	0	0	0	0	0	0.0057	0	0	0	0	0	0	0	0	0	0	0	0	0	0	0	0	0.4949	0	0	0	0	0	0	0	0	0	0	0	0	0
chrXII	762867	A	G	0.4643	0	YLR313C	YLR316C	YLR314C	NON_SYNONYMOUS_CODING	0	0	0	0	0	0	0	0	0	0	0	0	0	0	0	0	0	0	0	0	0	0.0108	0	0	0	0	0	0	0	0	0	0	0	0	0.4643	0	0	0	0	0
chrXII	766939	A	G	0.4315	0	YLR316C	YLR317W	YLR318W	NON_SYNONYMOUS_CODING	0	0	0	0	0	0	0.4315	0	0	0	0	0	0	0.0032	0	0	0	0	0	0	0	0	0	0	0	0	0	0	0	0	0	0	0	0	0	0	0.0029	0	0	0
chrXII	768589	T	C	0.5191	0	YLR316C	YLR319C	YLR318W	NON_SYNONYMOUS_CODING	0	0	0	0	0	0	0	0	0	0	0	0	0	0	0	0	0	0	0	0	0	0	0	0	0	0	0	0	0	0	0	0	0	0	0.5191	0	0	0	0	0
chrXII	769959	T	C	0.5184	0	YLR320W	YLR318W	YLR319C	NON_SYNONYMOUS_CODING	0	0	0	0	0	0	0	0	0	0	0	0	0	0	0	0	0	0	0	0	0	0	0	0	0	0	0	0	0	0	0	0.0031	0.5184	0	0	0	0	0	0	0.0094
chrXII	771397	T	A	0.527	0	YLR320W	YLR318W	YLR319C	NON_SYNONYMOUS_CODING	0	0.527	0	0	0	0	0	0	0	0	0	0	0	0	0	0	0	0	0	0	0	0	0	0	0	0	0	0	0	0	0	0	0	0	0	0	0	0	0	0
chrXII	771410	C	T	0.5317	0	YLR320W	YLR318W	YLR319C	NON_SYNONYMOUS_CODING	0	0.5317	0	0	0	0	0	0	0	0.0026	0	0	0	0	0	0	0	0	0	0	0	0	0	0	0	0	0	0	0	0	0	0	0	0	0	0	0	0	0	0
chrXII	771647	G	T	0.47	0	YLR320W	YLR318W	YLR319C	NON_SYNONYMOUS_CODING	0	0	0	0	0	0.0028	0	0	0	0	0	0	0	0	0	0	0	0	0	0	0	0	0	0	0	0	0.003	0	0	0	0	0	0	0.0031	0	0	0.0067	0	0	0
chrXII	778762	A	T	0.5229	0	YLR324W	YLR322W	YLR323C	NON_SYNONYMOUS_CODING	0	0	0	0	0	0	0	0	0	0	0	0	0	0	0	0	0	0	0	0	0	0	0	0	0	0	0	0	0	0	0	0	0	0	0	0	0	0	0	0
chrXII	782196	C	A	0.4473	0	YLR325C	YLR327C	YLR326W	NON_SYNONYMOUS_CODING	0	0	0	0	0	0	0	0	0	0	0	0	0	0	0	0	0	0	0	0	0	0	0.4473	0	0	0	0	0	0	0	0	0	0	0	0	0	0	0	0	0
chrXII	783334	A	G	10	1	tS(GCU)L	YLR326W	YLR327C	SYNONYMOUS_CODING	0	0	0	0	0	0	0	0	0	0	0	0	0	0	0	0	0	0	0	0	0	0	0	0	0	0	0	0.0039	10	0	0	0	0	0	0	0	0	0	0	0
chrXII	784336	T	A	0.4649	0	tS(GCU)L	YLR326W	NONE	NONE	0	0	0	0	0	0	0	0	0	0	0	0	0	0	0	0	0	0	0	0	0	0	0	0	0.004	0	0	0	0	0	0	0	0	0.0056	0	0	0	0	0	0
chrXII	787448	C	A	0.4355	0	YLR330W	YLR329W	NONE	NONE	0	0	0.4355	0	0	0	0	0	0	0	0	0	0	0	0	0	0	0	0	0	0	0	0	0	0	0	0	0	0	0	0	0	0	0	0	0.0024	0	0	0	0
chrXII	787527	T	A	0.4784	0	YLR330W	YLR329W	NONE	NONE	0	0	0	0	0	0	0	0	0	0	0	0	0.4784	0.0185	0	0	0	0	0	0	0	0	0	0	0	0	0	0	0	0	0	0	0	0	0	0	0	0	0	0
chrXII	791439	C	T	0.9891	1	YLR331C	YLR330W	YLR332W	NON_SYNONYMOUS_CODING	0	0	0	0	0	0	0	0.0024	0	0	0	0	0	0	0	0	0	0	0	0	0	0.0046	0	0.9891	0	0	0	0	0	0	0	0	0	0	0	0	0	0	0	0
chrXII	791637	A	T	0.4478	0	YLR331C	YLR330W	YLR332W	NON_SYNONYMOUS_CODING	0	0	0	0	0	0	0	0	0	0	0	0	0	0	0	0	0	0	0	0	0	0	0	0	0	0	0	0	0	0	0	0	0	0	0	0	0	0.0042	0	0
chrXII	792039	C	A	0.4769	0	YLR331C	YLR332W	NONE	NONE	0	0	0	0	0	0	0	0	0	0	0	0	0	0	0	0	0	0	0	0	0	0	0	0	0	0	0	0.4769	0	0.004	0	0	0	0.0028	0	0.0063	0	0	0	0
chrXII	793231	C	T	0.5387	0	tD(GUC)L2	snR61	NONE	NONE	0	0	0	0	0	0	0	0	0	0.5387	0	0	0	0	0	0	0	0	0	0	0	0	0	0.0063	0	0	0	0	0	0	0	0	0	0	0	0	0	0	0	0
chrXII	793559	T	C	10	1	tD(GUC)L2	snR61	NONE	NONE	0	0	0	0	0	0	0	0	10	0	0	0	0	0	0	0	0	0	0	0	0	0	0	0	0	0	0	0	0	0	0	0	0	0	0	0	0	0	0	0
chrXII	795019	A	T	0.5546	0	snR55	YLR333C	snR57	EXON	0	0	0	0	0	0	0	0	0	0	0	0	0	0	0.5546	0	0	0	0	0	0	0	0	0	0	0	0	0	0	0	0	0	0	0	0	0	0	0	0	0
chrXII	800584	T	A	0.5094	0	YLR334C	YLR335W	YLR336C	NON_SYNONYMOUS_CODING	0	0	0	0	0	0.5094	0	0	0	0	0	0	0	0	0	0	0	0	0	0	0	0	0	0	0	0	0	0	0	0	0	0	0	0	0	0	0	0	0	0
chrXII	803268	G	T	0.5549	0	YLR336C	YLR339C	YLR337C	NON_SYNONYMOUS_CODING	0	0	0	0	0	0	0	0	0	0	0	0	0	0	0	0	0	0	0	0	0	0	0	0	0	0	0	0	0	0	0	0	0	0	0	0	0	0	0	0
chrXII	803997	T	C	0.4734	0	YLR338W	YLR339C	YLR337C	SYNONYMOUS_CODING	0	0	0	0	0	0	0	0	0	0	0	0	0	0	0	0	0	0	0	0	0	0	0	0	0	0	0	0	0	0	0	0	0	0	0	0	0	0	0	0
chrXII	809814	A	G	0.4919	0	YLR342W	YLR341W	NONE	NONE	0	0	0	0	0	0	0.0028	0	0	0	0	0	0	0	0	0	0	0	0.4919	0	0	0	0	0	0	0	0	0	0	0	0	0	0	0	0	0	0	0	0	0
chrXII	811114	T	C	0.4904	0	YLR342W-A	YLR341W	YLR342W	NON_SYNONYMOUS_CODING	0	0	0	0	0	0	0	0	0	0	0	0	0	0	0	0	0	0	0	0	0	0	0	0	0	0	0	0	0	0	0	0	0	0	0	0	0	0	0	0
chrXII	811979	A	G	0.5206	0	YLR342W-A	YLR341W	YLR342W	SYNONYMOUS_CODING	0.0049	0	0	0	0	0	0	0	0	0.0035	0	0	0	0	0.0027	0	0	0	0	0	0	0	0	0	0	0	0	0	0	0	0	0	0	0	0	0	0	0	0.5206	0
chrXII	812080	G	T	0.446	0	YLR342W-A	YLR341W	YLR342W	NON_SYNONYMOUS_CODING	0	0	0	0	0	0	0	0	0	0	0.0025	0	0	0	0	0	0	0	0	0	0	0	0	0	0	0	0	0	0	0	0	0	0	0	0.003	0	0	0	0	0
chrXII	815368	G	T	0.4636	0	YLR342W-A	NONE	YLR342W	NON_SYNONYMOUS_CODING	0	0	0	0	0	0	0	0	0	0.4636	0	0	0	0	0	0	0	0	0	0	0	0	0	0	0	0	0	0	0	0	0	0.0066	0	0	0	0	0	0	0	0
chrXII	816462	T	A	0.4343	0	tR(CCG)L	YLR342W-A	YLR343W	SYNONYMOUS_CODING	0	0	0	0	0	0	0	0	0	0	0	0	0	0	0	0	0	0	0	0	0	0	0	0	0	0	0	0	0	0	0	0	0	0	0	0	0	0	0	0
chrXII	821248	A	G	0.5312	0	YLR347W-A	YLR346C	YLR345W	SYNONYMOUS_CODING	0	0	0	0	0	0	0	0	0	0	0	0	0	0	0	0	0	0	0	0	0	0	0	0	0	0	0	0	0	0	0	0	0	0	0	0	0	0	0.5312	0
chrXII	826748	C	A	0.4553	0	YLR347C	YLR348C	NONE	NONE	0	0	0	0	0	0	0	0	0	0	0	0	0	0	0	0	0	0	0	0	0	0	0	0	0	0	0	0	0	0	0	0	0	0	0	0	0	0	0	0
chrXII	833862	G	T	0.4825	0	YLR353W	YLR352W	NONE	NONE	0	0	0	0.4825	0	0	0	0.0037	0	0	0	0	0	0	0	0	0	0	0	0	0	0	0	0	0	0	0	0.0037	0	0	0	0	0	0	0	0	0	0	0	0
chrXII	834309	A	G	0.4951	0	YLR353W	YLR352W	NONE	NONE	0	0	0	0	0	0	0	0.4951	0	0	0	0	0	0	0	0	0	0	0	0	0	0	0	0	0	0	0	0	0	0	0	0	0	0	0	0	0.0022	0	0	0
chrXII	835101	A	G	0.4861	0	YLR351C	YLR354C	YLR353W	NON_SYNONYMOUS_CODING	0	0	0	0	0	0	0	0	0	0	0	0	0.4861	0.0127	0	0	0	0	0	0	0	0	0	0	0	0	0	0	0	0	0	0	0	0	0	0.0035	0	0	0	0
chrXII	835499	C	G	0.5161	0	YLR356W	YLR354C	YLR353W	NON_SYNONYMOUS_CODING	0	0	0	0	0	0	0	0	0	0.0038	0	0	0	0.0031	0	0.5161	0	0	0	0	0	0	0	0	0	0	0	0	0	0	0	0	0	0	0	0	0	0	0	0
chrXII	838278	C	T	0.5224	0	YLR354C	YLR353W	YLR355C	SYNONYMOUS_CODING	0	0	0	0	0	0	0	0	0	0	0	0	0	0	0	0	0	0	0	0	0	0	0	0	0	0	0	0	0	0	0	0	0	0.0022	0	0	0	0	0	0
chrXII	838753	A	G	0.4303	0	YLR354C	YLR353W	YLR355C	NON_SYNONYMOUS_CODING	0	0	0	0	0	0	0	0	0	0	0	0	0	0	0	0	0	0	0	0	0	0	0	0	0	0	0	0	0	0	0	0	0	0	0	0	0	0	0	0
chrXII	839119	G	A	0.5	0	YLR356W	YLR353W	YLR355C	NON_SYNONYMOUS_CODING	0	0	0	0	0	0	0	0	0	0	0	0	0	0	0	0	0	0	0	0	0	0	0	0	0	0	0	0	0	0	0	0	0	0	0	0	0	0	0	0
chrXII	839999	G	T	0.4494	0	YLR356W	YLR358C	NONE	NONE	0	0	0	0	0	0	0	0	0	0	0	0	0	0.0029	0	0	0	0	0	0	0	0	0	0	0	0.4494	0	0	0	0	0	0	0.0032	0	0.0062	0	0.0026	0	0	0
chrXII	840150	G	T	0.4715	0	YLR356W	YLR358C	NONE	NONE	0	0	0	0	0	0	0	0	0	0	0	0	0	0	0	0	0	0	0	0	0	0	0	0	0	0	0	0	0	0.0038	0	0	0	0.0025	0	0	0	0	0	0
chrXII	840458	A	G	0.4888	0	YLR357W	YLR358C	YLR356W	NON_SYNONYMOUS_CODING	0	0	0	0	0	0	0	0	0	0	0	0	0	0	0.0038	0	0	0	0	0	0	0	0	0	0	0	0	0	0	0	0	0	0	0	0	0	0	0	0	0
chrXII	841282	C	A	0.458	0	YLR357W	YLR356W	NONE	NONE	0	0	0	0	0	0	0	0	0	0	0	0	0	0	0	0.458	0	0	0	0	0	0	0	0	0	0	0	0	0	0	0	0	0	0	0	0	0	0	0	0
chrXII	841916	C	T	0.4491	0	YLR359W	YLR356W	YLR357W	NON_SYNONYMOUS_CODING	0	0	0	0	0	0	0	0	0	0	0	0	0	0	0	0	0	0	0	0	0	0	0	0	0	0	0	0	0	0	0	0	0	0	0	0	0	0	0	0
chrXII	847970	T	C	0.4729	0	YLR362W	YLR360W	YLR361C	NON_SYNONYMOUS_CODING	0	0	0	0	0	0	0	0	0	0	0	0	0	0	0	0	0	0	0	0	0	0	0	0	0	0.4729	0	0	0	0	0	0	0	0	0	0	0	0	0	0
chrXII	855811	G	A	0.5119	0	YLR364C-A	YLR365W	YLR366W	NON_SYNONYMOUS_CODING	0	0	0	0.5119	0	0	0	0	0	0	0	0	0	0	0.0028	0	0	0	0	0	0	0	0	0	0	0	0	0	0	0	0	0	0	0	0	0.0031	0	0	0	0
chrXII	856677	A	T	0.5752	0	snR44	YLR366W	YLR367W	INTRON	0	0	0	0	0	0	0	0	0	0	0	0	0	0	0	0	0	0	0	0	0	0	0	0	0	0	0	0	0	0	0	0	0	0	0	0	0	0	0	0
chrXII	857260	C	A	0.5157	0	YLR368W	snR44	YLR367W	NON_SYNONYMOUS_CODING	0	0	0	0	0	0	0	0	0	0	0	0	0	0	0	0	0	0	0	0	0	0	0	0	0	0.5157	0	0	0	0	0	0	0.0035	0	0	0	0	0	0	0
chrXII	859630	C	A	0.4965	0	YLR371W	YLR368W	YLR369W	NON_SYNONYMOUS_CODING	0	0	0	0	0	0	0	0	0	0	0	0	0	0	0	0	0	0	0	0	0	0	0	0	0	0	0	0	0	0	0	0	0	0	0	0	0	0	0	0
chrXII	859877	A	G	0.5	0	YLR371W	YLR368W	YLR369W	SYNONYMOUS_CODING	0	0	0	0	0	0	0	0	0	0	0	0	0	0.0031	0	0	0	0	0	0	0	0	0	0	0	0	0	0	0	0	0	0	0	0	0	0	0	0	0	0
chrXII	861155	T	A	0.4611	0	YLR371W	YLR370C	YLR369W	SYNONYMOUS_CODING	0	0	0	0	0	0	0	0	0	0	0	0	0	0	0	0	0	0	0	0	0	0	0	0	0	0	0	0	0	0	0	0	0	0	0	0	0.4611	0	0	0
chrXII	862108	T	C	0.5622	0	YLR371W	YLR369W	YLR370C	NON_SYNONYMOUS_CODING	0	0	0	0	0	0	0	0	0	0	0	0	0	0	0	0	0	0.0053	0	0	0	0	0	0.0108	0	0	0	0	0	0.5622	0	0	0	0	0	0	0	0	0	0
chrXII	865312	A	T	0.9976	1	YLR372W	YLR373C	YLR371W	NON_SYNONYMOUS_CODING	0	0	0	0	0	0	0	0	0	0	0	0	0	0	0	0	0	0	0	0	0	0	0	0	0	0	0	0	0	0	0	0	0	0	0	0	0	0	0	0
chrXII	867006	C	A	0.6098	0	YLR372W	YLR371W	NONE	NONE	0	0	0	0	0	0	0	0	0	0	0	0	0	0	0	0	0	0	0	0	0	0	0	0	0	0	0.003	0	0	0	0	0	0	0	0	0	0.0027	0.0037	0	0
chrXII	875445	C	T	0.5183	0	YLR377C	YLR378C	tK(UUU)L	EXON	0	0	0	0	0	0	0	0	0	0	0	0	0	0	0.0037	0	0	0	0	0	0	0	0	0	0	0	0	0	0	0	0	0	0	0	0	0	0	0	0	0
chrXII	877456	G	A	0.4985	0	YLR378C	YLR379W	NONE	NONE	0	0	0	0	0	0	0	0	0	0	0	0	0	0	0	0	0	0	0	0	0	0	0	0	0	0	0	0	0	0	0	0	0	0	0	0	0	0	0	0
chrXII	879018	C	A	0.4943	0	YLR381W	YLR379W	YLR380W	NON_SYNONYMOUS_CODING	0	0	0	0	0	0	0	0	0	0	0	0	0.4943	0.0146	0	0	0	0	0	0	0	0	0	0	0	0	0	0	0	0	0	0	0	0	0	0	0	0	0	0
chrXII	881666	A	T	0.4911	0	YLR383W	YLR382C	YLR381W	NON_SYNONYMOUS_CODING	0	0	0	0	0	0	0	0	0	0.4911	0	0	0	0	0	0	0	0	0	0	0	0	0	0	0	0	0	0	0	0	0	0	0	0	0	0	0	0	0	0
chrXII	881698	A	T	0.5053	0	YLR383W	YLR382C	YLR381W	NON_SYNONYMOUS_CODING	0	0	0	0	0	0	0	0	0	0	0	0	0	0	0	0	0	0	0	0	0	0	0	0	0	0	0	0	0	0	0	0	0	0	0	0	0	0	0	0
chrXII	886935	A	G	0.4575	0	YLR382C	YLR384C	YLR383W	NON_SYNONYMOUS_CODING	0	0	0	0	0	0	0	0	0	0	0	0	0	0	0	0.4575	0	0	0	0	0	0	0	0	0	0	0	0	0	0	0	0	0	0	0	0	0	0	0	0
chrXII	887433	C	A	0.5	0	YLR382C	YLR384C	YLR383W	SYNONYMOUS_CODING	0	0	0.0051	0	0	0	0	0	0	0	0	0	0	0	0	0	0	0	0	0	0	0	0	0	0	0	0.0024	0	0	0.003	0	0	0	0	0	0	0.0024	0	0	0
chrXII	889356	T	C	0.5216	0	YLR386W	YLR383W	YLR384C	NON_SYNONYMOUS_CODING	0	0	0	0	0	0	0	0	0	0	0	0	0	0	0	0	0	0	0	0	0	0	0	0	0	0	0	0	0	0	0	0	0	0	0	0	0	0	0	0
chrXII	890405	T	C	0.412	0	YLR386W	YLR383W	YLR384C	SYNONYMOUS_CODING	0	0	0	0	0	0	0	0	0	0.0034	0	0	0	0	0	0	0	0	0	0	0	0	0	0	0	0	0	0	0	0	0	0	0	0	0.0037	0	0	0	0	0
chrXII	890512	C	A	0.4391	0	YLR386W	YLR383W	YLR384C	NON_SYNONYMOUS_CODING	0	0.0031	0	0	0	0	0	0	0	0	0	0	0	0	0	0	0	0	0	0	0	0	0	0	0	0	0	0	0.0036	0	0	0	0	0	0	0	0	0	0	0
chrXII	893337	G	T	0.4905	0	YLR386W	YLR387C	YLR385C	SYNONYMOUS_CODING	0	0	0	0	0	0	0.0026	0	0	0	0	0	0	0.0028	0.0026	0	0	0	0	0	0	0	0	0	0	0	0.4905	0	0	0	0.0042	0	0	0	0.0033	0	0	0	0	0
chrXII	893977	C	T	0.4927	0	YLR385C	YLR387C	YLR386W	NON_SYNONYMOUS_CODING	0	0	0	0	0	0	0	0.003	0	0	0.4927	0	0	0	0	0	0	0	0	0	0	0	0	0	0	0	0	0	0	0	0	0	0	0	0	0	0	0	0	0
chrXII	894619	G	T	0.48	0	YLR385C	YLR387C	YLR386W	NON_SYNONYMOUS_CODING	0	0.48	0	0	0	0	0	0	0	0	0	0	0	0	0.0028	0.0025	0	0	0	0	0	0	0	0	0	0	0	0	0	0	0	0	0	0	0	0	0.0051	0.0037	0	0
chrXII	894967	C	T	10	1	YLR385C	YLR387C	YLR386W	NON_SYNONYMOUS_CODING	0	0	0	0.0027	0	0	0	0	0	0	0	0	0	0	0	0	0	0	0	0	0	0	0	0	0	0	0	0	0	0	0	0	0	0	10	0	0	0	0	0
chrXII	897951	C	A	0.477	0	YLR387C	YLR389C	NONE	NONE	0	0	0	0	0	0	0	0	0	0	0	0	0	0	0	0.0026	0	0	0	0	0	0	0	0	0	0	0.0024	0	0	0	0	0	0	0	0	0	0	0	0	0
chrXII	898931	A	G	0.4825	0	snR34	YLR388W	NONE	NONE	0	0.4825	0	0	0	0	0	0	0	0	0	0	0	0	0	0	0	0	0	0	0	0	0	0	0	0	0	0	0	0	0	0	0	0	0	0	0	0	0	0
chrXII	906774	A	T	0.9121	1	YLR393W	YLR390W-A	NONE	NONE	0	0	0	0	0	0	0	0	0	0	0	0	0	0	0	0	0	0	0	0	0	0	0	0	0	0	0	0	0	0	0.9121	0	0	0	0	0	0	0	0	0
chrXII	909174	C	A	0.6454	0	YLR392C	YLR395C	YLR394W	NON_SYNONYMOUS_CODING	0	0	0	0	0	0	0	0	0	0	0	0.0068	0	0	0	0	0	0.0043	0	0	0	0	0	0	0	0	0	0.513	0	0	0	0.6454	0	0	0	0	0	0	0.0074	0
chrXII	914221	T	A	0.457	0	YLR396C	YLR398C	YLR397C	SYNONYMOUS_CODING	0	0	0	0	0	0	0	0	0	0	0	0	0	0	0	0	0	0	0	0	0	0	0	0	0	0	0	0	0	0	0	0	0	0	0	0	0	0	0.457	0
chrXII	916311	T	C	0.996	1	YLR397C	YLR399C	YLR398C	SYNONYMOUS_CODING	0	0.0045	0	0	0	0	0	0	0	0	0	0	0	0	0.0028	0	0	0	0	0	0	0	0	0	0	0	0	0	0	0	0	0	0	0	0	0	0	0	0	0
chrXII	920893	C	A	0.9961	1	YLR400W	YLR401C	YLR399C	NON_SYNONYMOUS_CODING	0	0	0	0	0	0	0	0.9961	0	0	0	0	0	0	0	0	0	0	0	0	0	0	0	0	0	0.0043	0	0	0.0042	0	0	0	0	0	0	0	0	0	0	0
chrXII	921276	T	A	0.4153	0	YLR400W	YLR399W-A	YLR399C	SYNONYMOUS_CODING	0	0	0	0	0	0	0	0	0	0	0	0	0	0	0	0	0	0	0	0	0	0	0	0	0	0	0	0	0	0	0	0	0	0	0	0	0	0	0	0.4153
chrXII	922242	C	G	0.4961	0	YLR399C	YLR401C	YLR400W	NON_SYNONYMOUS_CODING	0	0	0	0	0	0	0.003	0	0	0	0	0	0	0	0	0	0	0	0	0	0	0	0	0	0	0	0	0	0	0	0	0	0	0	0	0	0	0	0	0
chrXII	924429	T	G	0.5458	0	YLR402W	YLR400W	YLR401C	NON_SYNONYMOUS_CODING	0	0	0	0	0	0	0.5458	0	0	0	0	0	0	0	0	0	0	0	0	0	0	0	0	0	0	0	0	0	0	0	0	0	0	0	0	0	0	0	0	0
chrXII	931460	A	T	0.4978	0	YLR407W	YLR405W	YLR406C	INTRON	0	0	0	0	0	0	0	0	0	0	0	0	0	0	0	0	0	0	0	0	0	0	0	0	0	0.0042	0	0	0	0	0	0	0	0	0	0	0	0	0	0
chrXII	931581	G	T	0.474	0	YLR407W	YLR406C-A	YLR406C	INTRON	0	0	0	0	0	0	0	0	0	0.474	0	0	0	0	0	0	0	0	0	0	0	0	0	0	0	0	0	0	0	0	0	0	0	0	0	0	0	0	0	0
chrXII	935751	A	T	0.4613	0	YLR408C	YLR407W	YLR409C	NON_SYNONYMOUS_CODING	0	0	0	0	0	0	0	0	0	0	0	0	0	0	0	0	0	0	0	0	0	0	0	0	0	0	0	0	0	0	0	0	0	0	0	0	0	0	0	0
chrXII	937755	C	A	0.4781	0	YLR409C	YLR407W	YLR410W	NON_SYNONYMOUS_CODING	0	0	0	0	0	0	0	0	0	0	0	0	0	0	0	0	0	0	0	0	0	0	0	0	0	0	0	0	0	0	0	0	0	0	0	0	0	0	0	0
chrXII	947810	T	A	0.5417	0	YLR412W	YLR410W-B	YLR411W	NON_SYNONYMOUS_CODING	0	0	0	0	0	0	0	0	0	0	0	0	0	0	0	0	0	0	0	0	0	0	0	0	0	0	0	0	0	0	0	0	0	0	0	0	0	0	0	0
chrXII	951016	A	G	0.4711	0	YLR413W	YLR412W	NONE	NONE	0	0	0	0	0	0	0	0	0	0	0.4711	0	0	0	0	0	0	0	0	0	0	0	0	0	0	0	0	0	0	0	0	0	0	0	0	0	0	0	0	0
chrXII	951510	C	A	10	1	YLR412C-A	YLR414C	YLR413W	NON_SYNONYMOUS_CODING	0	0	0	0	0	0	0	0	0	0	0	0	0	0	0	0	0	0	0	0	0	0	0	0	0	0	0.0022	0	0	0	0	0	0	0	0	0	0	0	0.0027	0
chrXII	952075	C	G	0.4693	0	YLR412C-A	YLR414C	YLR413W	NON_SYNONYMOUS_CODING	0	0	0	0	0	0	0	0	0	0	0	0	0	0	0	0	0	0	0	0	0	0	0	0	0	0	0	0	0	0	0	0	0	0	0	0	0	0	0	0
chrXII	952518	C	A	0.4238	0	YLR412C-A	YLR414C	YLR413W	NON_SYNONYMOUS_CODING	0	0	0	0	0	0	0.0022	0	0	0	0	0	0	0	0.0021	0	0	0	0	0.0032	0	0	0	0	0.0026	0	0	0	0	0	0	0	0	0	0	0	0	0	0	0
chrXII	955459	C	G	0.9916	1	YLR416C	YLR418C	YLR417W	NON_SYNONYMOUS_CODING	0	0	0	0	0	0	0	0	0	0	0	0	0	0	0	0	0	0	0	0	0	0.9916	0	0	0	0	0	0	0	0	0	0	0	0	0	0	0	0	0	0
[truncated: 905 more rows]
[truncated: 56 more columns]
